# Supplementary material for: Iodine-dependent oxidative regioselective aminochalcogenation of indolines
Source: Royal Society of Chemistry journal article supplement (doi:10.1039/d3cc05999e), 2024-01-01

# Electronic Supplementary Information

## **Iodine-Dependent                      Oxidative                      Regioselective Aminochalcogenation of Indolines**

Xiaoxiang Zhang, Chenrui Liu, Wanxing Wei, Zhuan Zhang, Taoyuan Liang\*

Guangxi Key Laboratory of Electrochemical Energy Materials, Guangxi Colleges and Universities Key Laboratory of Applied Chemistry Technology and Resource Development, School of Chemistry and Chemical Engineering, Guangxi University, Nanning, Guangxi 530004, People's Republic of China.

\*E-mail: [taoyuanliang@gxu.edu.cn](mailto:taoyuanliang@gxu.edu.cn)

## TABLE OF CONTENTS

|                                                            |          |
|------------------------------------------------------------|----------|
| <b>1. General information.</b>                             | S3       |
| <b>2. Substrates preparation.</b>                          | S4-S6    |
| <b>3. Optimization of reaction conditions.</b>             | S7-S11   |
| <b>4. Typical procedure for the synthesis of 4 and 40.</b> | S11-S12  |
| <b>5. Control experiments.</b>                             | S13-S15  |
| <b>6. Synthetic utility.</b>                               | S16-S19  |
| <b>7. Single crystal X-ray diffraction of 10.</b>          | S19-S23  |
| <b>8. Plausible reaction pathways.</b>                     | S24      |
| <b>9. References.</b>                                      | S24      |
| <b>10. Analytical data of the obtained compounds.</b>      | S25-S58  |
| <b>11. NMR spectra of the obtained compounds.</b>          | S59-S142 |

## MATERIALS AND METHODS

### 1. General information.

All air- and moisture-insensitive reactions were carried out under an ambient atmosphere and monitored by thin-layer chromatography (TLC). Concentration under reduced pressure was performed by rotary evaporation at 50–60 °C at an appropriate pressure. Purified compounds were further dried under vacuum ( $10^{-6}$ – $10^{-3}$  bar). Yields refer to purified and spectroscopically pure compounds, unless otherwise stated.

### Solvents

All solvents were purchased from Greagent (Shanghai Titansci incorporated company) and used without further purification and used as received.

### Chromatography

Thin layer chromatography (TLC) (Qingdao Jiyida silica gel reagent factory GF254) was performed using EMD TLC plates pre-coated with 250  $\mu\text{m}$  thickness silica gel 60 F254 plates and visualized by fluorescence quenching under UV light and  $\text{I}_2$  stain. Column chromatography was performed on silica gel (200-300 mesh).

### Spectroscopy and Instruments

NMR spectra were recorded on Bruker-400/500/600 spectrometer operating at (600 MHz, 565 MHz and 151 MHz) for  $^1\text{H}$ ,  $^{19}\text{F}$  and  $^{13}\text{C}$  acquisitions, respectively. Chemical shifts are reported in ppm with the solvent residual peak as the internal standard. For  $^1\text{H}$ -NMR:  $\text{CDCl}_3$ , 7.26; For  $^{13}\text{C}$ -NMR:  $\text{CDCl}_3$ , 77.16;  $^{19}\text{F}$ -NMR spectra were referenced using a unified chemical shift scale based on the  $^1\text{H}$  resonance of tetramethylsilane (1% v/v solution in the respective solvent). Data is reported as follows: s = singlet, d = doublet, t = triplet, q = quartet, quin = quintet, sext = sextet, sept = septet, m = multiplet, bs = broad singlet; coupling constants in Hz; integration.

### Instrument

All reactions were heated by metal sand bath (WATTCAS, LAB-500, <https://www.wattcas.com>).

## EXPERIMENTAL DATA

### 2. Substrates preparation.

#### (1) General Procedure for the preparation of indoline derivatives (1a-1n)<sup>1</sup>:

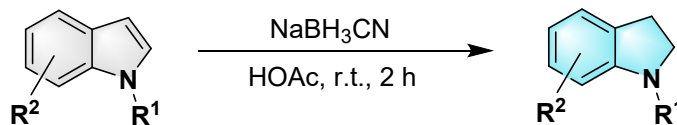

**Procedure for indoline (1f):** To a suspended solution of indole (1.33 g, 11.4 mmol) in HOAc (20.0 mL), NaBH<sub>3</sub>CN (1.89 g, 35.0 mmol) was added dropwise at 0 °C. The heterogeneous mixture was stirred for 2 h at room temperature. Quenched with saturated NH<sub>4</sub>Cl (20.0 mL), and extracted with ether (4 × 75.0 mL). The organic layers were combined, washed with brine, dried over anhydrous Na<sub>2</sub>SO<sub>4</sub> and concentrated in vacuo. The resulting oil was purified by column chromatography on silica gel (petroleum ether) afforded **1f** as a yellow oil. Similarly, the other indoline derivatives were prepared from the corresponding indoles.

#### NMR Spectroscopy (1f):

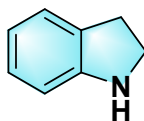

<sup>1</sup>H-NMR (600 MHz, Chloroform-*d*) δ 7.20 (d, *J* = 7.3 Hz, 1H), 7.10 (t, *J* = 7.6 Hz, 1H), 6.79 (t, *J* = 7.4 Hz, 1H), 6.72 (d, *J* = 7.8 Hz, 1H), 3.60 (q, *J* = 8.4 Hz, 3H), 3.10 (t, *J* = 8.4 Hz, 2H), known compound.

#### (2) General Procedure for the preparation of disulfide derivatives (3a-3q)<sup>2</sup>:

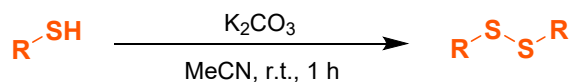

**Procedure for 1,2-bis(4-chlorophenyl)disulfane (3e):** To a round bottle (50 mL) were added 4-chlorobenzenethiol (5.0 mmol), anhydrous potassium carbonate (0.69 g, 5.0 mmol), and MeCN (10 mL) sequentially, and the reaction was conducted at room temperature under air atmosphere for 1 hour. And the desired disulfides were obtained quantitatively, after filter and concentration. Other disulfide derivatives were prepared in a similar approach.

#### NMR Spectroscopy (3e):

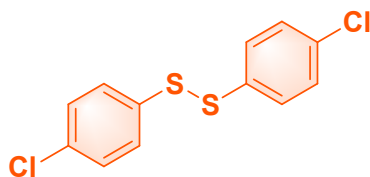

$^1\text{H-NMR}$  (600 MHz, Chloroform-*d*)  $\delta$  7.43 (d,  $J = 8.6$  Hz, 2H), 7.30 (d,  $J = 8.6$  Hz, 2H), known compound.

**(3) General Procedure for the preparation of 1,2-diphenyldiselenane (3r)<sup>3</sup>:**

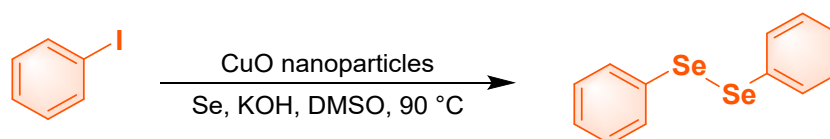

**Procedure for 1,2-diphenyldiselenane (3r):** To a stirred solution of Se metal (2.0 mmol) and iodobenzene (1.0 mmol) in dry DMSO (2.0 mL) was added CuO nanoparticles (10.0 mol%) followed by KOH (2.0 equiv) under argon atmosphere at 90 °C. The progress of the reaction was monitored by TLC. After the reaction was complete, the reaction mixture was allowed to cool to room temperature and it was then quenched with water and extracted with EtOAc. The combined organic layers were dried over anhydrous  $\text{Na}_2\text{SO}_4$ . The solvent was removed under reduced pressure, and the residue was purified by flash chromatography on a silica gel column chromatography (Pet Ether) to give the pure diselenides.

**NMR Spectroscopy (3r):**

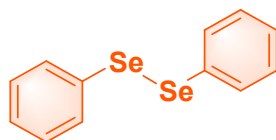

$^1\text{H-NMR}$  (600 MHz, Chloroform-*d*)  $\delta$  7.81–7.52 (m, 4H), 7.36–7.24 (m, 6H), known compound.

### Scheme S1. Scope of indolines.

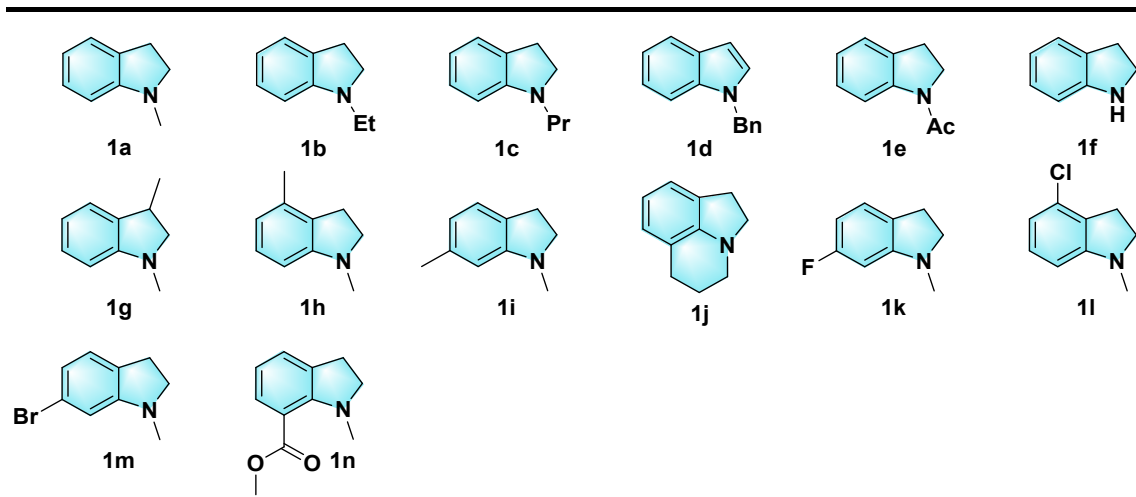

### Scheme S2. Scope of amines and *N*-containing heterocycles.

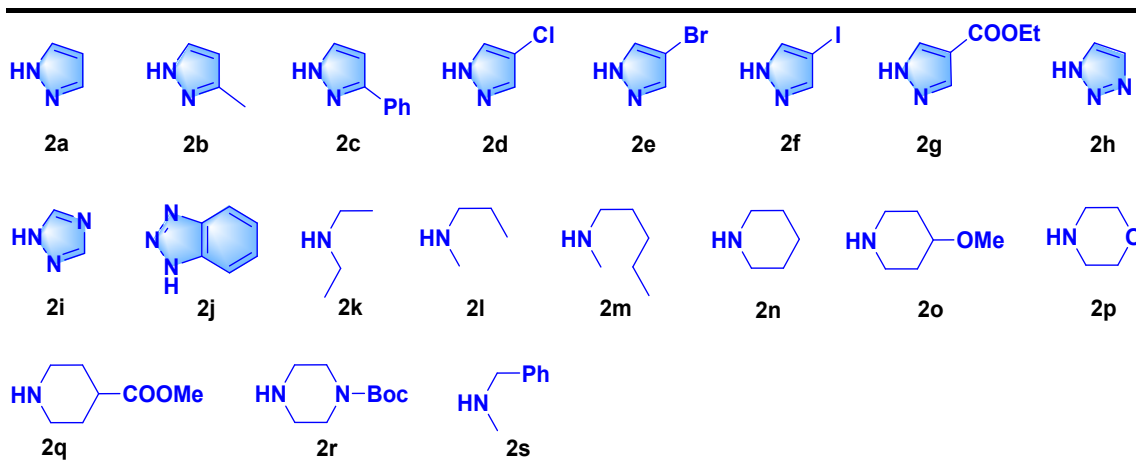

### Scheme S3. Scope of disulfides.

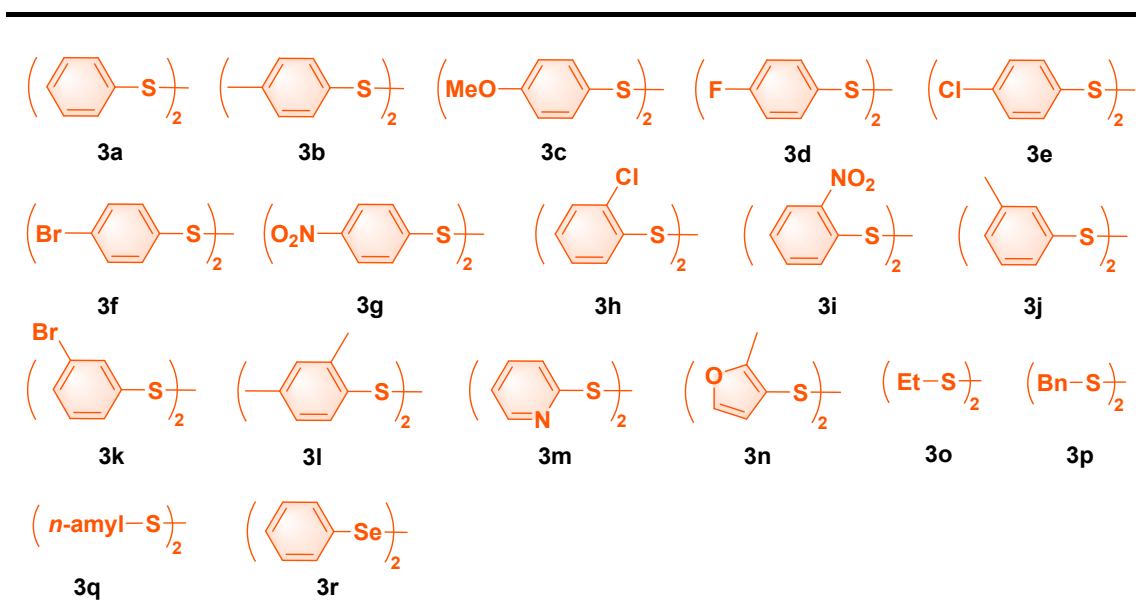

### 3. Optimization of reaction conditions.

Table S1. Optimization of the reaction conditions.<sup>a</sup>

| Entry | Catalyst          | Solvent     | 4(%) <sup>b</sup>         | 40 (%) <sup>b</sup> |
|-------|-------------------|-------------|---------------------------|---------------------|
| 1     | CuCl              | 1,4-dioxane | 43                        | -                   |
| 2     | CuBr              | 1,4-dioxane | 50                        | -                   |
| 3     | CuI               | 1,4-dioxane | 62                        | -                   |
| 4     | CuBr <sub>2</sub> | 1,4-dioxane | 59                        | -                   |
| 5     | CuI               | 1,4-dioxane | trace                     | 48 <sup>c</sup>     |
| 6     | CuI               | Other sol.  | -                         | < 48 <sup>c</sup>   |
| 7     | CuI               | Other sol.  | < 62                      | -                   |
| 8     | CuI               | DCE         | 74                        | -                   |
| 9     | CuI               | DCE         | (55, 61) <sup>d</sup>     | -                   |
| 10    | CuI               | DCE         | (64, 70) <sup>e</sup>     | -                   |
| 11    | CuI               | DCE         | (79, 93, 67) <sup>f</sup> | -                   |
| 12    | CuI               | 1,4-dioxane | -                         | 71 <sup>c,g</sup>   |

<sup>a</sup>Reaction conditions, unless specified otherwise: **1a** (0.60 mmol), **2a** (0.80 mmol), **3a** (0.20 mmol), I<sub>2</sub> (100 mol%), catalyst (20 mol%) and solvent (3.0 mL) were stirred at 80 °C under O<sub>2</sub> for 8 h. <sup>b</sup>Isolated yield. <sup>c</sup>DDQ (2.0 equiv.) were added. <sup>d</sup>At 60 °C and 100 °C. <sup>e</sup>80 mol% and 120 mol% of I<sub>2</sub>, respectively. <sup>f</sup>10 h, 12 h and 14 h of reaction time, respectively. <sup>g</sup>**1a** (0.20 mmol) and I<sub>2</sub> (30 mol%) were used.

### Details:

Table S2. Screening the catalyst of reaction.<sup>a</sup>

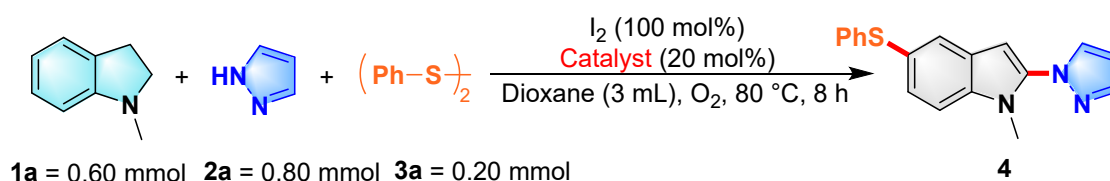

| Entry | Catalyst          | Yield (%) <sup>b</sup> |
|-------|-------------------|------------------------|
| 1     | CuCl              | 43                     |
| 2     | CuBr              | 50                     |
| 3     | <b>CuI</b>        | <b>62</b>              |
| 4     | CuCl <sub>2</sub> | 26                     |
| 5     | CuBr <sub>2</sub> | 59                     |

|   |                      |       |
|---|----------------------|-------|
| 6 | Cu(OTf) <sub>2</sub> | 17    |
| 7 | Cu(OAc) <sub>2</sub> | 23    |
| 8 | -                    | trace |

<sup>a</sup>Reaction conditions unless specified otherwise: **1a** (0.60 mmol), **2a** (0.80 mmol), **3a** (0.20 mmol), **catalyst** (20 mol%), I<sub>2</sub> (100 mol%) and 1,4-dioxane (3.0 mL) were stirred at 80 °C under O<sub>2</sub> for 8 h. <sup>b</sup>Isolated yield.

**Table S3. Screening the solvent of reaction.<sup>a</sup>**

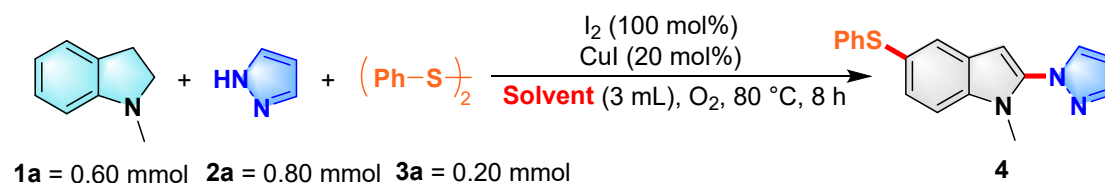

| Entry | Solvent            | Yield (%) <sup>b</sup> |
|-------|--------------------|------------------------|
| 1     | CH <sub>3</sub> CN | trace                  |
| 2     | DCE                | 74                     |
| 3     | DMF                | trace                  |
| 4     | DMSO               | 22                     |
| 5     | Toluene            | 68                     |

<sup>a</sup>Reaction conditions unless specified otherwise: **1a** (0.60 mmol), **2a** (0.80 mmol), **3a** (0.20 mmol), CuI (20 mol%), I<sub>2</sub> (100 mol%) and **solvent** (3.0 mL) were stirred at 80 °C under O<sub>2</sub> for 8 h. <sup>b</sup>Isolated yield.

**Table S4. Screening the temperature of reaction.<sup>a</sup>**

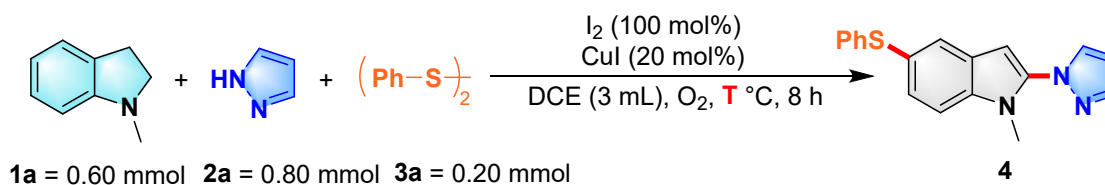

| Entry | T [°C] | Yield (%) <sup>b</sup> |
|-------|--------|------------------------|
| 1     | 60     | 55                     |
| 2     | 100    | 61                     |

<sup>a</sup>Reaction conditions unless specified otherwise: **1a** (0.60 mmol), **2a** (0.80 mmol), **3a** (0.20 mmol), CuI (20 mol%), I<sub>2</sub> (100 mol%) and 1,4-dioxane (3.0 mL) were stirred at **T** °C under O<sub>2</sub> for 8 h. <sup>b</sup>Isolated yield.

**Table S5. Screening the amount of I<sub>2</sub>.<sup>a</sup>**

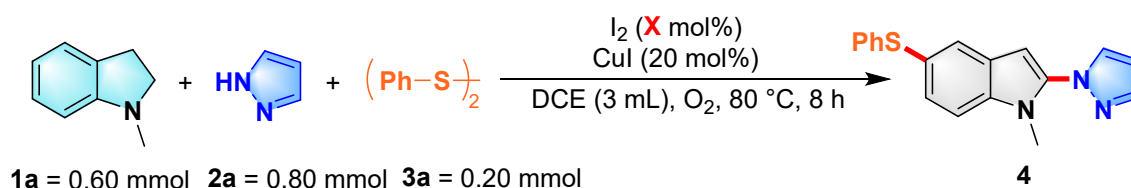



| Entry | X (mol %) | Yield (%) <sup>b</sup> |
|-------|-----------|------------------------|
| 1     | 80        | 64                     |
| 2     | 120       | 70                     |

<sup>a</sup>Reaction conditions unless specified otherwise: **1a** (0.60 mmol), **2a** (0.80 mmol), **3a** (0.20 mmol), CuI (20 mol%), I<sub>2</sub> (X mol%) and 1,4-dioxane (3.0 mL) were stirred at 80 °C under O<sub>2</sub> for 8 h. <sup>b</sup>Isolated yield.

**Table S6. Screening the amount of CuI.<sup>a</sup>**

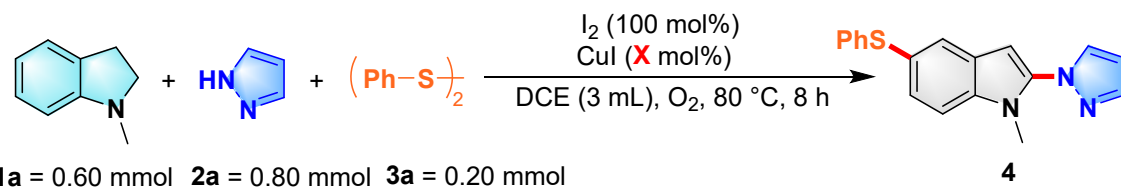

| Entry | X (mol %) | Yield (%) <sup>b</sup> |
|-------|-----------|------------------------|
| 1     | 10        | 32                     |
| 2     | 30        | 72                     |

<sup>a</sup>Reaction conditions unless specified otherwise: **1a** (0.60 mmol), **2a** (0.80 mmol), **3a** (0.20 mmol), CuI (X mol%), I<sub>2</sub> (100 mol%) and 1,4-dioxane (3.0 mL) were stirred at 80 °C under O<sub>2</sub> for 8 h. <sup>b</sup>Isolated yield.

**Table S7. Screening the reaction time.<sup>a</sup>**

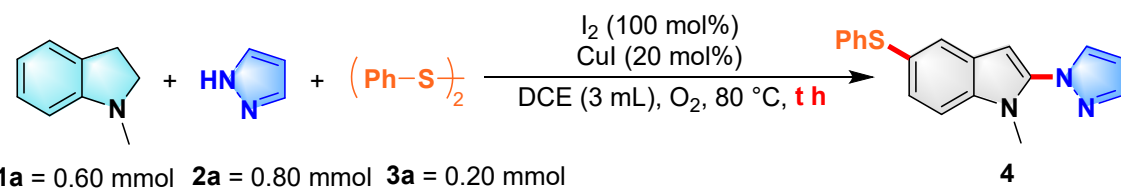

| Entry | t (h) | Yield (%) <sup>b</sup> |
|-------|-------|------------------------|
| 1     | 10    | 79                     |
| 2     | 12    | 93                     |
| 3     | 14    | 67                     |

<sup>a</sup>Reaction conditions unless specified otherwise: **1a** (0.60 mmol), **2a** (0.80 mmol), **3a** (0.20 mmol), CuI (20 mol%), I<sub>2</sub> (100 mol%) and 1,4-dioxane (3.0 mL) were stirred at 80 °C under O<sub>2</sub> for t h. <sup>b</sup>Isolated yield.

**Table S8. Screening Air and N<sub>2</sub> atmosphere.<sup>a</sup>**

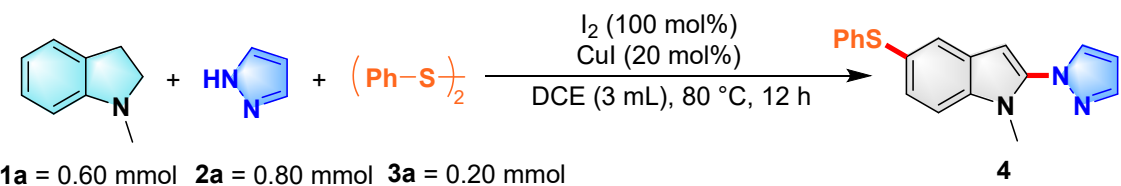

| Entry | atmosphere | Yield (%) <sup>b</sup> |
|-------|------------|------------------------|
| 1     | Air        | 47                     |

<sup>a</sup>Reaction conditions unless specified otherwise: **1a** (0.60 mmol), **2a** (0.80 mmol), **3a** (0.20 mmol), CuI (20 mol%), I<sub>2</sub> (100 mol%) and 1,4-dioxane (3.0 mL) were stirred at 80 °C under **Air** or **N<sub>2</sub>** for 12 h. <sup>b</sup>Isolated yield.

**Table S9. Screening the additives of reaction.<sup>a</sup>**

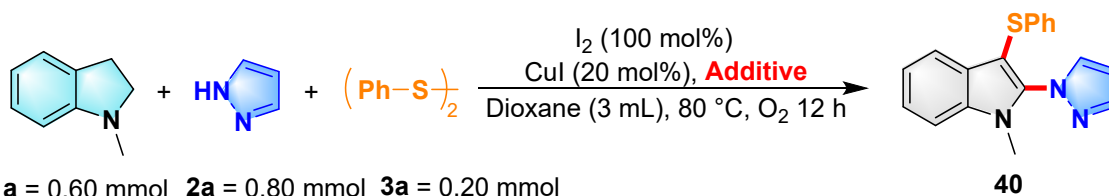

| Entry | Additives                                                 | Yield (%) <sup>b</sup> |
|-------|-----------------------------------------------------------|------------------------|
| 1     | DMSO (1 mL)                                               | trace                  |
| 2     | K <sub>2</sub> S <sub>2</sub> O <sub>8</sub> (2.0 equiv.) | trace                  |
| 3     | TBHP (2.0 equiv.)                                         | trace                  |
| 4     | <b>DDQ</b> (2.0 equiv.)                                   | <b>48</b>              |

<sup>a</sup>Reaction conditions unless specified otherwise: **1a** (0.60 mmol), **2a** (0.80 mmol), **3a** (0.20 mmol), CuI (20 mol%), I<sub>2</sub> (100 mol%), 1,4-dioxane (3.0 mL) and **additives** were stirred at 80 °C under O<sub>2</sub> for 12 h. <sup>b</sup>Isolated yield.

**Table S10. Screening the solvent of reaction.<sup>a</sup>**

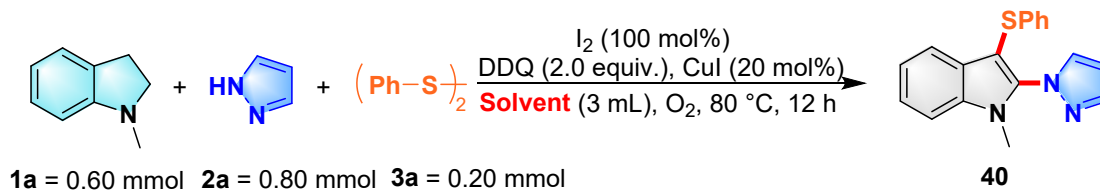

| Entry | Solvent            | Yield (%) <sup>b</sup> |
|-------|--------------------|------------------------|
| 1     | CH <sub>3</sub> CN | trace                  |
| 2     | DCE                | 24                     |
| 3     | DMF                | trace                  |
| 4     | DMSO               | trace                  |
| 5     | Toluene            | 31                     |

<sup>a</sup>Reaction conditions unless specified otherwise: **1a** (0.60 mmol), **2a** (0.80 mmol), **3a** (0.20 mmol), CuI (20 mol%), I<sub>2</sub> (100 mol%), DDQ (2.0 equiv.) and **solvent** (3.0 mL) were stirred at 80 °C under O<sub>2</sub> for 12 h. <sup>b</sup>Isolated yield.

**Table S11. Screening the amount of 1a.<sup>a</sup>**

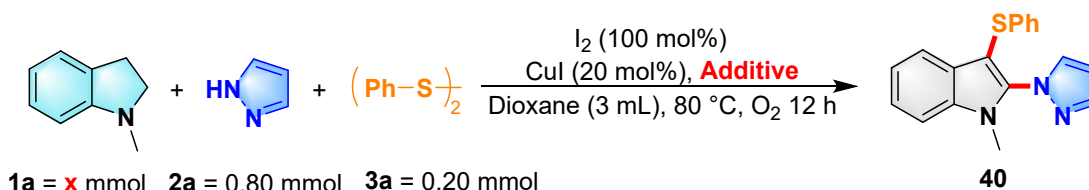

| Entry | x (mmol) | Yield (%) <sup>b</sup> |
|-------|----------|------------------------|
|-------|----------|------------------------|

|   |             |           |
|---|-------------|-----------|
| 1 | 0.50        | 53        |
| 2 | 0.40        | 56        |
| 3 | 0.30        | 60        |
| 4 | <b>0.20</b> | <b>64</b> |

<sup>a</sup>Reaction conditions unless specified otherwise: **1a** (x mmol), **2a** (0.80 mmol), **3a** (0.20 mmol), CuI (20 mol%), I<sub>2</sub> (100 mol%) DDQ (2.0 equiv.) and 1,4-dioxane (3.0 mL) were stirred at 80 °C under O<sub>2</sub> for 12 h. <sup>b</sup>Isolated yield.

**Table S12. Screening the amount of I<sub>2</sub>.<sup>a</sup>**

**1a** = 0.20 mmol   **2a** = 0.80 mmol   **3a** = 0.20 mmol

| Entry | X (mol %) | Yield (%) <sup>b</sup> |
|-------|-----------|------------------------|
| 1     | 80        | 59                     |
| 2     | 50        | 68                     |
| 3     | <b>30</b> | <b>71</b>              |
| 4     | 10        | 59                     |

<sup>a</sup>Reaction conditions unless specified otherwise: **1a** (0.20 mmol), **2a** (0.80 mmol), **3a** (0.20 mmol), CuI (20 mol%), I<sub>2</sub> (X mol%) DDQ (2.0 equiv.) and 1,4-dioxane (3.0 mL) were stirred at 80 °C under O<sub>2</sub> for 12 h. <sup>b</sup>Isolated yield.

## 4. Typical procedure for the synthesis of **4** and **40**

### (1) Typical procedure for the synthesis of **4**:

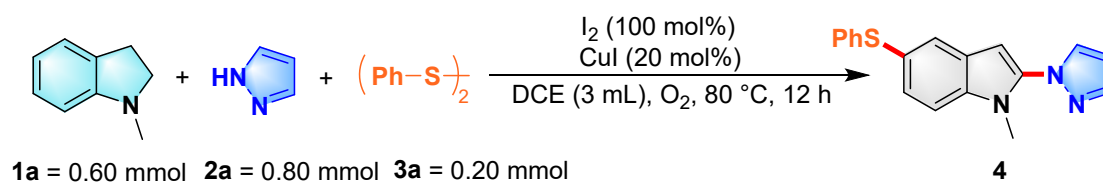

The mixture of 1-methylindoline **1a** (79.8 mg, 0.60 mmol), **2a** (54.5 mg, 0.80 mmol), **3a** (43.6 mg, 0.20 mmol), CuI (20 mol%, 7.6 mg), I<sub>2</sub> (100 mol%, 50.6 mg) and DCE (3.0 mL) were stirred at 80 °C under O<sub>2</sub> for 12 h. The resulting mixture was concentrated by removing the solvent under vacuum, and the residue was purified by preparative TLC on silica gel by using petroleum ether/acetic ether (10:1) as the eluent to give **4** as a white solid (113.5 mg, 93% yield).

### (2) Typical procedure for the synthesis of **40**:

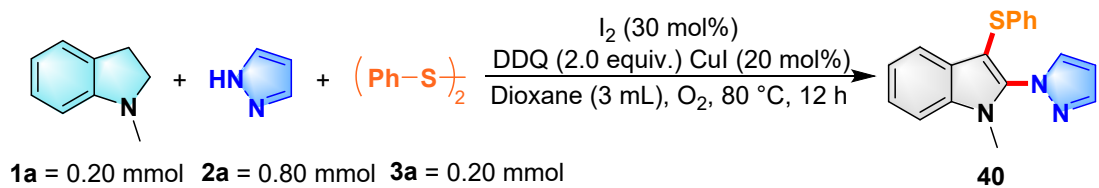

The mixture of 1-methylindoline **1a** (26.6 mg, 0.20 mmol), **2a** (54.5 mg, 0.80 mmol), **3a** (43.6 mg, 0.20 mmol), CuI (20 mol%, 7.6 mg), I<sub>2</sub> (30 mol%, 15.2 mg) DDQ (2.0 equiv., 90.8 mg) and 1,4-dioxane (3.0 mL) were stirred at 80 °C under O<sub>2</sub> for 12 h. The resulting mixture was concentrated by removing the solvent under vacuum, and the residue was purified by preparative TLC on silica gel by using petroleum ether/acetic ether (10:1) as the eluent to give **40** as a white solid (43.3 mg, 71% yield).

## 5. Control experiments.

### Scheme S4. Control experiments.

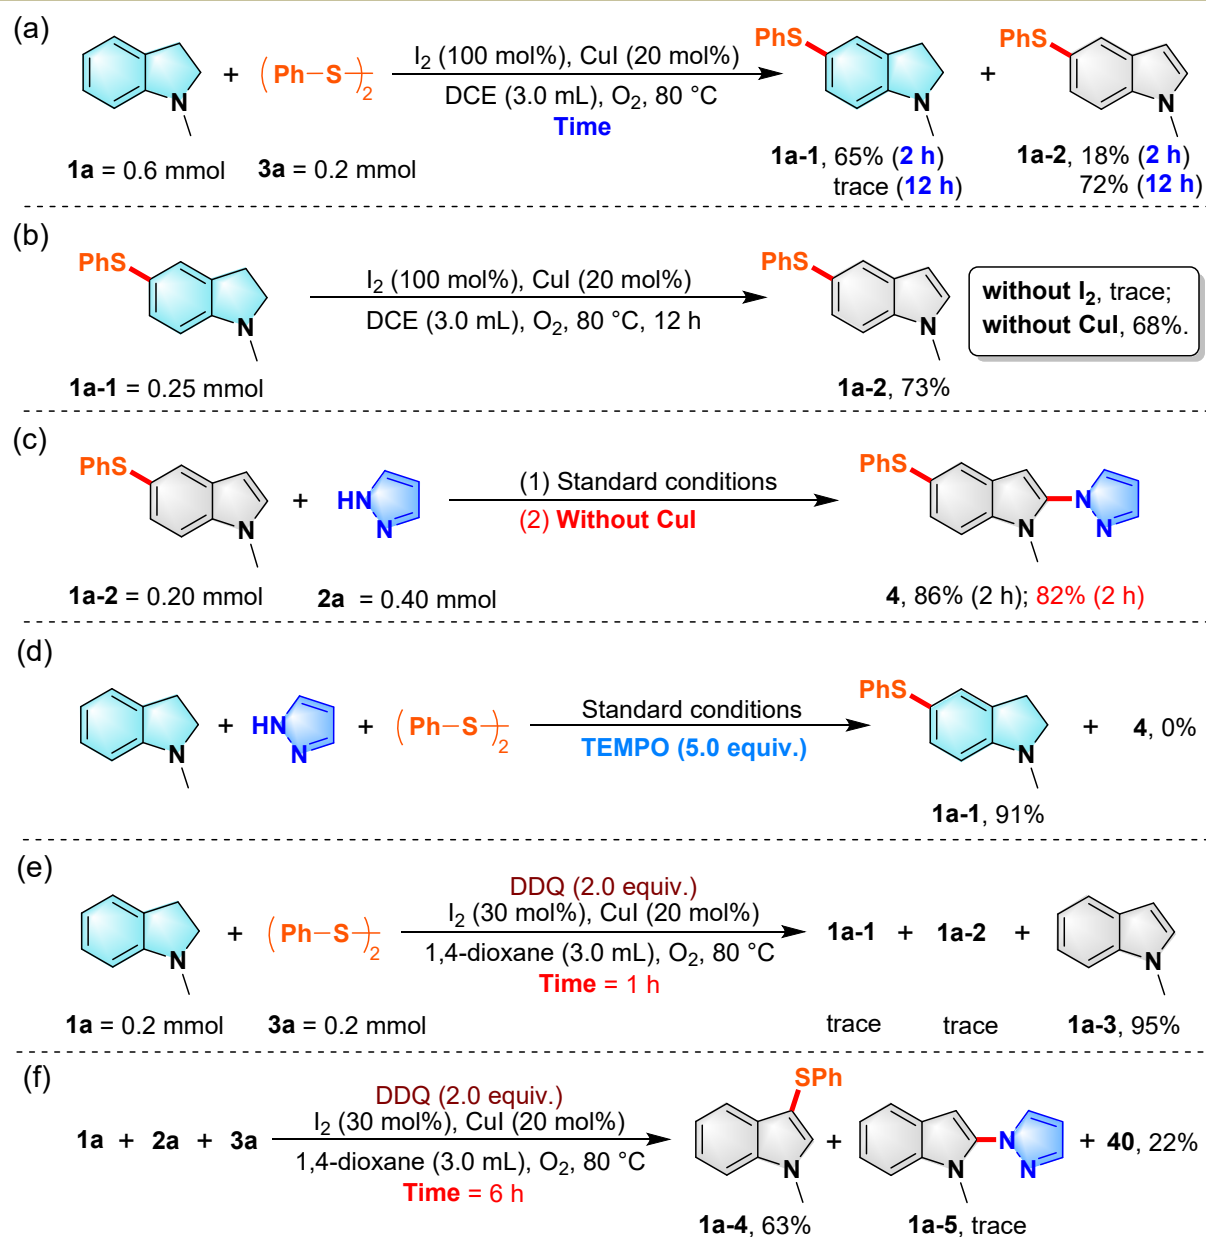

### Details:

(1) Under the optimized reaction conditions, the reaction of **1a** (79.8 mg, 0.60 mmol) and **3a** (43.6 mg, 0.20 mmol) were carried. Then, the crude reaction mixture was analyzed by TLC in 2 and 12 hours respectively. The reaction mixture (**2 h**) was purified by preparative TLC on silica eluting with petroleum ether/acetic ether (10:1) to give product **1a-1** as yellow liquid (62.7 mg, 65% yield) and **1a-2** as white solid (17.2 mg, 18% yield). The reaction mixture (**12 h**) was purified by preparative TLC on

silica eluting with petroleum ether/acetic ether (10:1) to give product **1a-2** as white solid (68.8 mg, 72% yield) and **1a-1** (trace).

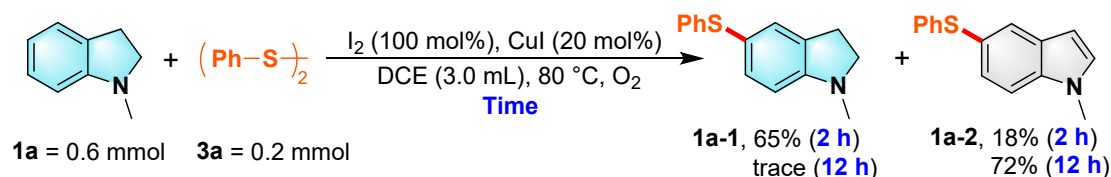

(2) Under the optimized reaction conditions, 1-methyl-5-(phenylthio)indoline **1a-1** (60.3 mg, 0.25 mmol) underwent the reaction. Then, the reaction mixture was purified by preparative TLC on silica eluting with petroleum ether/acetic ether (10:1), resulting in a yield of (73%, 43.6 mg) for product **1a-2**. It is worth noting that in the absence of iodine ( $I_2$ ), only trace amounts of product **1a-2** were obtained, while in the absence of CuI, the yield of product **1a-2** was (68%, 40.6 mg).

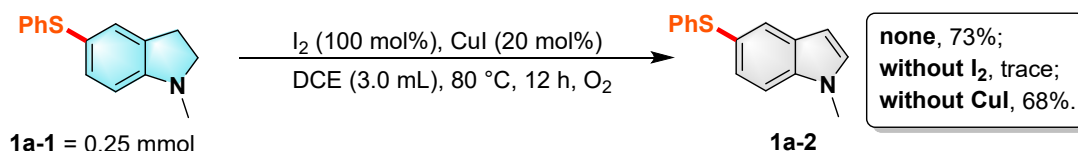

(3) Under the optimized reaction conditions, 1-methyl-5-(phenylthio)-1*H*-indole **1a-2** (47.8 mg, 0.20 mmol) and pyrazol **2a** (27.2 mg, 0.4 mmol) were reacted for 2 hours, then, the reaction mixture was purified by preparative TLC on silica eluting with petroleum ether/acetic ether (10:1), resulting in a yield of 86% for product **4** (52.5 mg). It is worth noting that in the absence of CuI, the yield of product **4** can also reach 82% (50.0 mg).

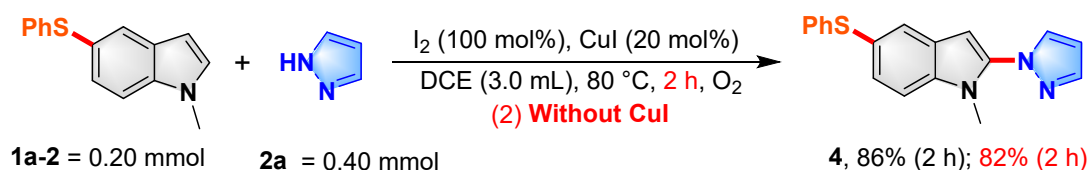

(4) Under the standard conditions, the radical trapping reagents, 2,2,6,6-tetramethyl-1-piperidinyloxy (TEMPO) was introducing to this reaction. Then, the reaction mixture was purified by preparative TLC on silica eluting with petroleum ether/acetic ether (10:1) to give product **1a-1** as yellow liquid (87.7 mg, 91% yield). However, product **4** was not obtained.



## 6. Synthetic utility.

### Scheme S5. Synthetic applications and derivatizations.

#### (a) Late-stage modification of pharmaceuticals

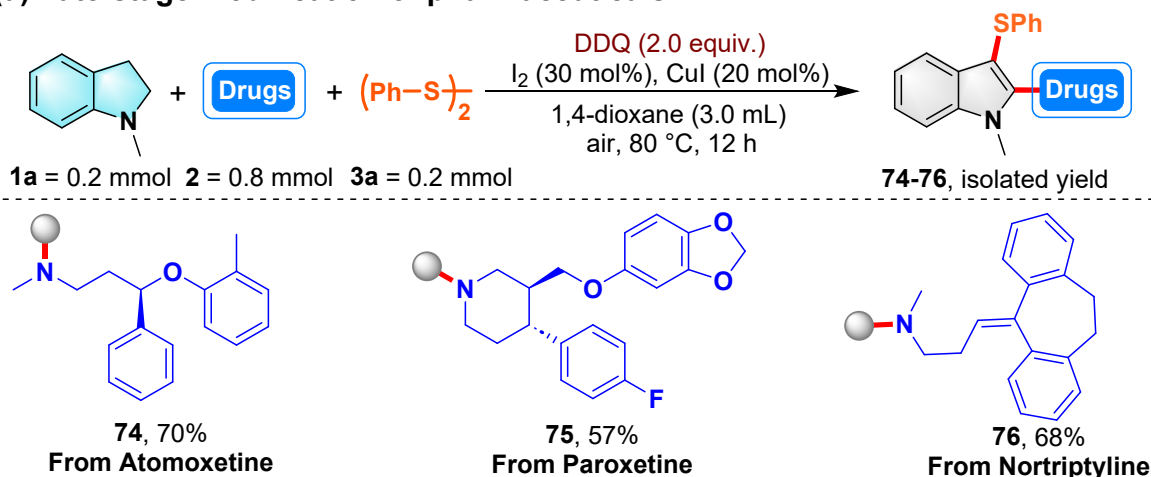

#### (b) Derivatizations of product 4

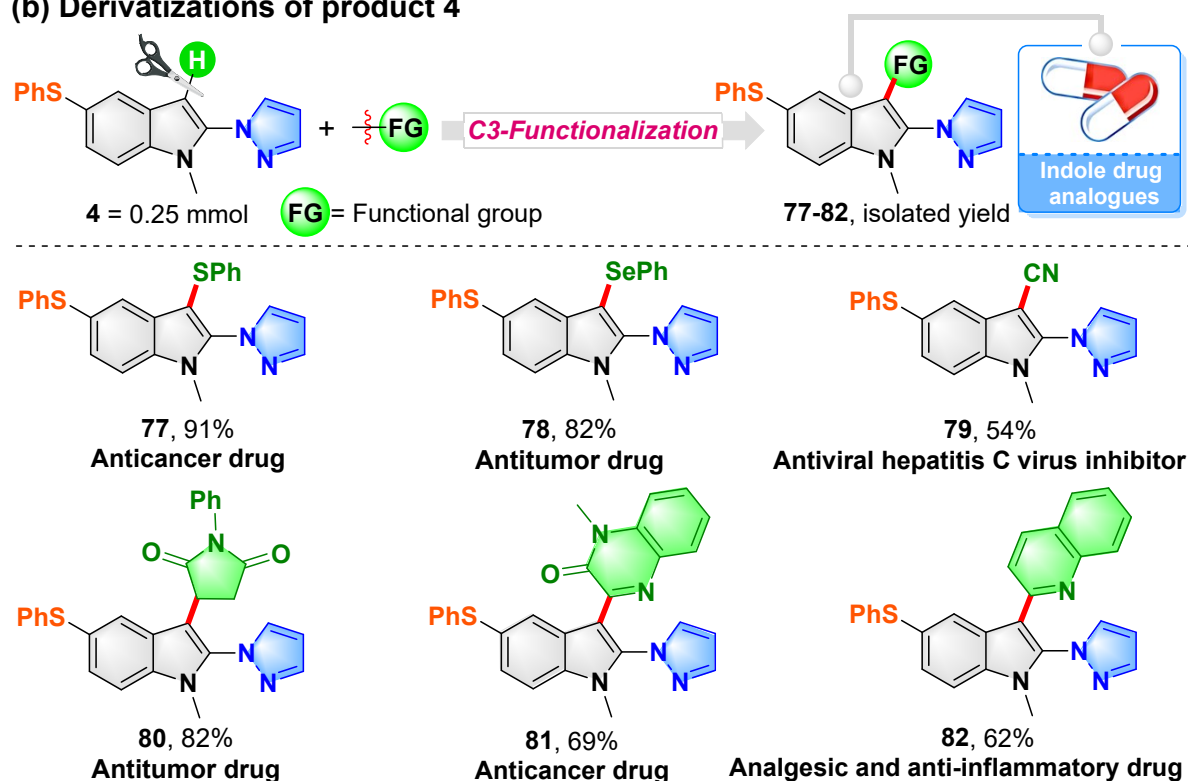

#### Details:

(1) The mixture of 1-methylindoline **1a** (26.6 mg, 0.20 mmol), drugs (0.80 mmol, including atomoxetine, paroxetine and nortriptyline), **3a** (43.6 mg, 0.20 mmol), CuI (20 mol%, 7.6 mg), I<sub>2</sub> (30 mol%, 15.2 mg) DDQ (2.0 equiv., 90.8 mg) and 1,4-dioxane (3.0 mL) were stirred at 80 °C under O<sub>2</sub>



for 12 h. The mixture obtained after solvent evaporation under vacuum was subjected to purification by thin-layer chromatography on silica gel using a eluent consisting of petroleum ether/ethyl acetate (10:1). As a result, three products, namely **74** (68.9 mg, 70%), **75** (64.5 mg, 57%), and **76** (68.0 mg, 68%), were successfully separated and isolated, respectively.

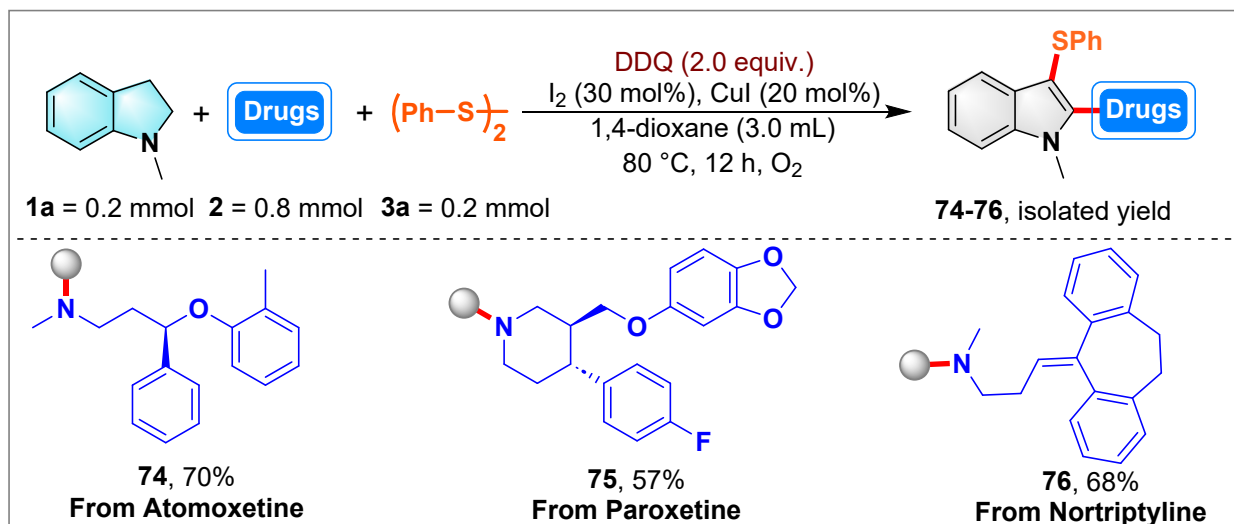

(2) To a solution of **4** (76.3 mg, 0.25 mmol) in DMSO (3.0 mL) was added 1,2-diphenyldisulfane (27.3 mg, 0.125 mmol),  $\text{I}_2$  (50 mol%, 31.6 mg). After stirring at 80 °C for 5 h, the organic layer was concentrated under reduced pressure, and the residue was purified by silica gel column chromatography using ethyl acetate /petroleum (1:10) as eluent to afford the pure product **77** as a white solid (94.0 mg, 91% yield).

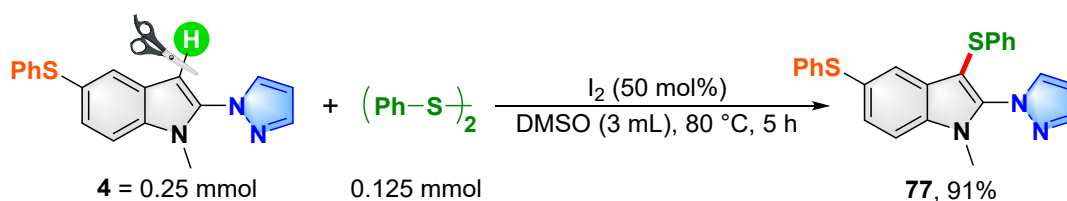

(3) To a solution of **4** (76.3 mg, 0.25 mmol) in DMSO (3.0 mL) was added 1,2-diphenyldisulfane (39.1 mg, 0.125 mmol),  $\text{I}_2$  (50 mol%, 31.6 mg). After stirring at 80 °C for 5 h, the organic layer was concentrated under reduced pressure, and the residue was purified by silica gel column chromatography using ethyl acetate /petroleum (1:10) as eluent to afford the pure product **78** as a white solid (94.5 mg, 82% yield).

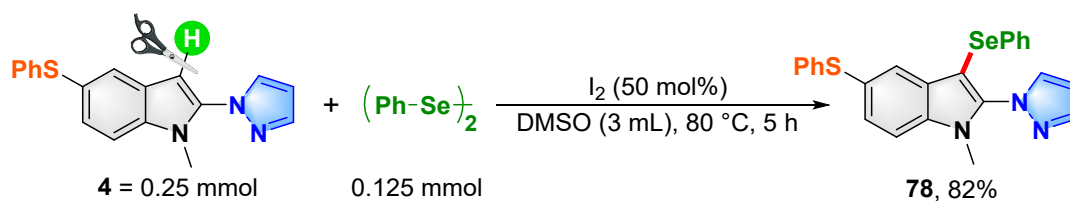

(4) To a solution of **4** (76.3 mg, 0.25 mmol) in DMF (1.5 mL) was added ethyl carbonocyanide (37.1 mg, 0.375 mmol), NaOTf (60 mol%, 25.8 mg) and Cu(OTf)<sub>2</sub> (60 mol%, 54.3 mg). After stirring at 130 °C for 24 h under O<sub>2</sub>, the organic layer was concentrated under reduced pressure, and the residue was purified by silica gel column chromatography using ethyl acetate /petroleum (1:10) as eluent to afford the pure product **79** as a white solid (44.6 mg, 54% yield).

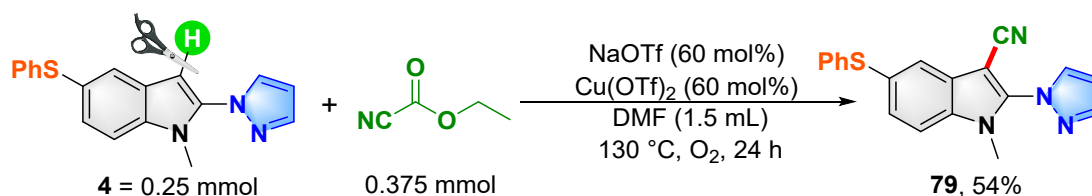

(5) To a solution of **4** (76.3 mg, 0.25 mmol) in DCE (3.0 mL) was added 1-phenyl-1*H*-pyrrole-2,5-dione (64.9 mg, 0.375 mmol) and AlCl<sub>3</sub> (150 mol%, 50.0 mg). After stirring at 80 °C for 8 h under air the organic layer was concentrated under reduced pressure, and the residue was purified by silica gel column chromatography using ethyl acetate /petroleum (1:10) as eluent to afford the pure product **80** as a yellow solid (98.0 mg, 82% yield).

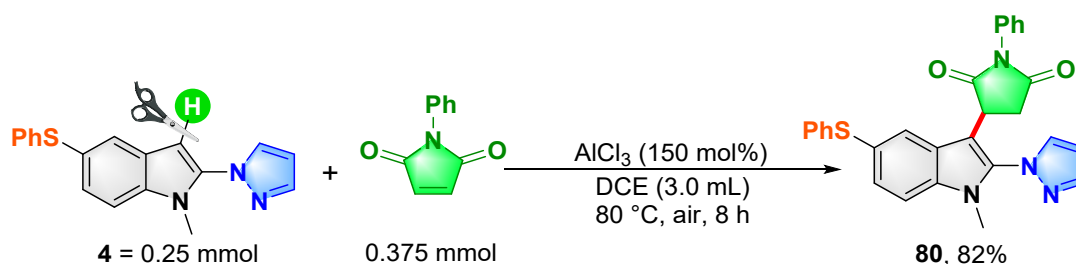

(6) To a solution of **4** (76.3 mg, 0.25 mmol) in EA (3.0 mL) was added 1-methylquinoxalin-2(1*H*)-one (40.0 mg, 0.25 mmol) and CuF<sub>2</sub> (10 mol%, 2.5 mg). After stirring at 60 °C for 6 h under air the organic layer was concentrated under reduced pressure, and the residue was purified by silica gel column chromatography using ethyl acetate/petroleum (1:5) as eluent to afford the pure product **81** as a yellow solid (79.9 mg, 82% yield).

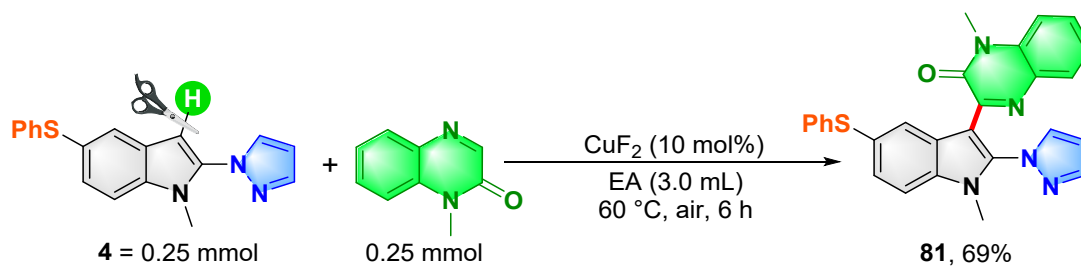

(7) To a solution of **4** (76.3 mg, 0.25 mmol) in DCE (3.0 mL) was added 2-chloroquinoline (40.8 mg, 0.25 mmol) and  $\text{AlCl}_3$  (100 mol%, 33.3 mg). After stirring at 80 °C for 8 h under air the organic layer was concentrated under reduced pressure, and the residue was purified by silica gel column chromatography using ethyl acetate /petroleum (1:10) as eluent to afford the pure product **82** as a white solid (67.0 mg, 62% yield).

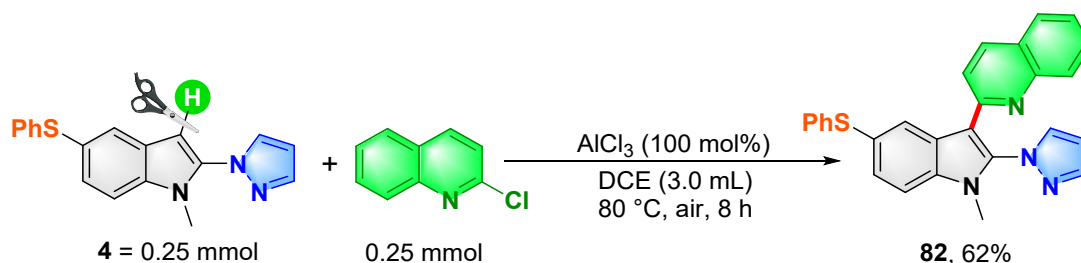

## 7. Single crystal X-ray diffraction

### (1) Single crystal X-ray diffraction of **10**

White block-like single crystals of **10** were grown by layering a dichloromethane solution with *n*-hexane at ambient temperature. X-Ray diffraction data of one these crystals were collected on a R-AXIS SPIDER diffractometer. The measurements were performed with Mo- $K\alpha$  radiation ( $\lambda = 0.71073 \text{ \AA}$ ). Data were collected at 293(2) K, using the  $\omega$ - and  $\varphi$ - scans to a maximum  $\theta$  value of 25.242°. The data were refined by full-matrix least-squares techniques on  $F^2$  with SHELXTL-2014. And the structures were solved by direct methods SHELXS-2014. All the non-hydrogen atoms were refined anisotropically. The hydrogen atoms were included at geometrically idealized positions. And an ORTEP representation of the structure is shown below.

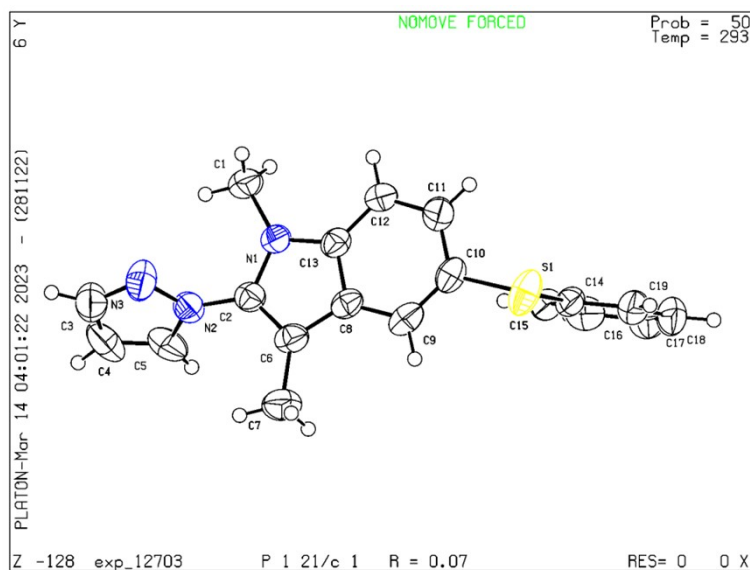

**Figure S1.** ORTEP drawing of **10** with the numbering scheme.

**Table S13.** Crystal data and structure refinement for **10**

|                                       |                                                             |                               |
|---------------------------------------|-------------------------------------------------------------|-------------------------------|
| Identification code                   | 10                                                          |                               |
| Empirical formula                     | $C_{19}H_{17}N_3S$                                          |                               |
| Formula weight                        | 319.41                                                      |                               |
| Temperature                           | 293(2) K                                                    |                               |
| Crystal system                        | Monoclinic                                                  |                               |
| Space group                           | $P2_1/c$                                                    |                               |
| Unit cell dimensions                  | $a = 7.7135(7) \text{ \AA}$                                 | $\alpha = 90^\circ$ .         |
|                                       | $b = 22.940(2) \text{ \AA}$                                 | $\beta = 100.290(11)^\circ$ . |
|                                       | $c = 9.6284(11) \text{ \AA}$                                | $\gamma = 90^\circ$ .         |
| Volume                                | $1821.5(3) \text{ \AA}^3$                                   |                               |
| Z                                     | 4                                                           |                               |
| F(000)                                | 672.0                                                       |                               |
| Crystal size                          | 0.20x 0.14 x 0.10 mm <sup>3</sup>                           |                               |
| 2 $\theta$ range for data collection  | 7.106 to 58.88                                              |                               |
| Index ranges                          | $-10 \leq h \leq 7, -31 \leq k \leq 30, -11 \leq l \leq 13$ |                               |
| Reflections collected                 | 8754                                                        |                               |
| Independent reflections               | 3848 [Rint = 0.0410, Rsigma = 0.0634]                       |                               |
| Data / restraints / parameters        | 3848/0/210                                                  |                               |
| Goodness-of-fit on F <sup>2</sup>     | 1.041                                                       |                               |
| Final R indices [I >= 2 $\sigma$ (I)] | R1 = 0.0707, wR2 = 0.1590                                   |                               |
| Final R indices (all data)            | R1 = 0.1152, wR2 = 0.1860                                   |                               |
| Largest diff. peak and hole           | 0.47/-0.37 e. $\text{\AA}^{-3}$                             |                               |

**Table S14.** Fractional Atomic Coordinates ( $\times 10^4$ ) and Equivalent Isotropic Displacement Parameters  
S20

( $\text{\AA}^2 \times 10^3$ ) for **10**.  $U(\text{eq})$  is defined as 1/3 of the trace of the orthogonalised  $U^{ij}$  tensor.

| Atom | x          | y          | z         | U(eq)    |
|------|------------|------------|-----------|----------|
| S1   | 2025.1(10) | 1598.5(4)  | 5914.8(8) | 67.0(3)  |
| N1   | 6682(3)    | 3143.0(10) | 3387(2)   | 45.6(6)  |
| N2   | 6600(3)    | 4191.6(10) | 3140(3)   | 49.5(6)  |
| N3   | 8244(3)    | 4385.3(12) | 3733(3)   | 67.7(7)  |
| C2   | 5925(3)    | 3675.0(12) | 3607(3)   | 44.7(6)  |
| C14  | 516(3)     | 1322.7(12) | 4458(3)   | 44.9(6)  |
| C8   | 4388(3)    | 2991.6(13) | 4477(3)   | 45.5(7)  |
| C15  | 373(3)     | 1520.5(13) | 3089(3)   | 48.8(7)  |
| C13  | 5737(3)    | 2718.1(12) | 3916(3)   | 44.7(6)  |
| C6   | 4513(3)    | 3606.7(13) | 4269(3)   | 49.4(7)  |
| C9   | 3231(3)    | 2640.1(14) | 5093(3)   | 52.2(7)  |
| C12  | 5959(4)    | 2114.8(13) | 3934(3)   | 55.6(8)  |
| C19  | -614(4)    | 886.2(13)  | 4763(4)   | 57.8(8)  |
| C10  | 3435(3)    | 2051.4(14) | 5115(3)   | 51.1(7)  |
| C11  | 4806(4)    | 1787.2(14) | 4535(3)   | 58.0(8)  |
| C1   | 8190(4)    | 3045.4(14) | 2687(4)   | 59.7(8)  |
| C5   | 5794(5)    | 4566.4(14) | 2160(4)   | 66.9(9)  |
| C16  | -885(4)    | 1285.9(14) | 2035(3)   | 61.3(8)  |
| C18  | -1863(4)   | 658.3(15)  | 3705(4)   | 69.7(9)  |
| C3   | 8400(5)    | 4885.8(16) | 3095(4)   | 73.3(10) |
| C17  | -2021(4)   | 858.8(16)  | 2345(4)   | 71.0(10) |
| C4   | 6917(6)    | 5015.2(14) | 2109(4)   | 78.6(11) |
| C7   | 3359(4)    | 4068.3(16) | 4690(4)   | 77.4(11) |

**Table S14.** Anisotropic Displacement Parameters ( $\text{\AA}^2 \times 10^3$ ) for **10**. The Anisotropic displacement factor exponent takes the form:  $-2\pi^2[h^2a^*U_{11}+2hka^*b^*U_{12}+\dots]$ .

| Atom | U <sub>11</sub> | U <sub>22</sub> | U <sub>33</sub> | U <sub>23</sub> | U <sub>13</sub> | U <sub>12</sub> |
|------|-----------------|-----------------|-----------------|-----------------|-----------------|-----------------|
| S1   | 54.7(5)         | 99.1(7)         | 45.1(5)         | 13.1(4)         | 2.9(3)          | -26.6(5)        |
| N1   | 39.4(11)        | 45.8(13)        | 52.8(14)        | 4.7(11)         | 11.6(10)        | 2.9(10)         |
| N2   | 49.0(13)        | 43.3(13)        | 54.9(14)        | -1.8(11)        | 6.2(11)         | 0.4(11)         |
| N3   | 58.7(16)        | 67.7(18)        | 75.8(18)        | 4.9(15)         | 9.6(14)         | -18.2(14)       |
| C2   | 40.5(13)        | 45.7(16)        | 45.5(15)        | -1.5(13)        | 1.3(12)         | 2.0(12)         |
| C14  | 35.7(13)        | 49.0(15)        | 50.1(16)        | 2.4(13)         | 7.5(11)         | -0.9(12)        |
| C8   | 33.7(12)        | 57.9(18)        | 42.7(15)        | -5.4(13)        | 1.1(11)         | -1.0(12)        |
| C15  | 44.3(14)        | 54.0(17)        | 48.1(16)        | 3.4(13)         | 8.5(13)         | 0.3(13)         |
| C13  | 35.2(13)        | 50.9(16)        | 47.0(15)        | 2.1(13)         | 4.5(12)         | 0.0(12)         |
| C6   | 39.8(14)        | 57.3(18)        | 50.0(16)        | -12.1(14)       | 5.1(12)         | 2.8(13)         |
| C9   | 38.0(14)        | 76(2)           | 43.2(15)        | -7.7(15)        | 9.6(12)         | -3.4(14)        |

|     |          |          |          |           |          |           |
|-----|----------|----------|----------|-----------|----------|-----------|
| C12 | 44.4(15) | 51.7(18) | 74(2)    | 3.4(15)   | 20.1(14) | 6.7(14)   |
| C19 | 53.1(17) | 55.3(18) | 67(2)    | 7.2(15)   | 16.2(15) | -3.3(15)  |
| C10 | 39.7(14) | 66(2)    | 46.0(16) | -0.2(14)  | 3.1(12)  | -10.9(14) |
| C11 | 49.3(16) | 53.6(18) | 71(2)    | 5.5(15)   | 9.4(15)  | -3.5(15)  |
| C1  | 52.4(17) | 59.2(18) | 73(2)    | 5.8(16)   | 27.7(16) | 7.9(15)   |
| C5  | 80(2)    | 47.1(18) | 69(2)    | 3.8(16)   | -1.0(18) | 18.3(17)  |
| C16 | 60.5(18) | 69(2)    | 52.2(18) | -6.6(16)  | 4.1(15)  | 7.2(17)   |
| C18 | 61(2)    | 59(2)    | 92(3)    | -13.6(19) | 18.8(19) | -19.2(17) |
| C3  | 79(2)    | 59(2)    | 90(3)    | -9(2)     | 36(2)    | -15.7(19) |
| C17 | 56.6(19) | 75(2)    | 77(2)    | -23(2)    | 0.6(17)  | -6.4(18)  |
| C4  | 121(3)   | 37.2(17) | 83(3)    | 4.5(17)   | 33(2)    | 8(2)      |
| C7  | 62(2)    | 70(2)    | 104(3)   | -22(2)    | 26(2)    | 7.8(18)   |

**Table S16.** Bond Lengths for **10**.

| Atom | Atom | Length/Å | Atom | Atom | Length/Å |
|------|------|----------|------|------|----------|
| S1   | C14  | 1.772(3) | C8   | C6   | 1.431(4) |
| S1   | C10  | 1.776(3) | C8   | C9   | 1.410(4) |
| N1   | C2   | 1.386(3) | C15  | C16  | 1.382(4) |
| N1   | C13  | 1.369(3) | C13  | C12  | 1.394(4) |
| N1   | C1   | 1.461(3) | C6   | C7   | 1.486(4) |
| N2   | N3   | 1.368(3) | C9   | C10  | 1.359(4) |
| N2   | C2   | 1.401(3) | C12  | C11  | 1.368(4) |
| N2   | C5   | 1.344(4) | C19  | C18  | 1.374(4) |
| N3   | C3   | 1.318(4) | C10  | C11  | 1.418(4) |
| C2   | C6   | 1.365(4) | C5   | C4   | 1.352(5) |
| C14  | C15  | 1.380(4) | C16  | C17  | 1.382(4) |
| C14  | C19  | 1.393(4) | C18  | C17  | 1.372(5) |
| C8   | C13  | 1.403(4) | C3   | C4   | 1.382(5) |

**Table S17.** Bond Angles for **10**.

| Atom | Atom | Atom | Angle/°    | Atom | Atom | Atom | Angle/°  |
|------|------|------|------------|------|------|------|----------|
| C14  | S1   | C10  | 103.42(13) | N1   | C13  | C12  | 129.7(2) |
| C2   | N1   | C1   | 126.7(2)   | C12  | C13  | C8   | 122.4(3) |
| C13  | N1   | C2   | 107.6(2)   | C2   | C6   | C8   | 104.9(2) |
| C13  | N1   | C1   | 125.7(2)   | C2   | C6   | C7   | 127.8(3) |
| N3   | N2   | C2   | 120.7(2)   | C8   | C6   | C7   | 127.3(3) |
| C5   | N2   | N3   | 111.3(3)   | C10  | C9   | C8   | 119.6(3) |
| C5   | N2   | C2   | 127.9(3)   | C11  | C12  | C13  | 117.6(3) |
| C3   | N3   | N2   | 104.1(3)   | C18  | C19  | C14  | 120.0(3) |
| N1   | C2   | N2   | 120.3(2)   | C9   | C10  | S1   | 120.7(2) |

|            |            |            |          |            |            |            |          |
|------------|------------|------------|----------|------------|------------|------------|----------|
| <b>C6</b>  | <b>C2</b>  | <b>N1</b>  | 111.3(2) | <b>C9</b>  | <b>C10</b> | <b>C11</b> | 120.7(3) |
| <b>C6</b>  | <b>C2</b>  | <b>N2</b>  | 128.4(3) | <b>C11</b> | <b>C10</b> | <b>S1</b>  | 118.6(2) |
| <b>C15</b> | <b>C14</b> | <b>S1</b>  | 124.6(2) | <b>C12</b> | <b>C11</b> | <b>C10</b> | 121.2(3) |
| <b>C15</b> | <b>C14</b> | <b>C19</b> | 119.4(3) | <b>N2</b>  | <b>C5</b>  | <b>C4</b>  | 107.1(3) |
| <b>C19</b> | <b>C14</b> | <b>S1</b>  | 115.9(2) | <b>C15</b> | <b>C16</b> | <b>C17</b> | 120.4(3) |
| <b>C13</b> | <b>C8</b>  | <b>C6</b>  | 108.3(2) | <b>C17</b> | <b>C18</b> | <b>C19</b> | 120.7(3) |
| <b>C13</b> | <b>C8</b>  | <b>C9</b>  | 118.4(3) | <b>N3</b>  | <b>C3</b>  | <b>C4</b>  | 111.9(3) |
| <b>C9</b>  | <b>C8</b>  | <b>C6</b>  | 133.4(3) | <b>C18</b> | <b>C17</b> | <b>C16</b> | 119.5(3) |
| <b>C14</b> | <b>C15</b> | <b>C16</b> | 120.0(3) | <b>C5</b>  | <b>C4</b>  | <b>C3</b>  | 105.6(3) |
| <b>N1</b>  | <b>C13</b> | <b>C8</b>  | 107.8(2) |            |            |            |          |

**Table S18.** Hydrogen Atom Coordinates ( $\text{\AA}\times 10^4$ ) and Isotropic Displacement Parameters ( $\text{\AA}^2\times 10^3$ ) for **10**.

| <b>Atom</b> | <b>x</b> | <b>y</b> | <b>z</b> | <b>U(eq)</b> |
|-------------|----------|----------|----------|--------------|
| <b>H15</b>  | 1123.35  | 1811.53  | 2875.84  | 59           |
| <b>H9</b>   | 2333.37  | 2810.05  | 5482.77  | 63           |
| <b>H12</b>  | 6857.25  | 1941.25  | 3552.46  | 67           |
| <b>H19</b>  | -523.11  | 749.09   | 5681.76  | 69           |
| <b>H11</b>  | 4925.52  | 1383.77  | 4563.11  | 70           |
| <b>H1A</b>  | 8524.51  | 3406.87  | 2307.62  | 89           |
| <b>H1B</b>  | 7874.65  | 2768.84  | 1935.92  | 89           |
| <b>H1C</b>  | 9159.95  | 2896.26  | 3357.75  | 89           |
| <b>H5</b>   | 4674.06  | 4524.98  | 1620.01  | 80           |
| <b>H16</b>  | -967.34  | 1416.13  | 1110.72  | 74           |
| <b>H18</b>  | -2608.44 | 364.95   | 3912.88  | 84           |
| <b>H3</b>   | 9391.02  | 5123.58  | 3285.97  | 88           |
| <b>H17</b>  | -2885.92 | 708.63   | 1638.52  | 85           |
| <b>H4</b>   | 6730.45  | 5342.44  | 1531.41  | 94           |
| <b>H7A</b>  | 3784.03  | 4443.96  | 4466.49  | 116          |
| <b>H7B</b>  | 3368.46  | 4044.28  | 5686.41  | 116          |
| <b>H7C</b>  | 2177.32  | 4014.98  | 4187.58  | 116          |

## 8. Plausible reaction pathways

### Scheme S6. C2,3-aminochalcogenation pathways.

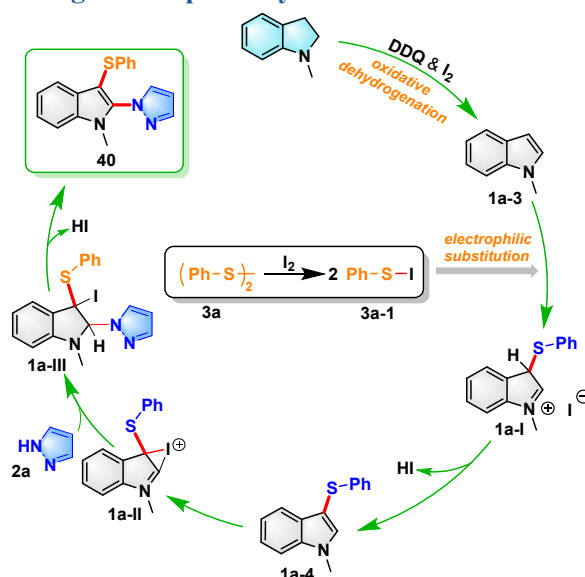

Based on the control experiments results and related studies, the following reaction pathways are proposed. Initially, 1-methylindoline **1a** is converted to 1-methyl-1*H*-indole **1a-3** through rapid oxidative dehydrogenation in the presence of DDQ and I<sub>2</sub>. The regio-selectively electrophilic addition of the 1-methyl-1*H*-indole **1a-3** at C3 position by **3a-1** (generating *via* the reaction of **3a** and I<sub>2</sub>) generated of the intermediate **1a-I**, followed by reductive elimination of HI affords the product **1a-4**, which then reacts with I<sub>2</sub>, leading to the formation of the corresponding iodonium **1a-II**. Nucleophilic attack of pyrazol **2a** at the C2 position of **1-II** yields the formation of **1a-III**. Finally, reductive elimination of intermediate **1-III** produces the target product **40** while liberating HI.

## 9. Reference.

1. H. Y. Li, J. Y. Jie, S. X. Wu, X. B. Yang and H. Xu, Rh(III)-Catalyzed direct C-7 amination of indolines with anthranils. *Org. Chem. Front.*, 2017, **4**, 250–254.
2. W. S. Ouyang, X. Q. Cai, X. J. Chen, J. Wang, J. H. Rao, Y. Gao, Y. P. Huo, Q. Chen and X. W. Li, Sequential C–H activation enabled expedient delivery of polyfunctional arenes. *Chem. Commun.*, 2021, **57**, 8075–8078.
3. D. Singh, A. M. Deobald and L. R. S. Camargo, Tabarelli, G.; Rodrigues, O. E. D.; Braga, A. L. An Efficient One-Pot Synthesis of Symmetrical Diselenides or Ditellurides from Halides with CuO Nanopowder/Se<sup>0</sup> or Te<sup>0</sup>/Base. *Org. Lett.*, 2010, **12**, 3288–3291.



## 10. Analytic data of the obtained compounds.

### (1) 1-methyl-5-(phenylthio)indoline (1a-1)

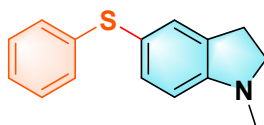

Yellow liquid,  $^1\text{H-NMR}$  (600 MHz, Chloroform-*d*)  $\delta$  7.31 (d,  $J = 8.0$  Hz, 1H), 7.25–7.22 (m, 3H), 7.17–7.15 (m, 2H), 7.11 (d,  $J = 7.3$  Hz, 1H), 6.47 (d,  $J = 8.1$  Hz, 1H), 3.41 (t,  $J = 8.3$  Hz, 2H), 2.98 (t,  $J = 8.3$  Hz, 2H), 2.83 (s, 3H).  $^{13}\text{C-NMR}$  (151 MHz, Chloroform-*d*)  $\delta$  153.96, 140.48, 135.02, 131.70, 131.00, 128.75, 126.95, 124.99, 118.66, 107.21, 55.83, 35.58, 28.35. **HRMS (ESI):** Calcd. for  $\text{C}_{15}\text{H}_{15}\text{NS}$   $[\text{M}+\text{H}]^+$ : 242.0925; found: 242.0919.

### (2) 1-methyl-5-(phenylthio)-1*H*-indole (1a-2)

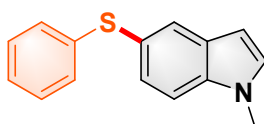

Known compound,  $^1\text{H-NMR}$  (600 MHz, Chloroform-*d*)  $\delta$  7.92 (s, 1H), 7.43 (d,  $J = 6.9$  Hz, 1H), 7.37 (d,  $J = 8.5$  Hz, 1H), 7.28–7.24 (m, 2H), 7.24–7.21 (m, 2H), 7.16 (t,  $J = 7.2$  Hz, 1H), 7.13 (d,  $J = 3.1$  Hz, 1H), 6.54 (d,  $J = 3.0$  Hz, 1H), 3.84 (s, 3H).  $^{13}\text{C-NMR}$  (151 MHz, Chloroform-*d*)  $\delta$  140.04, 136.65, 129.86, 129.48, 128.84, 127.92, 127.75, 127.56, 125.27, 122.33, 110.38, 101.25, 33.03.

### (3) 1-methyl-3-(phenylthio)-1*H*-indole (1a-4)

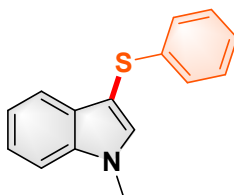

Known compound,  $^1\text{H-NMR}$  (600 MHz, Chloroform-*d*)  $\delta$  7.68 (d,  $J = 7.9$  Hz, 1H), 7.44 (d,  $J = 8.2$  Hz, 1H), 7.37 (s, 1H), 7.35 (d,  $J = 7.3$  Hz, 1H), 7.21 (ddt,  $J = 13.2, 7.2, 3.4$  Hz, 3H), 7.18–7.15 (m, 2H), 7.10 (t,  $J = 7.2$  Hz, 1H), 3.87 (s, 3H).  $^{13}\text{C-NMR}$  (151 MHz, Chloroform-*d*)  $\delta$  139.73, 137.60, 135.12, 129.89, 128.71, 125.78, 124.72, 122.62, 120.55, 119.78, 109.79, 100.54, 33.17.

**(4) 1-methyl-5-(phenylthio)-2-(1H-pyrazol-1-yl)-1H-indole (4)**

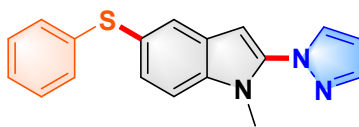

White solid, (113.5 mg, 93% yield), m.p.: 137-138 °C, <sup>1</sup>H-NMR (600 MHz, Chloroform-*d*) δ 7.86 (s, 2H), 7.78 (d, *J* = 2.3 Hz, 1H), 7.46 (d, *J* = 8.5 Hz, 1H), 7.39 (d, *J* = 8.5 Hz, 1H), 7.25 (t, *J* = 7.7 Hz, 2H), 7.23–7.19 (m, 2H), 7.15 (t, *J* = 7.2 Hz, 1H), 6.53 (s, 1H), 6.52 (t, *J* = 2.1 Hz, 1H), 3.74 (s, 3H). <sup>13</sup>C-NMR (151 MHz, Chloroform-*d*) δ 142.10, 139.46, 136.53, 135.59, 132.33, 128.88, 128.69, 127.89, 127.34, 126.98, 125.50, 124.00, 110.83, 107.09, 95.82, 30.28. Calcd. for C<sub>18</sub>H<sub>15</sub>N<sub>3</sub>S [M+H]<sup>+</sup>: 306.1059; found: 306.1048.

**(5) 1-ethyl-5-(phenylthio)-2-(1H-pyrazol-1-yl)-1H-indole (5)**

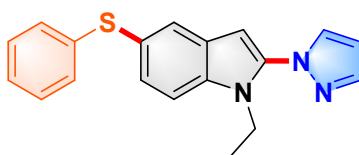

Yellow liquid, (97.0 mg, 76% yield), <sup>1</sup>H-NMR (600 MHz, Chloroform-*d*) δ 7.90 (d, *J* = 1.7 Hz, 1H), 7.88 (d, *J* = 1.8 Hz, 1H), 7.78 (d, *J* = 2.4 Hz, 1H), 7.47 (d, *J* = 6.9 Hz, 1H), 7.43 (d, *J* = 8.5 Hz, 1H), 7.29–7.25 (m, 4H), 7.18 (d, *J* = 6.8 Hz, 1H), 6.54 (s, 1H), 6.53 (t, *J* = 2.1 Hz, 1H), 4.23 (q, *J* = 7.2 Hz, 2H), 1.38 (t, *J* = 7.2 Hz, 3H). <sup>13</sup>C-NMR (151 MHz, Chloroform-*d*) δ 142.07, 139.50, 135.99, 134.56, 132.41, 128.94, 128.63, 127.96, 127.48, 127.21, 125.55, 123.88, 110.99, 107.06, 96.14, 38.75, 15.31. Calcd. for C<sub>19</sub>H<sub>17</sub>N<sub>3</sub>S [M+H]<sup>+</sup>: 320.1216; found: 320.1208.

**(6) 5-(phenylthio)-1-propyl-2-(1H-pyrazol-1-yl)-1H-indole (6)**

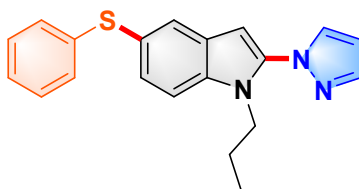

Yellow liquid, (70.0 mg, 51% yield), <sup>1</sup>H-NMR (600 MHz, Chloroform-*d*) δ 7.87 (d, *J* = 1.0 Hz, 1H), 7.85 (d, *J* = 1.3 Hz, 1H), 7.76 (d, *J* = 2.3 Hz, 1H), 7.44 (d, *J* = 6.9 Hz, 1H), 7.41 (d, *J* = 8.6 Hz, 1H), 7.28–7.22 (m, 4H), 7.16 (t, *J* = 7.1 Hz, 1H), 6.53 (s, 1H), 6.51 (t, *J* = 2.1 Hz,

1H), 4.16 (t,  $J = 12$  Hz, 2H), 1.76–1.73 (m, 2H), 0.84 (t,  $J = 7.4$  Hz, 3H).  $^{13}\text{C-NMR}$  (151 MHz, Chloroform- $d$ )  $\delta$  141.97, 139.43, 136.23, 134.95, 132.49, 128.90, 128.54, 127.95, 127.38, 127.06, 125.52, 123.82, 111.17, 106.99, 96.21, 45.36, 23.15, 11.37. **HRMS (ESI)**: Calcd. for  $\text{C}_{20}\text{H}_{19}\text{N}_3\text{S}$   $[\text{M}+\text{H}]^+$ : 334.1372; found: 334.1367.

**(7) 1-benzyl-5-(phenylthio)-2-(1H-pyrazol-1-yl)-1H-indole (7)**

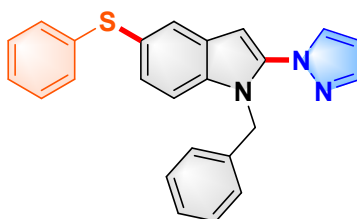

White solid, (102.1 mg, 67% yield), m.p.: 123–124 °C;  $^1\text{H-NMR}$  (600 MHz, Chloroform- $d$ )  $\delta$  7.89 (d,  $J = 1.7$  Hz, 1H), 7.85 (d,  $J = 1.8$  Hz, 1H), 7.65 (d,  $J = 2.4$  Hz, 1H), 7.40 (d,  $J = 8.6$  Hz, 1H), 7.34 (d,  $J = 8.6$  Hz, 1H), 7.28–7.25 (m, 7H), 7.19–7.16 (m, 1H), 7.04 (d,  $J = 6.1$  Hz, 2H), 6.61 (s, 1H), 6.46 (t,  $J = 2.1$  Hz, 1H), 5.44 (s, 2H).  $^{13}\text{C-NMR}$  (151 MHz, Chloroform- $d$ )  $\delta$  142.16, 139.11, 137.05, 136.40, 135.25, 132.50, 128.95, 128.72, 128.71, 128.27, 127.58, 127.26, 127.13, 126.67, 125.70, 124.54, 111.58, 107.17, 96.72, 47.22. **HRMS (ESI)**: Calcd. for  $\text{C}_{24}\text{H}_{19}\text{N}_3\text{S}$   $[\text{M}+\text{H}]^+$ : 382.1372; found: 382.1364.

**(8) 5-(phenylthio)-2-(1H-pyrazol-1-yl)-1H-indole (9)**

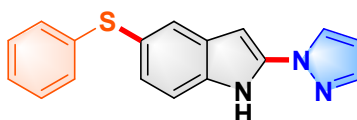

White solid, (78 mg, 67% yield), m.p.: 144–145 °C;  $^1\text{H-NMR}$  (600 MHz, Chloroform- $d$ )  $\delta$  10.46 (s, 1H), 8.02 (d,  $J = 2.4$  Hz, 1H), 7.85–7.77 (m, 2H), 7.34–7.30 (m, 2H), 7.27–7.22 (m, 4H), 7.15 (t,  $J = 7.1$  Hz, 1H), 6.57 (t,  $J = 2.2$  Hz, 1H), 6.43 (s, 1H).  $^{13}\text{C-NMR}$  (151 MHz, Chloroform- $d$ )  $\delta$  141.12, 139.48, 136.27, 133.53, 128.89, 128.13, 127.95, 127.92, 126.59, 125.49, 124.10, 112.17, 108.36, 87.17. **HRMS (ESI)**: Calcd. for  $\text{C}_{17}\text{H}_{13}\text{N}_3\text{S}$   $[\text{M}+\text{H}]^+$ : 292.0903; found: 292.0898.

**(9) 1,3-dimethyl-5-(phenylthio)-2-(1H-pyrazol-1-yl)-1H-indole (10)**

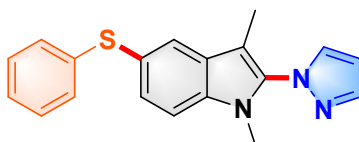

White solid, (114.8 mg, 90% yield), m.p.: 138-139 °C; <sup>1</sup>H-NMR (600 MHz, Chloroform-*d*) δ 7.88 (d, *J* = 1.9 Hz, 1H), 7.87 (d, *J* = 1.5 Hz, 1H), 7.69 (d, *J* = 2.3 Hz, 1H), 7.47 (d, *J* = 6.9 Hz, 1H), 7.35 (d, *J* = 8.5 Hz, 1H), 7.26–7.23 (m, 2H), 7.18 (d, *J* = 7.1 Hz, 2H), 7.14 (t, *J* = 7.3 Hz, 1H), 6.56 (t, *J* = 2.1 Hz, 1H), 3.55 (s, 3H), 2.22 (s, 3H). <sup>13</sup>C-NMR (151 MHz, Chloroform-*d*) δ 141.95, 139.87, 134.77, 132.93, 129.41, 128.85, 127.50, 127.43, 126.47, 125.30, 122.69, 110.63, 106.81, 105.86, 29.59, 8.02. **HRMS (ESI):** Calcd. for C<sub>19</sub>H<sub>17</sub>N<sub>3</sub>S [M+H]<sup>+</sup>: 320.1216; found: 320.1209.

**(10) 1,4-dimethyl-5-(phenylthio)-2-(1H-pyrazol-1-yl)-1H-indole (11)**

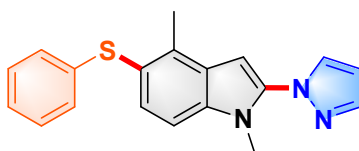

White solid, (91.9 mg, 72% yield), m.p.: 127-128 °C; <sup>1</sup>H-NMR (600 MHz, Chloroform-*d*) δ 7.87 (d, *J* = 1.9 Hz, 1H), 7.80 (d, *J* = 2.4 Hz, 1H), 7.53 (d, *J* = 8.5 Hz, 1H), 7.26 (d, *J* = 8.5 Hz, 1H), 7.22 (t, *J* = 7.7 Hz, 2H), 7.12–7.09 (m, 1H), 7.06 (d, *J* = 7.8 Hz, 2H), 6.62 (s, 1H), 6.53 (t, *J* = 2.2 Hz, 1H), 3.74 (s, 3H), 2.66 (s, 3H). <sup>13</sup>C-NMR (151 MHz, Chloroform-*d*) δ 142.06, 139.55, 135.92, 135.77, 135.73, 132.36, 130.96, 128.84, 127.19, 126.48, 124.83, 121.64, 108.47, 107.04, 95.45, 30.24, 16.97. **HRMS (ESI):** Calcd. for C<sub>19</sub>H<sub>17</sub>N<sub>3</sub>S [M+H]<sup>+</sup>: 320.1216; found: 320.1205.

**(11) 1,6-dimethyl-5-(phenylthio)-2-(1H-pyrazol-1-yl)-1H-indole (12)**

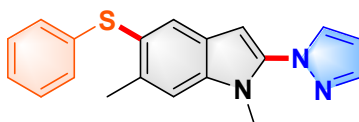

White solid, (105.9 mg, 83% yield), m.p.: 142-143 °C; <sup>1</sup>H-NMR (600 MHz, Chloroform-*d*) δ 7.89 (s, 1H), 7.86 (d, *J* = 1.8 Hz, 1H), 7.77 (d, *J* = 2.4 Hz, 1H), 7.33 (s, 1H), 7.23 (t, *J* = 7.8 Hz, 2H), 7.12 (t, *J* = 7.4 Hz, 1H), 7.08 (d, *J* = 7.8 Hz, 2H), 6.52 (t, *J* = 2.2 Hz, 1H), 6.50 (s, 1H), 3.71 (s, 3H), 2.54 (s, 3H). <sup>13</sup>C-NMR (151 MHz, Chloroform-*d*) δ 141.98, 139.18, 136.60,

136.33, 135.91, 132.41, 129.28, 128.87, 126.70, 125.15, 124.98, 123.20, 111.41, 106.97, 95.74, 30.15, 21.60. **HRMS (ESI):** Calcd. for C<sub>19</sub>H<sub>17</sub>N<sub>3</sub>S [M+H]<sup>+</sup>: 320.1216; found: 320.1207.

**(12) 8-(phenylthio)-2-(1*H*-pyrazol-1-yl)-5,6-dihydro-4*H*-pyrrolo[3,2-*ij*]quinoline (13)**

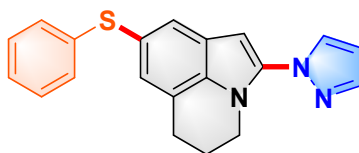

White solid, (115.2 mg, 87% yield), m.p.: 115-116 °C; **<sup>1</sup>H-NMR** (600 MHz, Chloroform-*d*) δ 7.84 (s, 1H), 7.83 (d, *J* = 2.4 Hz, 1H), 7.71 (s, 1H), 7.27–7.22 (m, 4H), 7.18 (s, 1H), 7.15 (t, *J* = 6.3 Hz, 1H), 6.51 (s, 1H), 6.45 (s, 1H), 4.30 (t, *J* = 5.1 Hz, 2H), 3.01 (t, *J* = 6.1 Hz, 2H), 2.27 (p, *J* = 5.8 Hz, 2H). **<sup>13</sup>C-NMR** (151 MHz, Chloroform-*d*) δ 141.82, 139.96, 135.65, 132.84, 131.35, 128.84, 127.69, 125.54, 125.31, 124.91, 123.59, 123.40, 107.13, 93.26, 43.22, 24.67, 22.68. **HRMS (ESI):** Calcd. for C<sub>20</sub>H<sub>17</sub>N<sub>3</sub>S [M+H]<sup>+</sup>: 332.1216; found: 332.1209.

**(13) 1,6-dimethyl-5-(phenylthio)-2-(1*H*-pyrazol-1-yl)-1*H*-indole (14)**

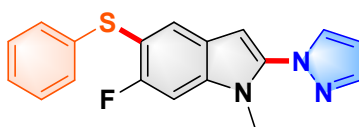

White solid, (82.7 mg, 64% yield), m.p.: 103-104 °C; **<sup>1</sup>H-NMR** (600 MHz, Chloroform-*d*) δ 7.86 (s, 1H), 7.82 (d, *J* = 7.0 Hz, 1H), 7.76 (d, *J* = 2.4 Hz, 1H), 7.26 (t, *J* = 7.6 Hz, 2H), 7.22 (d, *J* = 8.2 Hz, 2H), 7.17 (dd, *J* = 8.3, 5.7 Hz, 2H), 6.52 (t, *J* = 2.2 Hz, 1H), 6.51 (s, 1H), 3.68 (s, 3H). **<sup>13</sup>C-NMR** (151 MHz, Chloroform-*d*) δ 159.45 (d, *J* = 241.6 Hz), 142.17, 137.62, 136.65 (d, *J* = 4.5 Hz), 136.46 (d, *J* = 10.6 Hz), 132.38, 129.02, 128.97, 127.82, 125.85, 123.04, 112.74 (d, *J* = 21.1 Hz), 107.16, 97.29 (d, *J* = 28.7 Hz), 95.97, 30.44. **<sup>19</sup>F-NMR** (565 MHz, Chloroform-*d*) δ -112.80. **HRMS (ESI):** Calcd. for C<sub>18</sub>H<sub>14</sub>FN<sub>3</sub>S [M+H]<sup>+</sup>: 324.0965; found: 324.0957.

**(14) 4-chloro-1-methyl-5-(phenylthio)-2-(1*H*-pyrazol-1-yl)-1*H*-indole (15)**

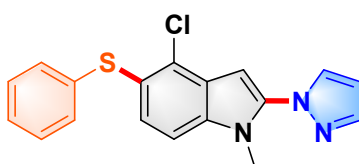

White solid, (97.6 mg, 72% yield), m.p.: 151-152 °C; <sup>1</sup>H-NMR (600 MHz, Chloroform-*d*) δ 7.86 (d, *J* = 1.8 Hz, 1H), 7.81 (d, *J* = 2.4 Hz, 1H), 7.42 (d, *J* = 8.5 Hz, 1H), 7.29–7.26 (m, 3H), 7.22 (d, *J* = 7.1 Hz, 2H), 7.19 (t, *J* = 7.2 Hz, 1H), 6.67 (s, 1H), 6.53 (t, *J* = 2.2 Hz, 1H), 3.76 (s, 3H). <sup>13</sup>C-NMR (151 MHz, Chloroform-*d*) δ 142.32, 137.24, 136.79, 136.06, 132.31, 130.13, 129.43, 129.04, 128.55, 126.28, 126.03, 123.05, 109.24, 107.34, 95.03, 30.68. **HRMS (ESI):** Calcd. for C<sub>18</sub>H<sub>14</sub>ClN<sub>3</sub>S [M+H]<sup>+</sup>: 340.0670; found: 340.0660.

**(15) 6-bromo-1-methyl-5-(phenylthio)-2-(1H-pyrazol-1-yl)-1H-indole (16)**

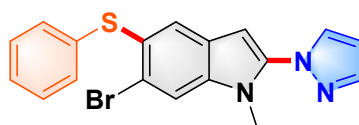

White solid, (65.9 mg, 43% yield), m.p.: 156-157 °C; <sup>1</sup>H-NMR (600 MHz, Chloroform-*d*) δ 7.85 (d, *J* = 1.8 Hz, 1H), 7.79 (s, 1H), 7.76 (d, *J* = 2.4 Hz, 1H), 7.73 (s, 1H), 7.32–7.29 (m, 2H), 7.24–7.20 (m, 3H), 6.52 (t, *J* = 2.2 Hz, 1H), 6.45 (s, 1H), 3.71 (s, 3H). <sup>13</sup>C-NMR (151 MHz, Chloroform-*d*) δ 142.25, 137.25, 136.92, 136.35, 132.29, 129.12, 128.85, 127.84, 126.30, 126.21, 125.68, 121.86, 114.71, 107.29, 95.65, 30.50. **HRMS (ESI):** Calcd. for C<sub>18</sub>H<sub>14</sub>BrN<sub>3</sub>S [M+H]<sup>+</sup>: 384.0165; found: 384.0158.

**(16) methyl 1-methyl-5-(phenylthio)-2-(1H-pyrazol-1-yl)-1H-indole-7-carboxylate (17)**

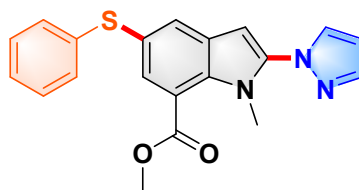

White solid, (62.4 mg, 43% yield), m.p.: 120-121 °C; <sup>1</sup>H-NMR (600 MHz, Chloroform-*d*) δ 7.96 (d, *J* = 1.8 Hz, 1H), 7.90 (d, *J* = 1.8 Hz, 1H), 7.87 (d, *J* = 1.9 Hz, 1H), 7.76 (d, *J* = 2.5 Hz, 1H), 7.26 (d, *J* = 7.5 Hz, 2H), 7.22 (d, *J* = 8.3 Hz, 2H), 7.17 (d, *J* = 7.2 Hz, 1H), 6.62 (s, 1H), 6.53 (t, *J* = 2.2 Hz, 1H), 3.98 (s, 3H), 3.63 (s, 3H). <sup>13</sup>C-NMR (151 MHz, Chloroform-*d*) δ 167.05, 142.36, 138.41, 133.21, 132.58, 131.33, 130.97, 129.38, 129.04, 128.35, 127.77, 125.94, 123.93, 117.69, 107.37, 97.25, 52.45, 33.87. **HRMS (ESI):** Calcd. for C<sub>20</sub>H<sub>17</sub>N<sub>3</sub>O<sub>2</sub>S [M+H]<sup>+</sup>: 364.1114; found: 364.1109.

**(17) 1-methyl-2-(3-methyl-1H-pyrazol-1-yl)-5-(phenylthio)-1H-indole (18)**

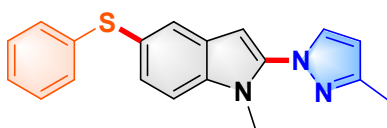

White solid, (94.4 mg, 74% yield), m.p.: 94-95 °C; <sup>1</sup>H-NMR (600 MHz, Chloroform-*d*) δ 7.85 (d, *J* = 1.5 Hz, 1H), 7.65 (d, *J* = 2.3 Hz, 1H), 7.44 (d, *J* = 8.5 Hz, 1H), 7.37 (d, *J* = 8.5 Hz, 1H), 7.27–7.23 (m, 2H), 7.21 (d, *J* = 6.5 Hz, 2H), 7.17–7.13 (m, 1H), 6.49 (s, 1H), 6.30 (d, *J* = 2.1 Hz, 1H), 3.74 (s, 3H), 2.44 (s, 3H). <sup>13</sup>C-NMR (151 MHz, Chloroform-*d*) δ 151.52, 139.56, 136.78, 135.58, 133.03, 128.88, 128.56, 127.83, 127.31, 127.08, 125.46, 123.77, 110.78, 107.07, 95.64, 30.25, 13.78. HRMS (ESI): Calcd. for C<sub>19</sub>H<sub>17</sub>N<sub>3</sub>S [M+H]<sup>+</sup>: 320.1216; found: 320.1204.

**(18) 1-methyl-2-(3-phenyl-1H-pyrazol-1-yl)-5-(phenylthio)-1H-indole (19)**

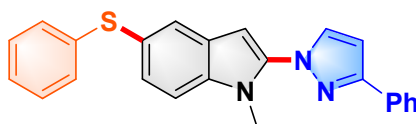

White solid, (73.2 mg, 48% yield), m.p.: 107-108 °C; <sup>1</sup>H-NMR (600 MHz, Chloroform-*d*) δ 7.96 (d, *J* = 1.4 Hz, 1H), 7.95 (s, 1H), 7.88 (d, *J* = 1.1 Hz, 1H), 7.81 (d, *J* = 2.4 Hz, 1H), 7.50–7.46 (m, 3H), 7.42–7.39 (m, 2H), 7.28–7.25 (m, 2H), 7.21 (d, *J* = 7.1 Hz, 2H), 7.16 (t, *J* = 7.2 Hz, 1H), 6.84 (d, *J* = 2.5 Hz, 1H), 6.58 (s, 1H), 3.83 (s, 3H). <sup>13</sup>C-NMR (151 MHz, Chloroform-*d*) δ 153.95, 139.52, 136.59, 135.69, 133.59, 132.66, 128.89, 128.79, 128.73, 128.44, 127.85, 127.37, 127.05, 125.94, 125.49, 123.95, 110.85, 104.52, 95.67, 30.48. HRMS (ESI): Calcd. for C<sub>24</sub>H<sub>19</sub>N<sub>3</sub>S [M+H]<sup>+</sup>: 382.1372; found: 382.1361.

**(19) 2-(4-chloro-1H-pyrazol-1-yl)-1-methyl-5-(phenylthio)-1H-indole (20)**

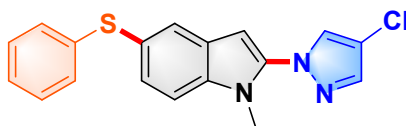

White solid, (97.6 mg, 72% yield), m.p.: 144-145 °C; <sup>1</sup>H-NMR (600 MHz, Chloroform-*d*) δ 7.86 (s, 1H), 7.79 (s, 1H), 7.77 (s, 1H), 7.47 (d, *J* = 8.5 Hz, 1H), 7.38 (d, *J* = 8.6 Hz, 1H), 7.28–7.25 (m, 2H), 7.22 (d, *J* = 7.6 Hz, 2H), 7.17 (t, *J* = 7.2 Hz, 1H), 6.52 (s, 1H), 3.73 (s, 3H). <sup>13</sup>C-

**NMR** (151 MHz, Chloroform-*d*)  $\delta$  140.67, 139.25, 135.64, 135.56, 130.01, 128.94, 128.07, 127.35, 126.75, 125.64, 124.46, 112.09, 110.94, 96.24, 30.29. **HRMS (ESI)**: Calcd. for  $C_{18}H_{14}ClN_3S$   $[M+H]^+$ : 340.0670; found: 340.0677.

**(20) 2-(4-bromo-1H-pyrazol-1-yl)-1-methyl-5-(phenylthio)-1H-indole (21)**

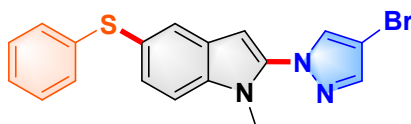

White solid, (87.3 mg, 57% yield), m.p.: 157-158 °C;  **$^1H$ -NMR** (600 MHz, Chloroform-*d*)  $\delta$  7.86 (s, 1H), 7.82 (s, 1H), 7.80 (s, 1H), 7.47 (d,  $J = 8.4$  Hz, 1H), 7.38 (d,  $J = 8.5$  Hz, 1H), 7.26 (t,  $J = 7.6$  Hz, 2H), 7.23 (d,  $J = 8.4$  Hz, 2H), 7.17 (t,  $J = 7.2$  Hz, 1H), 6.53 (s, 1H), 3.73 (s, 3H).  **$^{13}C$ -NMR** (151 MHz, Chloroform-*d*)  $\delta$  142.71, 139.26, 135.56, 135.54, 132.20, 128.96, 128.95, 128.08, 127.36, 126.76, 125.65, 124.47, 110.95, 96.30, 95.34, 30.30. **HRMS (ESI)**: Calcd. for  $C_{18}H_{14}BrN_3S$   $[M+H]^+$ : 384.0165; found: 384.0154.

**(21) 2-(4-iodo-1H-pyrazol-1-yl)-1-methyl-5-(phenylthio)-1H-indole (22)**

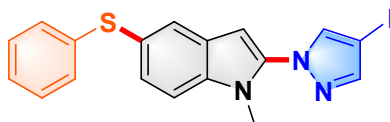

White solid, (106.6 mg, 62% yield), m.p.: 166-167 °C;  **$^1H$ -NMR** (600 MHz, Chloroform-*d*)  $\delta$  7.86 (d,  $J = 3.1$  Hz, 2H), 7.82 (s, 1H), 7.47 (d,  $J = 8.5$  Hz, 1H), 7.38 (d,  $J = 8.4$  Hz, 1H), 7.26 (t,  $J = 7.6$  Hz, 2H), 7.23–7.21 (m, 2H), 7.17 (t,  $J = 7.2$  Hz, 1H), 6.53 (s, 1H), 3.72 (s, 3H).  **$^{13}C$ -NMR** (151 MHz, Chloroform-*d*)  $\delta$  147.06, 139.25, 136.48, 135.56, 135.37, 128.94, 128.08, 127.35, 126.77, 125.64, 124.43, 110.93, 96.32, 58.63, 30.31. **HRMS (ESI)**: Calcd. for  $C_{18}H_{14}IN_3S$   $[M-H]^+$ : 429.9880; found: 429.9871.

**(22) ethyl 1-(1-methyl-5-(phenylthio)-1H-indol-2-yl)-1H-pyrazole-4-carboxylate (23)**

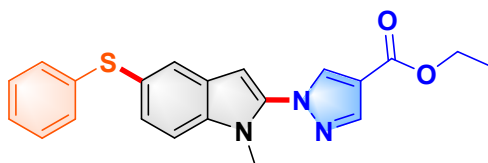



White solid, (122.1 mg, 81% yield), m.p.: 219-220 °C; <sup>1</sup>H-NMR (600 MHz, Chloroform-*d*) δ 8.27 (s, 1H), 8.24 (s, 1H), 7.85 (d, *J* = 1.8 Hz, 1H), 7.46 (d, *J* = 6.9 Hz, 1H), 7.38 (d, *J* = 8.6 Hz, 1H), 7.27–7.23 (m, 2H), 7.21 (d, *J* = 7.1 Hz, 2H), 7.16 (t, *J* = 7.1 Hz, 1H), 6.57 (s, 1H), 4.40 (q, *J* = 7.1 Hz, 2H), 3.74 (s, 3H), 1.42 (t, *J* = 7.1 Hz, 3H). <sup>13</sup>C-NMR (151 MHz, Chloroform-*d*) δ 162.51, 143.02, 139.17, 135.65, 135.48, 135.31, 129.04, 128.93, 128.12, 127.36, 126.70, 125.66, 124.62, 116.68, 110.97, 96.53, 60.67, 30.38, 14.45. **HRMS (ESI):** Calcd. for C<sub>21</sub>H<sub>19</sub>N<sub>3</sub>O<sub>2</sub>S [M+H]<sup>+</sup>: 378.1271; found: 378.1260.

**(23) 1-methyl-5-(phenylthio)-2-(1*H*-1,2,3-triazol-1-yl)-1*H*-indole (24)**

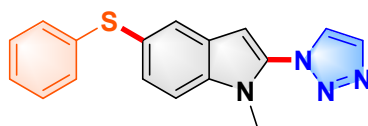

Yellow solid, (96.7 mg, 79% yield), m.p.: 81-82 °C; <sup>1</sup>H-NMR (600 MHz, Chloroform-*d*) δ 7.93 (d, *J* = 1.1 Hz, 1H), 7.91 (d, *J* = 1.2 Hz, 1H), 7.86 (d, *J* = 1.7 Hz, 1H), 7.48 (d, *J* = 6.9 Hz, 1H), 7.40 (d, *J* = 8.5 Hz, 1H), 7.27–7.24 (m, 2H), 7.22 (d, *J* = 6.8 Hz, 2H), 7.16 (t, *J* = 7.2 Hz, 1H), 6.64 (s, 1H), 3.71 (s, 3H). <sup>13</sup>C-NMR (151 MHz, Chloroform-*d*) δ 138.92, 135.75, 133.72, 132.33, 129.30, 128.98, 128.27, 127.35, 126.61, 126.56, 125.79, 125.04, 111.16, 97.36, 30.39. **HRMS (ESI):** Calcd. for C<sub>17</sub>H<sub>14</sub>N<sub>4</sub>S [M+H]<sup>+</sup>: 307.1588; found: 307.1579.

**(24) 1-methyl-5-(phenylthio)-2-(1*H*-1,2,4-triazol-1-yl)-1*H*-indole (25)**

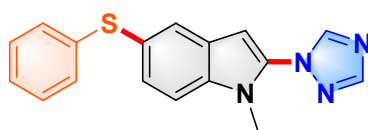

Yellow solid, (62.4 mg, 51% yield), m.p.: 98-99 °C; <sup>1</sup>H-NMR (600 MHz, Chloroform-*d*) δ 8.43 (s, 1H), 8.24 (s, 1H), 7.86 (d, *J* = 1.6 Hz, 1H), 7.47 (d, *J* = 6.9 Hz, 1H), 7.39 (d, *J* = 8.6 Hz, 1H), 7.26–7.23 (m, 2H), 7.21 (d, *J* = 7.0 Hz, 2H), 7.16 (d, *J* = 7.2 Hz, 1H), 6.61 (s, 1H), 3.70 (s, 3H). <sup>13</sup>C-NMR (151 MHz, Chloroform-*d*) δ 153.36, 145.60, 138.96, 135.80, 132.04, 129.27, 128.96, 128.24, 127.35, 126.54, 125.76, 124.95, 111.03, 97.50, 30.18. **HRMS (ESI):** Calcd. for C<sub>17</sub>H<sub>14</sub>N<sub>4</sub>S [M+H]<sup>+</sup>: 307.1588; found: 307.1570.

**(25) 1-(1-methyl-5-(phenylthio)-1*H*-indol-2-yl)-1*H*-benzo[*d*][1,2,3]triazole (26)**

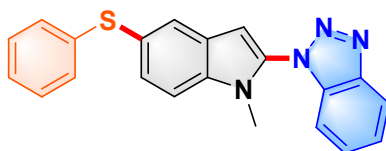

White solid, (98.3 mg, 69% yield), m.p.: 116-117 °C;  $^1\text{H-NMR}$  (600 MHz, Chloroform-*d*)  $\delta$  8.22 (d,  $J = 8.4$  Hz, 1H), 7.94 (d,  $J = 1.0$  Hz, 1H), 7.64–7.60 (m, 2H), 7.52 (d,  $J = 8.5$  Hz, 2H), 7.47 (d,  $J = 8.6$  Hz, 1H), 7.29–7.25 (m, 4H), 7.18 (t,  $J = 6.8$  Hz, 1H), 6.78 (s, 1H), 3.71 (s, 3H).  $^{13}\text{C-NMR}$  (151 MHz, Chloroform-*d*)  $\delta$  145.48, 138.99, 135.83, 134.57, 131.11, 129.22, 129.09, 128.97, 128.31, 127.41, 126.98, 125.78, 124.95, 124.92, 120.34, 111.13, 110.25, 98.09, 30.30. **HRMS (ESI):** Calcd. for  $\text{C}_{21}\text{H}_{16}\text{N}_4\text{S}$   $[\text{M}+\text{H}]^+$ : 357.1168; found: 357.1159.

**(26) 5-((2-chlorophenyl)thio)-1-methyl-2-(1H-pyrazol-1-yl)-1H-indole (27)**

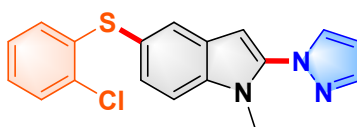

White solid, (94.9 mg, 70% yield), m.p.: 147-148 °C;  $^1\text{H-NMR}$  (600 MHz, Chloroform-*d*)  $\delta$  7.90 (d,  $J = 1.3$  Hz, 1H), 7.87 (d,  $J = 1.6$  Hz, 1H), 7.79 (d,  $J = 2.4$  Hz, 1H), 7.47 (d,  $J = 6.9$  Hz, 1H), 7.44 (d,  $J = 8.5$  Hz, 1H), 7.36 (d,  $J = 9.2$  Hz, 1H), 7.06–7.01 (m, 2H), 6.73–6.69 (m, 1H), 6.56 (s, 1H), 6.53 (t,  $J = 2.1$  Hz, 1H), 3.77 (s, 3H).  $^{13}\text{C-NMR}$  (151 MHz, Chloroform-*d*)  $\delta$  142.18, 139.57, 136.73, 136.03, 132.34, 130.69, 129.64, 129.36, 128.89, 127.44, 127.25, 127.02, 125.80, 121.43, 111.23, 107.18, 95.92, 30.36. **HRMS (ESI):** Calcd. for  $\text{C}_{18}\text{H}_{14}\text{ClN}_3\text{S}$   $[\text{M}+\text{H}]^+$ : 340.0670; found: 340.0661.

**(27) 1-methyl-2-(1H-pyrazol-1-yl)-5-(*m*-tolylthio)-1H-indole (28)**

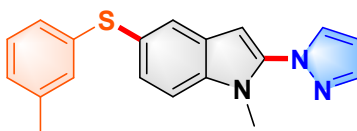

White solid, (100.8 mg, 79% yield), m.p.: 133-134 °C;  $^1\text{H-NMR}$  (600 MHz, Chloroform-*d*)  $\delta$  7.89 (t,  $J = 1.8$  Hz, 2H), 7.79 (d,  $J = 2.4$  Hz, 1H), 7.49 (d,  $J = 8.5$  Hz, 1H), 7.39 (d,  $J = 8.5$  Hz, 1H), 7.18 (t,  $J = 7.7$  Hz, 1H), 7.12 (s, 1H), 7.06 (d,  $J = 7.9$  Hz, 1H), 7.01 (d,  $J = 7.5$  Hz, 1H), 6.55 (s, 1H), 6.55–6.53 (m, 1H), 3.76 (s, 3H), 2.33 (s, 3H).  $^{13}\text{C-NMR}$  (151 MHz, Chloroform-*d*)  $\delta$  142.12, 139.15, 138.74, 136.56, 135.60, 132.37, 128.84, 128.68, 128.63, 127.20, 127.02,

126.57, 125.22, 124.26, 110.88, 107.15, 95.83, 30.33, 21.46. **HRMS (ESI):** Calcd. for  $C_{19}H_{17}N_3S$   $[M+H]^+$ : 320.1216; found: 320.1207.

**(28) 1-methyl-2-(1H-pyrazol-1-yl)-5-(p-tolylthio)-1H-indole (29)**

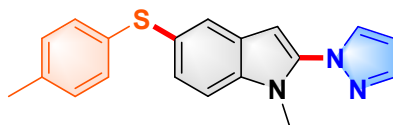

White solid, (94.4 mg, 74% yield), m.p.: 150-151 °C;  **$^1H$ -NMR** (600 MHz, Chloroform-*d*)  $\delta$  7.87 (d,  $J = 4.7$  Hz, 1H), 7.82 (d,  $J = 6.7$  Hz, 1H), 7.77 (d,  $J = 2.4$  Hz, 1H), 7.45–7.41 (m, 1H), 7.36 (d,  $J = 8.5$  Hz, 1H), 7.20 (t,  $J = 9.1$  Hz, 2H), 7.10 (t,  $J = 6.9$  Hz, 2H), 6.52 (dd,  $J = 4.3, 2.4$  Hz, 2H), 3.73 (s, 3H), 2.34 (s, 3H).  **$^{13}C$ -NMR** (151 MHz, Chloroform-*d*)  $\delta$  142.07, 136.48, 135.78, 135.38, 135.29, 132.34, 129.75, 128.97, 128.00, 126.92, 126.37, 125.27, 110.73, 107.08, 95.74, 30.27, 21.03. **HRMS (ESI):** Calcd. for  $C_{19}H_{17}N_3S$   $[M+H]^+$ : 320.1216; found: 320.1205.

**(29) 5-((4-methoxyphenyl)thio)-1-methyl-2-(1H-pyrazol-1-yl)-1H-indole (30)**

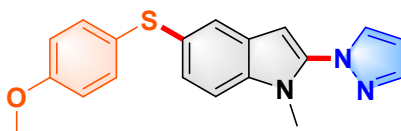

Yellow liquid (119.3 mg, 89% yield),  **$^1H$ -NMR** (600 MHz, Chloroform-*d*)  $\delta$  7.85 (s, 1H), 7.75 (s, 1H), 7.72 (s, 1H), 7.37–7.31 (m, 4H), 6.87 (d,  $J = 8.8$  Hz, 2H), 6.51 (t,  $J = 4.5$  Hz, 1H), 6.48 (s, 1H), 3.81 (s, 3H), 3.71 (s, 3H).  **$^{13}C$ -NMR** (151 MHz, Chloroform-*d*)  $\delta$  158.78, 142.04, 136.41, 135.06, 132.33, 132.27, 128.44, 127.11, 126.69, 124.67, 114.74, 110.59, 107.04, 95.62, 55.39, 30.22. **HRMS (ESI):** Calcd. for  $C_{19}H_{17}N_3OS$   $[M+H]^+$ : 336.1165; found: 336.1157.

**(30) 5-((4-fluorophenyl)thio)-1-methyl-2-(1H-pyrazol-1-yl)-1H-indole (31)**

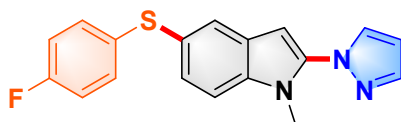

White solid, (86.6 mg, 67% yield), m.p.: 174-175 °C;  **$^1H$ -NMR** (600 MHz, Chloroform-*d*)  $\delta$  7.86 (d,  $J = 1.5$  Hz, 1H), 7.80 (d,  $J = 1.2$  Hz, 1H), 7.77 (d,  $J = 2.3$  Hz, 1H), 7.41 (s, 1H), 7.37 (d,  $J = 8.5$  Hz, 1H), 7.23 (ddt,  $J = 8.2, 5.0, 2.5$  Hz, 2H), 6.97 (t,  $J = 8.7$  Hz, 2H), 6.52 (d,  $J =$

3.4 Hz, 2H), 3.73 (s, 3H).  $^{13}\text{C-NMR}$  (151 MHz, Chloroform-*d*)  $\delta$  161.46 (d,  $J = 246.1$  Hz), 142.11, 136.60, 135.47, 134.01 (d,  $J = 3.0$  Hz), 132.32, 130.64 (d,  $J = 7.6$  Hz), 127.94, 126.96, 126.49, 124.96, 116.00 (d,  $J = 21.1$  Hz), 110.86, 107.11, 95.74, 30.28.  $^{19}\text{F-NMR}$  (565 MHz, Chloroform-*d*)  $\delta$  -116.61. **HRMS (ESI)**: Calcd. for  $\text{C}_{18}\text{H}_{14}\text{FN}_3\text{S}$   $[\text{M}+\text{H}]^+$ : 324.0965; found: 324.0957.

**(31) 5-((4-chlorophenyl)thio)-1-methyl-2-(1H-pyrazol-1-yl)-1H-indole (32)**

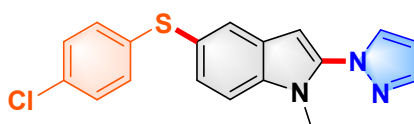

White solid, (127.5 mg, 94% yield), m.p.: 196-197 °C;  $^1\text{H-NMR}$  (600 MHz, Chloroform-*d*)  $\delta$  7.86 (s, 1H), 7.84 (s, 1H), 7.78 (d,  $J = 2.4$  Hz, 1H), 7.42 (d,  $J = 8.5$  Hz, 1H), 7.39 (d,  $J = 8.5$  Hz, 1H), 7.20 (d,  $J = 8.7$  Hz, 2H), 7.11 (d,  $J = 8.7$  Hz, 2H), 6.53 (s, 1H), 6.53–6.52 (m, 1H), 3.74 (s, 3H).  $^{13}\text{C-NMR}$  (151 MHz, Chloroform-*d*)  $\delta$  142.14, 138.21, 136.66, 135.69, 132.32, 131.29, 129.00, 128.94, 128.62, 127.47, 127.03, 123.48, 110.99, 107.13, 95.82, 30.31. **HRMS (ESI)**: Calcd. for  $\text{C}_{18}\text{H}_{14}\text{ClN}_3\text{S}$   $[\text{M}+\text{H}]^+$ : 340.0670; found: 340.0661.

**(32) 5-((4-bromophenyl)thio)-1-methyl-2-(1H-pyrazol-1-yl)-1H-indole (33)**

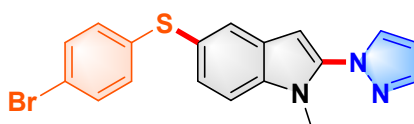

White solid, (95.0 mg, 62% yield), m.p.: 217-218 °C;  $^1\text{H-NMR}$  (600 MHz, Chloroform-*d*)  $\delta$  7.86 (d,  $J = 1.7$  Hz, 1H), 7.85 (d,  $J = 1.5$  Hz, 1H), 7.78 (d,  $J = 2.4$  Hz, 1H), 7.42 (d,  $J = 8.5$  Hz, 1H), 7.39 (d,  $J = 8.5$  Hz, 1H), 7.34 (d,  $J = 8.5$  Hz, 2H), 7.04 (d,  $J = 6.8$  Hz, 2H), 6.54 (s, 1H), 6.52 (t,  $J = 2.1$  Hz, 1H), 3.75 (s, 3H).  $^{13}\text{C-NMR}$  (151 MHz, Chloroform-*d*)  $\delta$  142.15, 139.00, 136.68, 135.72, 132.32, 131.83, 129.18, 128.70, 127.60, 127.05, 123.23, 119.06, 111.02, 107.14, 95.83, 30.32. **HRMS (ESI)**: Calcd. for  $\text{C}_{18}\text{H}_{14}\text{BrN}_3\text{S}$   $[\text{M}+\text{H}]^+$ : 384.0165; found: 384.0156.

**(33) 1-methyl-5-((4-nitrophenyl)thio)-2-(1H-pyrazol-1-yl)-1H-indole (34)**

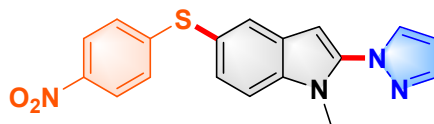

Yellow solid, (68.6 mg, 49% yield), m.p.: 244-245 °C; <sup>1</sup>H-NMR (600 MHz, Chloroform-*d*) δ 8.04 (d, *J* = 9.0 Hz, 2H), 7.91 (s, 1H), 7.87 (d, *J* = 1.9 Hz, 1H), 7.80 (d, *J* = 2.4 Hz, 1H), 7.49–7.45 (m, 2H), 7.12 (d, *J* = 9.0 Hz, 2H), 6.58 (s, 1H), 6.54 (t, *J* = 2.1 Hz, 1H), 3.79 (s, 3H). <sup>13</sup>C-NMR (151 MHz, Chloroform-*d*) δ 150.83, 144.89, 142.28, 137.03, 136.27, 132.32, 129.41, 129.01, 127.36, 125.51, 123.91, 120.04, 111.52, 107.28, 95.96, 30.44. **HRMS (ESI):** Calcd. for C<sub>18</sub>H<sub>14</sub>N<sub>4</sub>O<sub>2</sub>S [M+H]<sup>+</sup>: 351.0910; found: 351.0897.

**(34) 5-((2,4-dimethylphenyl)thio)-1-methyl-2-(1H-pyrazol-1-yl)-1H-indole (35)**

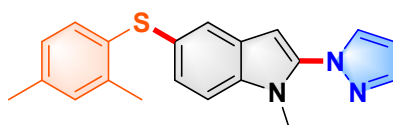

White solid, (99.9 mg, 75% yield), m.p.: 123-124 °C; <sup>1</sup>H-NMR (600 MHz, Chloroform-*d*) δ 7.85 (d, *J* = 1.6 Hz, 1H), 7.76 (d, *J* = 2.3 Hz, 1H), 7.68 (s, 1H), 7.36–7.32 (m, 2H), 7.07 (s, 1H), 7.02 (d, *J* = 7.9 Hz, 1H), 6.92 (d, *J* = 7.9 Hz, 1H), 6.51 (t, *J* = 2.1 Hz, 1H), 6.48 (s, 1H), 3.72 (s, 3H), 2.41 (s, 3H), 2.32 (s, 3H). <sup>13</sup>C-NMR (151 MHz, Chloroform-*d*) δ 142.03, 137.68, 136.36, 136.32, 135.13, 133.51, 132.31, 131.20, 130.37, 127.27, 127.04, 126.96, 125.52, 125.12, 110.67, 107.02, 95.64, 30.22, 20.94, 20.40. **HRMS (ESI):** Calcd. for C<sub>20</sub>H<sub>19</sub>N<sub>3</sub>S [M+H]<sup>+</sup>: 334.1372; found: 334.1361.

**(35) 1-methyl-2-(1H-pyrazol-1-yl)-5-(pyridin-2-ylthio)-1H-indole (36)**

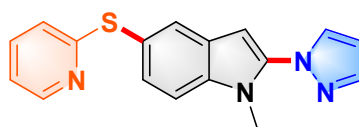

Orange solid, (99.1 mg, 81% yield), m.p.: 202-203 °C; <sup>1</sup>H-NMR (600 MHz, Chloroform-*d*) δ 8.42 (d, *J* = 4.8 Hz, 1H), 7.94 (d, *J* = 1.5 Hz, 1H), 7.85 (d, *J* = 1.9 Hz, 1H), 7.78 (d, *J* = 2.5 Hz, 1H), 7.52 (d, *J* = 6.9 Hz, 1H), 7.43 (d, *J* = 8.5 Hz, 1H), 7.40–7.37 (m, 1H), 6.95 (ddd, *J* = 7.4, 4.9, 1.0 Hz, 1H), 6.75 (d, *J* = 8.2 Hz, 1H), 6.55 (s, 1H), 6.51 (t, *J* = 2.1 Hz, 1H), 3.74 (s, 3H). <sup>13</sup>C-NMR (151 MHz, Chloroform-*d*) δ 163.60, 149.31, 142.16, 136.70, 136.61, 136.09, 132.37,

129.89, 129.09, 127.19, 120.97, 120.38, 119.29, 111.16, 107.18, 96.00, 30.34. **HRMS (ESI):** Calcd. for C<sub>17</sub>H<sub>14</sub>N<sub>4</sub>S [M+H]<sup>+</sup>: 307.1012; found: 307.1003.

**(36) 5-(ethylthio)-1-methyl-2-(1H-pyrazol-1-yl)-1H-indole (37)**

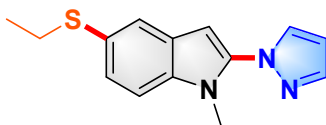

Yellow liquid, (68.9 mg, 67% yield), <sup>1</sup>H-NMR (600 MHz, Chloroform-*d*) δ 7.84 (d, *J* = 1.6 Hz, 1H), 7.76 (d, *J* = 2.2 Hz, 1H), 7.74 (d, *J* = 1.4 Hz, 1H), 7.40 (dd, *J* = 8.5, 1.7 Hz, 1H), 7.32 (d, *J* = 8.5 Hz, 1H), 6.51 (t, *J* = 2.1 Hz, 1H), 6.49 (s, 1H), 3.70 (s, 3H), 2.94 (q, *J* = 7.3 Hz, 2H), 1.30 (t, *J* = 7.3 Hz, 3H). <sup>13</sup>C-NMR (151 MHz, Chloroform-*d*) δ 141.99, 136.29, 134.93, 132.32, 126.89, 126.68, 126.40, 124.65, 110.19, 106.98, 95.48, 30.24, 30.17, 14.75. **HRMS (ESI):** Calcd. for C<sub>14</sub>H<sub>15</sub>N<sub>3</sub>S [M+H]<sup>+</sup>: 259.1059; found: 259.1050.

**(37) 5-(benzylthio)-1-methyl-2-(1H-pyrazol-1-yl)-1H-indole (38)**

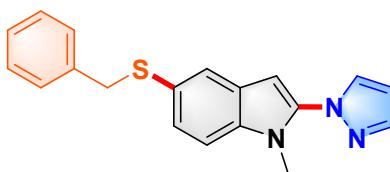

Yellow solid, (76.6 mg, 60% yield), m.p.: 105-106 °C; <sup>1</sup>H-NMR (600 MHz, Chloroform-*d*) δ 7.86 (d, *J* = 1.2 Hz, 1H), 7.76 (d, *J* = 1.8 Hz, 1H), 7.67 (d, *J* = 1.1 Hz, 1H), 7.33 (d, *J* = 8.5 Hz, 1H), 7.30–7.27 (m, 3H), 7.26–7.24 (m, 3H), 6.51 (t, *J* = 2.1 Hz, 1H), 6.47 (s, 1H), 4.12 (s, 2H), 3.70 (s, 3H). <sup>13</sup>C-NMR (151 MHz, Chloroform-*d*) δ 142.01, 138.41, 136.26, 135.17, 132.34, 128.96, 128.39, 127.51, 126.96, 126.64, 126.10, 125.60, 110.18, 107.02, 95.67, 41.69, 30.19. **HRMS (ESI):** Calcd. for C<sub>19</sub>H<sub>17</sub>N<sub>3</sub>S [M+H]<sup>+</sup>: 320.1216; found: 320.1204.

**(38) 1-methyl-5-(phenylselanyl)-2-(1H-pyrazol-1-yl)-1H-indole (39)**

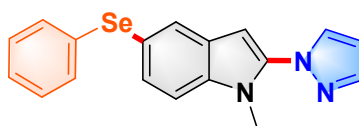

White solid, (127.1 mg, 91% yield), m.p.: 155-156 °C; <sup>1</sup>H-NMR (600 MHz, Chloroform-*d*) δ 7.98 (d, *J* = 1.7 Hz, 1H), 7.87 (d, *J* = 1.8 Hz, 1H), 7.78 (d, *J* = 2.4 Hz, 1H), 7.57 (d, *J* = 6.8 Hz,

1H), 7.39 (dd,  $J = 8.4, 1.3$  Hz, 2H), 7.35 (d,  $J = 8.6$  Hz, 1H), 7.25–7.22 (m, 2H), 7.22–7.20 (m, 1H), 6.53 (q,  $J = 2.1, 1.6$  Hz, 2H), 3.74 (s, 3H).  $^{13}\text{C-NMR}$  (151 MHz, Chloroform- $d$ )  $\delta$  142.10, 135.51, 133.98, 132.37, 130.64, 129.75, 129.16, 129.14, 128.45, 127.25, 126.26, 119.86, 110.90, 107.11, 95.70, 30.25. **HRMS (ESI):** Calcd. for  $\text{C}_{18}\text{H}_{15}\text{N}_3\text{Se}$   $[\text{M}+\text{H}]^+$ : 354.0504; found: 354.0496.

**(39) 1-methyl-3-(phenylthio)-2-(1H-pyrazol-1-yl)-1H-indole (40)**

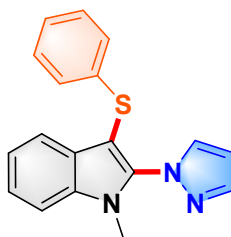

White solid (43.3 mg, 71% yield), m.p.: 112–114 °C;  $^1\text{H-NMR}$  (600 MHz, Chloroform- $d$ )  $\delta$  7.90 (d,  $J = 1.8$  Hz, 1H), 7.76–7.73 (m, 2H), 7.48 (d,  $J = 8.3$  Hz, 1H), 7.43 (t,  $J = 7.1$  Hz, 1H), 7.31–7.28 (m, 1H), 7.23–7.20 (m, 2H), 7.16–7.13 (m, 2H), 7.11 (t,  $J = 7.3$  Hz, 1H), 6.50–6.48 (m, 1H), 3.81 (s, 3H).  $^{13}\text{C-NMR}$  (151 MHz, Chloroform- $d$ )  $\delta$  142.35, 139.05, 138.55, 135.35, 133.51, 128.95, 128.15, 126.04, 125.15, 123.84, 121.60, 120.21, 110.12, 106.87, 95.56, 30.72. **HRMS (ESI):** Calcd. for  $\text{C}_{18}\text{H}_{15}\text{N}_3\text{S}$   $[\text{M}+\text{H}]^+$ : 306.1059; found: 306.1052.

**(40) 3-(phenylthio)-2-(1H-pyrazol-1-yl)-1H-indole (41)**

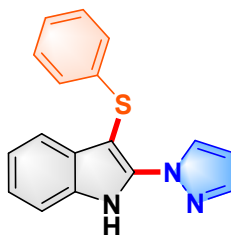

Yellow solid (32.0 mg, 55% yield), m.p.: 126–127 °C;  $^1\text{H-NMR}$  (600 MHz, Chloroform- $d$ )  $\delta$  10.65 (s, 1H), 8.79 (d,  $J = 2.6$  Hz, 1H), 7.83 (d,  $J = 1.6$  Hz, 1H), 7.70 (d,  $J = 7.8$  Hz, 1H), 7.39 (d,  $J = 8.0$  Hz, 1H), 7.28 (t,  $J = 7.0$  Hz, 1H), 7.23 (t,  $J = 7.7$  Hz, 3H), 7.17 (d,  $J = 7.3$  Hz, 2H), 7.13 (t,  $J = 7.2$  Hz, 1H), 6.55–6.49 (m, 1H).  $^{13}\text{C-NMR}$  (151 MHz, Chloroform- $d$ )  $\delta$  141.10, 137.98, 137.79, 132.88, 130.37, 130.05, 129.13, 125.57, 125.25, 123.25, 121.52, 119.41, 111.34, 108.35, 86.73. **HRMS (ESI):** Calcd. for  $\text{C}_{17}\text{H}_{13}\text{N}_3\text{S}$   $[\text{M}+\text{H}]^+$ : 292.0903; found: 292.0892.

**(41) 4-methoxy-1-methyl-3-(phenylthio)-2-(1*H*-pyrazol-1-yl)-1*H*-indole (42)**

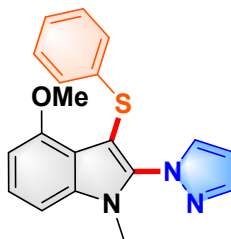

White solid (56.3 mg, 84% yield), m.p.: 94-95 °C; <sup>1</sup>H-NMR (600 MHz, Chloroform-*d*) δ 7.86 (s, 1H), 7.70 (d, *J* = 2.0 Hz, 1H), 7.36 (d, *J* = 8.9 Hz, 1H), 7.20 (t, *J* = 7.6 Hz, 2H), 7.14 (d, *J* = 2.3 Hz, 1H), 7.10 (dd, *J* = 13.6, 7.3 Hz, 3H), 7.05 (d, *J* = 8.9 Hz, 1H), 6.47–6.44 (m, 1H), 3.85 (s, 3H), 3.76 (s, 3H). <sup>13</sup>C-NMR (151 MHz, Chloroform-*d*) δ 155.62, 142.23, 139.17, 138.65, 133.39, 130.24, 128.94, 128.91, 125.82, 125.05, 114.31, 111.12, 106.79, 101.27, 94.86, 55.83, 30.81. **HRMS (ESI):** Calcd. for C<sub>19</sub>H<sub>17</sub>N<sub>3</sub>OS [M+H]<sup>+</sup>: 336.1165; found: 336.1157.

**(42) 1-(phenylthio)-2-(1*H*-pyrazol-1-yl)-5,6-dihydro-4*H*-pyrrolo[3,2,1-*ij*]quinoline (43)**

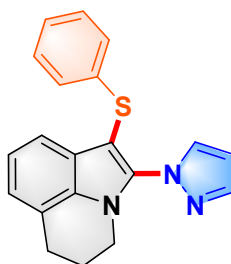

White solid (54.3 mg, 82% yield), m.p.: 128-129 °C; <sup>1</sup>H-NMR (600 MHz, Chloroform-*d*) δ 7.90 (d, *J* = 2.1 Hz, 2H), 7.58 (d, *J* = 7.8 Hz, 1H), 7.24 (dt, *J* = 22.2, 7.6 Hz, 5H), 7.15 (t, *J* = 7.8 Hz, 2H), 6.49 (t, *J* = 5.3 Hz, 1H), 4.38–4.31 (m, 2H), 3.14–3.08 (m, 2H), 2.36–2.31 (m, 2H). <sup>13</sup>C-NMR (151 MHz, Chloroform-*d*) δ 142.08, 138.97, 137.80, 132.99, 132.32, 129.03, 126.80, 125.93, 125.12, 122.65, 121.66, 120.72, 117.41, 106.88, 93.16, 43.58, 24.74, 22.78. **HRMS (ESI):** Calcd. for C<sub>20</sub>H<sub>17</sub>N<sub>3</sub>S [M+H]<sup>+</sup>: 332.1216; found: 332.1208.

**(43) 4-chloro-1-methyl-3-(phenylthio)-2-(1*H*-pyrazol-1-yl)-1*H*-indole (44)**

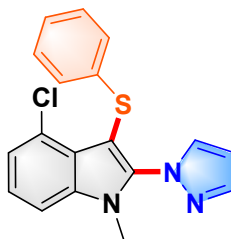



White solid (51.5 mg, 76% yield), m.p.: 156-157 °C; <sup>1</sup>H-NMR (600 MHz, Chloroform-*d*) δ 7.87 (d, *J* = 1.8 Hz, 1H), 7.69 (d, *J* = 2.5 Hz, 1H), 7.36 (d, *J* = 8.2 Hz, 1H), 7.30–7.27 (m, 1H), 7.24–7.20 (m, 3H), 7.13–7.09 (m, 3H), 6.47 (t, *J* = 2.2 Hz, 1H), 3.75 (s, 3H). <sup>13</sup>C-NMR (151 MHz, Chloroform-*d*) δ 142.54, 140.56, 140.16, 136.63, 133.78, 128.89, 127.41, 125.91, 125.01, 124.24, 124.02, 123.04, 108.93, 106.93, 95.89, 30.97. **HRMS (ESI):** Calcd. for C<sub>18</sub>H<sub>14</sub>ClN<sub>3</sub>S [M+H]<sup>+</sup>: 340.0670; found: 340.0659.

**(44) 6-bromo-1-methyl-3-(phenylthio)-2-(1H-pyrazol-1-yl)-1H-indole (45)**

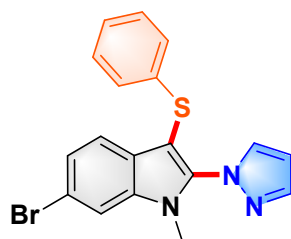

White solid (48.3 mg, 63% yield), m.p.: 161-162 °C; <sup>1</sup>H-NMR (600 MHz, Chloroform-*d*) δ 8.04 (d, *J* = 1.6 Hz, 1H), 7.86 (d, *J* = 1.8 Hz, 1H), 7.71 (d, *J* = 2.2 Hz, 1H), 7.64 (d, *J* = 6.9 Hz, 1H), 7.23–7.20 (m, 2H), 7.19 (s, 1H), 7.11 (t, *J* = 7.4 Hz, 1H), 7.07 (d, *J* = 7.3 Hz, 2H), 6.47–6.46 (m, 1H), 3.77 (s, 3H). <sup>13</sup>C-NMR (151 MHz, Chloroform-*d*) δ 142.52, 139.50, 138.04, 134.45, 133.41, 132.29, 130.56, 129.06, 128.81, 125.96, 125.35, 112.09, 107.06, 94.70, 85.32, 30.94. **HRMS (ESI):** Calcd. for C<sub>18</sub>H<sub>14</sub>BrN<sub>3</sub>S [M+H]<sup>+</sup>: 384.0165; found: 384.0155.

**(45) methyl 1-methyl-3-(phenylthio)-2-(1H-pyrazol-1-yl)-1H-indole-7-carboxylate (46)**

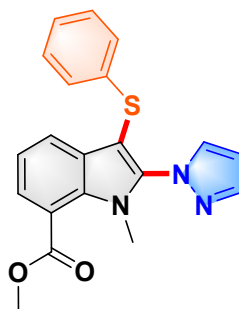

White solid (34.1 mg, 47% yield), m.p.: 194-195 °C; <sup>1</sup>H-NMR (600 MHz, Chloroform-*d*) δ 7.89–7.86 (m, 2H), 7.81 (d, *J* = 8.6 Hz, 1H), 7.70 (d, *J* = 2.3 Hz, 1H), 7.26 (t, *J* = 7.7 Hz, 1H), 7.19 (t, *J* = 7.7 Hz, 2H), 7.11–7.07 (m, 3H), 6.50–6.48 (m, 1H), 4.02 (s, 3H), 3.70 (s, 3H). <sup>13</sup>C-NMR (151 MHz, Chloroform-*d*) δ 167.65, 142.62, 140.95, 137.85, 133.59, 133.03, 129.99,

128.96, 127.02, 126.22, 125.34, 124.50, 120.69, 117.24, 107.10, 97.42, 52.42, 34.48. **HRMS (ESI):** Calcd. for C<sub>20</sub>H<sub>17</sub>N<sub>3</sub>O<sub>2</sub>S [M+H]<sup>+</sup>: 364.1114; found: 364.1107.

**(46) *N,N*-diethyl-1-methyl-3-(phenylthio)-1*H*-indol-2-amine (47)**

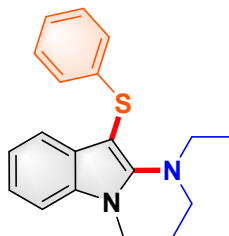

Yellow liquid (25.4 mg, 41% yield), **<sup>1</sup>H-NMR** (600 MHz, Chloroform-*d*) δ 7.54 (dt, *J* = 7.8, 0.9 Hz, 1H), 7.35 (dt, *J* = 8.2, 0.9 Hz, 1H), 7.29 (d, *J* = 7.0 Hz, 1H), 7.19–7.15 (m, 3H), 7.11–7.08 (m, 2H), 7.06 (t, *J* = 7.3 Hz, 1H), 3.73 (s, 3H), 3.31 (q, *J* = 7.2 Hz, 4H), 1.01 (t, *J* = 7.2 Hz, 6H). **<sup>13</sup>C-NMR** (151 MHz, Chloroform-*d*) δ 150.41, 139.79, 134.72, 129.52, 128.58, 125.24, 124.23, 121.73, 120.40, 118.55, 109.59, 92.88, 48.40, 28.92, 13.75. **HRMS (ESI):** Calcd. for C<sub>19</sub>H<sub>22</sub>N<sub>2</sub>S [M+H]<sup>+</sup>: 311.1576; found: 311.1568.

**(47) *N*,1-dimethyl-3-(phenylthio)-*N*-propyl-1*H*-indol-2-amine (48)**

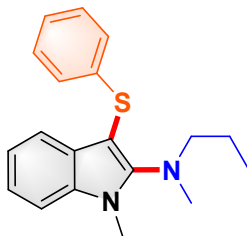

Yellow liquid (30.4 mg, 49% yield), **<sup>1</sup>H-NMR** (600 MHz, Chloroform-*d*) δ 7.55 (dd, *J* = 7.8, 0.9 Hz, 1H), 7.32 (d, *J* = 8.2 Hz, 1H), 7.28–7.24 (m, 1H), 7.18 (dddt, *J* = 11.5, 7.1, 5.6, 3.1 Hz, 3H), 7.11 (d, *J* = 7.3 Hz, 2H), 7.06 (t, *J* = 7.3 Hz, 1H), 3.72 (s, 3H), 3.24–3.20 (m, 2H), 2.94 (s, 3H), 1.56–1.51 (m, 2H), 0.89–0.86 (m, 3H). **<sup>13</sup>C-NMR** (151 MHz, Chloroform-*d*) δ 152.51, 140.31, 134.66, 129.74, 128.62, 125.21, 124.25, 121.65, 120.45, 118.37, 109.34, 90.80, 57.87, 41.62, 29.09, 21.35, 11.46. **HRMS (ESI):** Calcd. for C<sub>19</sub>H<sub>22</sub>N<sub>2</sub>S [M+H]<sup>+</sup>: 311.1576; found: 311.1568.

**(48) *N*,1-dimethyl-*N*-pentyl-3-(phenylthio)-1*H*-indol-2-amine (49)**

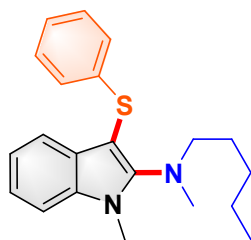

Yellow liquid (35.8 mg, 53% yield),  $^1\text{H-NMR}$  (600 MHz, Chloroform-*d*)  $\delta$  7.57 (d,  $J = 7.9$  Hz, 1H), 7.34 (d,  $J = 8.1$  Hz, 1H), 7.30–7.27 (m, 1H), 7.21–7.16 (m, 3H), 7.13 (s, 2H), 7.08 (t,  $J = 7.3$  Hz, 1H), 3.73 (s, 3H), 3.28–3.24 (m, 2H), 2.95 (s, 3H), 1.54–1.49 (m, 2H), 1.30–1.23 (m, 4H), 0.89 (t,  $J = 7.0$  Hz, 3H).  $^{13}\text{C-NMR}$  (151 MHz, Chloroform-*d*)  $\delta$  152.50, 140.35, 134.70, 129.81, 128.63, 125.24, 124.27, 121.66, 120.47, 118.39, 109.37, 90.82, 56.05, 41.76, 29.23, 29.11, 27.92, 22.54, 14.13. **HRMS (ESI):** Calcd. for  $\text{C}_{21}\text{H}_{26}\text{N}_2\text{S}$   $[\text{M}+\text{H}]^+$ : 339.1189; found: 339.1882.

**(49) 1-methyl-3-(phenylthio)-2-(piperidin-1-yl)-1H-indole (50)**

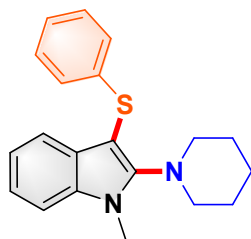

Yellow liquid (37.4 mg, 58% yield),  $^1\text{H-NMR}$  (600 MHz, Chloroform-*d*)  $\delta$  7.55 (d,  $J = 7.8$  Hz, 1H), 7.32 (d,  $J = 8.0$  Hz, 1H), 7.26 (t,  $J = 7.3$  Hz, 1H), 7.20 (dd,  $J = 8.3, 7.2$  Hz, 2H), 7.16 (t,  $J = 7.4$  Hz, 1H), 7.12 (d,  $J = 7.8$  Hz, 2H), 7.08 (t,  $J = 7.2$  Hz, 1H), 3.72 (s, 3H), 3.32–3.29 (m, 4H), 1.71 (q,  $J = 5.6$  Hz, 4H), 1.63 (q,  $J = 5.9$  Hz, 2H).  $^{13}\text{C-NMR}$  (151 MHz, Chloroform-*d*)  $\delta$  152.71, 140.85, 134.85, 129.78, 128.65, 125.08, 124.19, 121.58, 120.41, 118.35, 109.22, 89.30, 52.60, 29.03, 26.74, 24.18. **HRMS (ESI):** Calcd. for  $\text{C}_{20}\text{H}_{22}\text{N}_2\text{S}$   $[\text{M}+\text{H}]^+$ : 323.1576; found: 323.1570.

**(50) 2-(4-methoxypiperidin-1-yl)-1-methyl-3-(phenylthio)-1H-indole (51)**

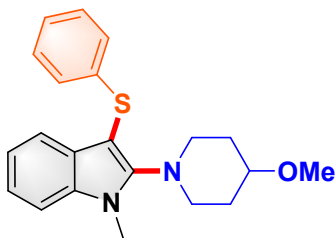

Yellow liquid (49.3 mg, 70% yield),  $^1\text{H-NMR}$  (600 MHz, Chloroform-*d*)  $\delta$  7.56 (d,  $J = 8.1$  Hz, 1H), 7.33 (d,  $J = 8.1$  Hz, 1H), 7.29–7.27 (m, 1H), 7.23–7.19 (m, 2H), 7.19–7.15 (m, 1H), 7.14–7.11 (m, 2H), 7.08 (t,  $J = 7.3$  Hz, 1H), 3.72 (s, 3H), 3.43 (s, 3H), 3.40–3.34 (m, 5H), 2.10–2.05 (m, 2H), 1.74–1.67 (m, 2H).  $^{13}\text{C-NMR}$  (151 MHz, Chloroform-*d*)  $\delta$  151.85, 140.61, 134.84, 129.66, 128.71, 125.09, 124.31, 121.82, 120.54, 118.44, 109.35, 89.89, 55.69, 32.02, 29.03. **HRMS (ESI):** Calcd. for  $\text{C}_{21}\text{H}_{24}\text{N}_2\text{OS}$   $[\text{M}+\text{H}]^+$ : 353.1682; found: 353.1674.

**(51) methyl 1-(1-methyl-3-(phenylthio)-1*H*-indol-2-yl)piperidine-4-carboxylate (52)**

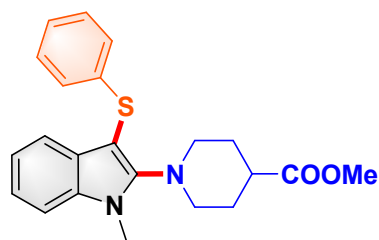

Yellow liquid (20.5 mg, 27% yield),  $^1\text{H-NMR}$  (600 MHz, Chloroform-*d*)  $\delta$  7.53 (d,  $J = 7.8$  Hz, 1H), 7.31 (d,  $J = 8.1$  Hz, 1H), 7.26 (t,  $J = 7.5$  Hz, 1H), 7.18 (t,  $J = 7.7$  Hz, 2H), 7.14 (t,  $J = 7.4$  Hz, 1H), 7.09–7.05 (m, 3H), 3.73 (s, 3H), 3.70 (s, 3H), 3.40 (t,  $J = 11.2$  Hz, 2H), 3.26 (d,  $J = 12.3$  Hz, 2H), 2.50–2.45 (m, 1H), 2.02–1.98 (m, 2H), 1.90–1.84 (m, 2H).  $^{13}\text{C-NMR}$  (151 MHz, Chloroform-*d*)  $\delta$  175.55, 151.71, 140.52, 134.75, 129.56, 128.68, 125.09, 124.32, 121.86, 120.53, 118.47, 109.35, 90.23, 51.78, 51.09, 40.86, 29.10, 28.95. **HRMS (ESI):** Calcd. for  $\text{C}_{22}\text{H}_{24}\text{N}_2\text{O}_2\text{S}$   $[\text{M}+\text{H}]^+$ : 381.1631; found: 381.1622.

**(52) 4-(1-methyl-3-(phenylthio)-1*H*-indol-2-yl)morpholine (53)**

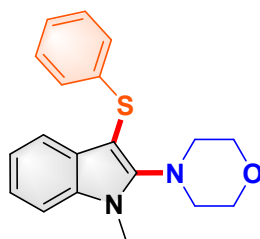

Yellow solid (35.0 mg, 54% yield), m.p.: 121–122 °C;  $^1\text{H-NMR}$  (600 MHz, Chloroform-*d*)  $\delta$  7.59 (d,  $J = 7.8$  Hz, 1H), 7.34 (d,  $J = 8.1$  Hz, 1H), 7.31–7.28 (m, 1H), 7.22–7.17 (m, 3H), 7.12–7.07 (m, 3H), 3.86–3.84 (m, 4H), 3.75 (s, 3H), 3.36 (s, 4H).  $^{13}\text{C-NMR}$  (151 MHz, Chloroform-*d*)  $\delta$  150.67, 140.41, 134.77, 129.61, 128.74, 125.14, 124.43, 122.10, 120.71,

118.65, 109.46, 90.80, 67.59, 51.52, 29.07. **HRMS (ESI):** Calcd. for C<sub>19</sub>H<sub>20</sub>N<sub>2</sub>OS [M+H]<sup>+</sup>: 325.1369; found: 325.1361.

**(53) tert-butyl 4-(1-methyl-3-(phenylthio)-1H-indol-2-yl)piperazine-1-carboxylate (54)**

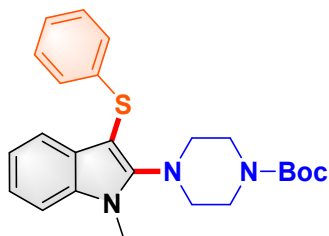

Brown solid (58.4 mg, 69% yield), m.p.: 196-197 °C; **<sup>1</sup>H-NMR** (600 MHz, Chloroform-*d*) δ 7.55 (d, *J* = 7.8 Hz, 1H), 7.33 (d, *J* = 8.1 Hz, 1H), 7.30–7.27 (m, 1H), 7.21–7.15 (m, 3H), 7.07 (dd, *J* = 8.3, 7.0 Hz, 3H), 3.73 (s, 3H), 3.57 (s, 4H), 3.30 (s, 4H), 1.52 (s, 9H). **<sup>13</sup>C-NMR** (151 MHz, Chloroform-*d*) δ 154.81, 150.86, 140.28, 134.79, 129.50, 128.77, 125.08, 124.46, 122.13, 120.71, 118.64, 109.49, 90.75, 79.97, 29.08, 28.49, 28.48. **HRMS (ESI):** Calcd. for C<sub>24</sub>H<sub>29</sub>N<sub>3</sub>O<sub>2</sub>S [M+H]<sup>+</sup>: 424.2053; found: 424.2043.

**(54) N-benzyl-N,1-dimethyl-3-(phenylthio)-1H-indol-2-amine (55)**

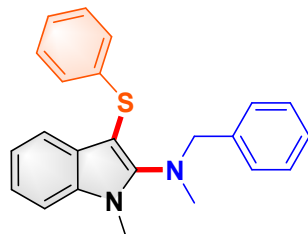

Yellow solid (44.4 mg, 62% yield), m.p.: 92-93 °C; **<sup>1</sup>H-NMR** (600 MHz, Chloroform-*d*) δ 7.66 (d, *J* = 7.9 Hz, 1H), 7.48–7.39 (m, 5H), 7.39–7.34 (m, 2H), 7.31–7.25 (m, 3H), 7.24–7.22 (m, 3H), 7.15 (t, *J* = 7.2 Hz, 1H), 4.56 (s, 2H), 3.82 (s, 3H), 2.96 (s, 3H). **<sup>13</sup>C-NMR** (151 MHz, Chloroform-*d*) δ 152.45, 140.28, 138.67, 134.77, 129.71, 128.82, 128.66, 128.51, 127.38, 125.38, 125.37, 124.49, 122.00, 120.67, 118.66, 109.56, 91.35, 60.26, 41.47, 29.33. **HRMS (ESI):** Calcd. for C<sub>23</sub>H<sub>22</sub>N<sub>2</sub>S [M+H]<sup>+</sup>: 359.1576; found: 359.1569.

**(55) 1-methyl-2-(3-methyl-1H-pyrazol-1-yl)-3-(phenylthio)-1H-indole (56)**

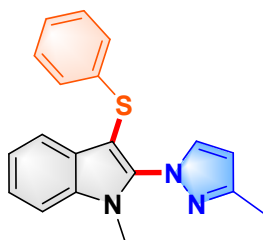

Green liquid (49.1 mg, 77% yield),  $^1\text{H-NMR}$  (600 MHz, Chloroform-*d*)  $\delta$  7.69 (d,  $J = 7.9$  Hz, 1H), 7.60 (d,  $J = 2.4$  Hz, 1H), 7.45 (d,  $J = 8.3$  Hz, 1H), 7.39 (t,  $J = 7.6$  Hz, 1H), 7.25 (t,  $J = 7.5$  Hz, 1H), 7.21–7.17 (m, 2H), 7.12–7.07 (m, 3H), 6.25 (d,  $J = 2.4$  Hz, 1H), 3.81 (s, 3H), 2.42 (s, 3H).  $^{13}\text{C-NMR}$  (151 MHz, Chloroform-*d*)  $\delta$  151.76, 139.30, 138.74, 135.33, 134.20, 128.88, 128.15, 125.90, 124.98, 123.64, 121.45, 120.09, 110.00, 106.88, 94.99, 30.73, 13.78. **HRMS (ESI)**: Calcd. for  $\text{C}_{19}\text{H}_{17}\text{N}_3\text{S}$   $[\text{M}+\text{H}]^+$ : 320.1216; found: 320.1208.

**(56) 2-(4-chloro-1H-pyrazol-1-yl)-1-methyl-3-(phenylthio)-1H-indole (57)**

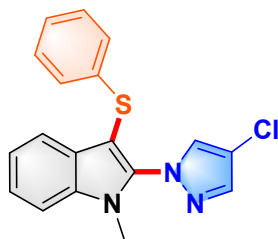

Yellow solid (50.9 mg, 75% yield), m.p.: 107–109 °C;  $^1\text{H-NMR}$  (600 MHz, Chloroform-*d*)  $\delta$  7.79 (s, 1H), 7.72 (d,  $J = 6.7$  Hz, 2H), 7.47 (d,  $J = 8.4$  Hz, 1H), 7.43 (t,  $J = 7.3$  Hz, 1H), 7.28 (t,  $J = 7.2$  Hz, 1H), 7.21 (t,  $J = 7.7$  Hz, 2H), 7.13–7.10 (m, 3H), 3.79 (s, 3H).  $^{13}\text{C-NMR}$  (151 MHz, Chloroform-*d*)  $\delta$  140.95, 138.04, 138.02, 135.30, 131.06, 129.01, 127.90, 126.19, 125.35, 124.16, 121.77, 120.36, 111.76, 110.17, 96.34, 30.69. **HRMS (ESI)**: Calcd. for  $\text{C}_{18}\text{H}_{14}\text{ClN}_3\text{S}$   $[\text{M}+\text{H}]^+$ : 340.0669; found: 340.0663.

**(57) 1-methyl-3-(phenylthio)-2-(1H-1,2,3-triazol-1-yl)-1H-indole (58)**

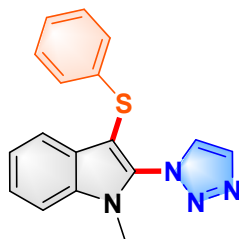

White solid (36.1 mg, 59% yield), m.p.: 117–118 °C;  $^1\text{H-NMR}$  (600 MHz, Chloroform-*d*)  $\delta$  7.90 (d,  $J = 1.1$  Hz, 1H), 7.86 (d,  $J = 1.1$  Hz, 1H), 7.75 (d,  $J = 8.0$  Hz, 1H), 7.51 (d,  $J = 8.3$  Hz,

1H), 7.46 (t,  $J = 7.5$  Hz, 1H), 7.30 (t,  $J = 7.3$  Hz, 1H), 7.19 (t,  $J = 7.7$  Hz, 2H), 7.10 (dd,  $J = 17.0, 7.6$  Hz, 3H), 3.80 (s, 3H).  $^{13}\text{C-NMR}$  (151 MHz, Chloroform- $d$ )  $\delta$  137.58, 135.56, 134.90, 133.31, 129.08, 127.96, 127.41, 126.23, 125.55, 124.61, 122.04, 120.49, 110.38, 97.36, 30.89. **HRMS (ESI):** Calcd. for  $\text{C}_{17}\text{H}_{14}\text{N}_4\text{S}$   $[\text{M}+\text{H}]^+$ : 307.1588; found: 307.1579.

**(58) 1-methyl-3-(phenylthio)-2-(1H-1,2,4-triazol-1-yl)-1H-indole (59)**

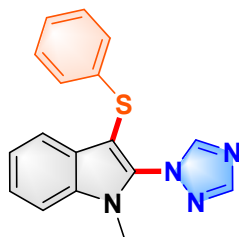

White solid (49.0 mg, 80% yield), m.p.: 124-125 °C;  $^1\text{H-NMR}$  (600 MHz, Chloroform- $d$ )  $\delta$  8.36 (s, 1H), 8.24 (s, 1H), 7.76 (d,  $J = 7.9$  Hz, 1H), 7.49 (d,  $J = 8.2$  Hz, 1H), 7.44 (t,  $J = 7.7$  Hz, 1H), 7.32–7.29 (m, 1H), 7.19 (t,  $J = 7.7$  Hz, 2H), 7.10 (q,  $J = 7.6$  Hz, 3H), 3.80 (s, 3H).  $^{13}\text{C-NMR}$  (151 MHz, Chloroform- $d$ )  $\delta$  153.29, 146.57, 137.85, 135.54, 134.93, 129.10, 127.93, 126.20, 125.56, 124.54, 122.00, 120.52, 110.25, 97.50, 30.74. **HRMS (ESI):** Calcd. for  $\text{C}_{17}\text{H}_{14}\text{N}_4\text{S}$   $[\text{M}+\text{H}]^+$ : 307.1588; found: 307.1579.

**(59) 1-(1-methyl-3-(phenylthio)-1H-indol-2-yl)-1H-benzo[ $d$ ][1,2,3]triazole (60)**

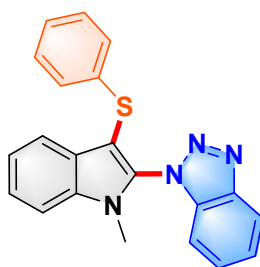

Pink solid (45.6 mg, 64% yield), m.p.: 147-148 °C;  $^1\text{H-NMR}$  (600 MHz, Chloroform- $d$ )  $\delta$  8.19 (d,  $J = 8.2$  Hz, 1H), 7.80 (d,  $J = 8.0$  Hz, 1H), 7.54 (d,  $J = 8.3$  Hz, 1H), 7.51–7.45 (m, 3H), 7.35–7.32 (m, 2H), 7.16–7.12 (m, 2H), 7.11–7.06 (m, 3H), 3.64 (s, 3H).  $^{13}\text{C-NMR}$  (151 MHz, Chloroform- $d$ )  $\delta$  145.27, 137.05, 136.00, 134.89, 133.40, 128.95, 128.84, 127.97, 126.93, 125.56, 124.74, 124.63, 121.88, 120.65, 120.28, 110.46, 110.43, 30.36. **HRMS (ESI):** Calcd. for  $\text{C}_{21}\text{H}_{16}\text{N}_4\text{S}$   $[\text{M}+\text{H}]^+$ : 357.1168; found: 357.1159.

**(60) 1-methyl-2-(1H-pyrazol-1-yl)-3-( $p$ -tolylthio)-1H-indole (61)**

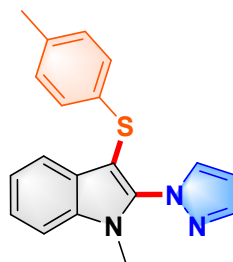

White solid (51.7 mg, 81% yield), m.p.: 111-112 °C; <sup>1</sup>H-NMR (600 MHz, Chloroform-*d*) δ 7.88 (d, *J* = 1.5 Hz, 1H), 7.76–7.72 (m, 2H), 7.46 (d, *J* = 8.2 Hz, 1H), 7.41 (t, *J* = 8.1 Hz, 1H), 7.27 (t, *J* = 6.4 Hz, 1H), 7.04–7.01 (m, 4H), 6.50–6.47 (m, 1H), 3.79 (s, 3H), 2.29 (s, 3H). <sup>13</sup>C-NMR (151 MHz, Chloroform-*d*) δ 142.29, 138.89, 135.30, 134.99, 134.86, 133.55, 129.71, 128.18, 126.39, 123.75, 121.50, 120.23, 110.04, 106.79, 96.20, 30.67, 20.91. HRMS (ESI): Calcd. for C<sub>19</sub>H<sub>17</sub>N<sub>3</sub>S [M+H]<sup>+</sup>: 320.1216; found: 320.1210.

**(61) 3-((4-methoxyphenyl)thio)-1-methyl-2-(1H-pyrazol-1-yl)-1H-indole (62)**

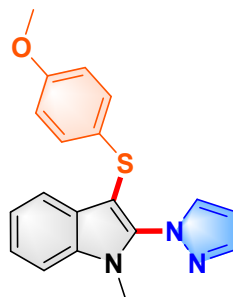

White solid (52.9 mg, 79% yield), m.p.: 85-86 °C; <sup>1</sup>H-NMR (600 MHz, Chloroform-*d*) δ 7.90 (s, 1H), 7.79–7.74 (m, 2H), 7.44 (d, *J* = 8.2 Hz, 1H), 7.40 (t, *J* = 7.6 Hz, 1H), 7.28 (t, *J* = 7.4 Hz, 1H), 7.11 (d, *J* = 8.7 Hz, 2H), 6.76 (d, *J* = 8.7 Hz, 2H), 6.51 (t, *J* = 2.0 Hz, 1H), 3.76 (s, 3H), 3.75 (s, 3H). <sup>13</sup>C-NMR (151 MHz, Chloroform-*d*) δ 158.03, 142.28, 138.59, 135.21, 133.66, 128.90, 128.80, 128.10, 123.74, 121.46, 120.19, 114.66, 110.04, 106.80, 97.61, 55.33, 30.58. HRMS (ESI): Calcd. for C<sub>19</sub>H<sub>17</sub>N<sub>3</sub>OS [M+H]<sup>+</sup>: 336.1165; found: 336.1154.

**(62) 3-((4-bromophenyl)thio)-1-methyl-2-(1H-pyrazol-1-yl)-1H-indole (63)**



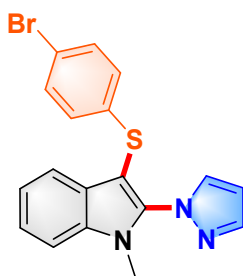

White solid (31.4 mg, 41% yield), m.p.: 85-86 °C;  $^1\text{H-NMR}$  (600 MHz, Chloroform-*d*)  $\delta$  7.87 (d,  $J = 1.7$  Hz, 1H), 7.71 (d,  $J = 2.4$  Hz, 1H), 7.68 (d,  $J = 7.9$  Hz, 1H), 7.47 (d,  $J = 8.3$  Hz, 1H), 7.42 (t,  $J = 7.6$  Hz, 1H), 7.29 (dd,  $J = 8.6, 2.1$  Hz, 3H), 6.96 (d,  $J = 8.6$  Hz, 2H), 6.49 (t,  $J = 2.1$  Hz, 1H), 3.79 (s, 3H).  $^{13}\text{C-NMR}$  (151 MHz, Chloroform-*d*)  $\delta$  142.44, 139.08, 137.79, 135.32, 133.41, 131.88, 127.81, 127.60, 123.99, 121.75, 120.01, 118.75, 110.20, 106.98, 95.07, 30.71. **HRMS (ESI):** Calcd. for  $\text{C}_{18}\text{H}_{14}\text{BrN}_3\text{S}$   $[\text{M}+\text{H}]^+$ : 384.0165; found: 384.0156.

**(63) 1-methyl-3-((4-nitrophenyl)thio)-2-(1H-pyrazol-1-yl)-1H-indole (64)**

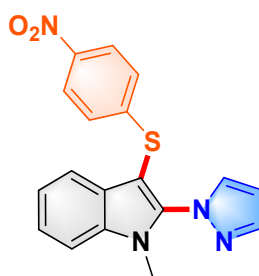

Yellow solid (53.2 mg, 76% yield), m.p.: 165-166 °C;  $^1\text{H-NMR}$  (600 MHz, Chloroform-*d*)  $\delta$  8.02 (d,  $J = 9.0$  Hz, 2H), 7.86 (d,  $J = 1.6$  Hz, 1H), 7.68 (d,  $J = 2.5$  Hz, 1H), 7.61 (d,  $J = 7.9$  Hz, 1H), 7.51 (d,  $J = 8.3$  Hz, 1H), 7.44 (t,  $J = 7.7$  Hz, 1H), 7.30 (d,  $J = 7.2$  Hz, 1H), 7.16 (d,  $J = 9.0$  Hz, 2H), 6.50–6.48 (m, 1H), 3.81 (s, 3H).  $^{13}\text{C-NMR}$  (151 MHz, Chloroform-*d*)  $\delta$  148.59, 145.22, 142.63, 139.37, 135.41, 133.19, 127.40, 125.26, 124.32, 124.07, 122.10, 119.73, 110.45, 107.23, 93.12, 30.78. **HRMS (ESI):** Calcd. for  $\text{C}_{18}\text{H}_{14}\text{N}_4\text{O}_2\text{S}$   $[\text{M}+\text{H}]^+$ : 351.0910; found: 351.0901.

**(64) 3-((3-bromophenyl)thio)-1-methyl-2-(1H-pyrazol-1-yl)-1H-indole (65)**

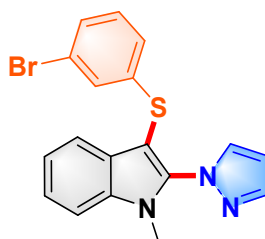

White solid (45.2 mg, 59% yield), m.p.: 95-96 °C; <sup>1</sup>H-NMR (600 MHz, Chloroform-*d*) δ 7.88 (d, *J* = 1.7 Hz, 1H), 7.71 (d, *J* = 2.4 Hz, 1H), 7.68 (d, *J* = 7.9 Hz, 1H), 7.48 (d, *J* = 8.3 Hz, 1H), 7.43–7.40 (m, 1H), 7.29 (s, 1H), 7.26 (t, *J* = 1.8 Hz, 1H), 7.21 (d, *J* = 8.4 Hz, 1H), 7.03 (t, *J* = 7.9 Hz, 1H), 6.98 (d, *J* = 8.3 Hz, 1H), 6.50–6.48 (m, 1H), 3.80 (s, 3H). <sup>13</sup>C-NMR (151 MHz, Chloroform-*d*) δ 142.44, 141.06, 139.17, 135.33, 133.36, 130.24, 128.39, 128.22, 127.86, 124.45, 123.98, 122.97, 121.79, 119.99, 110.22, 107.00, 94.52, 30.75. HRMS (ESI): Calcd. for C<sub>18</sub>H<sub>14</sub>BrN<sub>3</sub>S [M+H]<sup>+</sup>: 384.0165; found: 384.0154.

**(65) 1-methyl-3-((2-nitrophenyl)thio)-2-(1H-pyrazol-1-yl)-1H-indole (66)**

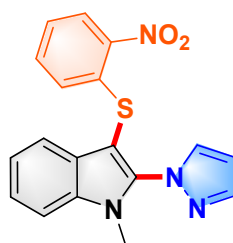

Yellow solid (51.1 mg, 73% yield), m.p.: 165-166 °C; <sup>1</sup>H-NMR (600 MHz, Chloroform-*d*) δ 8.25 (d, *J* = 6.9 Hz, 1H), 7.83 (d, *J* = 1.4 Hz, 1H), 7.73 (d, *J* = 2.1 Hz, 1H), 7.58 (d, *J* = 7.9 Hz, 1H), 7.51 (d, *J* = 8.3 Hz, 1H), 7.43 (t, *J* = 7.1 Hz, 1H), 7.31–7.28 (m, 1H), 7.26 (t, *J* = 7.1 Hz, 1H), 7.19 (t, *J* = 7.1 Hz, 1H), 7.01 (d, *J* = 7.0 Hz, 1H), 6.48–6.45 (m, 1H), 3.81 (s, 3H). <sup>13</sup>C-NMR (151 MHz, Chloroform-*d*) δ 144.97, 142.54, 139.73, 139.07, 135.56, 133.73, 133.34, 127.72, 127.51, 126.03, 124.88, 124.23, 121.99, 119.92, 110.38, 107.26, 94.36, 30.82. HRMS (ESI): Calcd. for C<sub>18</sub>H<sub>14</sub>N<sub>4</sub>O<sub>2</sub>S [M+H]<sup>+</sup>: 351.0910; found: 351.0917.

**(66) 3-((2,4-dimethylphenyl)thio)-1-methyl-2-(1H-pyrazol-1-yl)-1H-indole (67)**

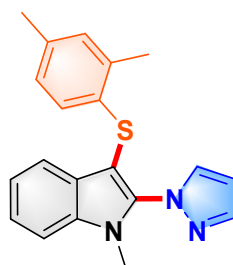

White solid (46.6 mg, 70% yield), m.p.: 117-118 °C; <sup>1</sup>H-NMR (600 MHz, Chloroform-*d*) δ 7.87 (s, 1H), 7.71 (d, *J* = 2.2 Hz, 1H), 7.69 (d, *J* = 7.9 Hz, 1H), 7.47 (d, *J* = 8.2 Hz, 1H), 7.41 (t, *J* = 7.6 Hz, 1H), 7.26 (t, *J* = 7.5 Hz, 1H), 6.99 (s, 1H), 6.79 (d, *J* = 8.0 Hz, 1H), 6.71 (d, *J* =

8.0 Hz, 1H), 6.46 (t,  $J = 1.9$  Hz, 1H), 3.81 (s, 3H), 2.41 (s, 3H), 2.26 (s, 3H).  $^{13}\text{C-NMR}$  (151 MHz, Chloroform- $d$ )  $\delta$  142.24, 138.97, 135.40, 134.78, 134.60, 133.97, 133.47, 131.00, 128.27, 127.27, 125.83, 123.72, 121.45, 120.27, 110.03, 106.76, 95.52, 30.71, 20.76, 19.88. **HRMS (ESI):** Calcd. for  $\text{C}_{20}\text{H}_{19}\text{N}_3\text{S} [\text{M}+\text{H}]^+$ : 334.1372; found: 334.1368.

**(67) 1-methyl-2-(1H-pyrazol-1-yl)-3-(pyridin-2-ylthio)-1H-indole (68)**

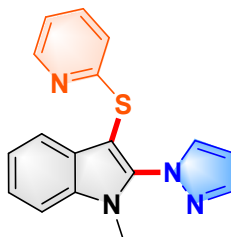

Yellow solid (37.3 mg, 61% yield), m.p.: 139-140 °C;  $^1\text{H-NMR}$  (600 MHz, Chloroform- $d$ )  $\delta$  8.39 (d,  $J = 4.9$  Hz, 1H), 7.84 (d,  $J = 1.7$  Hz, 1H), 7.83 (d,  $J = 2.5$  Hz, 1H), 7.69 (d,  $J = 7.7$  Hz, 1H), 7.49–7.46 (m, 1H), 7.42–7.37 (m, 2H), 7.27 (t,  $J = 7.2$  Hz, 1H), 6.97 (dd,  $J = 7.4, 4.9$  Hz, 1H), 6.85 (d,  $J = 8.1$  Hz, 1H), 6.46 (t,  $J = 2.1$  Hz, 1H), 3.80 (s, 3H).  $^{13}\text{C-NMR}$  (151 MHz, Chloroform- $d$ )  $\delta$  161.44, 149.42, 142.40, 139.29, 136.87, 135.42, 133.55, 127.84, 123.92, 121.70, 120.05, 120.02, 119.66, 110.19, 106.97, 94.00, 30.77. **HRMS (ESI):** Calcd. for  $\text{C}_{17}\text{H}_{14}\text{N}_4\text{S} [\text{M}+\text{H}]^+$ : 307.1012; found: 307.1003.

**(68) 1-methyl-3-((2-methylfuran-3-yl)thio)-2-(1H-pyrazol-1-yl)-1H-indole (69)**

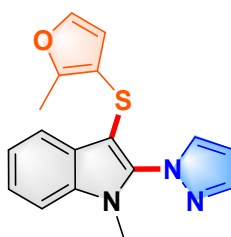

Yellow solid (53.8 mg, 87% yield), m.p.: 78-79 °C;  $^1\text{H-NMR}$  (600 MHz, Chloroform- $d$ )  $\delta$  7.92 (d,  $J = 1.7$  Hz, 1H), 7.89–7.86 (m, 2H), 7.38 (dd,  $J = 5.6, 1.1$  Hz, 2H), 7.30 (t,  $J = 6.7$  Hz, 1H), 7.11 (d,  $J = 1.8$  Hz, 1H), 6.58 (t,  $J = 2.1$  Hz, 1H), 6.08 (s, 1H), 3.67 (s, 3H), 2.26 (s, 3H).  $^{13}\text{C-NMR}$  (151 MHz, Chloroform- $d$ )  $\delta$  152.74, 142.14, 140.30, 137.64, 134.81, 133.94, 127.94, 123.60, 121.23, 120.00, 114.32, 112.00, 109.95, 106.75, 99.71, 30.28, 11.72. **HRMS (ESI):** Calcd. for  $\text{C}_{17}\text{H}_{15}\text{N}_3\text{OS} [\text{M}+\text{H}]^+$ : 310.1009; found: 310.1006.

**(69) 3-(ethylthio)-1-methyl-2-(1H-pyrazol-1-yl)-1H-indole (70)**

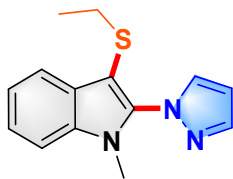

Yellow liquid (27.8 mg, 54% yield),  $^1\text{H-NMR}$  (600 MHz, Chloroform-*d*)  $\delta$  7.89 (t,  $J = 2.6$  Hz, 2H), 7.86 (d,  $J = 8.4$  Hz, 1H), 7.41 (d,  $J = 7.9$  Hz, 1H), 7.38 (t,  $J = 7.5$  Hz, 1H), 7.30 (t,  $J = 7.3$  Hz, 1H), 6.56 (t,  $J = 2.1$  Hz, 1H), 3.69 (s, 3H), 2.58 (q,  $J = 7.3$  Hz, 2H), 1.06 (t,  $J = 7.3$  Hz, 3H).  $^{13}\text{C-NMR}$  (151 MHz, Chloroform-*d*)  $\delta$  142.04, 138.28, 134.99, 133.81, 128.53, 123.51, 121.01, 120.13, 109.90, 106.57, 99.27, 30.33, 30.27, 15.12. **HRMS (ESI):** Calcd. for  $\text{C}_{14}\text{H}_{15}\text{N}_3\text{S}$   $[\text{M}+\text{H}]^+$ : 258.1059; found: 258.1052.

**(70) 1-methyl-3-(pentylthio)-2-(1H-pyrazol-1-yl)-1H-indole (71)**

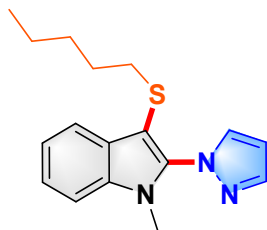

Yellow liquid (34.1 mg, 57% yield),  $^1\text{H-NMR}$  (600 MHz, Chloroform-*d*)  $\delta$  7.91 (dt,  $J = 3.2, 1.8$  Hz, 2H), 7.87 (d,  $J = 7.9$  Hz, 1H), 7.42–7.38 (m, 2H), 7.32–7.29 (m, 1H), 6.57 (d,  $J = 2.3$  Hz, 1H), 3.69 (s, 3H), 2.57 (t,  $J = 7.2$  Hz, 2H), 1.41–1.37 (m, 2H), 1.22 (d,  $J = 3.8$  Hz, 4H), 0.85 (t,  $J = 5.8$  Hz, 3H).  $^{13}\text{C-NMR}$  (151 MHz, Chloroform-*d*)  $\delta$  142.03, 138.22, 135.01, 133.83, 128.45, 123.49, 121.00, 120.10, 109.92, 106.56, 99.57, 36.49, 30.55, 30.29, 29.34, 22.23, 14.02. **HRMS (ESI):** Calcd. for  $\text{C}_{17}\text{H}_{21}\text{N}_3\text{S}$   $[\text{M}+\text{H}]^+$ : 300.1529; found: 300.1525.

**(71) 3-(benzylthio)-1-methyl-2-(1H-pyrazol-1-yl)-1H-indole (72)**

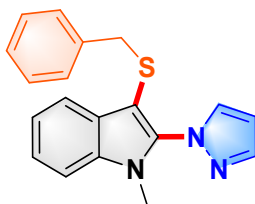

White solid (42.7 mg, 67% yield), m.p.: 106-107 °C;  $^1\text{H-NMR}$  (600 MHz, Chloroform-*d*)  $\delta$  7.84 (d,  $J = 1.9$  Hz, 1H), 7.78 (d,  $J = 7.9$  Hz, 1H), 7.43–7.39 (m, 2H), 7.30 (ddd,  $J = 8.0, 6.0, 2.1$  Hz, 1H), 7.25–7.20 (m, 3H), 7.14 (d,  $J = 2.5$  Hz, 1H), 7.05–7.01 (m, 2H), 6.43 (t,  $J = 2.2$  Hz, 1H), 3.84 (s, 2H), 3.64 (s, 3H).  $^{13}\text{C-NMR}$  (151 MHz, Chloroform-*d*)  $\delta$  142.04, 138.58, 138.51, 135.04, 133.55, 128.93, 128.36, 128.16, 126.97, 123.56, 121.13, 120.03, 110.01, 106.42, 98.85, 40.67, 30.28. **HRMS (ESI)**: Calcd. for  $\text{C}_{19}\text{H}_{17}\text{N}_3\text{S}$   $[\text{M}+\text{H}]^+$ : 320.1216; found: 320.1209.

**(72) 1-methyl-3-(phenylselanyl)-2-(1H-pyrazol-1-yl)-1H-indole (73)**

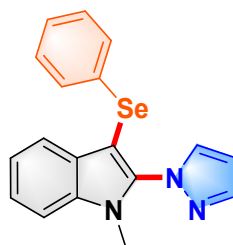

White solid (134.1 mg, 95%), m.p.: 97-98 °C;  $^1\text{H-NMR}$  (600 MHz, Chloroform-*d*)  $\delta$  7.92 (d,  $J = 1.7$  Hz, 1H), 7.81 (d,  $J = 7.9$  Hz, 1H), 7.74 (d,  $J = 2.4$  Hz, 1H), 7.48 (d,  $J = 8.1$  Hz, 1H), 7.45 (t,  $J = 7.0$  Hz, 1H), 7.33 (t,  $J = 6.8$  Hz, 1H), 7.31–7.28 (m, 2H), 7.22–7.17 (m, 3H), 6.52–6.49 (m, 1H), 3.78 (s, 3H).  $^{13}\text{C-NMR}$  (151 MHz, Chloroform-*d*)  $\delta$  142.30, 139.21, 135.74, 133.67, 133.41, 129.25, 128.98, 126.01, 123.86, 121.57, 121.20, 110.10, 106.75, 92.49, 30.64. **HRMS (ESI)**: Calcd. for  $\text{C}_{18}\text{H}_{15}\text{N}_3\text{Se}$   $[\text{M}+\text{H}]^+$ : 354.0504; found: 354.0494.

**(73) (R)-N,1-dimethyl-N-(3-phenyl-3-(*o*-tolylloxy)propyl)-3-(phenylthio)-1H-indol-2-amine (74)**

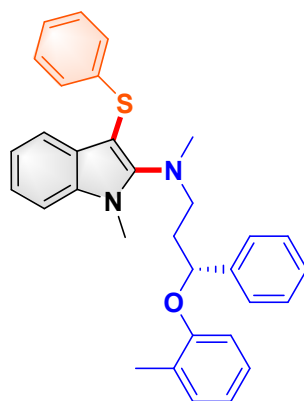

Yellow liquid (68.9 mg, 70% yield), <sup>1</sup>H-NMR (600 MHz, Chloroform-*d*) δ 7.58 (d, *J* = 7.7 Hz, 1H), 7.34 – 7.29 (m, 4H), 7.27 (td, *J* = 6.8, 1.6 Hz, 3H), 7.22 – 7.18 (m, 3H), 7.13 (dd, *J* = 14.8, 7.2 Hz, 3H), 7.09 (t, *J* = 7.3 Hz, 1H), 6.96 (td, *J* = 7.8, 1.8 Hz, 1H), 6.81 (t, *J* = 7.3 Hz, 1H), 6.54 (d, *J* = 7.8 Hz, 1H), 5.17 (dd, *J* = 8.8, 4.3 Hz, 1H), 3.65 (s, 3H), 3.55 (tdd, *J* = 12.8, 8.4, 5.8 Hz, 2H), 2.97 (s, 3H), 2.31 (s, 3H), 2.26 – 2.20 (m, 1H), 2.09 – 2.04 (m, 1H). <sup>13</sup>C-NMR (151 MHz, Chloroform-*d*) δ 156.05, 151.73, 142.03, 140.22, 134.74, 130.67, 129.76, 128.79, 128.68, 127.55, 127.02, 126.60, 125.78, 125.31, 124.44, 121.90, 120.62, 120.30, 118.53, 112.73, 109.50, 91.28, 77.52, 52.35, 42.21, 37.56, 29.07, 16.64. **HRMS (ESI):** Calcd. for C<sub>32</sub>H<sub>32</sub>N<sub>2</sub>OS [M+H]<sup>+</sup>: 493.2308; found: 493.2297.

**(74) 2-((3*S*,4*R*)-3-((benzo[*d*][1,3]dioxol-5-yl)oxy)methyl)-4-(4-fluorophenyl)piperidin-1-yl)-1-methyl-3-(phenylthio)-1*H*-indole (75)**

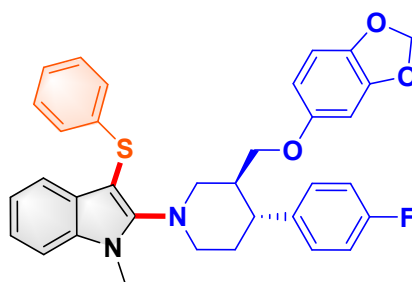

Yellow liquid (64.5 mg, 57% yield), <sup>1</sup>H-NMR (600 MHz, Chloroform-*d*) δ 7.65 (d, *J* = 7.8 Hz, 1H), 7.39 (d, *J* = 8.1 Hz, 1H), 7.34 (t, *J* = 7.3 Hz, 1H), 7.28–7.22 (m, 5H), 7.20–7.18 (m, 2H), 7.13 (d, *J* = 7.2 Hz, 1H), 7.09 (t, *J* = 8.7 Hz, 2H), 6.69 (d, *J* = 8.5 Hz, 1H), 6.35 (d, *J* = 2.5 Hz, 1H), 6.15 (d, *J* = 6.1 Hz, 1H), 5.94 (s, 2H), 3.82 (s, 3H), 3.73 (ddd, *J* = 12.3, 4.0, 1.7 Hz, 1H), 3.65 (ddd, *J* = 12.4, 8.3, 2.9 Hz, 2H), 3.54–3.49 (m, 2H), 3.41 (d, *J* = 12.1 Hz, 1H), 2.68–2.63 (m, 1H), 2.45 (dt, *J* = 11.2, 7.8, 3.7 Hz, 1H), 2.06–1.99 (m, 1H), 1.95 (dd, *J* = 13.1, 3.6 Hz, 1H). <sup>13</sup>C-NMR (151 MHz, Chloroform-*d*) δ 161.70 (d, *J* = 244.6 Hz), 154.31, 151.84, 148.23, 141.75, 140.75, 139.63 (d, *J* = 3.0 Hz), 134.92, 129.86, 128.90 (d, *J* = 7.6 Hz), 128.83, 125.26, 124.48, 121.92, 120.69, 118.52, 115.70, 115.56, 109.44, 107.91, 105.78, 101.18, 98.20, 89.88, 69.44, 55.70, 52.15, 44.22, 42.88, 35.38, 29.36. <sup>19</sup>F-NMR (565 MHz, Chloroform-*d*) δ -116.00. **HRMS (ESI):** Calcd. for C<sub>34</sub>H<sub>31</sub>FN<sub>2</sub>O<sub>3</sub>S [M+H]<sup>+</sup>: 567.2112; found: 567.2101.

**(75) *N*-(3-(10,11-dihydro-5*H*-dibenzo[*a,d*][7]annulen-5-ylidene)propyl)-*N*,1-dimethyl-3-**

**(phenylthio)-1*H*-indol-2-amine (76)**

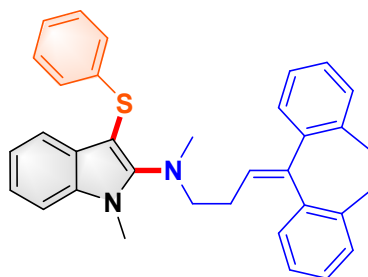

Yellow liquid (68.0 mg, 68% yield), <sup>1</sup>H-NMR (600 MHz, Chloroform-*d*) δ 7.56 (d, *J* = 7.6 Hz, 1H), 7.32 (d, *J* = 8.0 Hz, 1H), 7.29 (dd, *J* = 6.9, 1.0 Hz, 1H), 7.24 (dd, *J* = 7.3, 1.6 Hz, 1H), 7.23 – 7.18 (m, 4H), 7.18 – 7.14 (m, 3H), 7.12 – 7.09 (m, 3H), 7.09 – 7.03 (m, 3H), 5.85 (t, *J* = 7.4 Hz, 1H), 3.66 (s, 3H), 3.44 – 3.28 (m, 4H), 3.04 – 2.94 (m, 1H), 2.89 (s, 3H), 2.83 – 2.70 (m, 1H), 2.36 (q, *J* = 8.2, 7.3 Hz, 2H). <sup>13</sup>C-NMR (151 MHz, Chloroform-*d*) δ 152.04, 144.02, 141.33, 140.31, 140.00, 139.33, 137.14, 134.75, 130.09, 129.79, 129.04, 128.75, 128.61, 128.24, 128.13, 127.53, 127.17, 126.12, 125.84, 125.31, 124.41, 121.86, 120.61, 118.51, 109.47, 91.10, 55.82, 41.72, 33.85, 32.14, 29.18, 28.57. **HRMS (ESI):** Calcd. for C<sub>34</sub>H<sub>32</sub>N<sub>2</sub>S [M+H]<sup>+</sup>: 501.2359; found: 501.2348.

**(76) 1-methyl-3,5-bis(phenylthio)-2-(1*H*-pyrazol-1-yl)-1*H*-indole (77)**

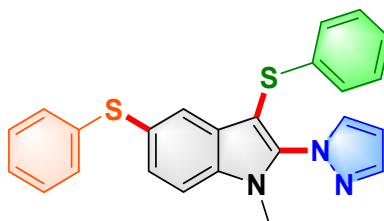

White solid, (94.0 mg, 91% yield), m.p.: 106-108 °C; <sup>1</sup>H-NMR (600 MHz, Chloroform-*d*) δ 7.93 (s, 1H), 7.89 (s, 1H), 7.76 (d, *J* = 2.4 Hz, 1H), 7.50 (d, *J* = 6.9 Hz, 1H), 7.45 (d, *J* = 8.5 Hz, 1H), 7.26–7.23 (m, 2H), 7.22 (s, 4H), 7.16 (t, *J* = 7.1 Hz, 1H), 7.11 (t, *J* = 7.6 Hz, 3H), 6.49 (t, *J* = 2.1 Hz, 1H), 3.81 (s, 3H). <sup>13</sup>C-NMR (151 MHz, Chloroform-*d*) δ 142.52, 139.72, 138.71, 138.02, 135.07, 133.47, 129.48, 129.02, 129.01, 128.95, 128.37, 126.27, 126.00, 125.87, 125.81, 125.39, 111.30, 107.05, 95.91, 30.98. **HRMS (ESI):** Calcd. for C<sub>24</sub>H<sub>19</sub>N<sub>3</sub>S<sub>2</sub> [M+H]<sup>+</sup>: 414.1093; found: 414.1089.

**(77) 1-methyl-3-(phenylselanyl)-5-(phenylthio)-2-(1*H*-pyrazol-1-yl)-1*H*-indole (78)**

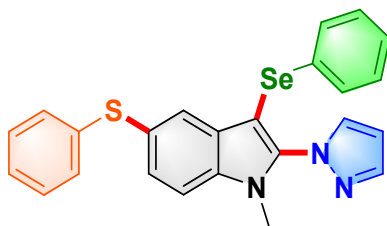

White solid, (94.5 mg, 82% yield), m.p.: 129-130 °C;  $^1\text{H-NMR}$  (600 MHz, Chloroform-*d*)  $\delta$  7.96 (d,  $J = 1.2$  Hz, 1H), 7.89 (d,  $J = 1.8$  Hz, 1H), 7.73 (d,  $J = 2.5$  Hz, 1H), 7.51 (d,  $J = 8.5$  Hz, 1H), 7.43 (d,  $J = 8.5$  Hz, 1H), 7.26–7.21 (m, 6H), 7.19–7.15 (m, 4H), 6.51–6.49 (m, 1H), 3.76 (s, 3H).  $^{13}\text{C-NMR}$  (151 MHz, Chloroform-*d*)  $\delta$  142.43, 139.80, 138.87, 135.47, 133.60, 132.85, 129.83, 129.53, 129.27, 129.25, 128.95, 128.27, 126.99, 126.21, 125.75, 125.72, 111.26, 106.88, 92.78, 30.83. **HRMS (ESI):** Calcd. for  $\text{C}_{24}\text{H}_{19}\text{N}_3\text{SSe}$   $[\text{M}+\text{H}]^+$ : 462.0597; found: 462.0561.

**(78) 1-methyl-5-(phenylthio)-2-(1H-pyrazol-1-yl)-1H-indole-3-carbonitrile (79)**

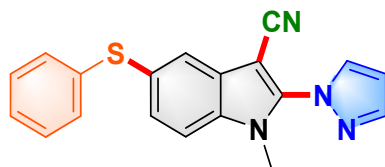

White solid, (44.6 mg, 54% yield), m.p.: 143-144 °C;  $^1\text{H-NMR}$  (600 MHz, Chloroform-*d*)  $\delta$  8.08 (d,  $J = 2.6$  Hz, 1H), 7.92 (d,  $J = 1.8$  Hz, 1H), 7.86 (d,  $J = 1.7$  Hz, 1H), 7.48 (d,  $J = 8.6$  Hz, 1H), 7.41 (d,  $J = 8.7$  Hz, 1H), 7.31–7.29 (m, 4H), 7.25–7.21 (m, 1H), 6.63–6.62 (m, 1H), 3.88 (s, 3H).  $^{13}\text{C-NMR}$  (151 MHz, Chloroform-*d*)  $\delta$  143.44, 141.26, 137.19, 134.05, 132.46, 129.71, 129.33, 129.30, 129.20, 126.68, 126.49, 123.97, 114.18, 111.68, 108.70, 79.22, 31.74. **HRMS (ESI):** Calcd. for  $\text{C}_{19}\text{H}_{14}\text{N}_4\text{S}$   $[\text{M}+\text{H}]^+$ : 331.1012; found: 331.1007.

**(79) 1-methyl-3,5-bis(phenylthio)-2-(1H-pyrazol-1-yl)-1H-indole (80)**



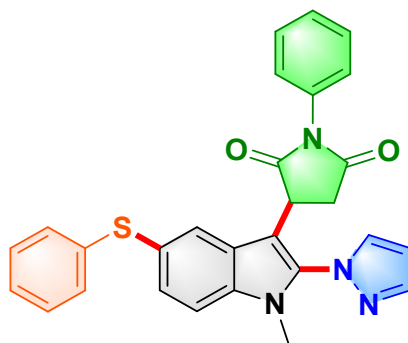

Yellow solid, (98.0 mg, 82% yield), m.p.: 155-156 °C;  $^1\text{H-NMR}$  (600 MHz, Chloroform-*d*)  $\delta$  7.88 (d,  $J = 1.9$  Hz, 1H), 7.87 (d,  $J = 2.5$  Hz, 1H), 7.71 (d,  $J = 1.6$  Hz, 1H), 7.50 (d,  $J = 7.0$  Hz, 1H), 7.45 (t,  $J = 7.6$  Hz, 2H), 7.40 (t,  $J = 8.3$  Hz, 2H), 7.26 (dd,  $J = 8.4, 6.8$  Hz, 2H), 7.24–7.22 (m, 2H), 7.20–7.16 (m, 3H), 6.57 (t,  $J = 2.0$  Hz, 1H), 4.29 (dd,  $J = 10.0, 5.7$  Hz, 1H), 3.56 (s, 3H), 3.25 (dd,  $J = 18.6, 10.0$  Hz, 1H), 3.08 (dd,  $J = 18.6, 5.7$  Hz, 1H).  $^{13}\text{C-NMR}$  (151 MHz, Chloroform-*d*)  $\delta$  176.65, 174.92, 142.66, 138.63, 134.55, 134.05, 133.65, 131.97, 129.26, 129.20, 129.06, 128.69, 128.45, 126.50, 125.97, 125.39, 125.30, 124.29, 111.46, 107.78, 105.79, 36.86, 36.25, 29.73. **HRMS (ESI):** Calcd. for  $\text{C}_{28}\text{H}_{22}\text{N}_4\text{O}_2\text{S}$   $[\text{M}+\text{H}]^+$ : 479.1536; found: 479.1531.

**(80) 1-methyl-3-(1-methyl-5-(phenylthio)-2-(1H-pyrazol-1-yl)-1H-indol-3-yl)quinoxalin-2(1H)-one (81)**

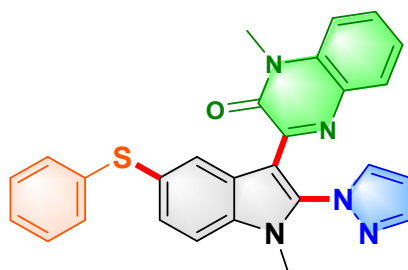

Yellow solid, (79.9 mg, 69% yield), m.p.: 245-246 °C;  $^1\text{H-NMR}$  (600 MHz, Chloroform-*d*)  $\delta$  8.27 (d,  $J = 1.7$  Hz, 1H), 7.86 (d,  $J = 1.8$  Hz, 1H), 7.83 (d,  $J = 8.0$  Hz, 1H), 7.78 (d,  $J = 2.4$  Hz, 1H), 7.52 (t,  $J = 7.8$  Hz, 1H), 7.49 (d,  $J = 8.5$  Hz, 1H), 7.43 (d,  $J = 8.6$  Hz, 1H), 7.33 (t,  $J = 7.6$  Hz, 1H), 7.27 (d,  $J = 8.4$  Hz, 1H), 7.25–7.21 (m, 4H), 7.13 (t,  $J = 6.5$  Hz, 1H), 6.45 (t,  $J = 2.1$  Hz, 1H), 3.75 (s, 3H), 3.61 (s, 3H).  $^{13}\text{C-NMR}$  (151 MHz, Chloroform-*d*)  $\delta$  153.96, 151.04, 142.09, 139.21, 136.49, 134.96, 133.55, 133.23, 133.06, 130.09, 129.96, 129.40, 128.89, 128.08, 127.85, 126.66, 125.52, 125.44, 123.53, 113.50, 111.06, 106.99, 106.50, 30.44, 29.45.

**HRMS (ESI):** Calcd. for C<sub>27</sub>H<sub>21</sub>N<sub>5</sub>OS [M+H]<sup>+</sup>: 464.1540; found: 464.1542.

**(81) 2-(1-methyl-5-(phenylthio)-2-(1*H*-pyrazol-1-yl)-1*H*-indol-3-yl)quinoline (82)**

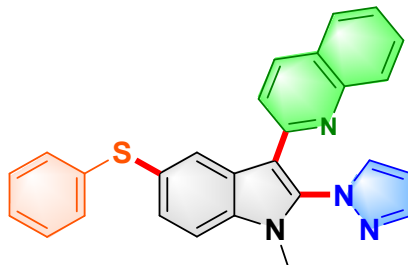

White solid, (67.0 mg, 62% yield), m.p.: 171-172 °C; <sup>1</sup>H-NMR (600 MHz, Chloroform-*d*) δ 8.86 (s, 1H), 8.12–8.09 (m, 1H), 7.99 (d, *J* = 1.9 Hz, 1H), 7.93 (d, *J* = 8.6 Hz, 1H), 7.73 (d, *J* = 8.1 Hz, 1H), 7.72–7.69 (m, 1H), 7.63 (d, *J* = 2.5 Hz, 1H), 7.54 (d, *J* = 6.9 Hz, 1H), 7.49 (t, *J* = 7.2 Hz, 1H), 7.44 (d, *J* = 8.6 Hz, 1H), 7.31–7.26 (m, 4H), 7.17 (t, *J* = 7.1 Hz, 1H), 6.70 (d, *J* = 8.6 Hz, 1H), 6.53 (t, *J* = 2.2 Hz, 1H), 3.65 (s, 3H). <sup>13</sup>C-NMR (151 MHz, Chloroform-*d*) δ 148.27, 142.73, 138.93, 136.16, 134.94, 134.17, 134.00, 129.53, 129.45, 129.40, 128.94, 128.56, 128.32, 127.32, 126.41, 126.01, 125.98, 125.95, 125.71, 120.34, 111.42, 110.83, 107.74, 29.72. **HRMS (ESI):** Calcd. for C<sub>27</sub>H<sub>20</sub>N<sub>4</sub>S [M+H]<sup>+</sup>: 433.1481; found: 433.1477.

## SPECTROSCOPIC DATA

### 11. NMR spectra of the obtained compounds.

#### (1) $^1\text{H-NMR}$ (600 MHz, $\text{CDCl}_3$ ) spectrum of 1f

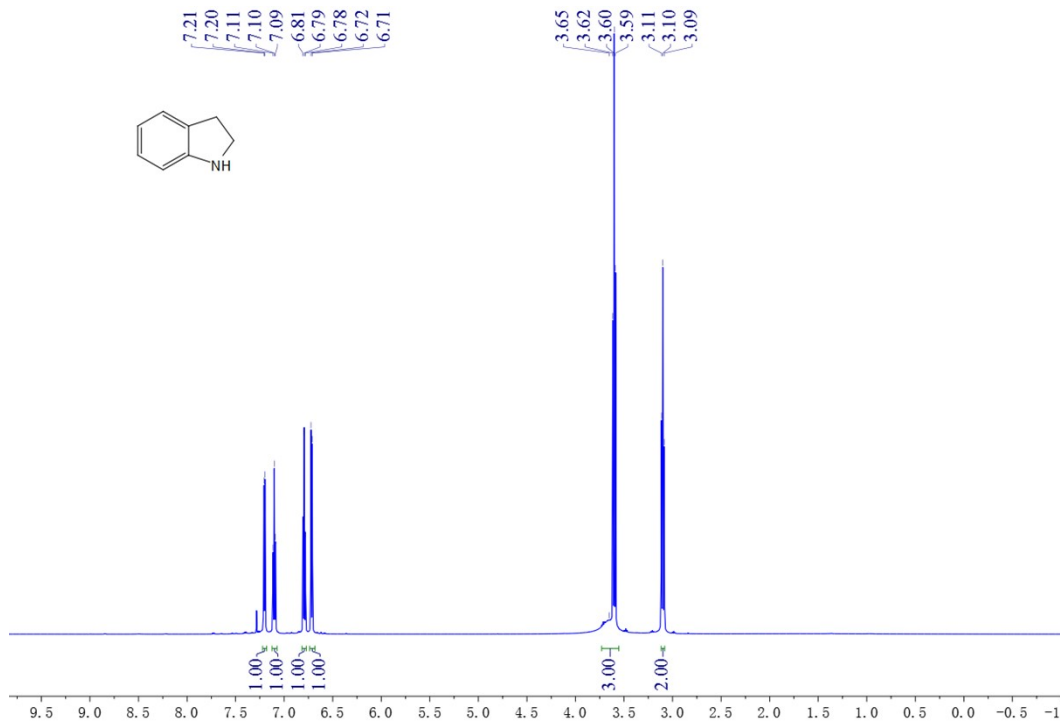

#### (2) $^1\text{H-NMR}$ (600 MHz, $\text{CDCl}_3$ ) spectrum of 2e

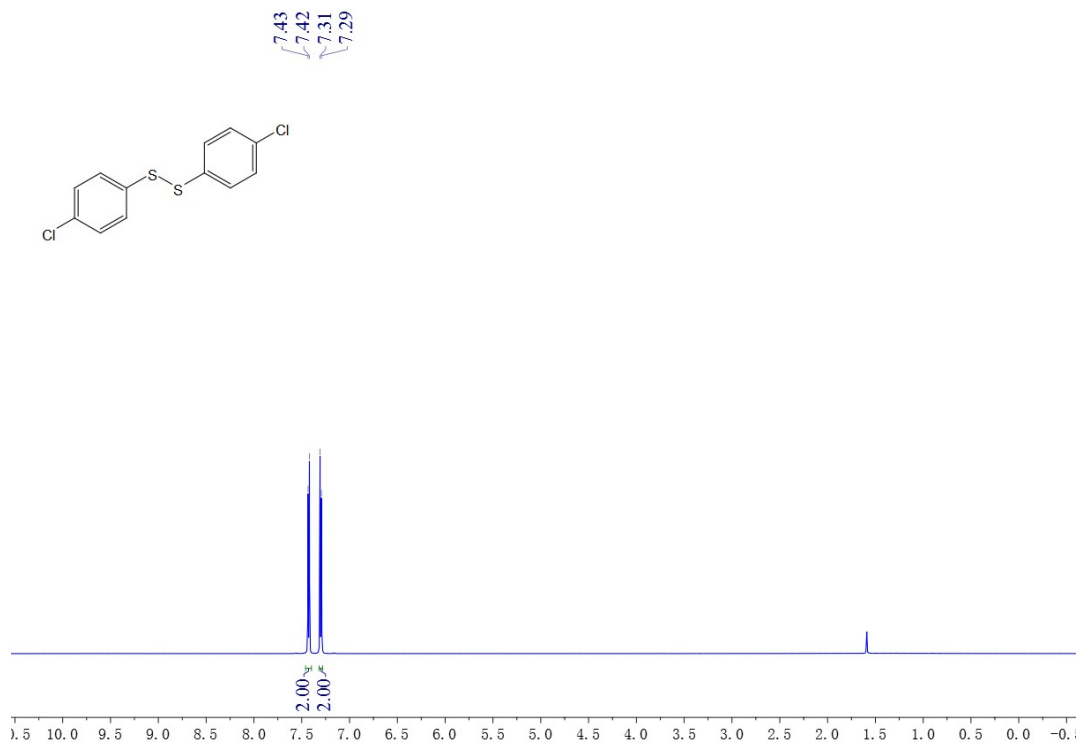

(3)  $^1\text{H-NMR}$  (600 MHz,  $\text{CDCl}_3$ ) spectrum of 2r

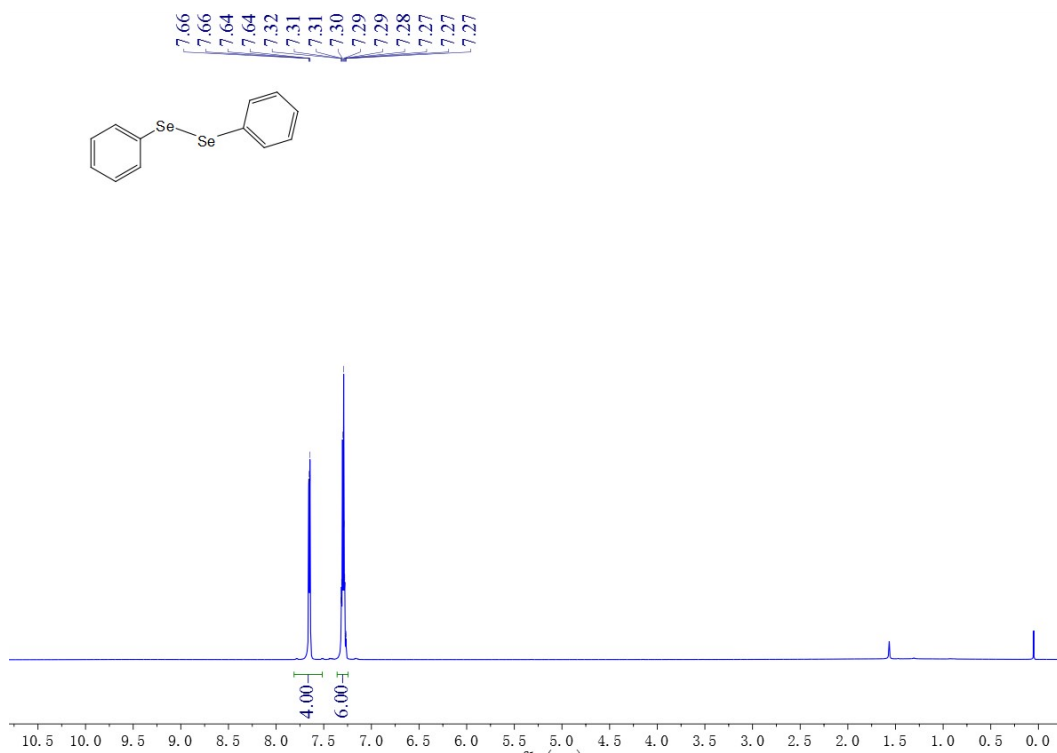

(4)  $^1\text{H-NMR}$  (600 MHz,  $\text{CDCl}_3$ ) spectrum of 1a-1

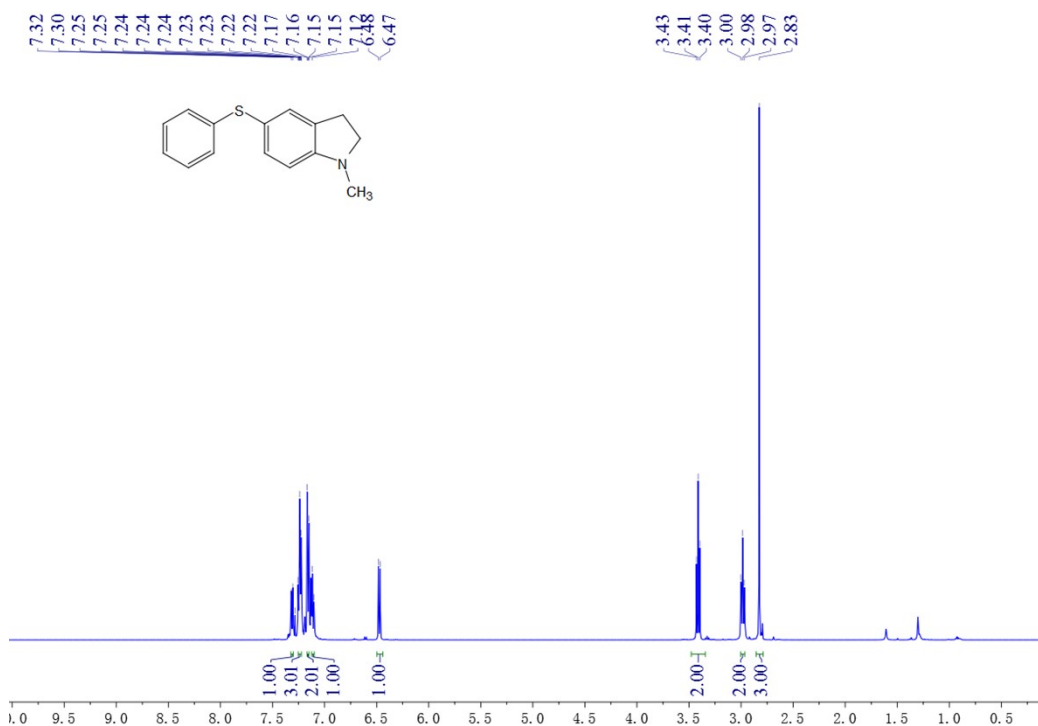

(5)  $^{13}\text{C}$ -NMR (151 MHz,  $\text{CDCl}_3$ ) spectrum of 1a-1

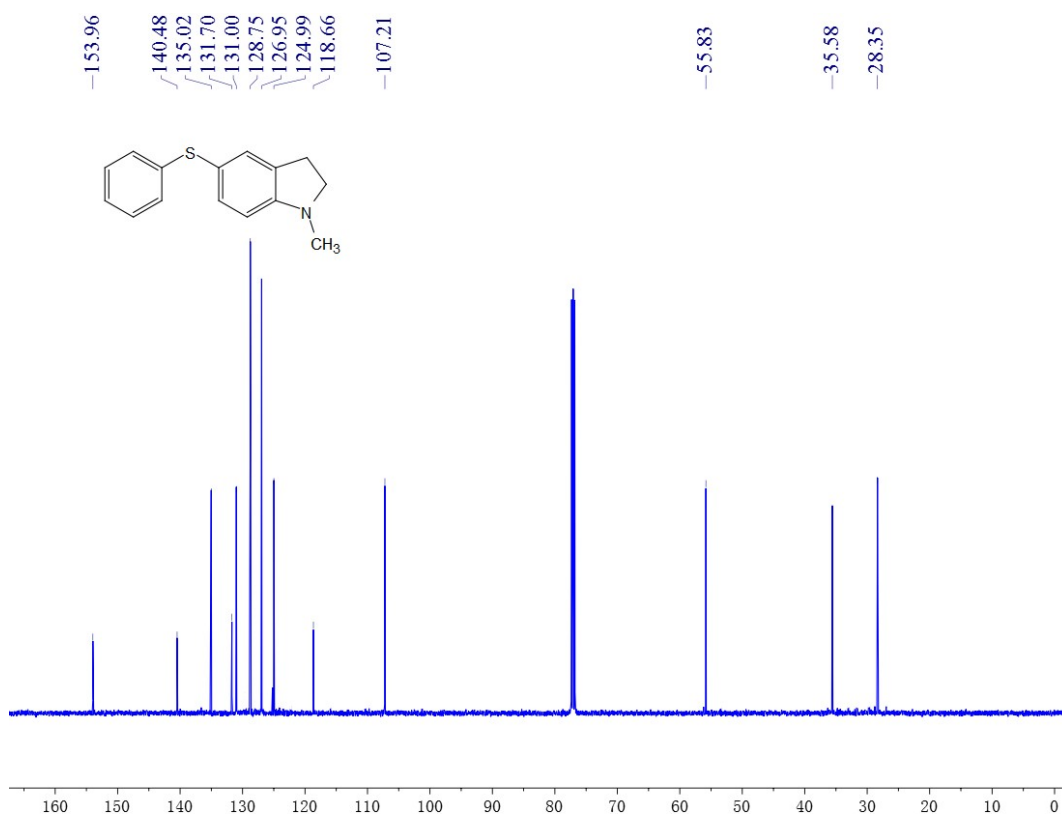

(6)  $^1\text{H}$ -NMR (600 MHz,  $\text{CDCl}_3$ ) spectrum of 1a-2

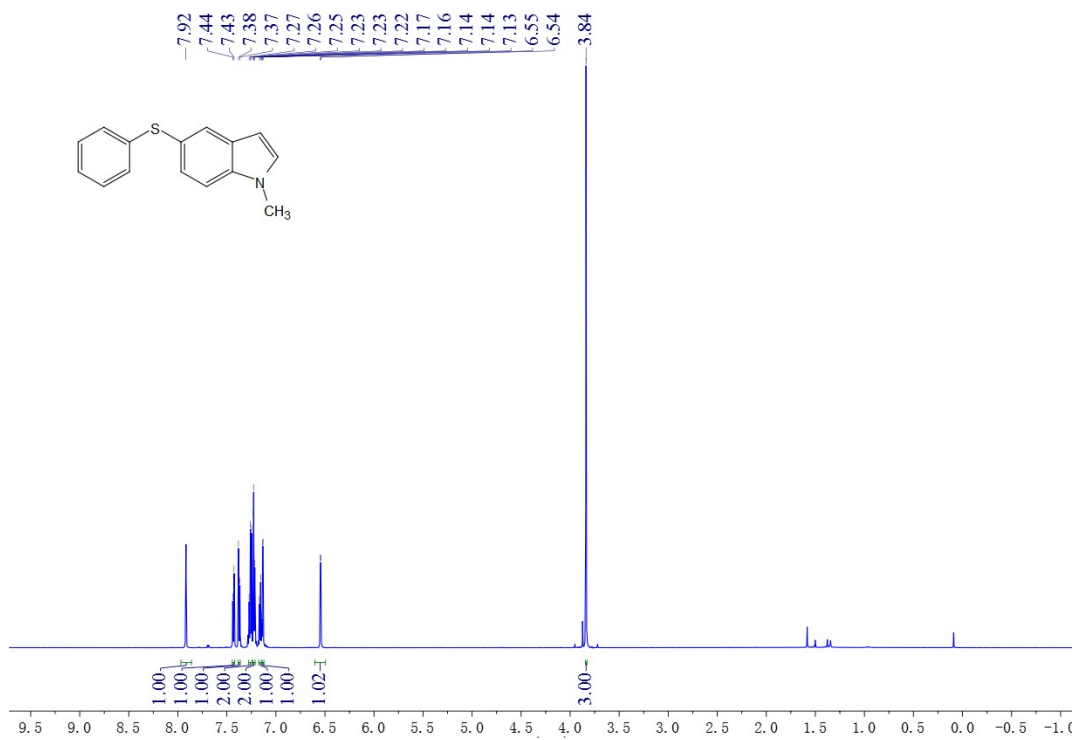

(7)  $^{13}\text{C}$ -NMR (151 MHz,  $\text{CDCl}_3$ ) spectrum of 1a-2

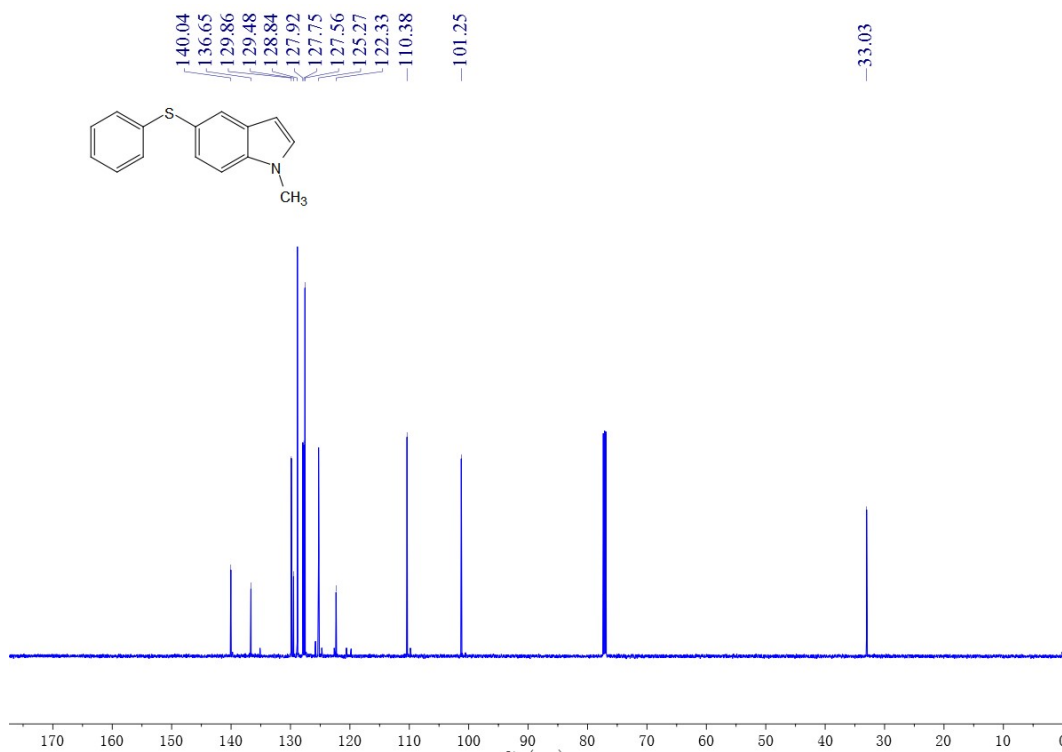

(8)  $^1\text{H}$ -NMR (600 MHz,  $\text{CDCl}_3$ ) spectrum of 1a-4

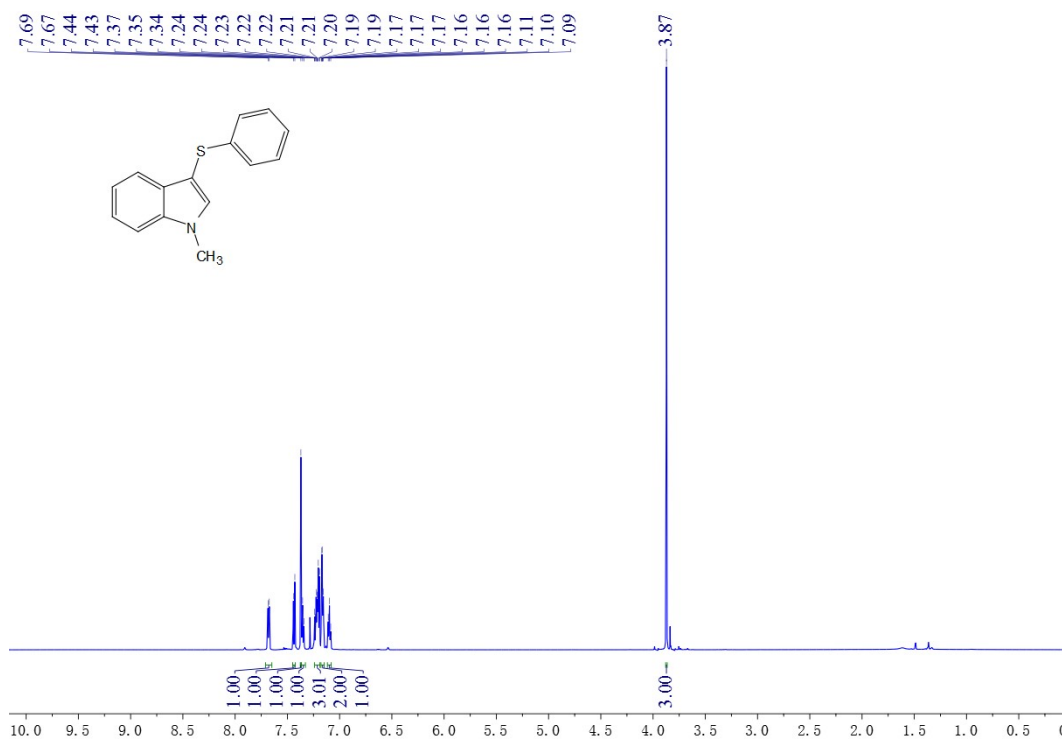

(9)  $^{13}\text{C}$ -NMR (151 MHz,  $\text{CDCl}_3$ ) spectrum of 1a-4

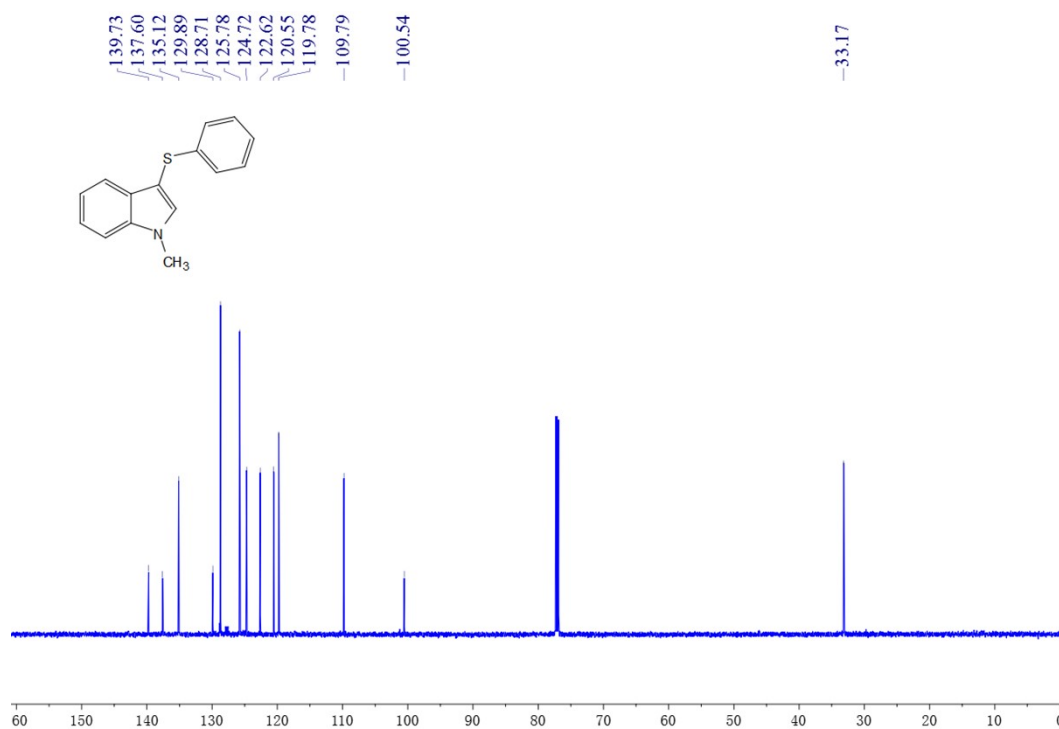

(10)  $^1\text{H}$ -NMR (600 MHz,  $\text{CDCl}_3$ ) spectrum of 4

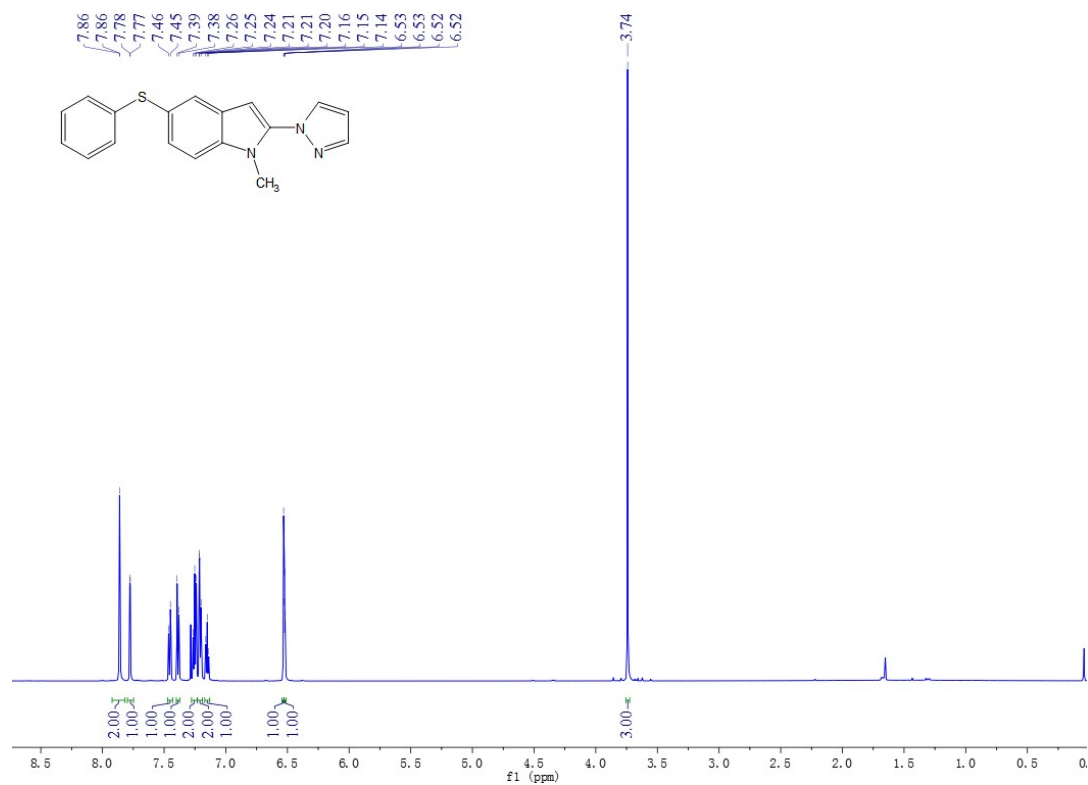

(11)  $^{13}\text{C}$ -NMR (151 MHz,  $\text{CDCl}_3$ ) spectrum of 4

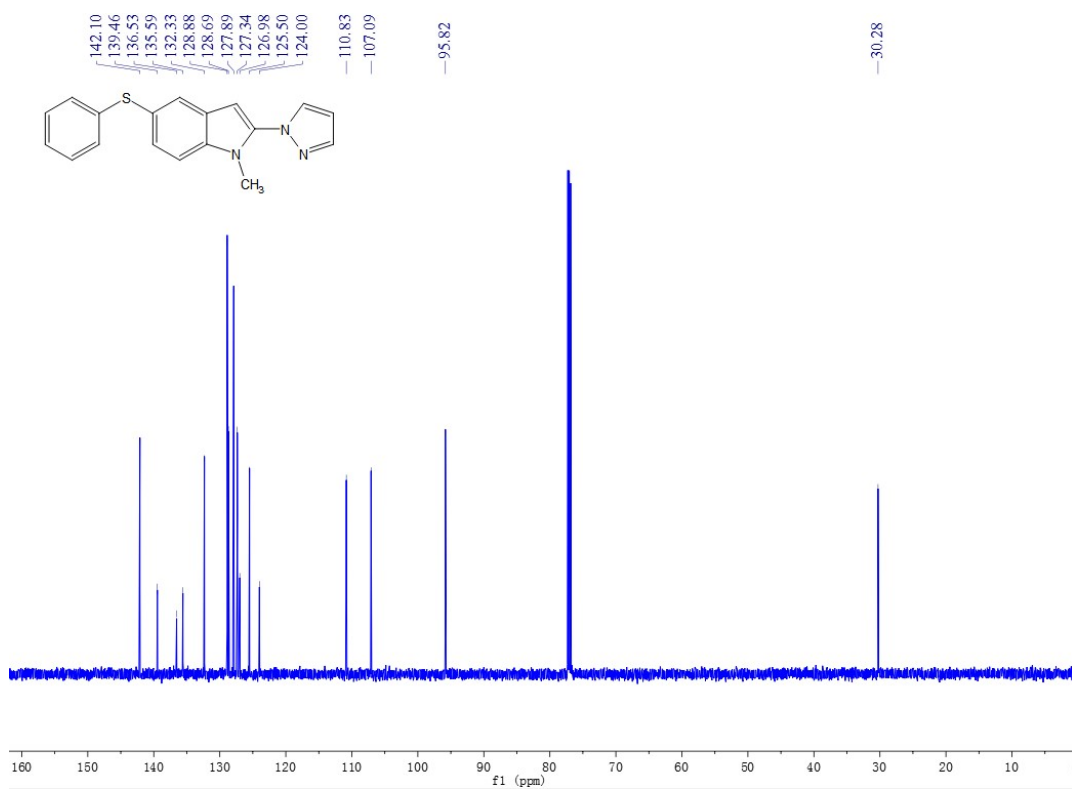

(12)  $^1\text{H}$ -NMR (600 MHz,  $\text{CDCl}_3$ ) spectrum of 5

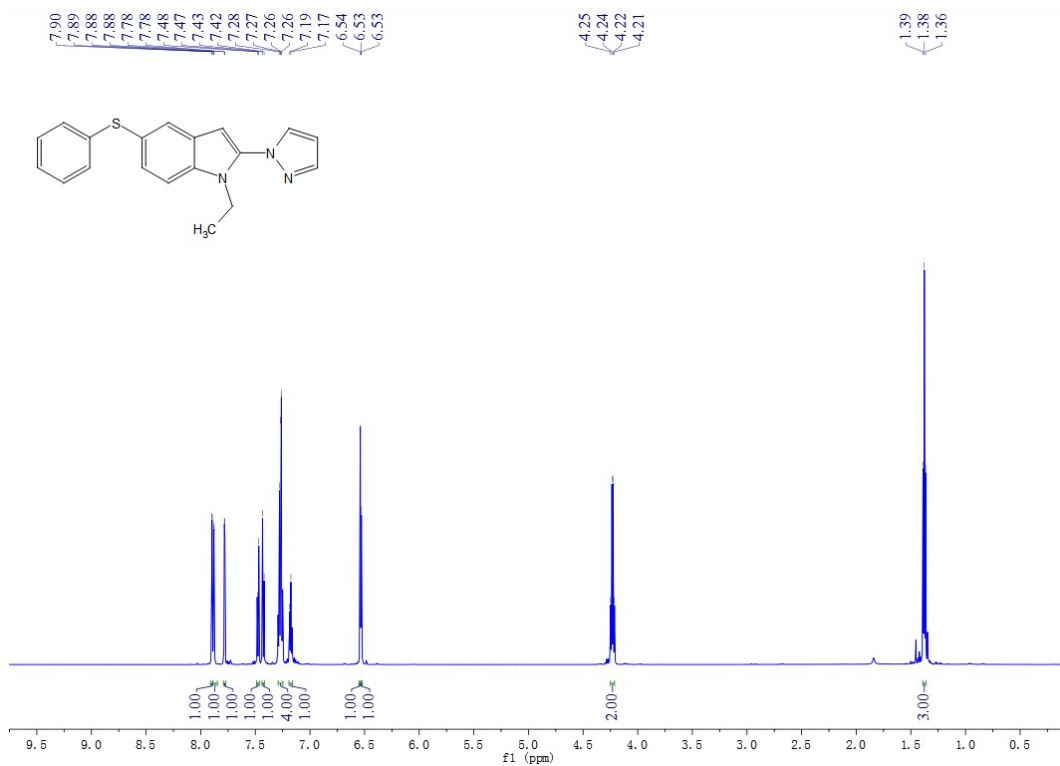



**(13)  $^{13}\text{C}$ -NMR (151 MHz,  $\text{CDCl}_3$ ) spectrum of 5**

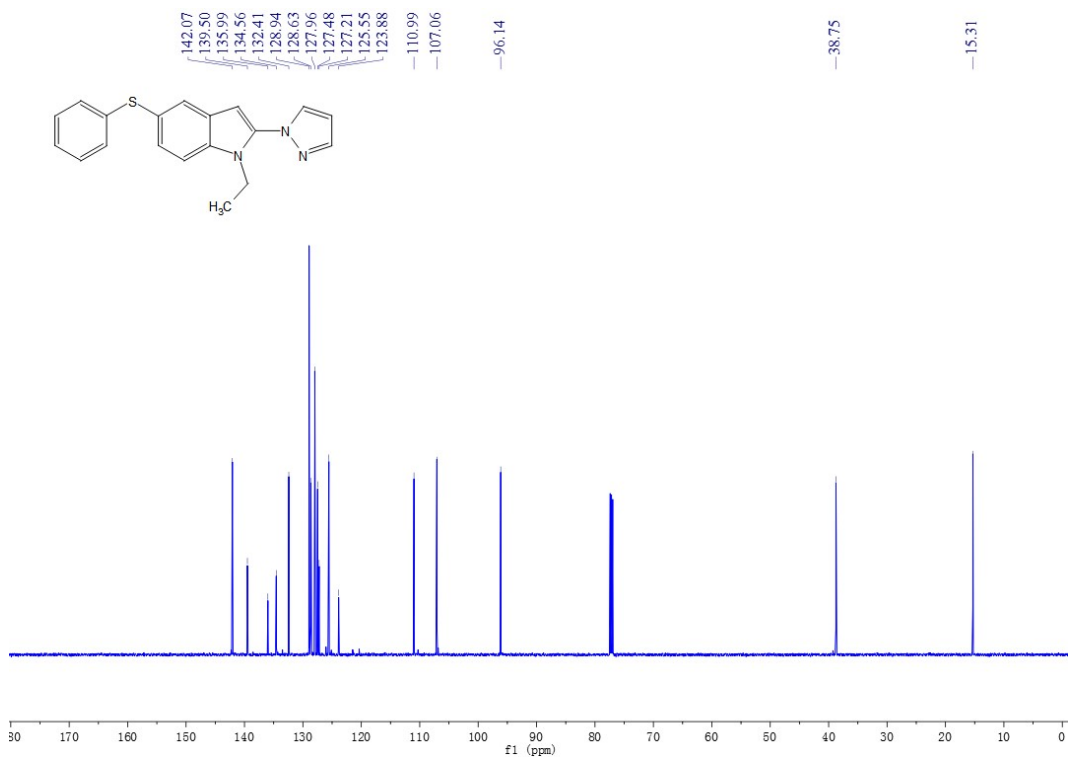

**(14)  $^1\text{H}$ -NMR (600 MHz,  $\text{CDCl}_3$ ) spectrum of 6**

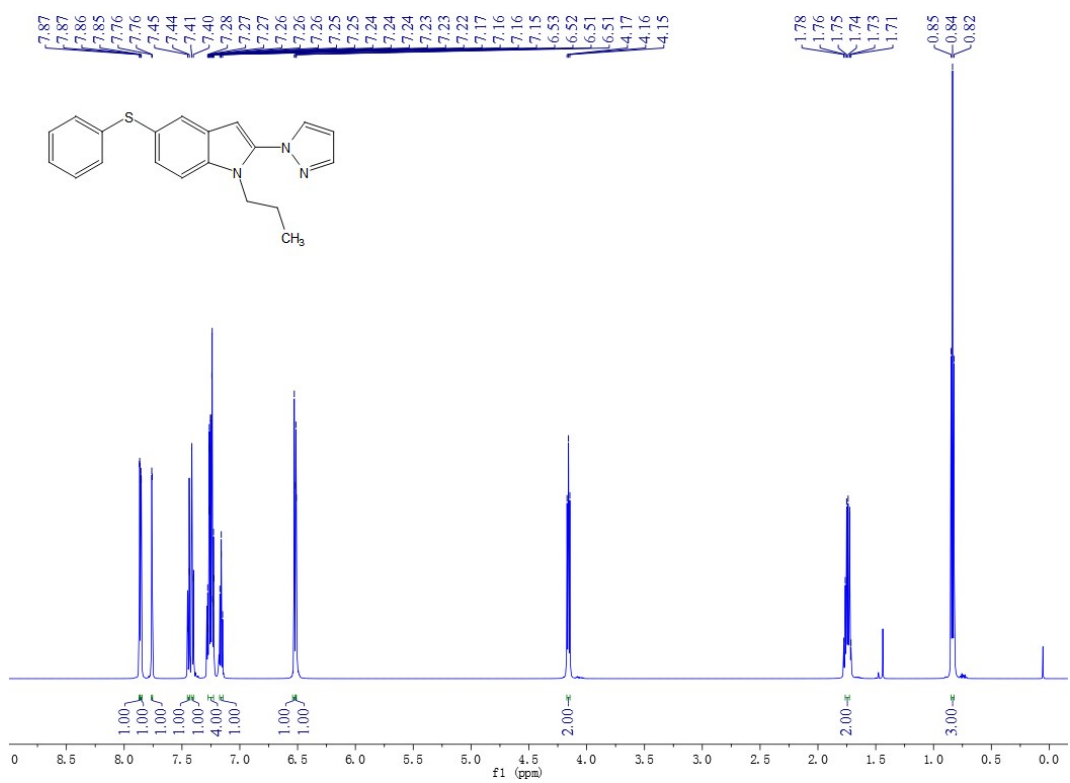



(17)  $^{13}\text{C}$ -NMR (151 MHz,  $\text{CDCl}_3$ ) spectrum of 7

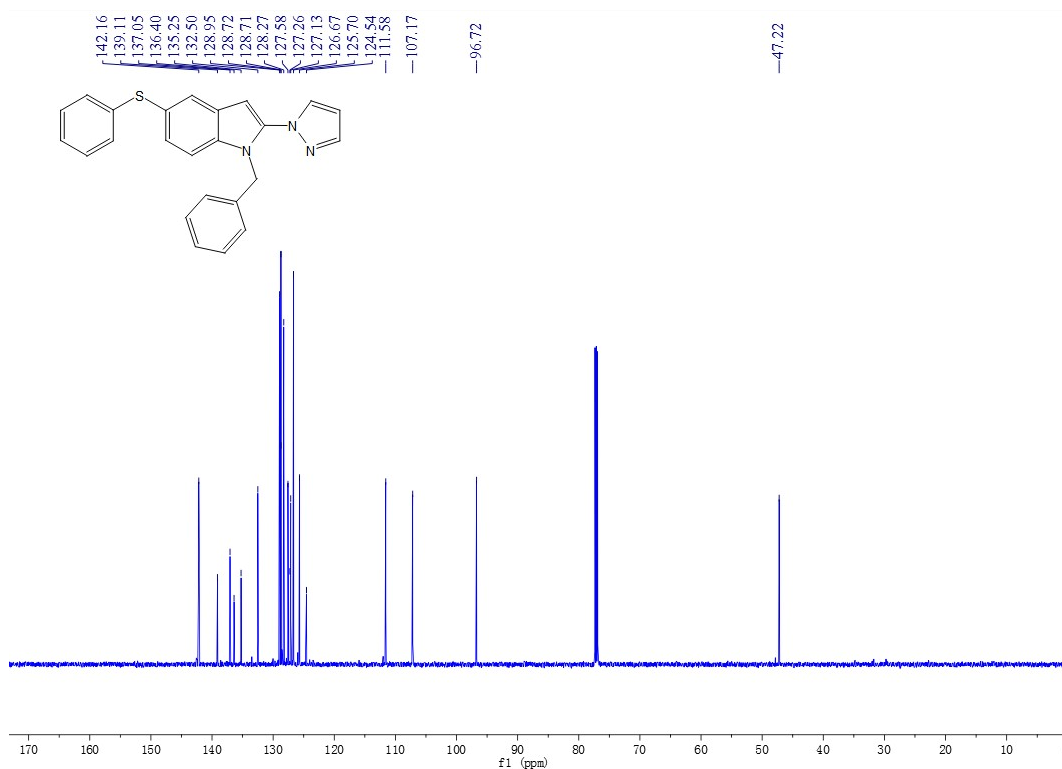

(18)  $^1\text{H}$ -NMR (600 MHz,  $\text{CDCl}_3$ ) spectrum of 9

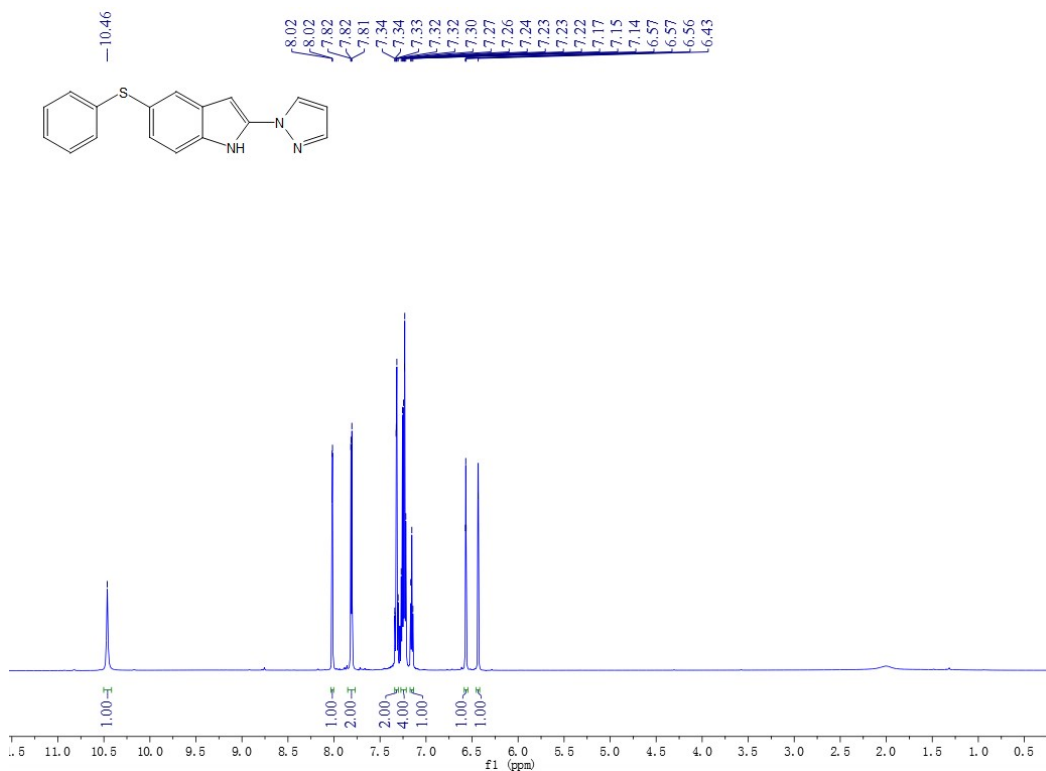

**(19)  $^{13}\text{C}$ -NMR (151 MHz,  $\text{CDCl}_3$ ) spectrum of 9**

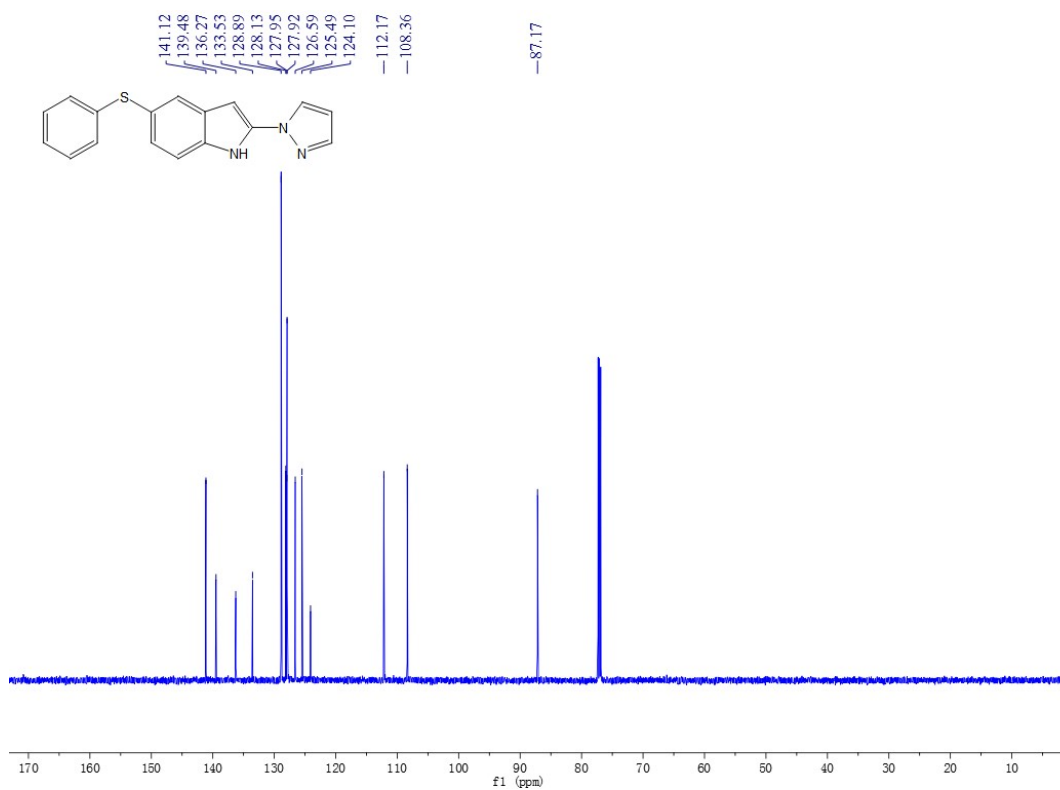

**(20)  $^1\text{H}$ -NMR (600 MHz,  $\text{CDCl}_3$ ) spectrum of 10**

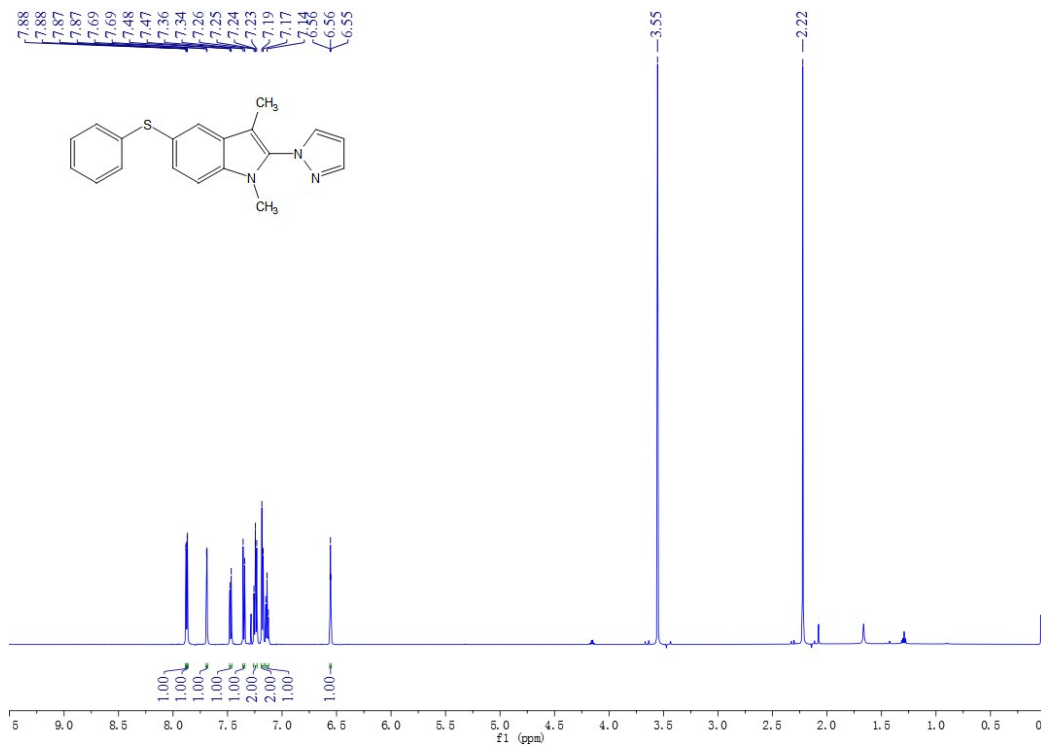

(21)  $^{13}\text{C}$ -NMR (151 MHz,  $\text{CDCl}_3$ ) spectrum of 10

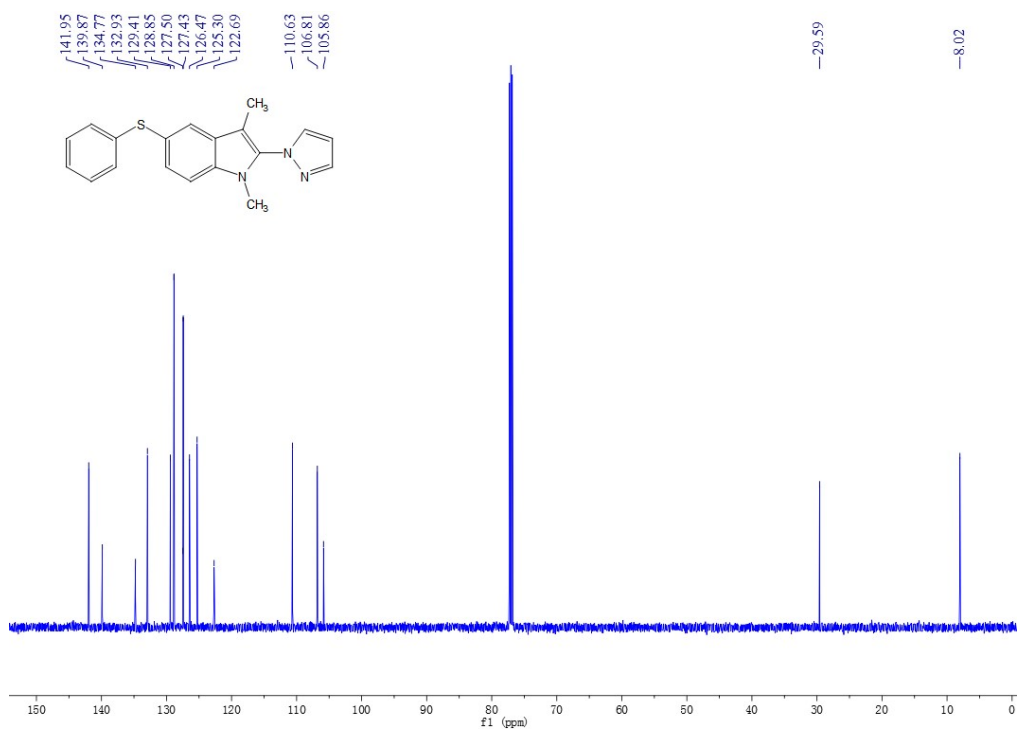

(22)  $^1\text{H}$ -NMR (600 MHz,  $\text{CDCl}_3$ ) spectrum of 11

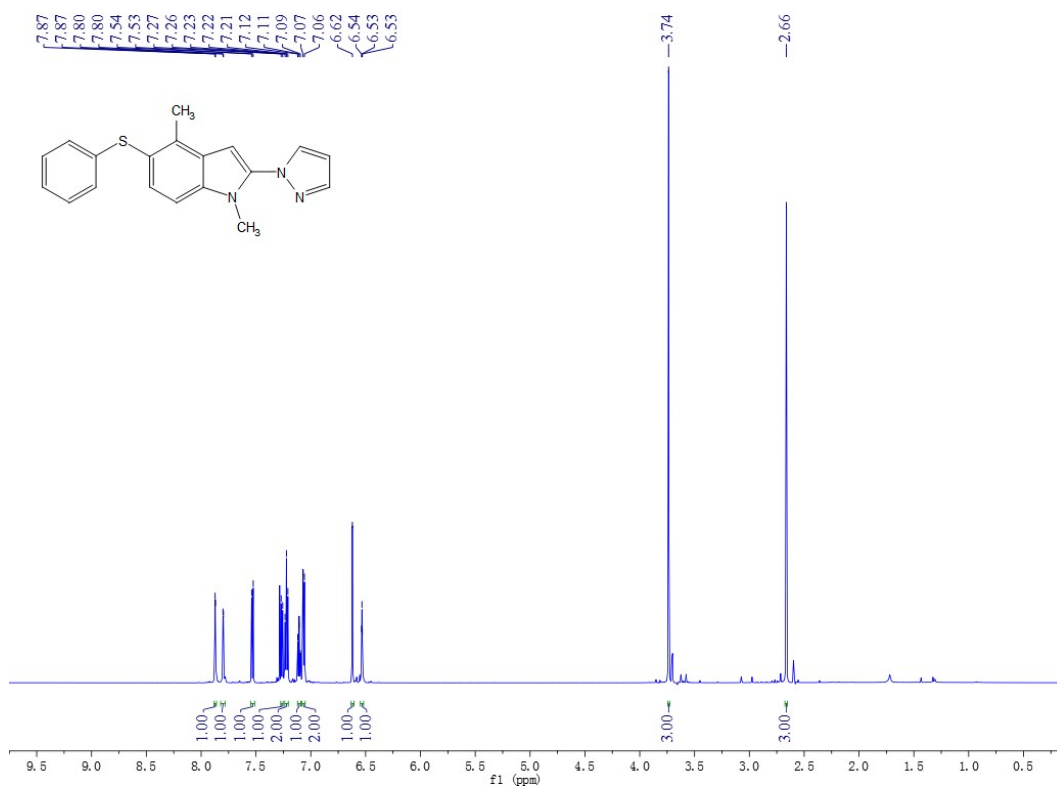

(23)  $^{13}\text{C}$ -NMR (151 MHz,  $\text{CDCl}_3$ ) spectrum of 11

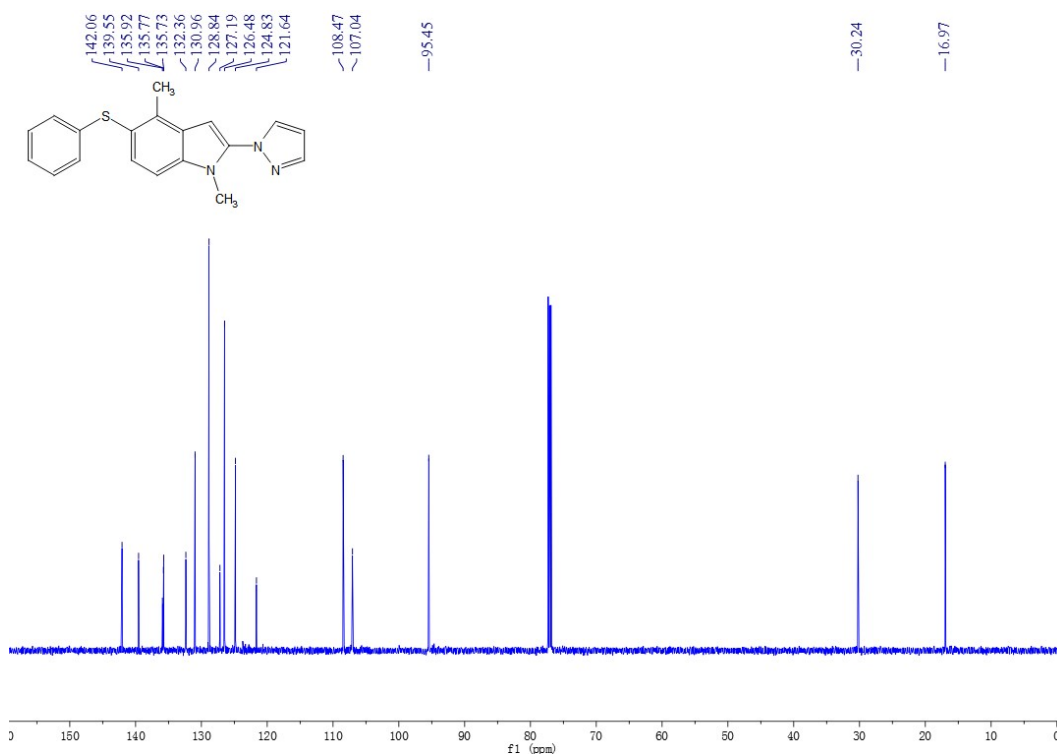

(24)  $^1\text{H}$ -NMR (600 MHz,  $\text{CDCl}_3$ ) spectrum of 12

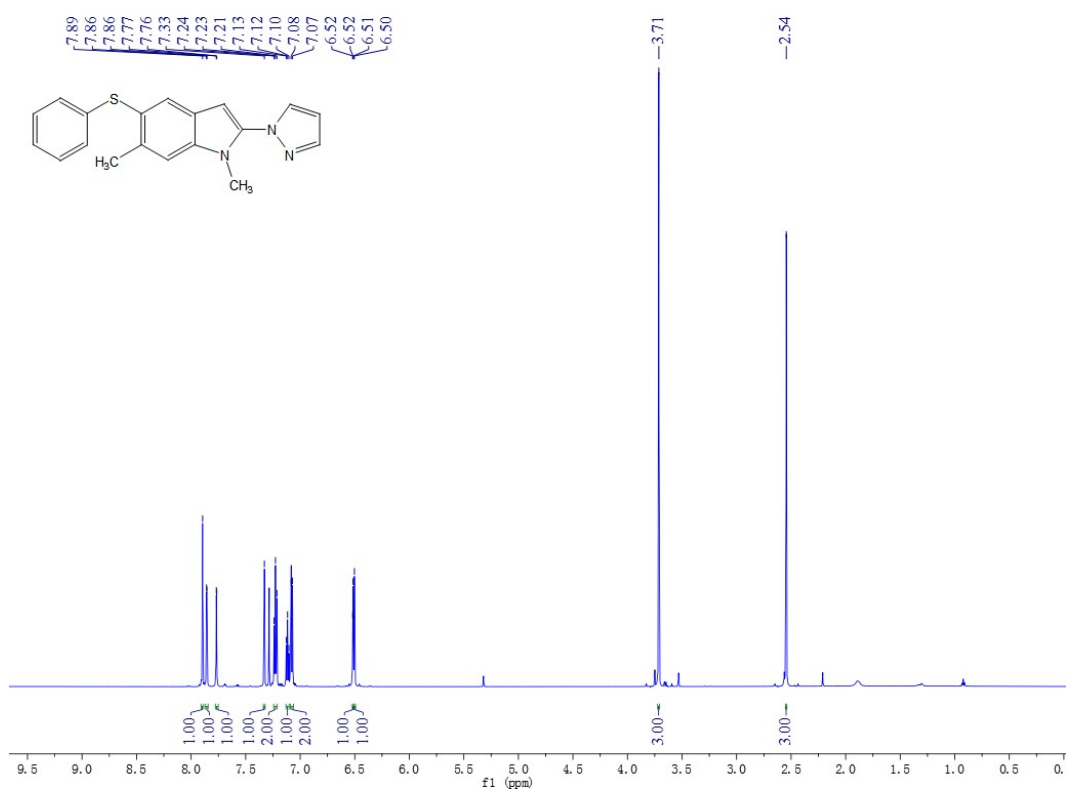

**(25)  $^{13}\text{C}$ -NMR (151 MHz,  $\text{CDCl}_3$ ) spectrum of 12**

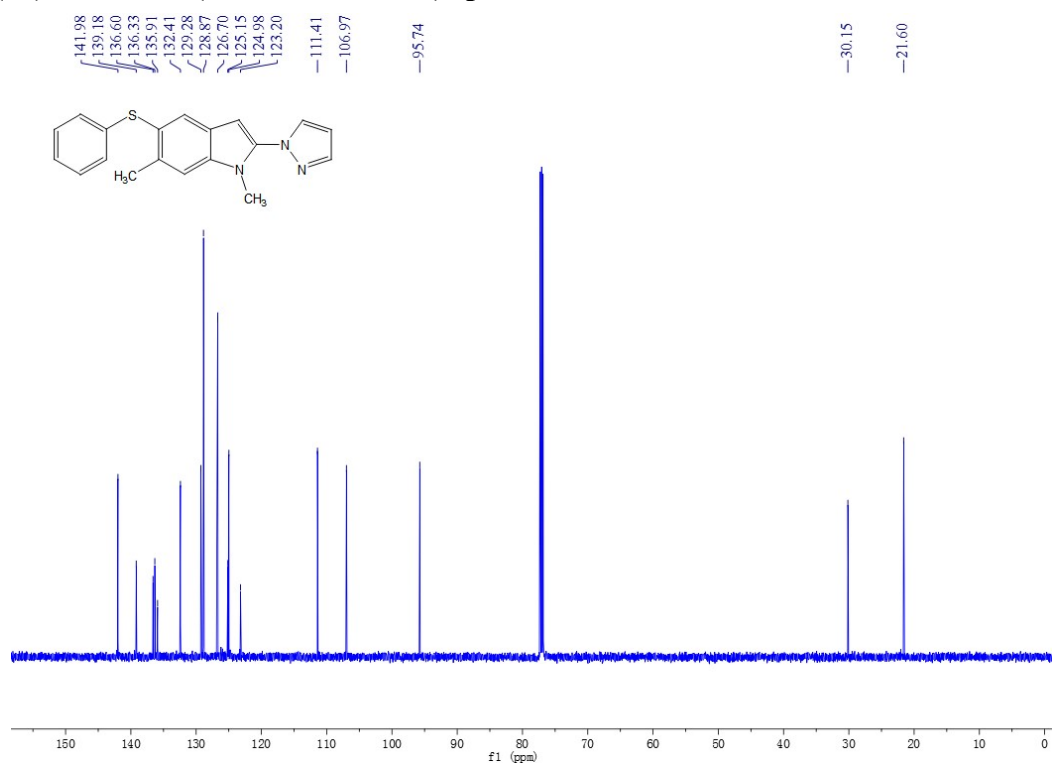

**(26)  $^1\text{H}$ -NMR (600 MHz,  $\text{CDCl}_3$ ) spectrum of 13**

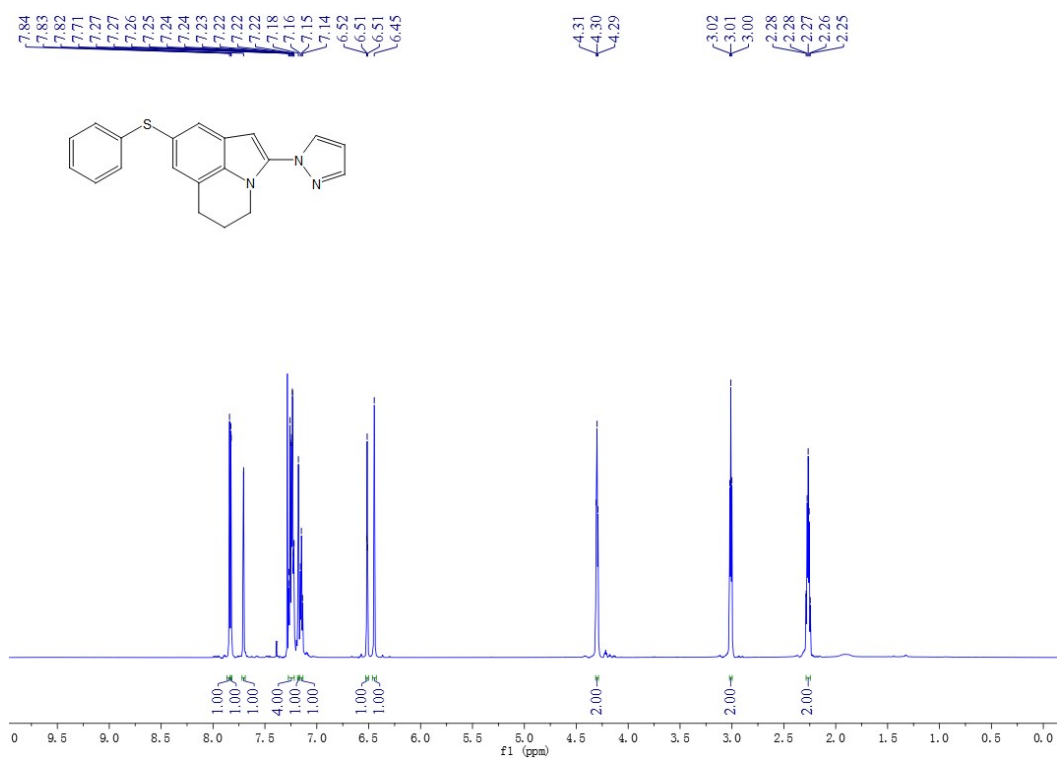

**(27)  $^{13}\text{C}$ -NMR (151 MHz,  $\text{CDCl}_3$ ) spectrum of 13**

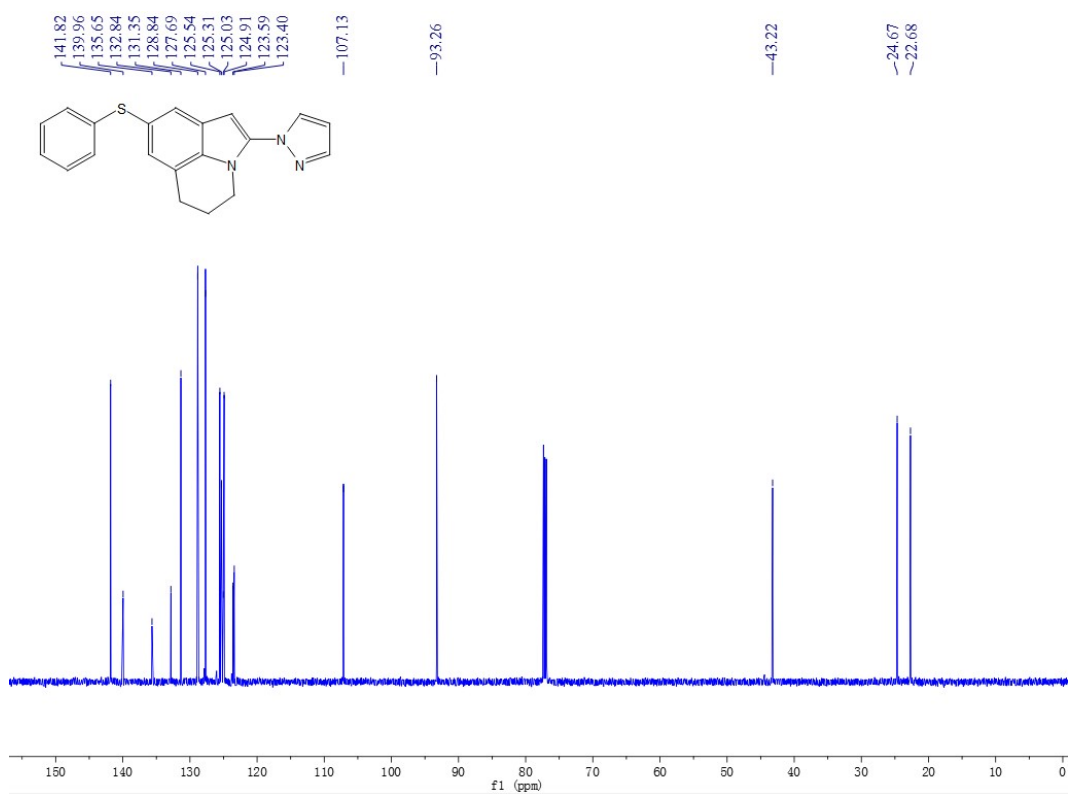

**(28)  $^1\text{H}$ -NMR (600 MHz,  $\text{CDCl}_3$ ) spectrum of 14**

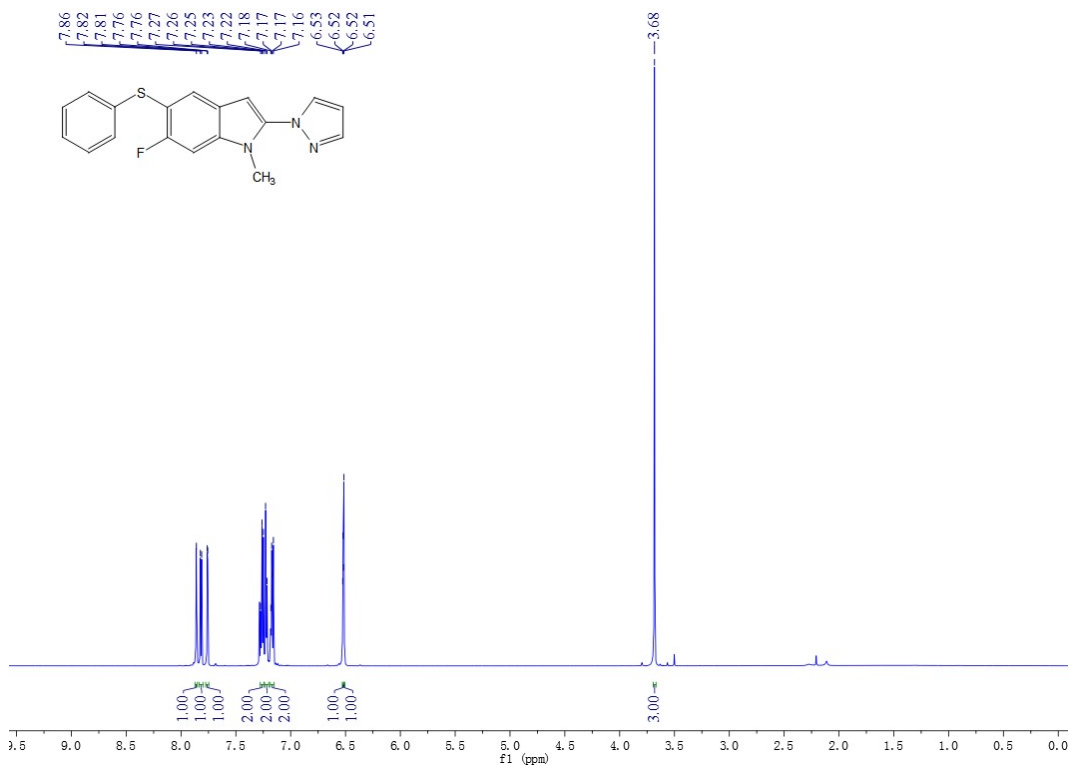



**(29)  $^{13}\text{C}$ -NMR (151 MHz,  $\text{CDCl}_3$ ) spectrum of 14**

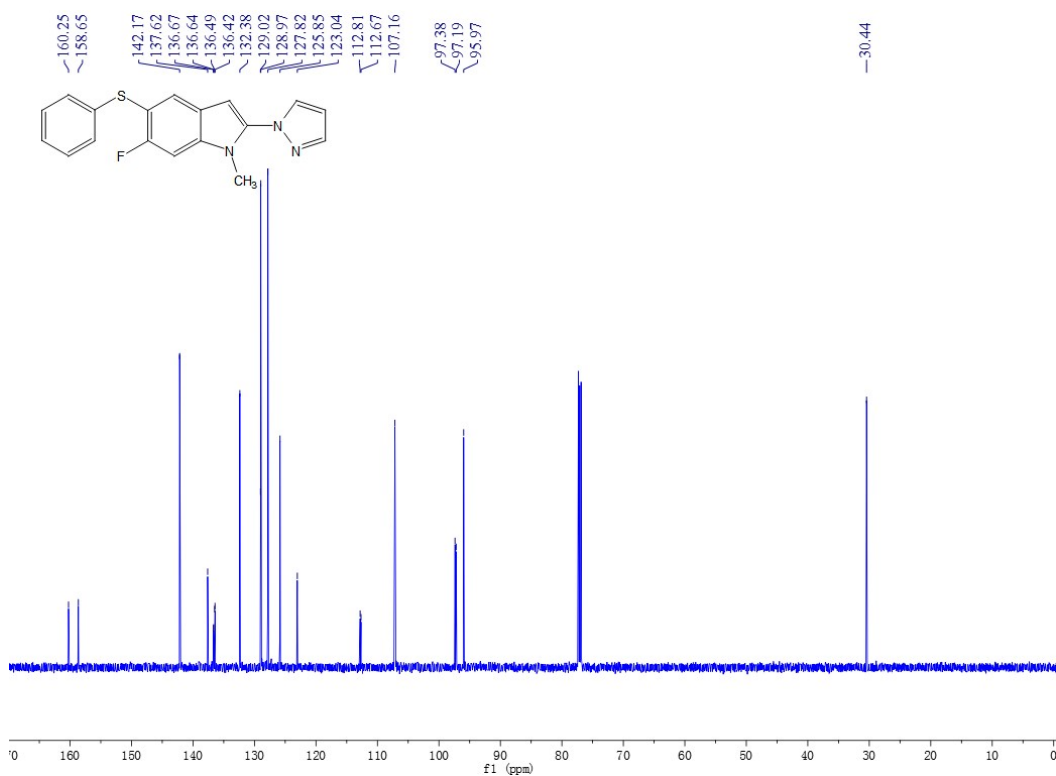

**(30)  $^{19}\text{F}$ -NMR (565 MHz,  $\text{CDCl}_3$ ) spectrum of 14**

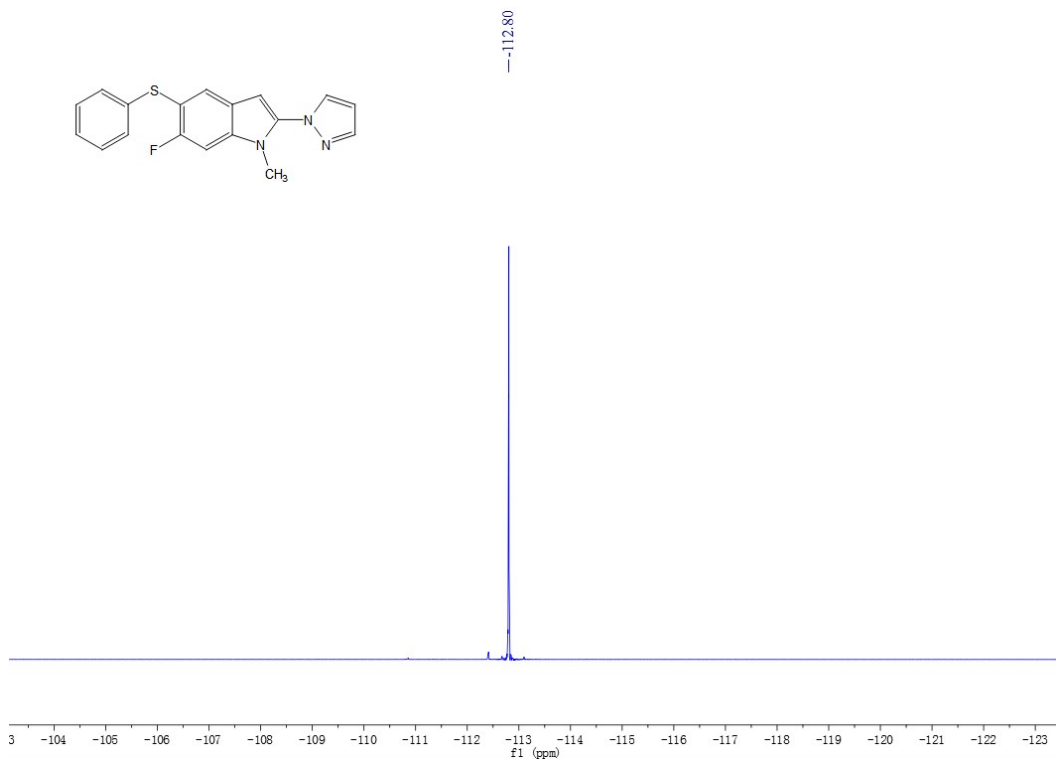

**(31)  $^1\text{H-NMR}$  (600 MHz,  $\text{CDCl}_3$ ) spectrum of 15**

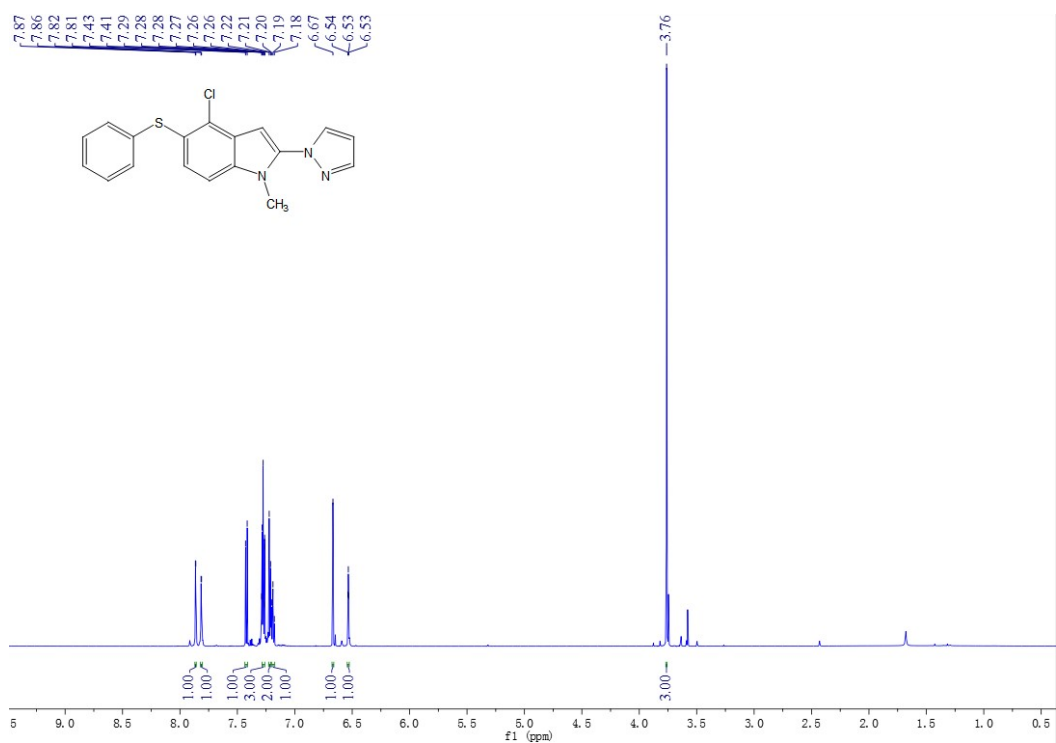

**(32)  $^{13}\text{C-NMR}$  (151 MHz,  $\text{CDCl}_3$ ) spectrum of 15**

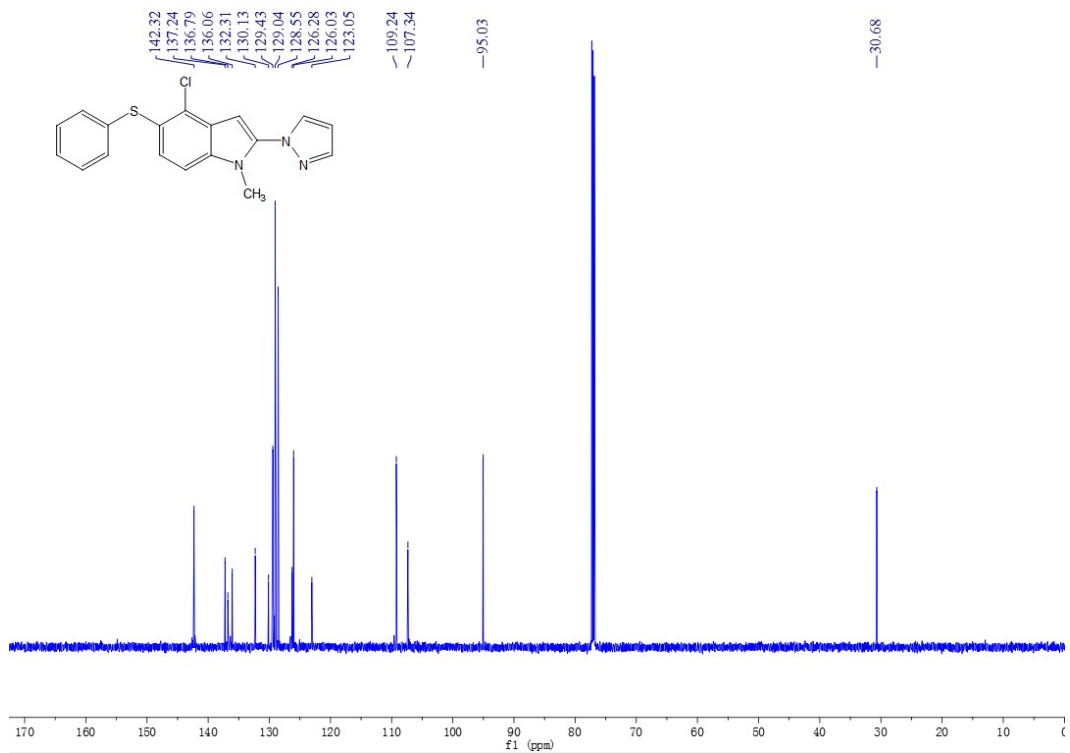

**(33)  $^1\text{H-NMR}$  (600 MHz,  $\text{CDCl}_3$ ) spectrum of 16**

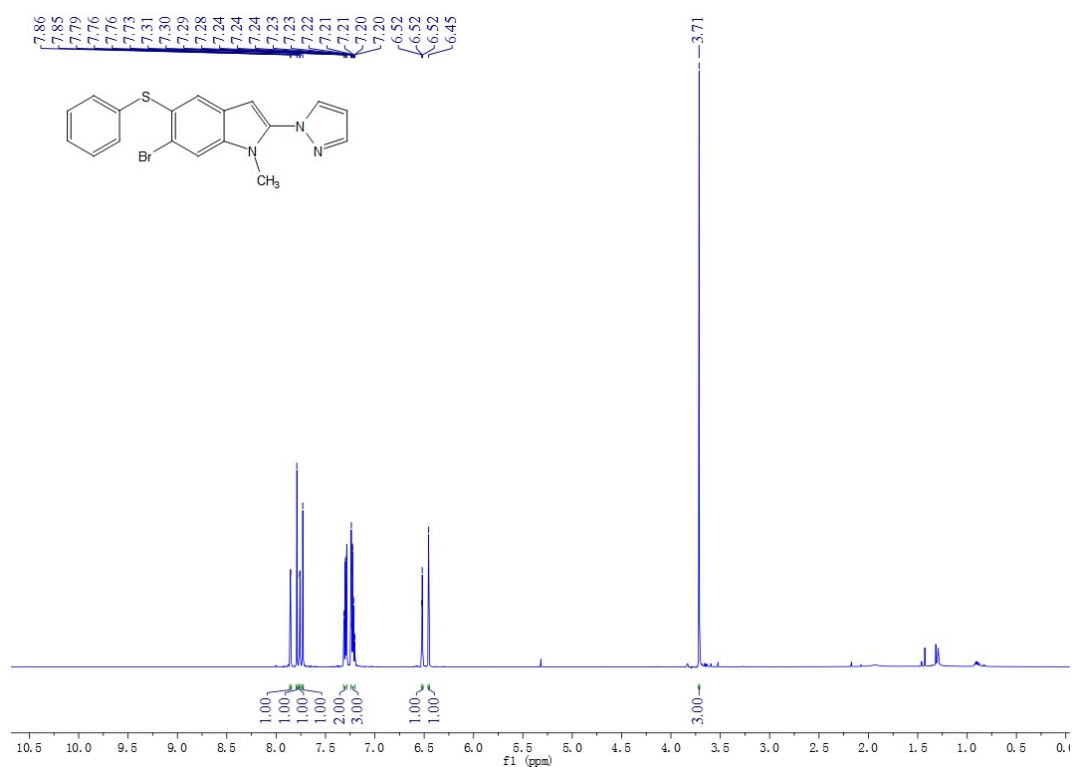

**(34)  $^{13}\text{C-NMR}$  (151 MHz,  $\text{CDCl}_3$ ) spectrum of 16**

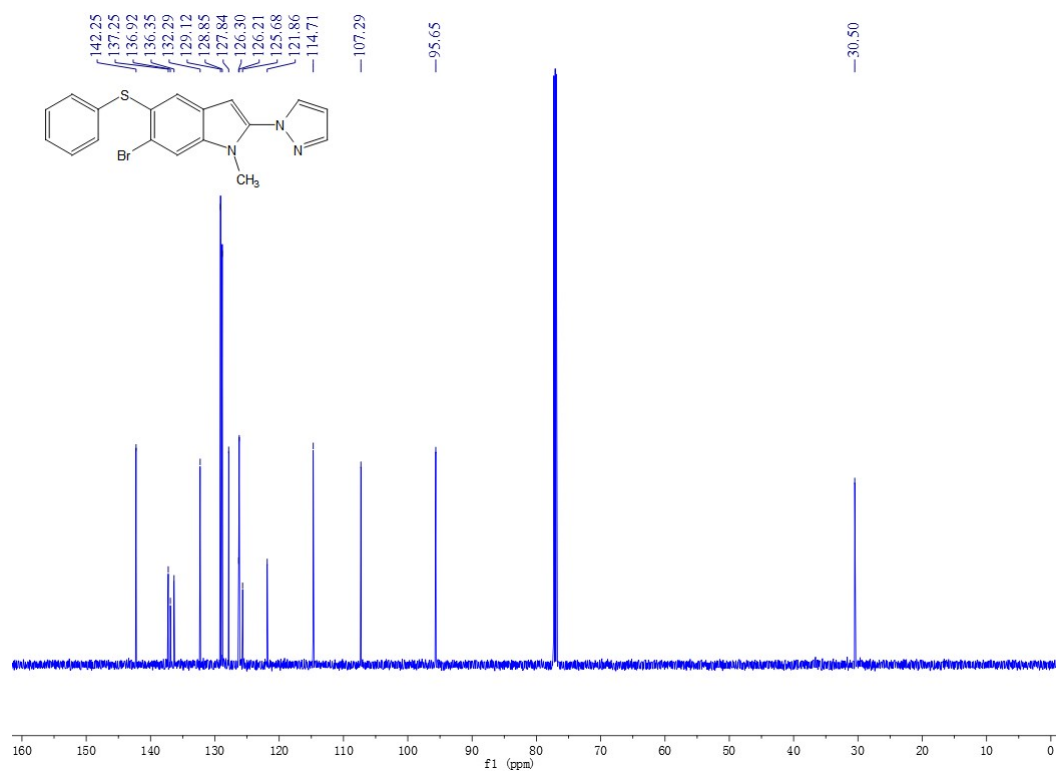

**(35)  $^1\text{H-NMR}$  (600 MHz,  $\text{CDCl}_3$ ) spectrum of 17**

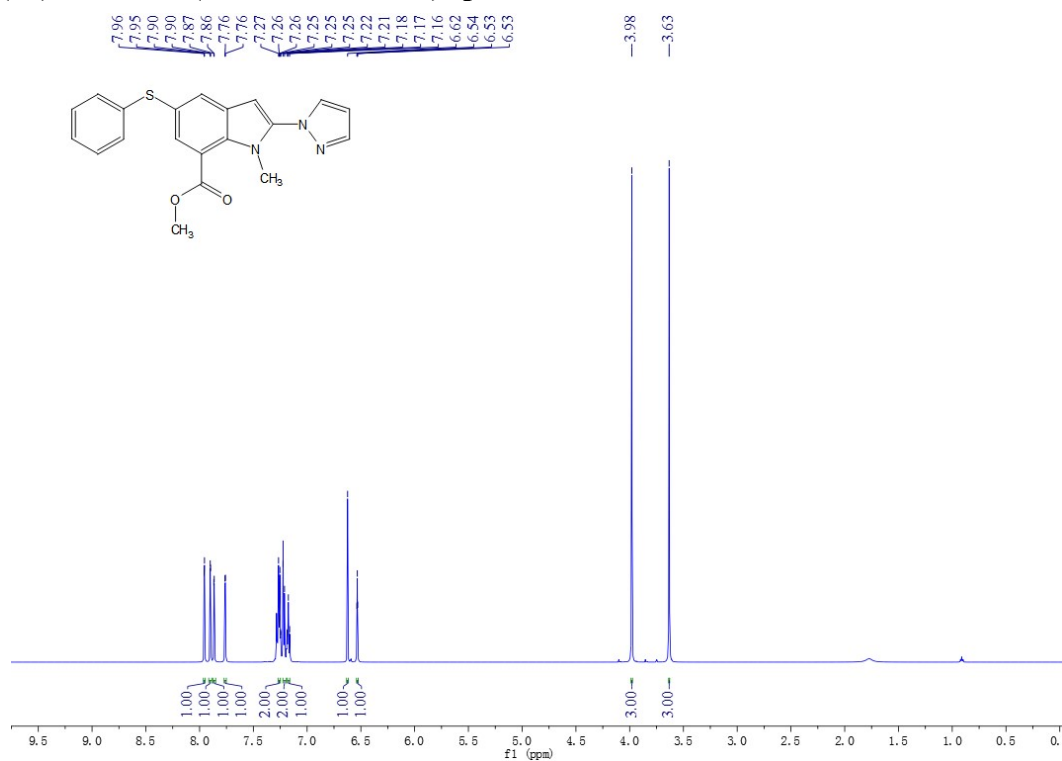

**(36)  $^{13}\text{C-NMR}$  (151 MHz,  $\text{CDCl}_3$ ) spectrum of 17**

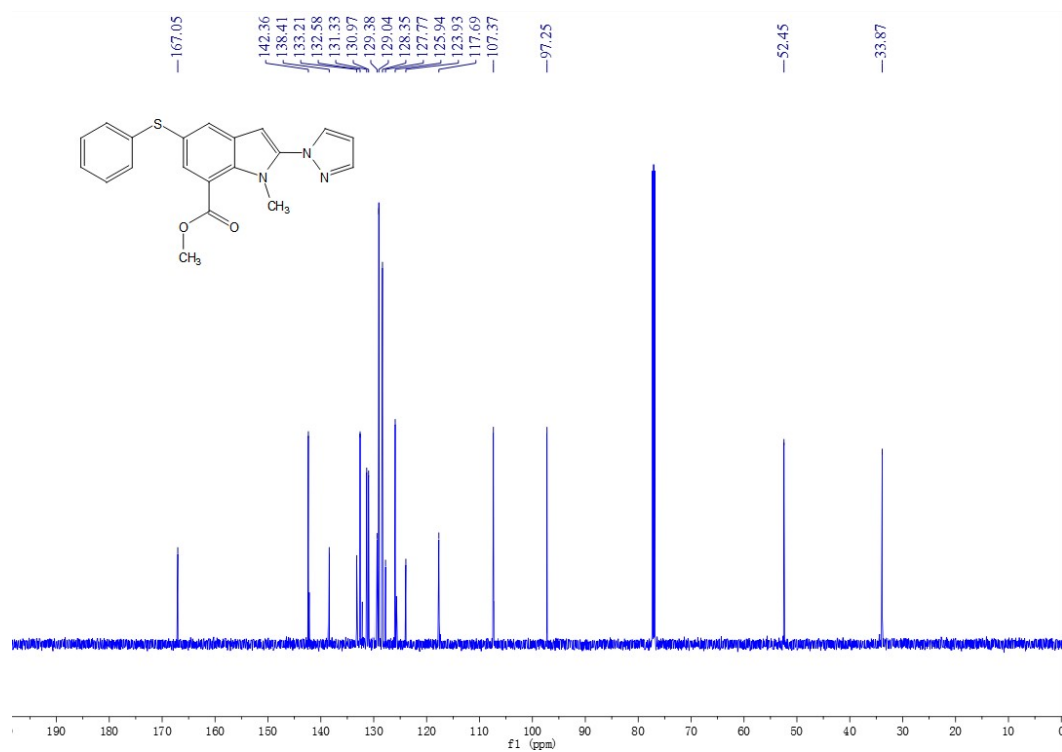

**(37)  $^1\text{H-NMR}$  (600 MHz,  $\text{CDCl}_3$ ) spectrum of 18**

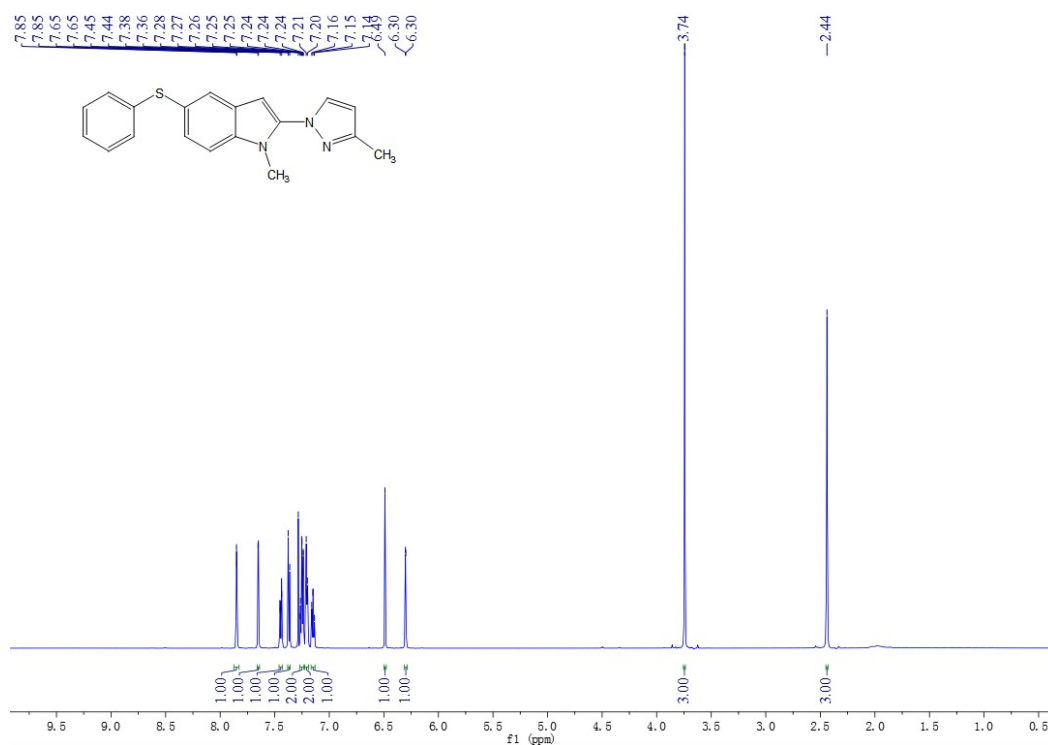

**(38)  $^{13}\text{C-NMR}$  (151 MHz,  $\text{CDCl}_3$ ) spectrum of 18**

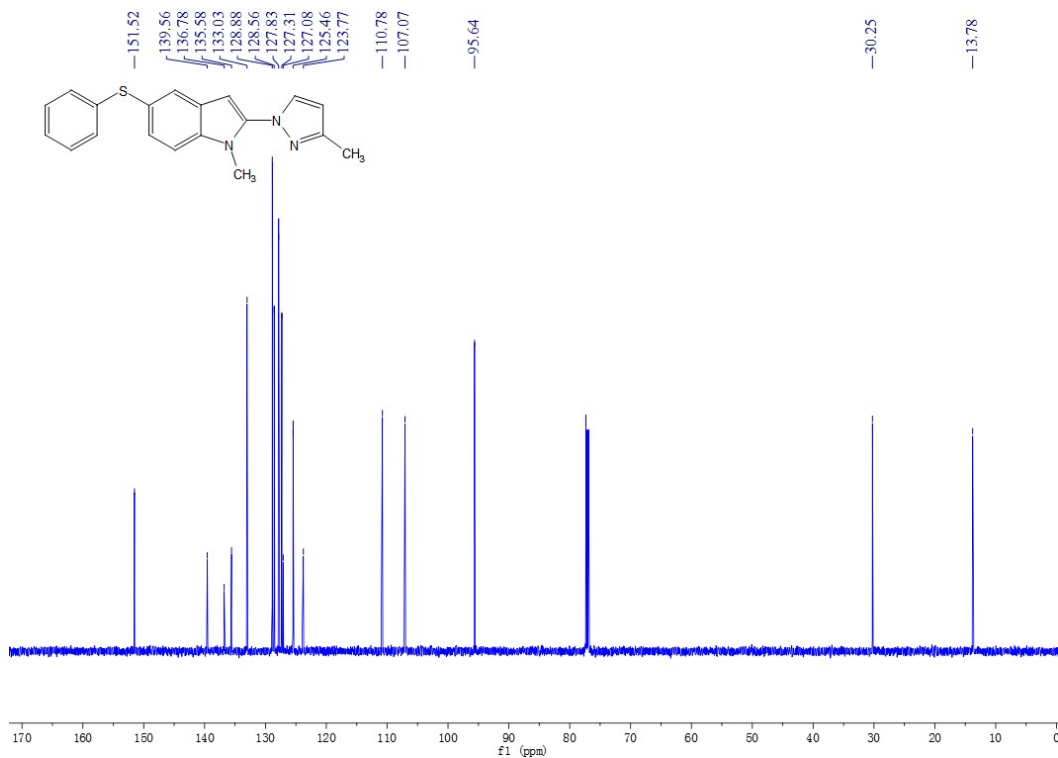

**(39)  $^1\text{H-NMR}$  (600 MHz,  $\text{CDCl}_3$ ) spectrum of 19**

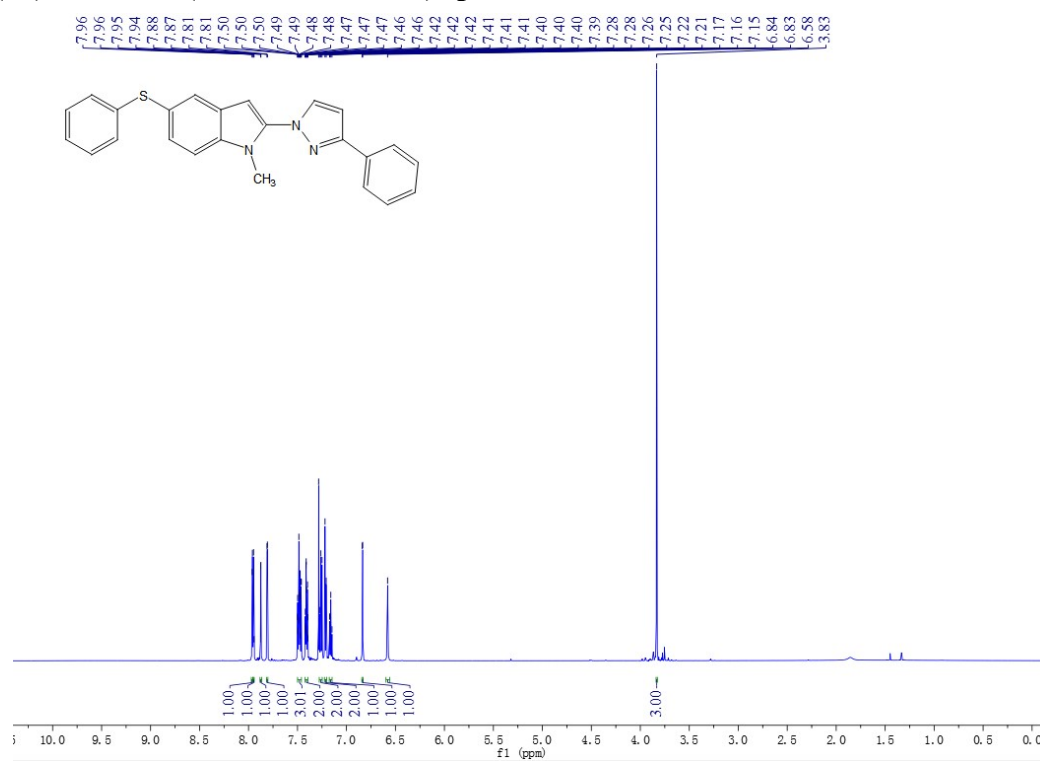

**(40)  $^{13}\text{C-NMR}$  (151 MHz,  $\text{CDCl}_3$ ) spectrum of 19**

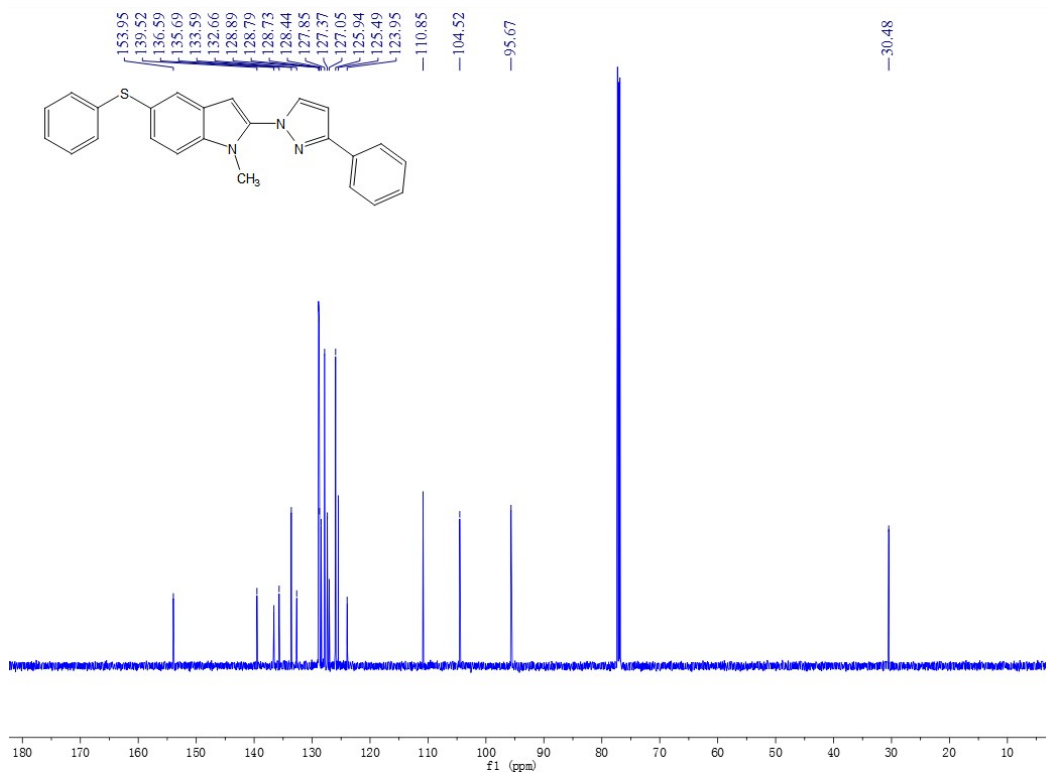

**(41)  $^1\text{H-NMR}$  (600 MHz,  $\text{CDCl}_3$ ) spectrum of 20**

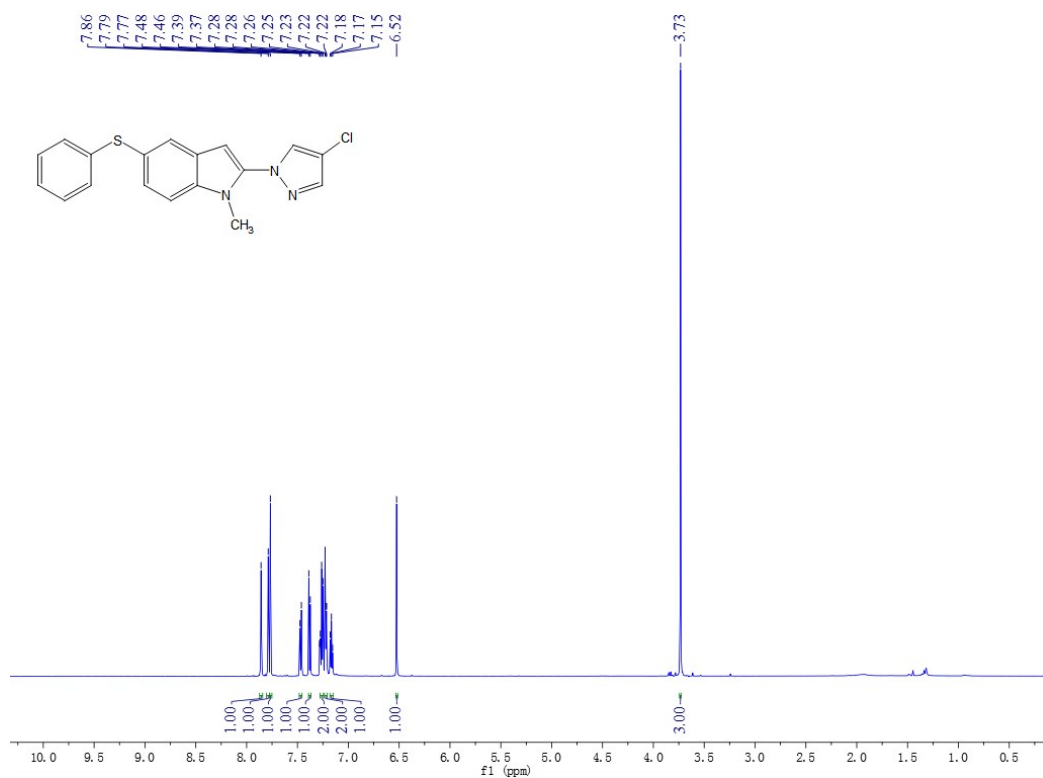

**(42)  $^{13}\text{C-NMR}$  (151 MHz,  $\text{CDCl}_3$ ) spectrum of 20**

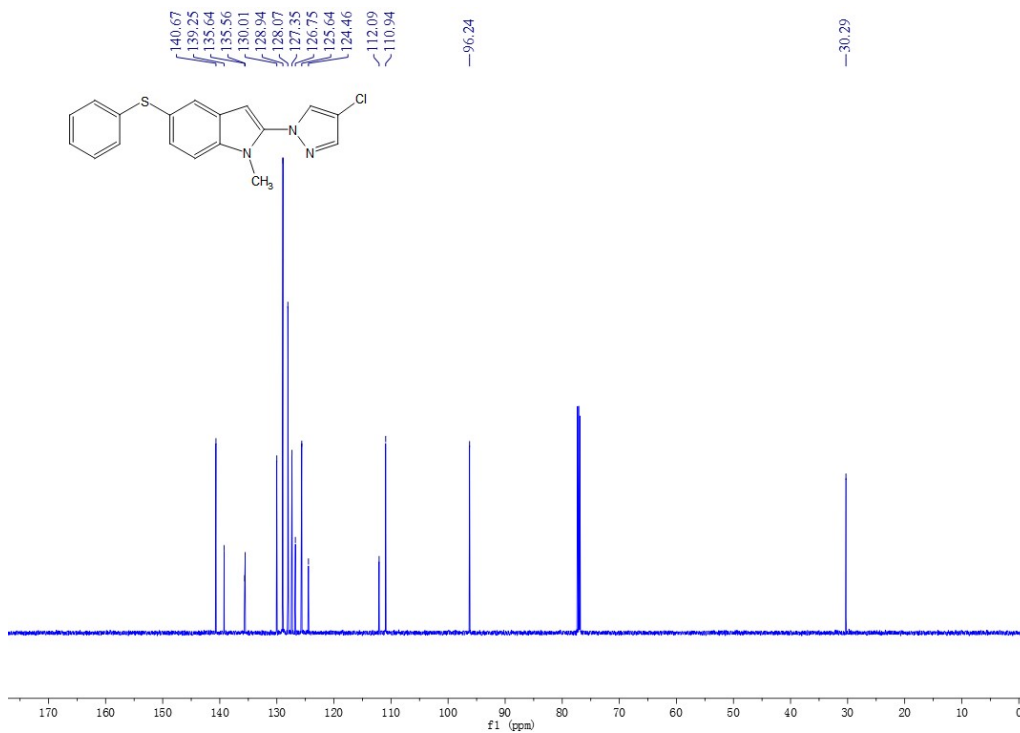

(43)  $^1\text{H-NMR}$  (600 MHz,  $\text{CDCl}_3$ ) spectrum of 21

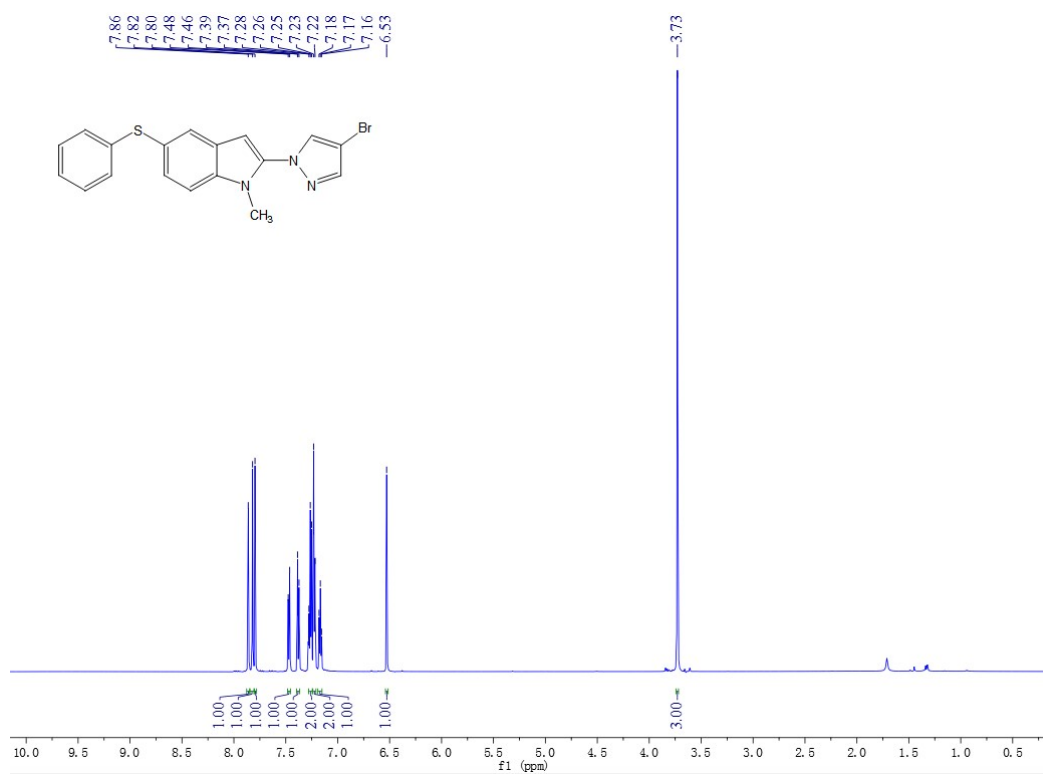

(44)  $^{13}\text{C-NMR}$  (151 MHz,  $\text{CDCl}_3$ ) spectrum of 21

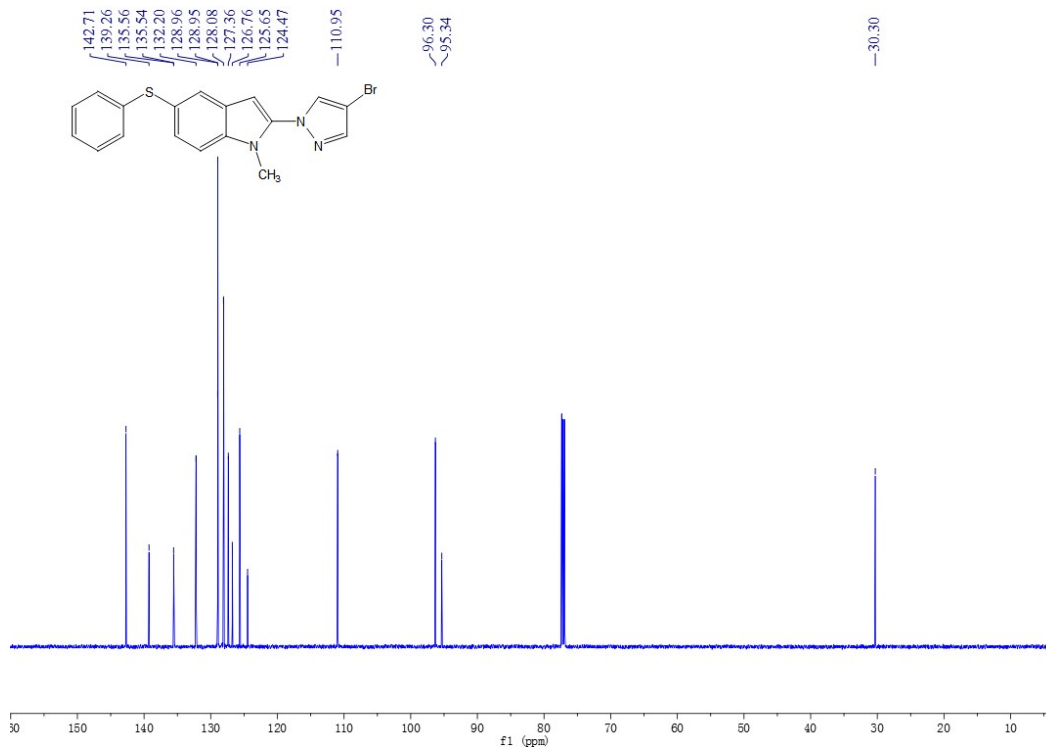



**(45)  $^1\text{H-NMR}$  (600 MHz,  $\text{CDCl}_3$ ) spectrum of 22**

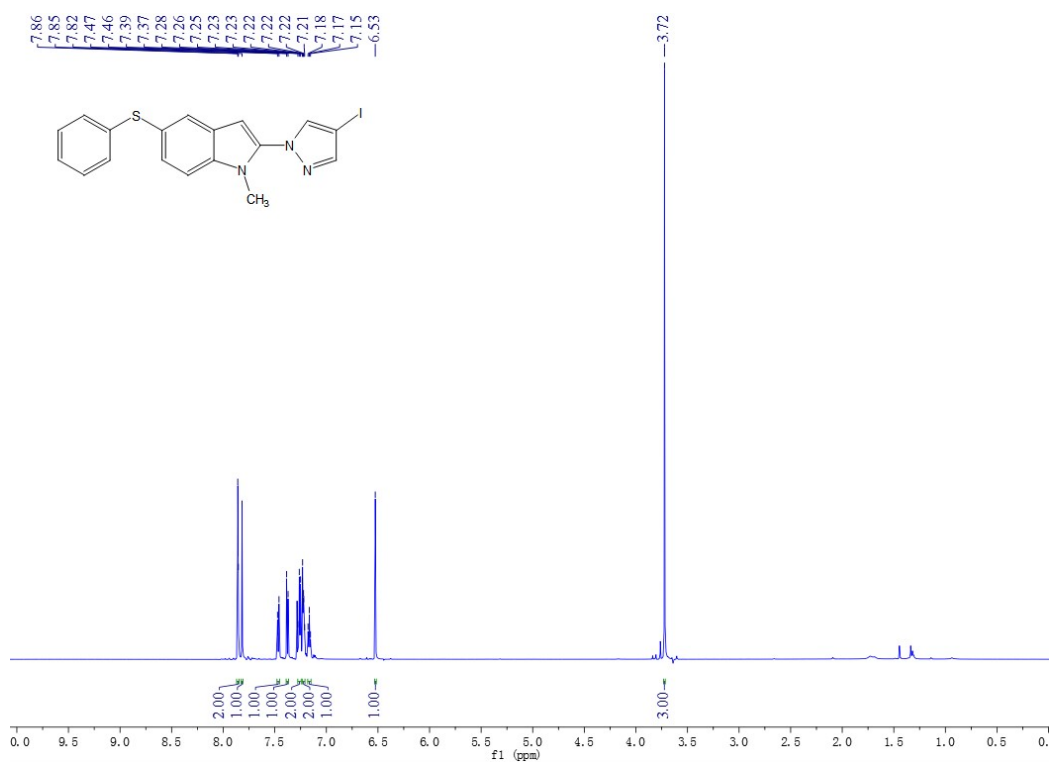

**(46)  $^{13}\text{C-NMR}$  (151 MHz,  $\text{CDCl}_3$ ) spectrum of 22**

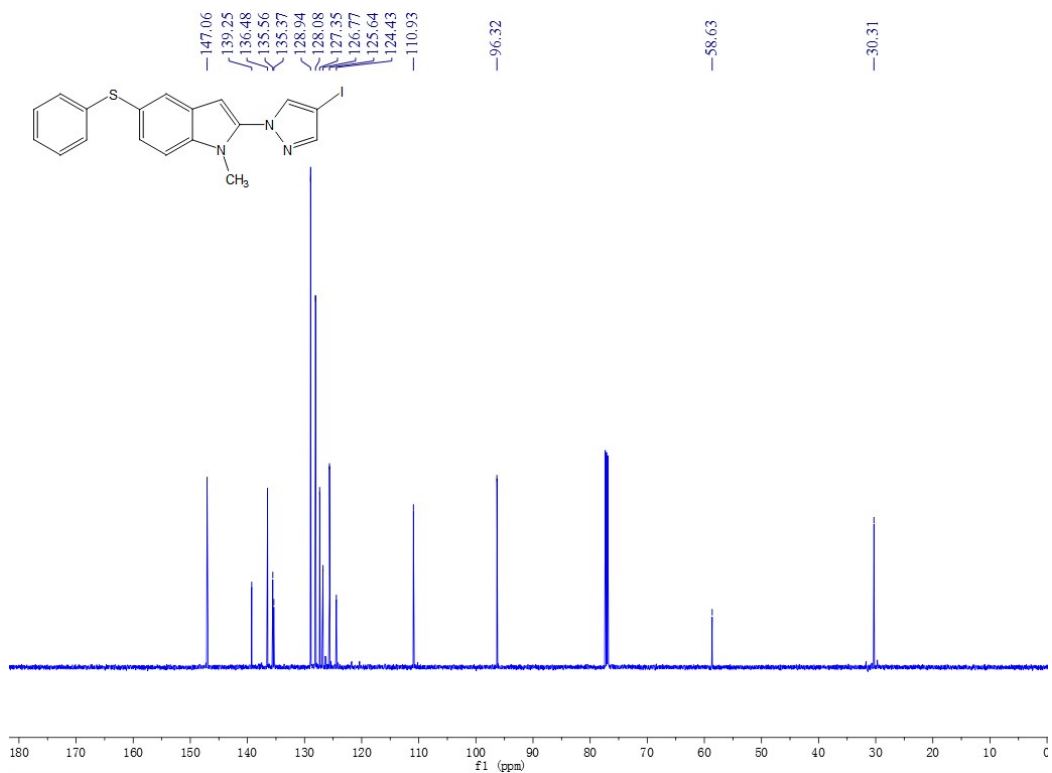

**(47)  $^1\text{H-NMR}$  (600 MHz,  $\text{CDCl}_3$ ) spectrum of 23**

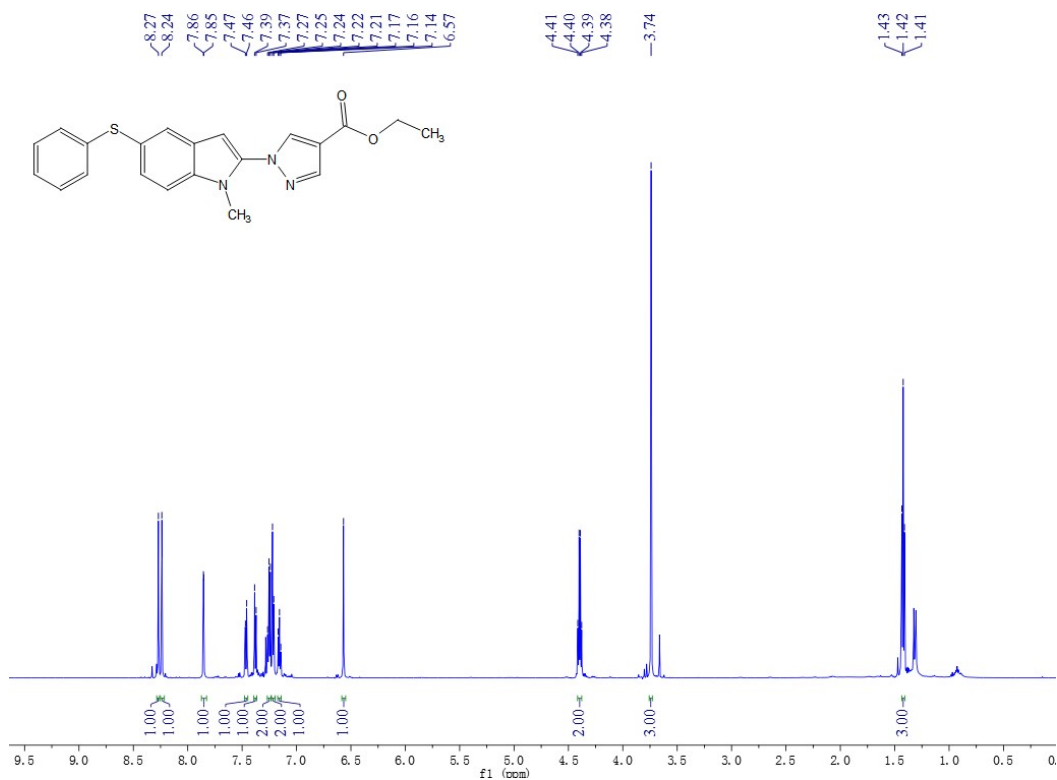

**(48)  $^{13}\text{C-NMR}$  (151 MHz,  $\text{CDCl}_3$ ) spectrum of 23**

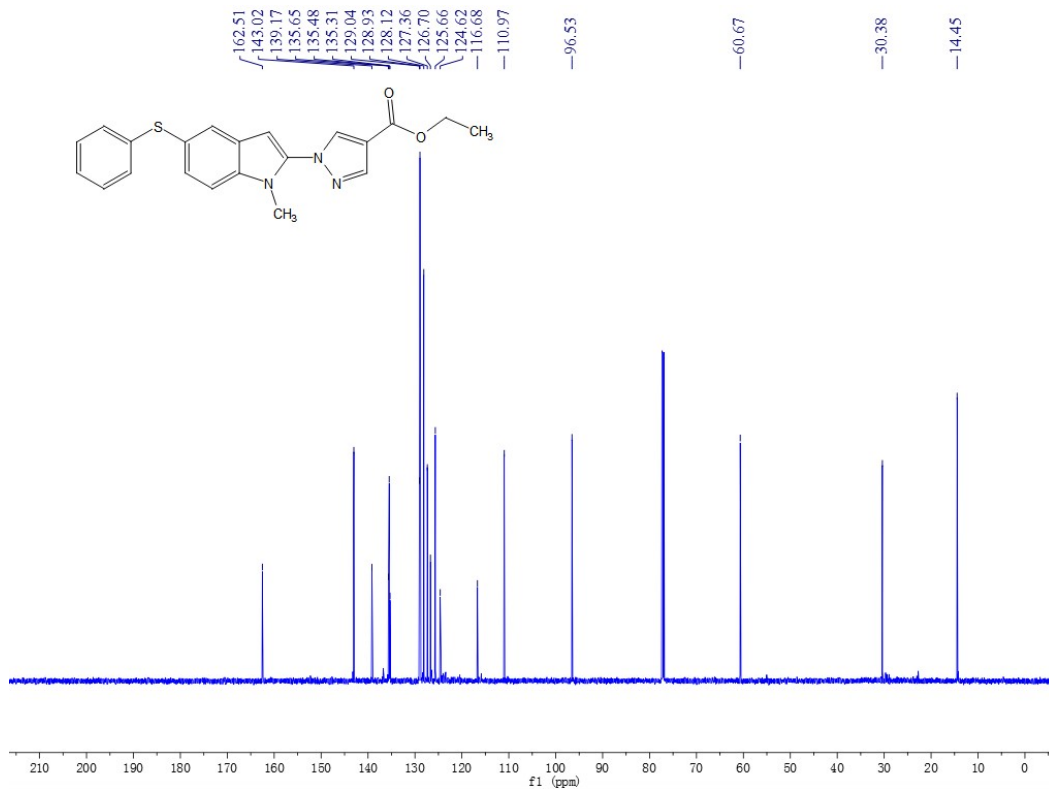

**(49)  $^1\text{H-NMR}$  (600 MHz,  $\text{CDCl}_3$ ) spectrum of 24**

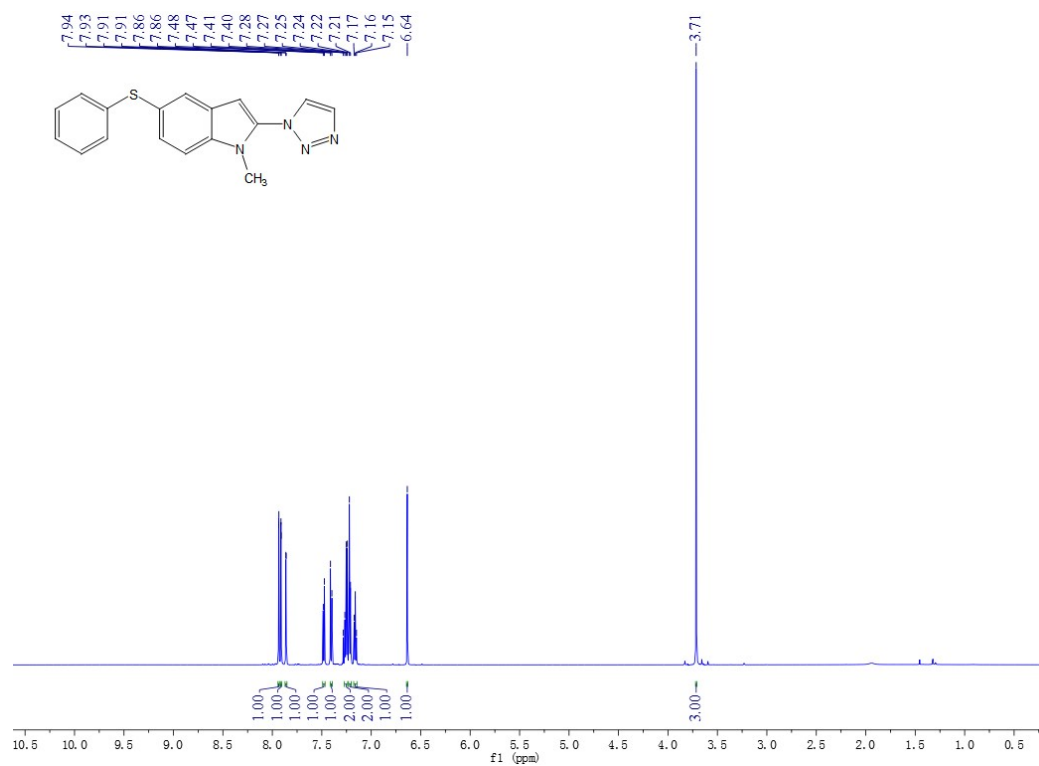

**(50)  $^{13}\text{C-NMR}$  (151 MHz,  $\text{CDCl}_3$ ) spectrum of 24**

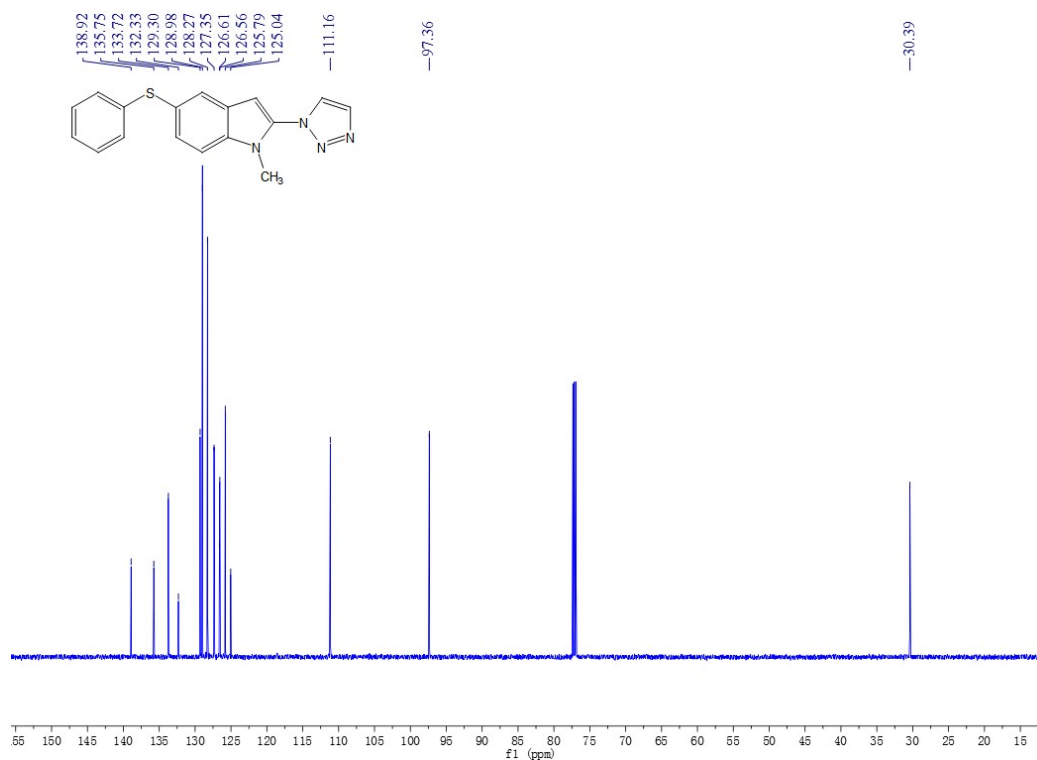

**(51)  $^1\text{H-NMR}$  (600 MHz,  $\text{CDCl}_3$ ) spectrum of 25**

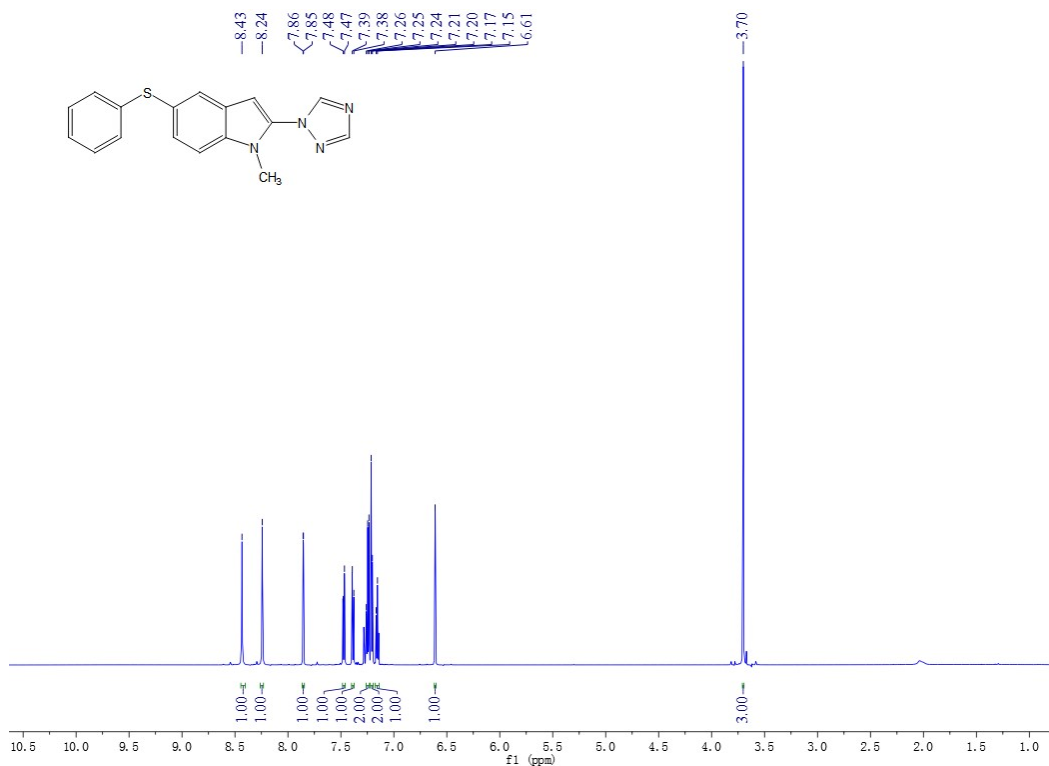

**(52)  $^{13}\text{C-NMR}$  (151 MHz,  $\text{CDCl}_3$ ) spectrum of 25**

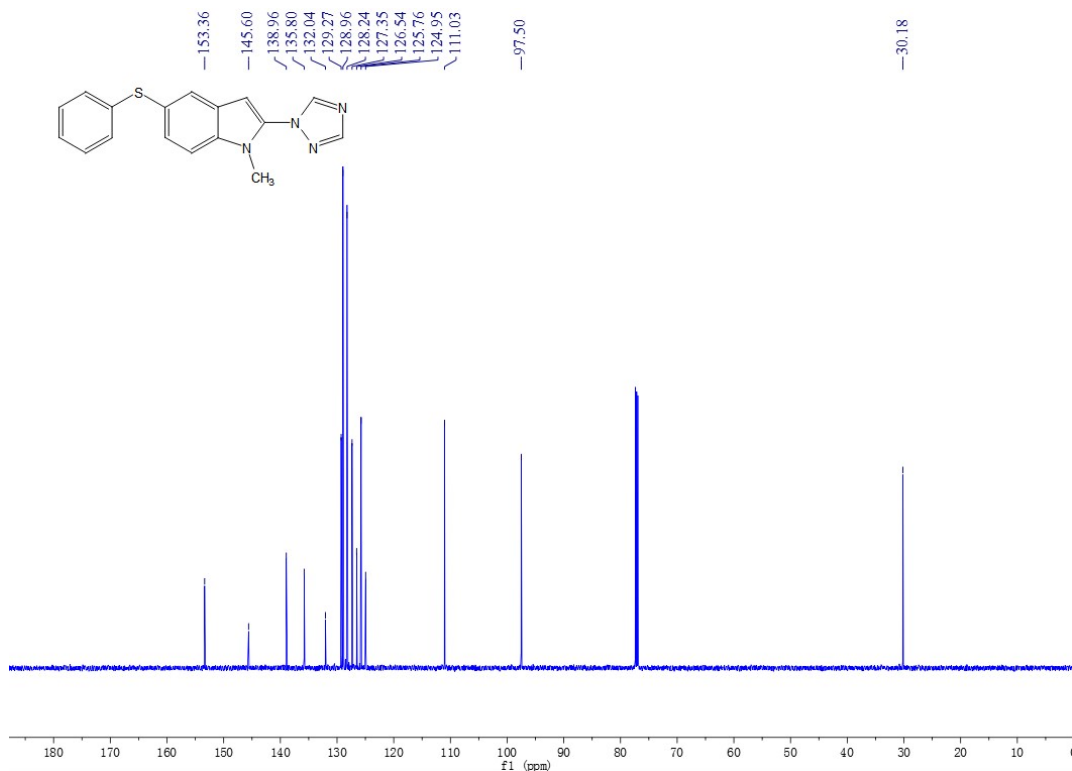

**(53)  $^1\text{H-NMR}$  (600 MHz,  $\text{CDCl}_3$ ) spectrum of 26**

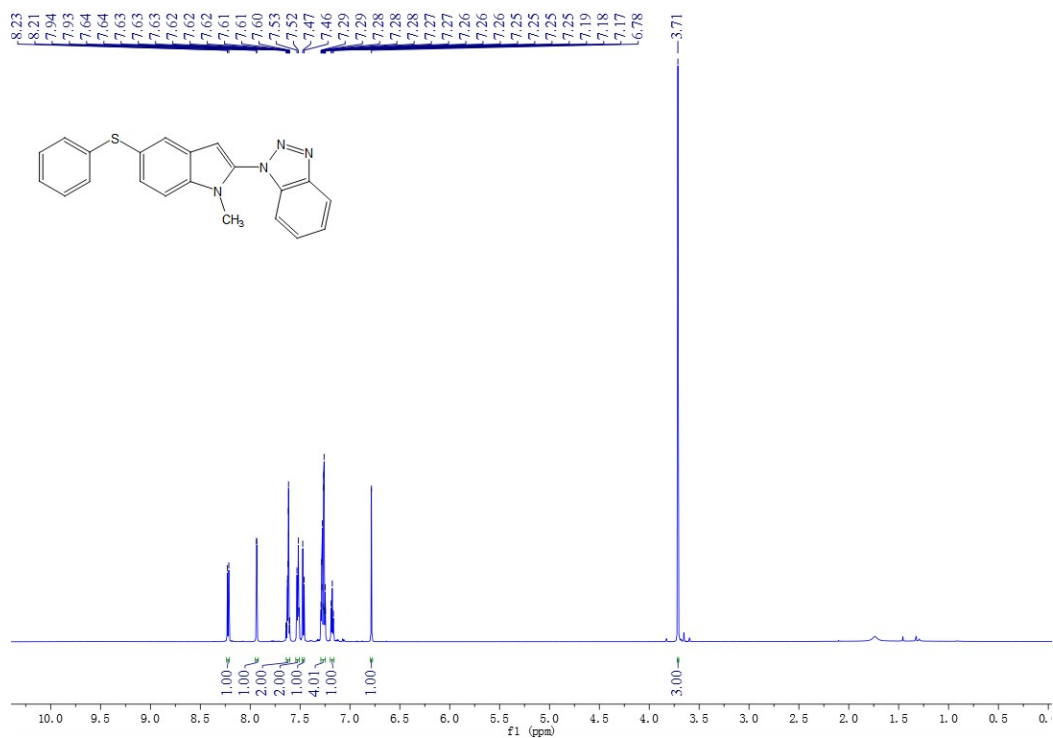

**(54)  $^{13}\text{C-NMR}$  (151 MHz,  $\text{CDCl}_3$ ) spectrum of 26**

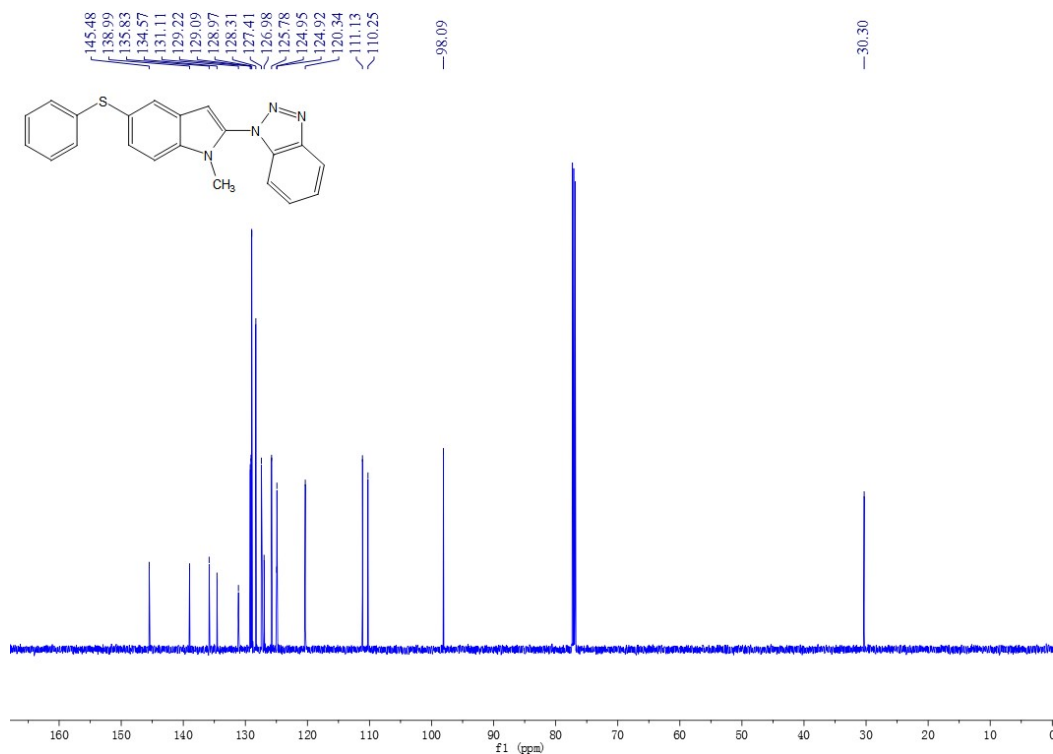

**(55)  $^1\text{H-NMR}$  (600 MHz,  $\text{CDCl}_3$ ) spectrum of 27**

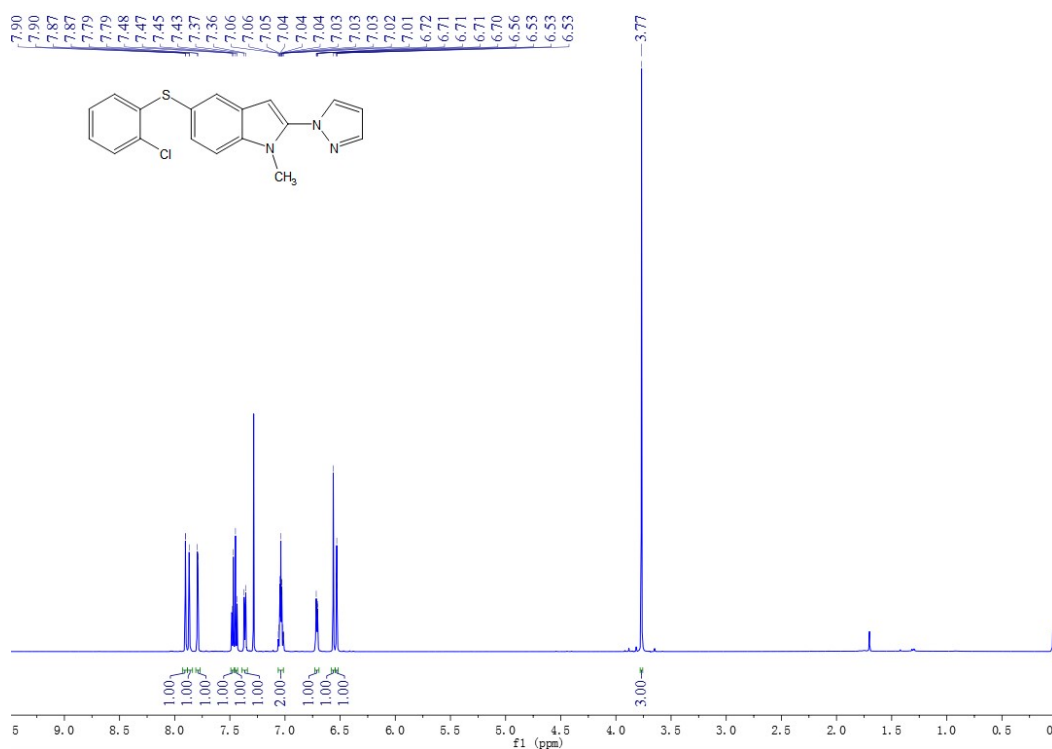

**(56)  $^{13}\text{C-NMR}$  (151 MHz,  $\text{CDCl}_3$ ) spectrum of 27**

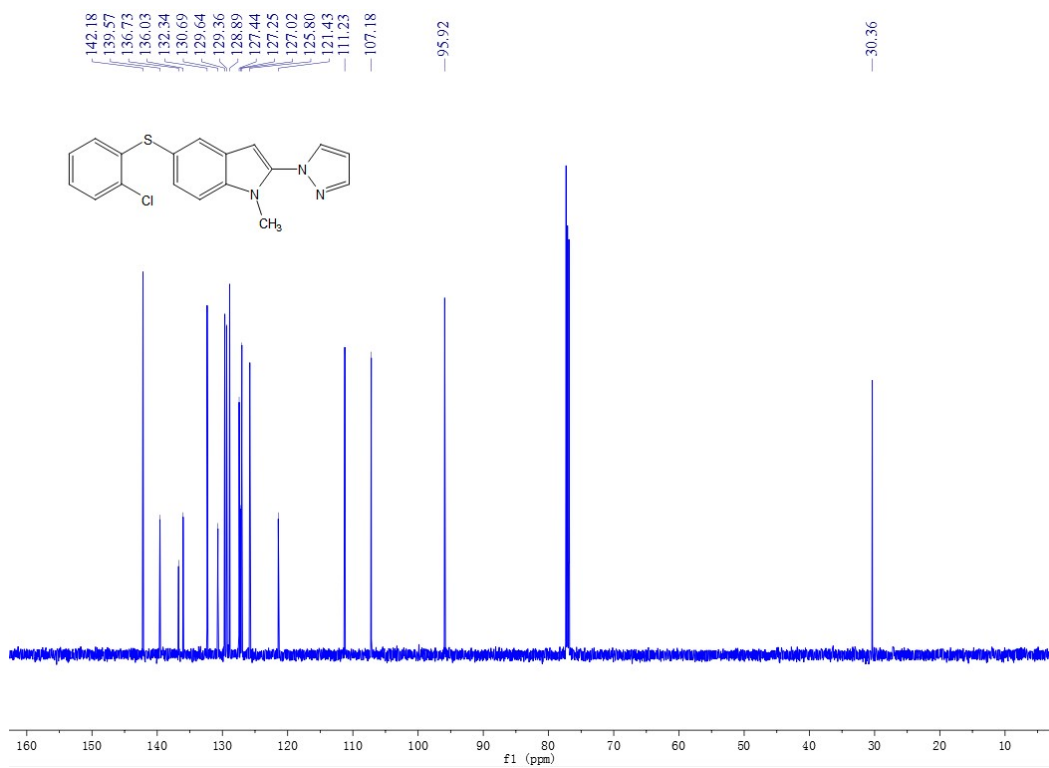

**(57)  $^1\text{H-NMR}$  (600 MHz,  $\text{CDCl}_3$ ) spectrum of 28**

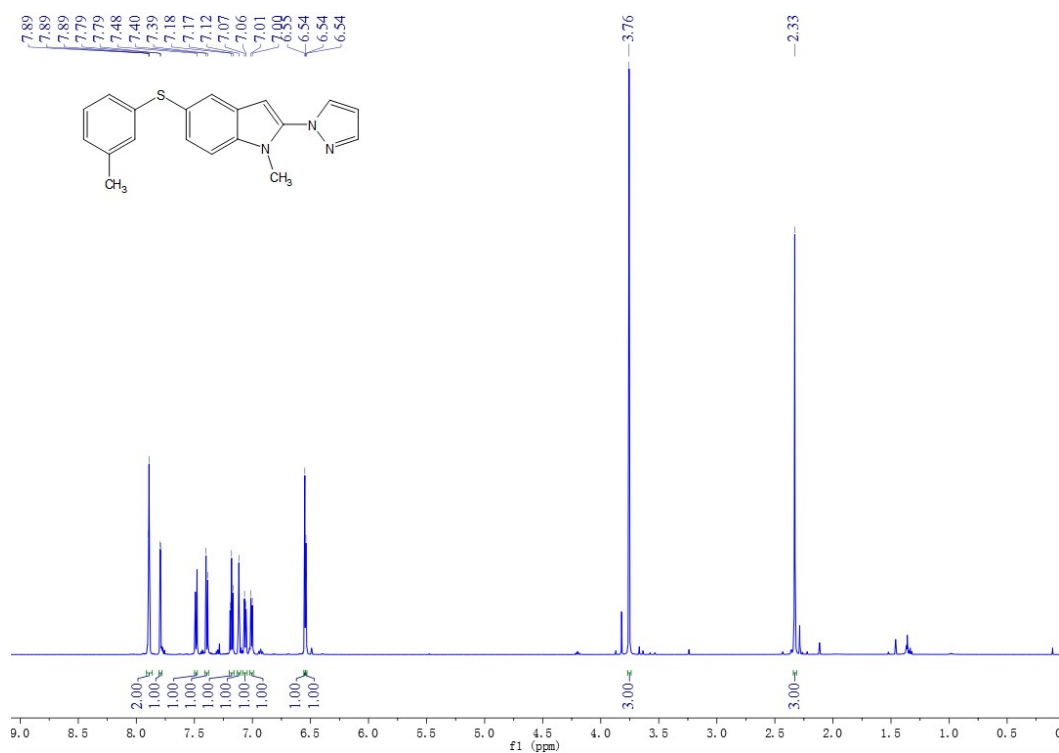

**(58)  $^{13}\text{C-NMR}$  (151 MHz,  $\text{CDCl}_3$ ) spectrum of 28**

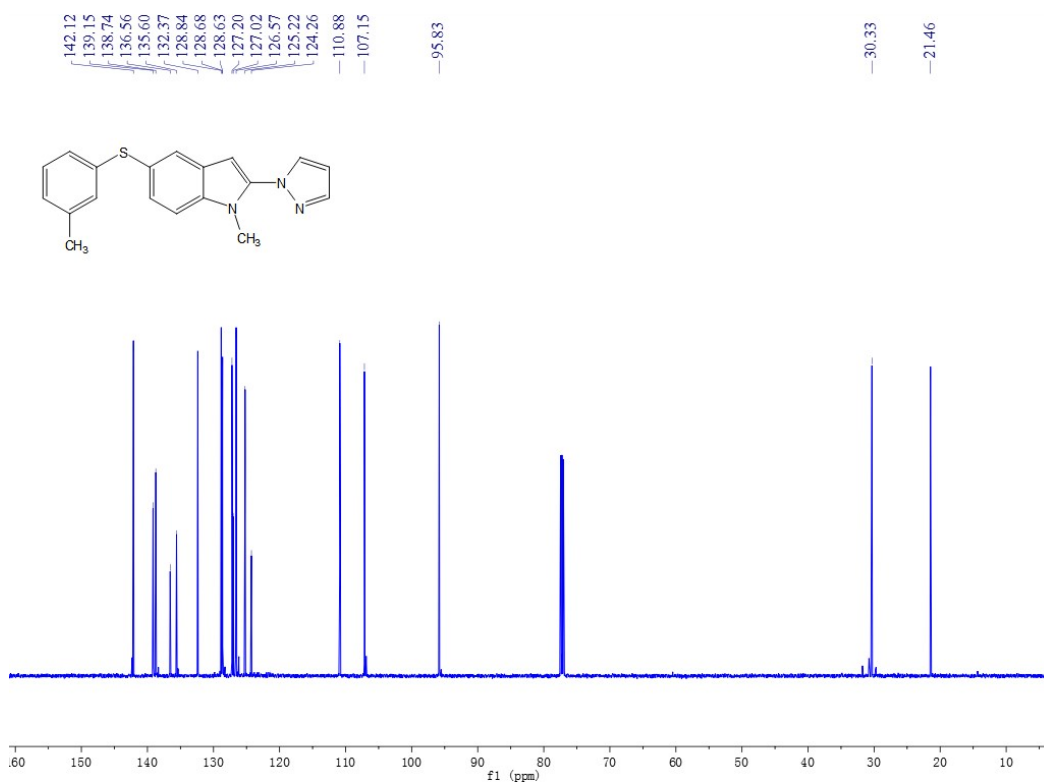

**(59)  $^1\text{H-NMR}$  (600 MHz,  $\text{CDCl}_3$ ) spectrum of 29**

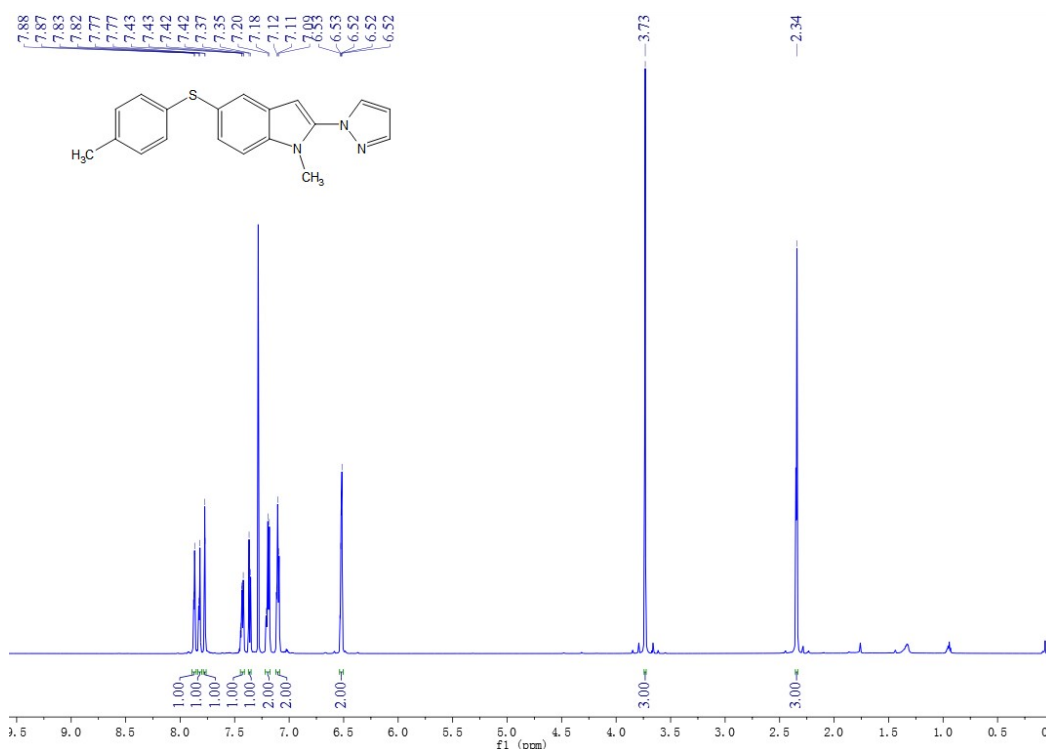

**(60)  $^{13}\text{C-NMR}$  (151 MHz,  $\text{CDCl}_3$ ) spectrum of 29**

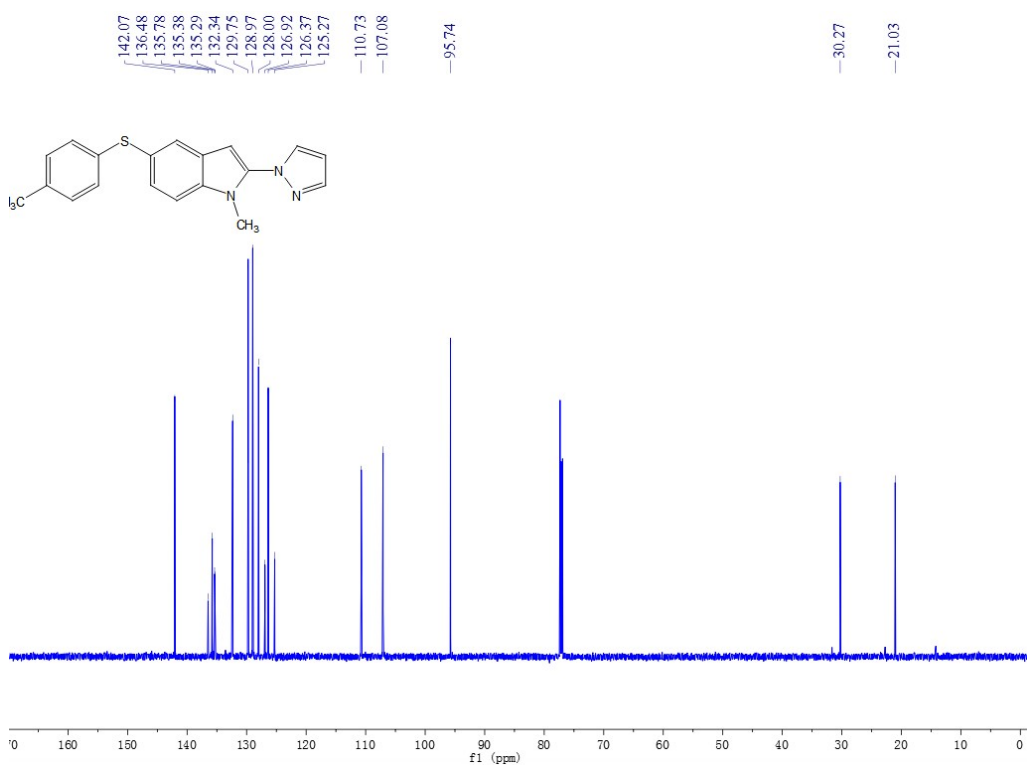



**(61)  $^1\text{H-NMR}$  (600 MHz,  $\text{CDCl}_3$ ) spectrum of 30**

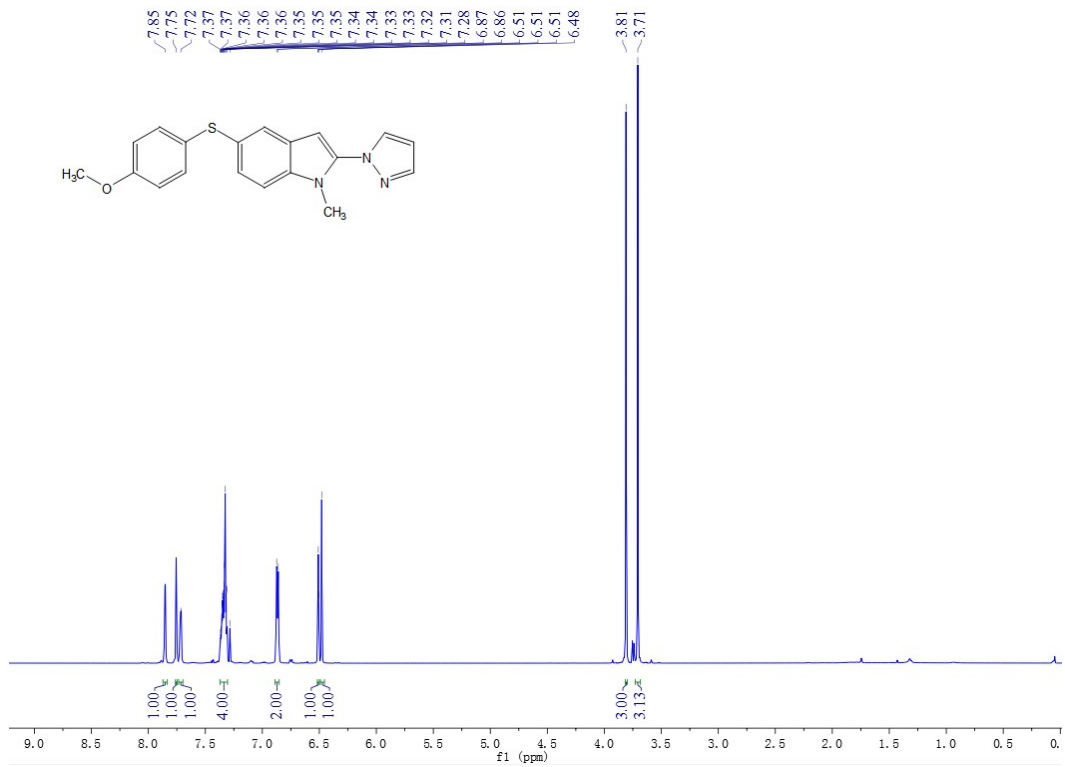

**(62)  $^{13}\text{C-NMR}$  (151 MHz,  $\text{CDCl}_3$ ) spectrum of 30**

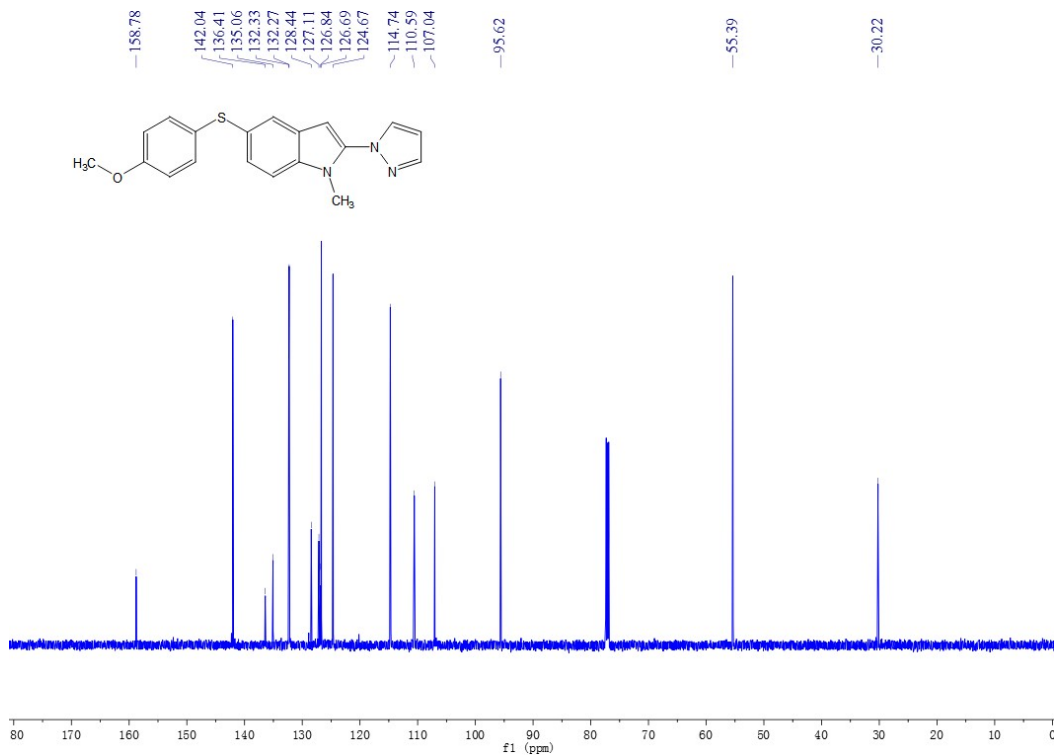

**(63)  $^1\text{H-NMR}$  (600 MHz,  $\text{CDCl}_3$ ) spectrum of 31**

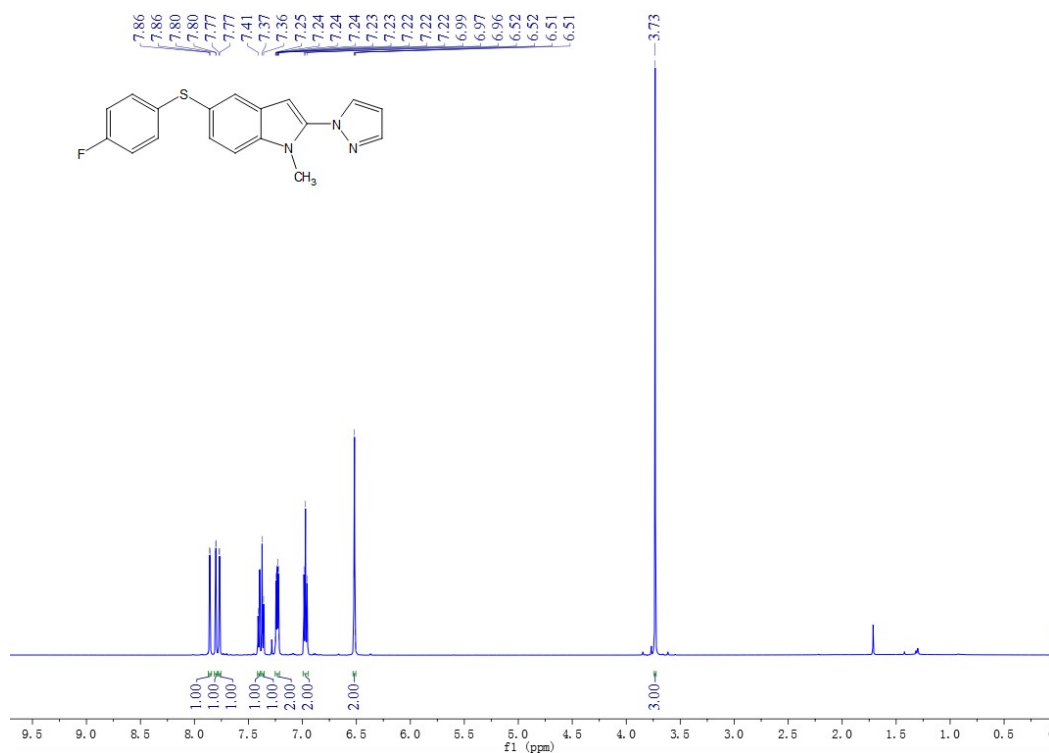

**(64)  $^{13}\text{C-NMR}$  (151 MHz,  $\text{CDCl}_3$ ) spectrum of 31**

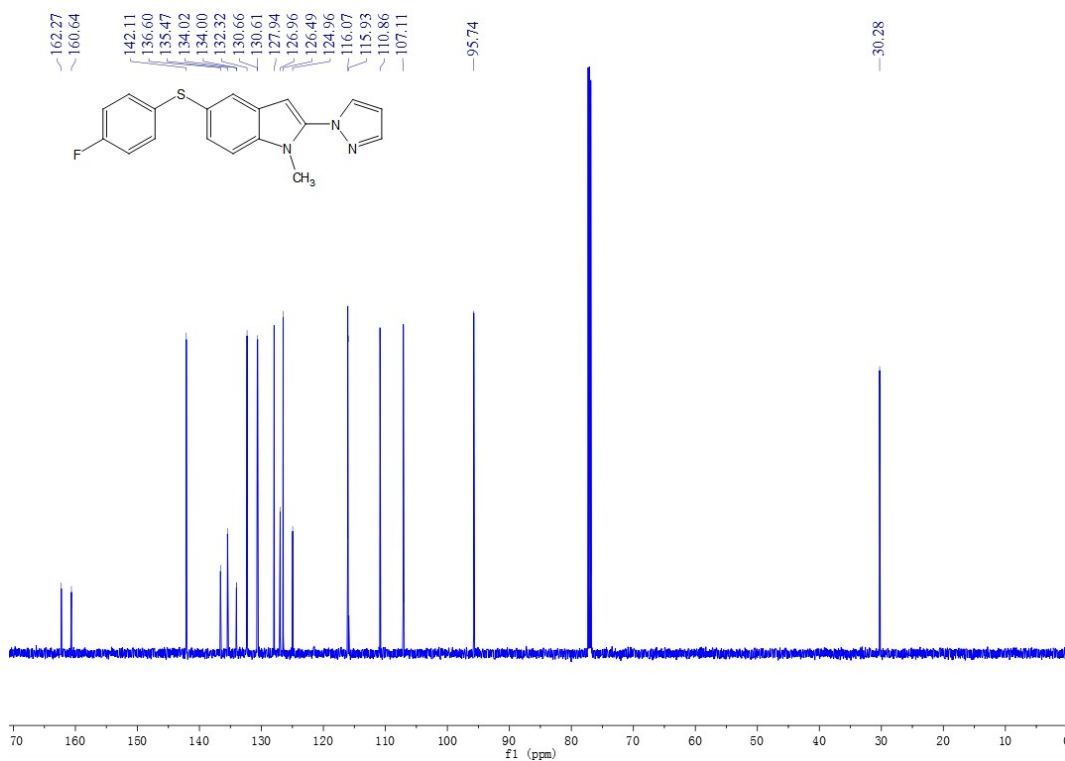

**(65)  $^{19}\text{F}$ -NMR (565 MHz,  $\text{CDCl}_3$ ) spectrum of 31**

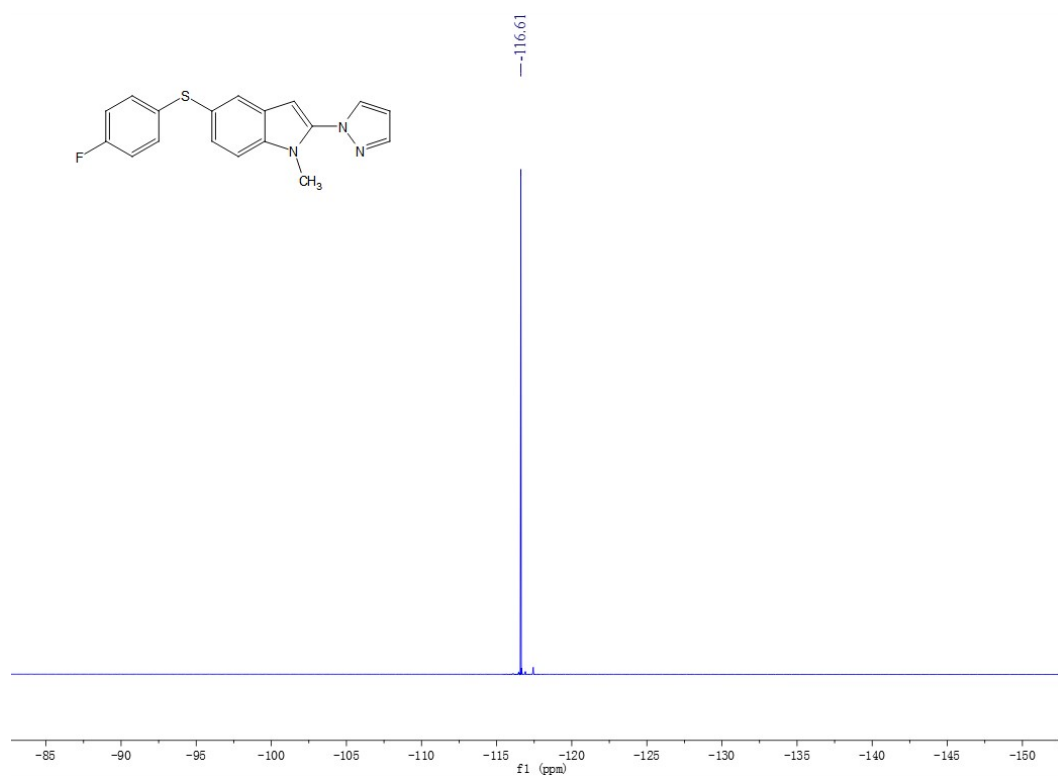

**(66)  $^1\text{H}$ -NMR (600 MHz,  $\text{CDCl}_3$ ) spectrum of 32**

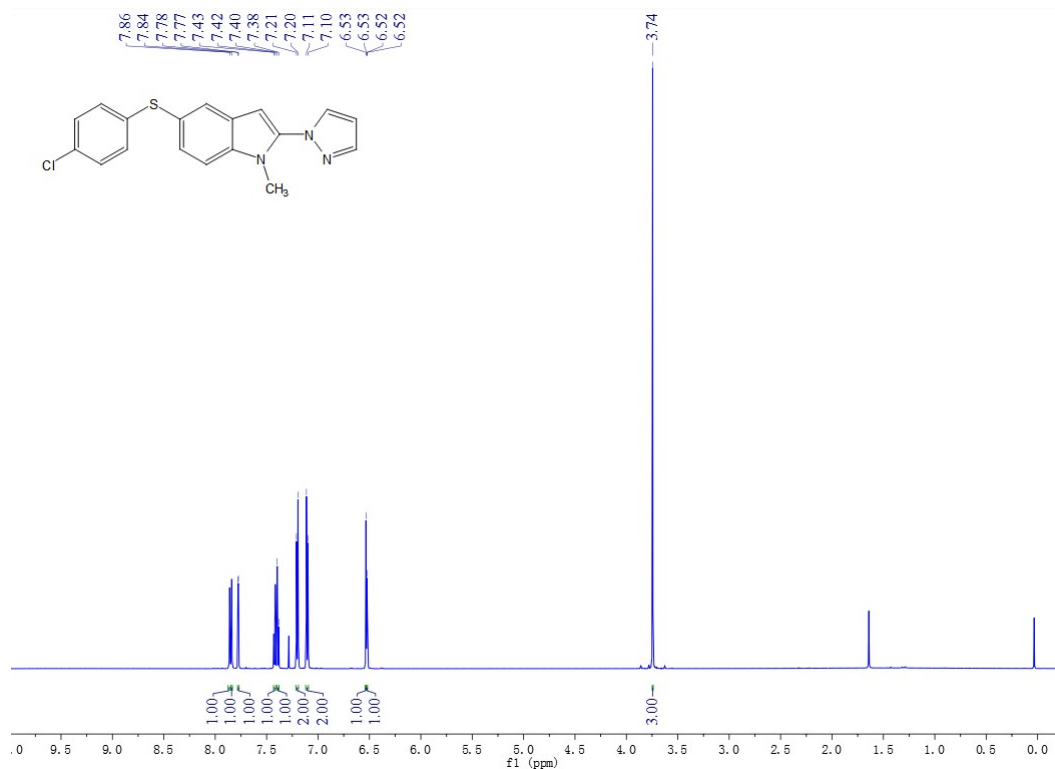

(67)  $^{13}\text{C}$ -NMR (151 MHz,  $\text{CDCl}_3$ ) spectrum of 32

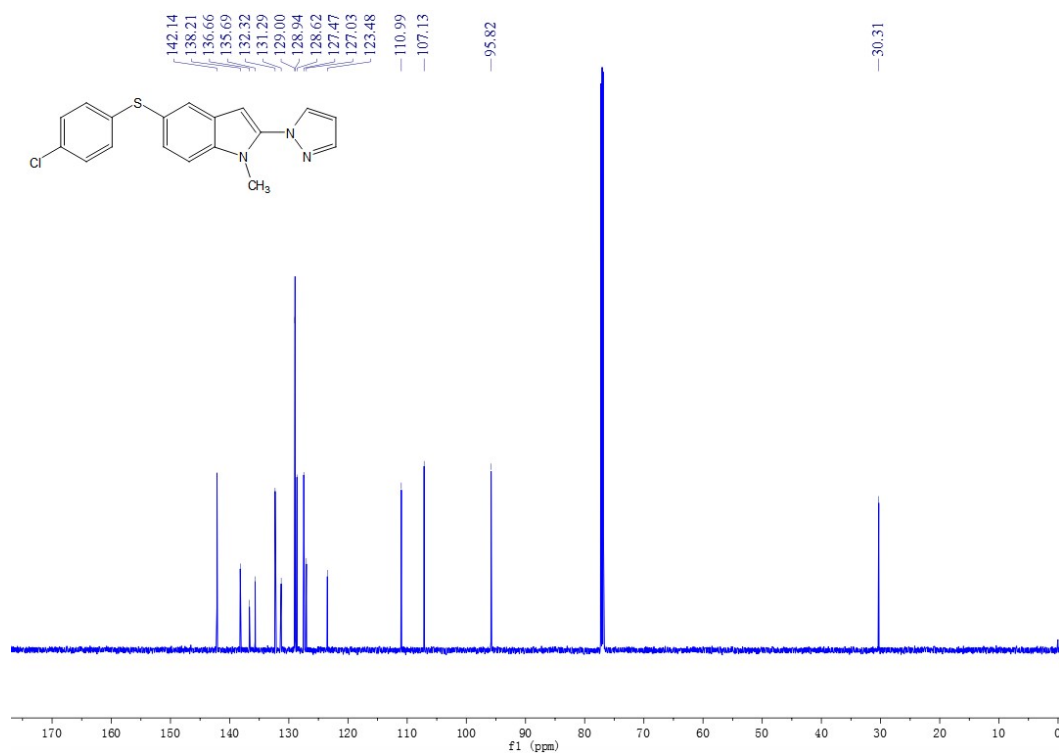

(68)  $^1\text{H}$ -NMR (600 MHz,  $\text{CDCl}_3$ ) spectrum of 33

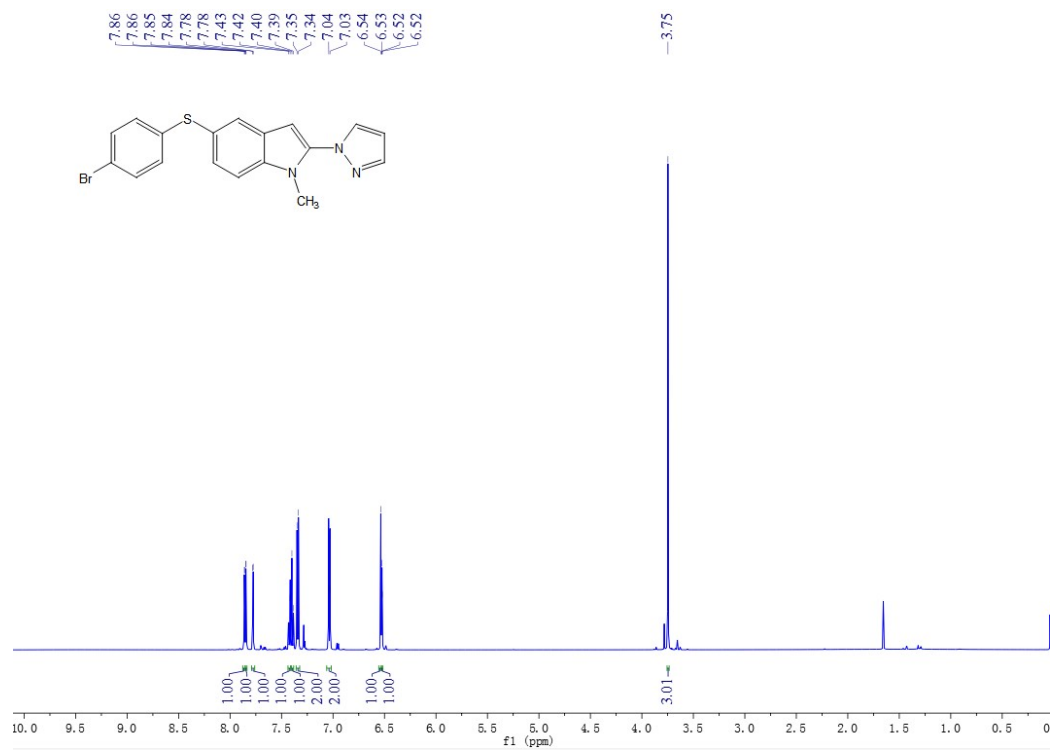

**(69)  $^{13}\text{C}$ -NMR (151 MHz,  $\text{CDCl}_3$ ) spectrum of 33**

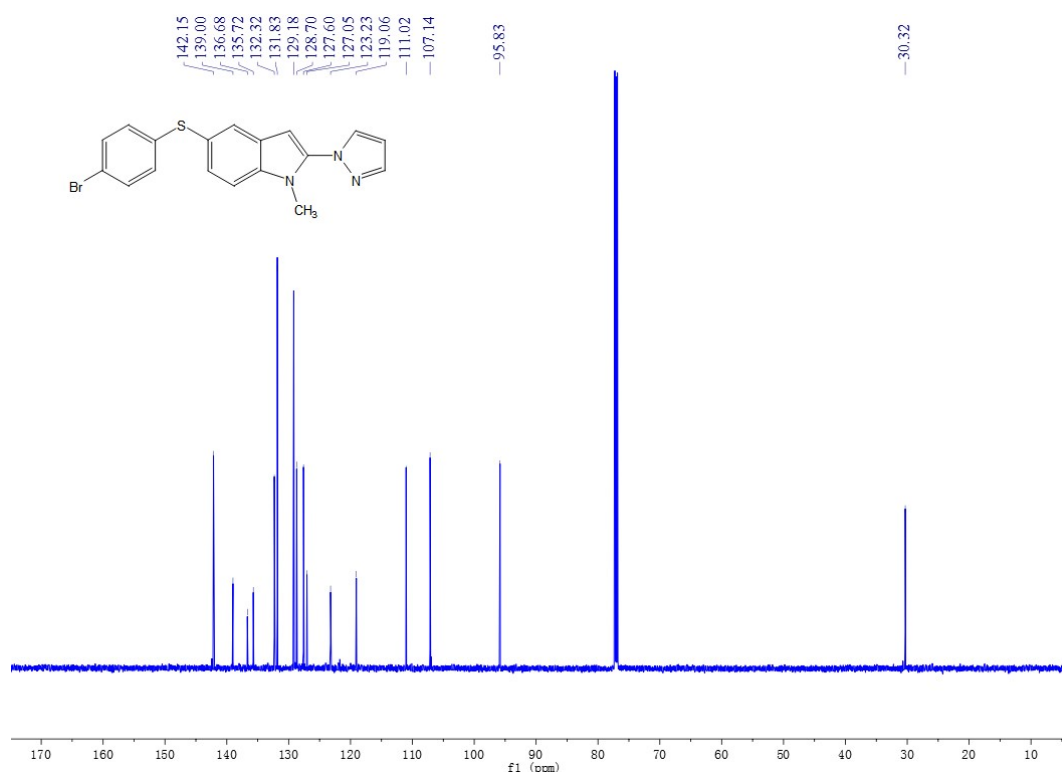

**(70)  $^1\text{H}$ -NMR (600 MHz,  $\text{CDCl}_3$ ) spectrum of 34**

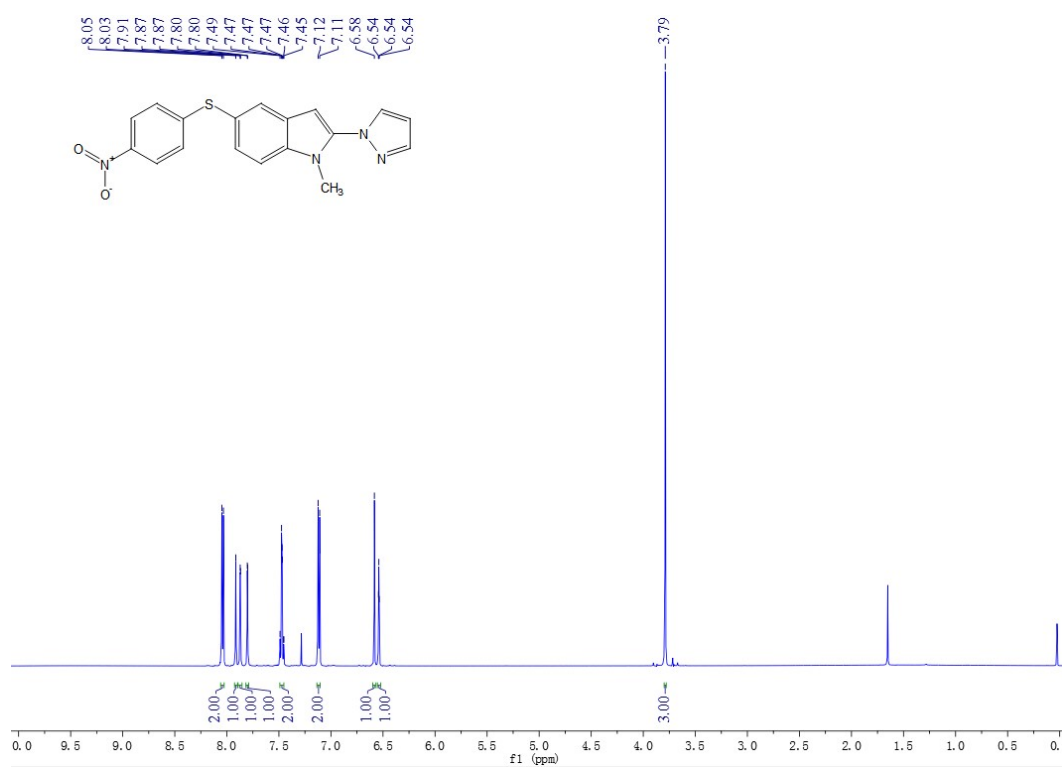

(71)  $^{13}\text{C}$ -NMR (151 MHz,  $\text{CDCl}_3$ ) spectrum of 34

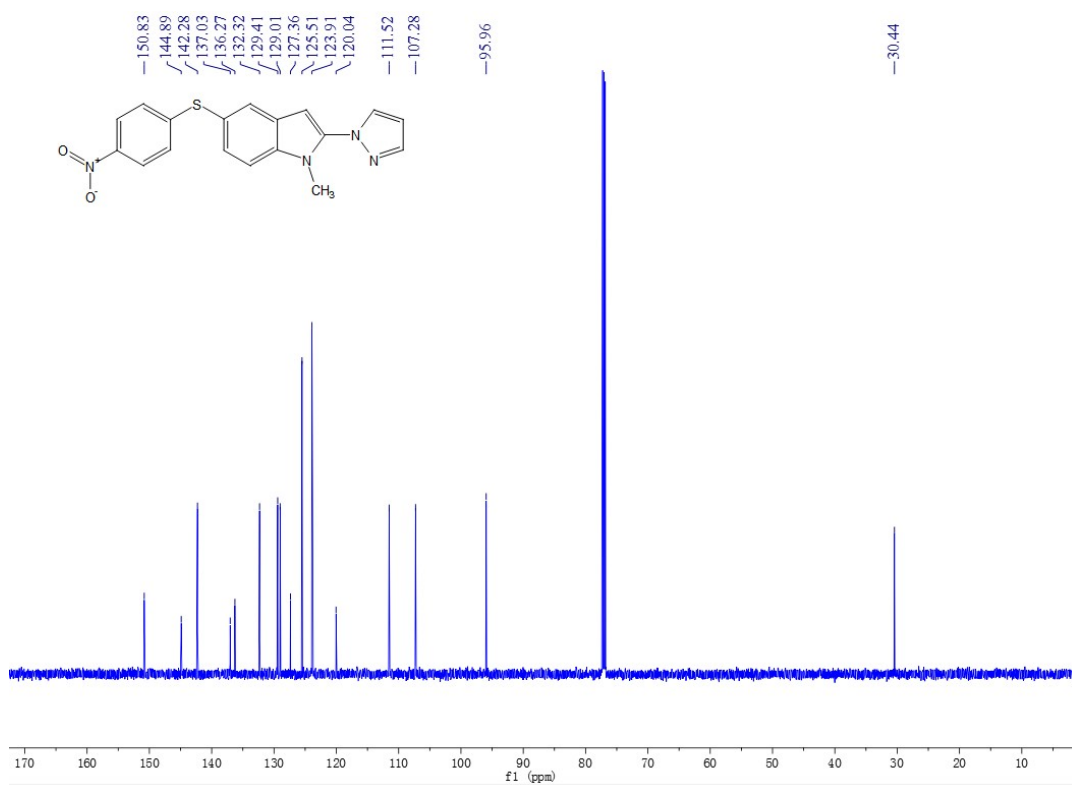

(72)  $^1\text{H}$ -NMR (600 MHz,  $\text{CDCl}_3$ ) spectrum of 35

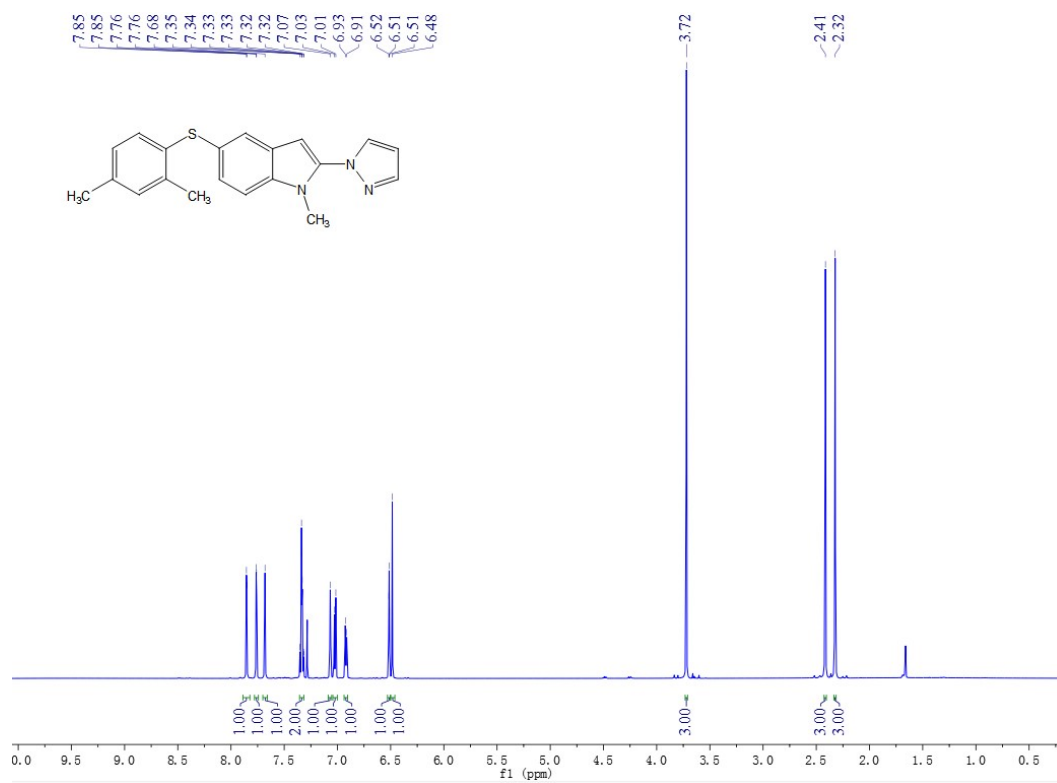

(73)  $^{13}\text{C}$ -NMR (151 MHz,  $\text{CDCl}_3$ ) spectrum of 35

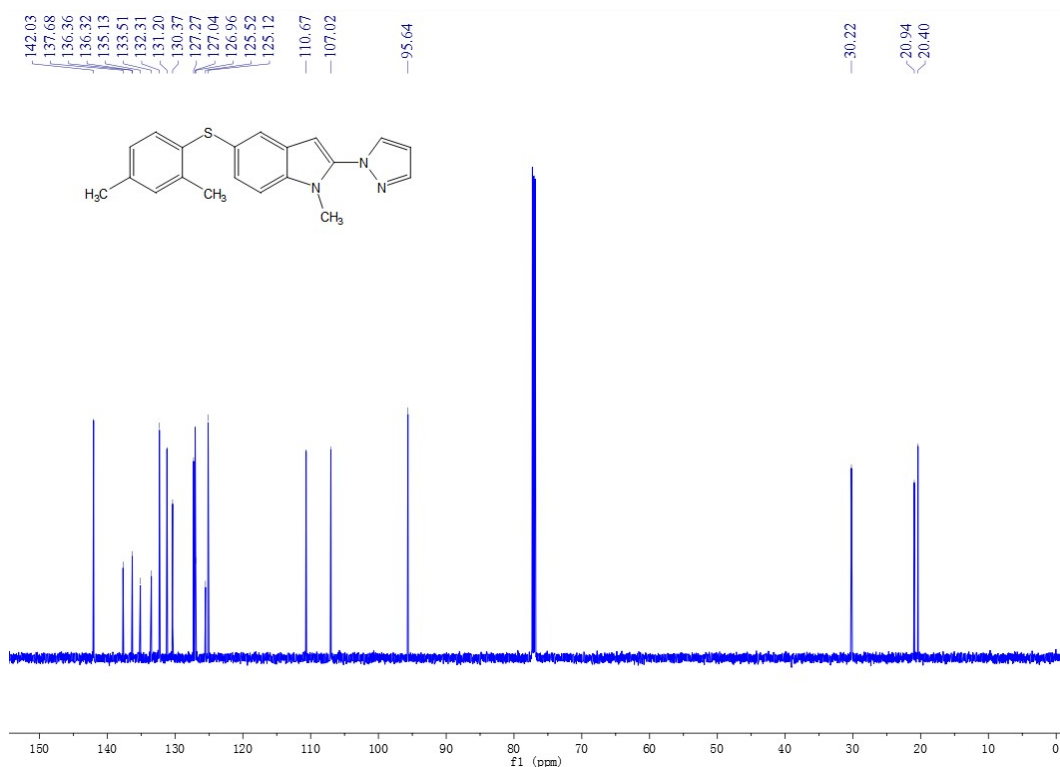

(74)  $^1\text{H}$ -NMR (600 MHz,  $\text{CDCl}_3$ ) spectrum of 36

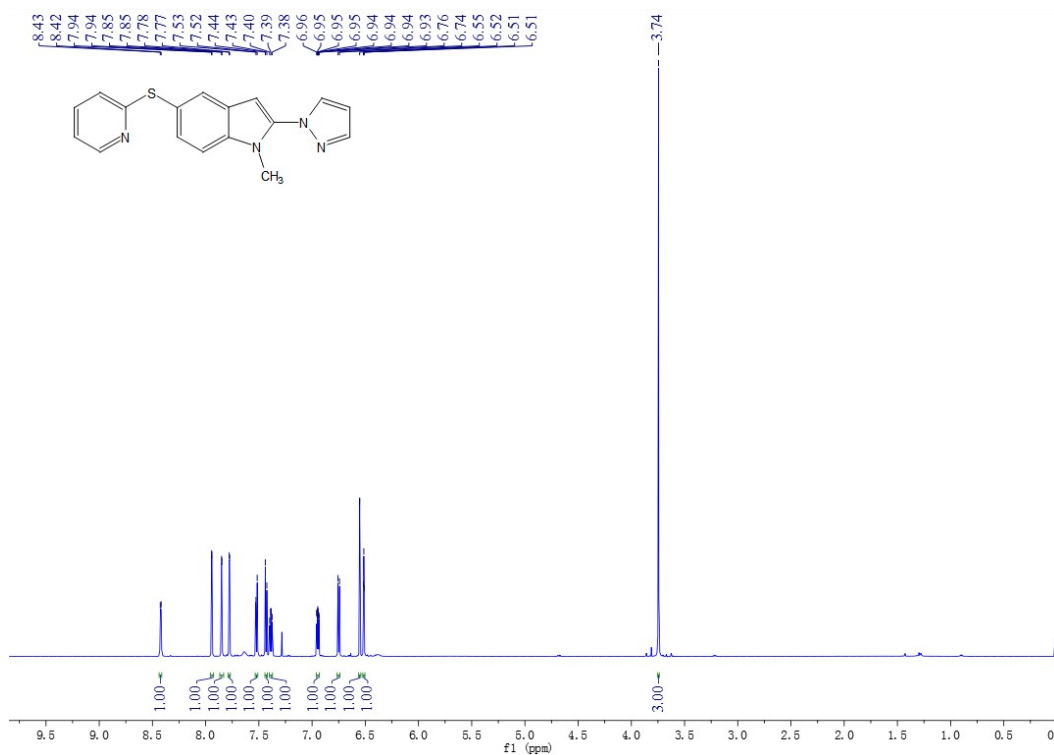

(75)  $^{13}\text{C}$ -NMR (151 MHz,  $\text{CDCl}_3$ ) spectrum of 36

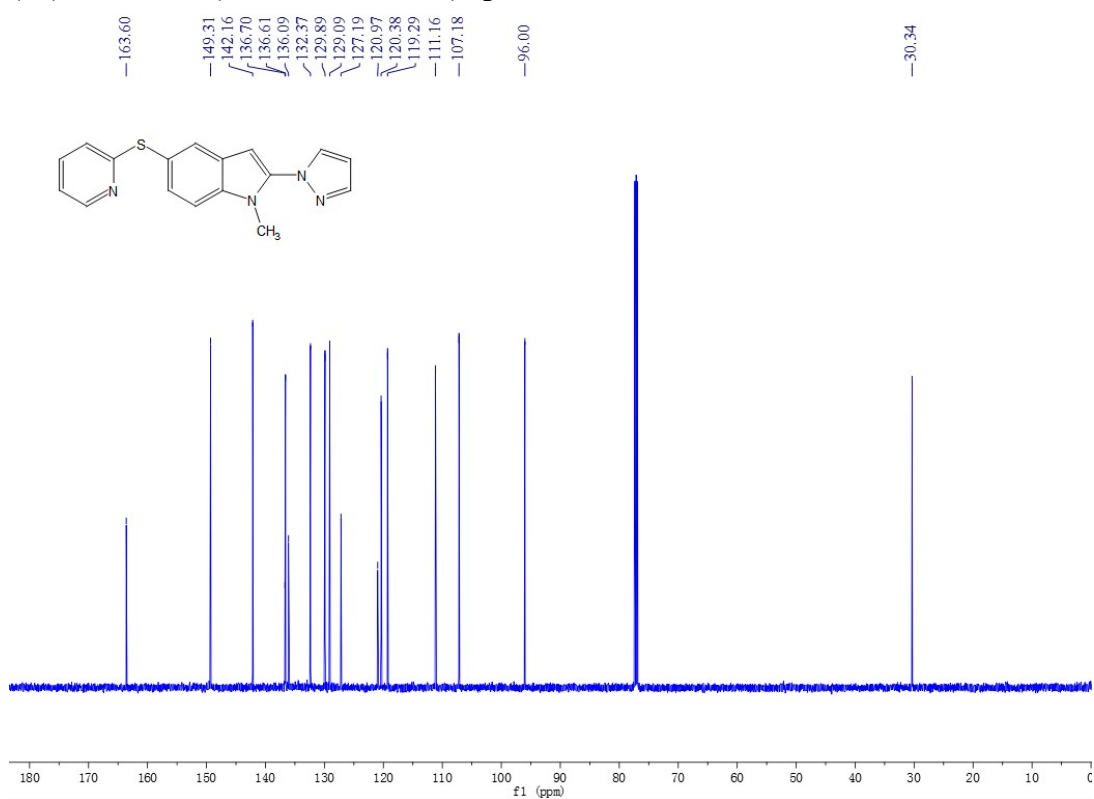

(76)  $^1\text{H}$ -NMR (600 MHz,  $\text{CDCl}_3$ ) spectrum of 37

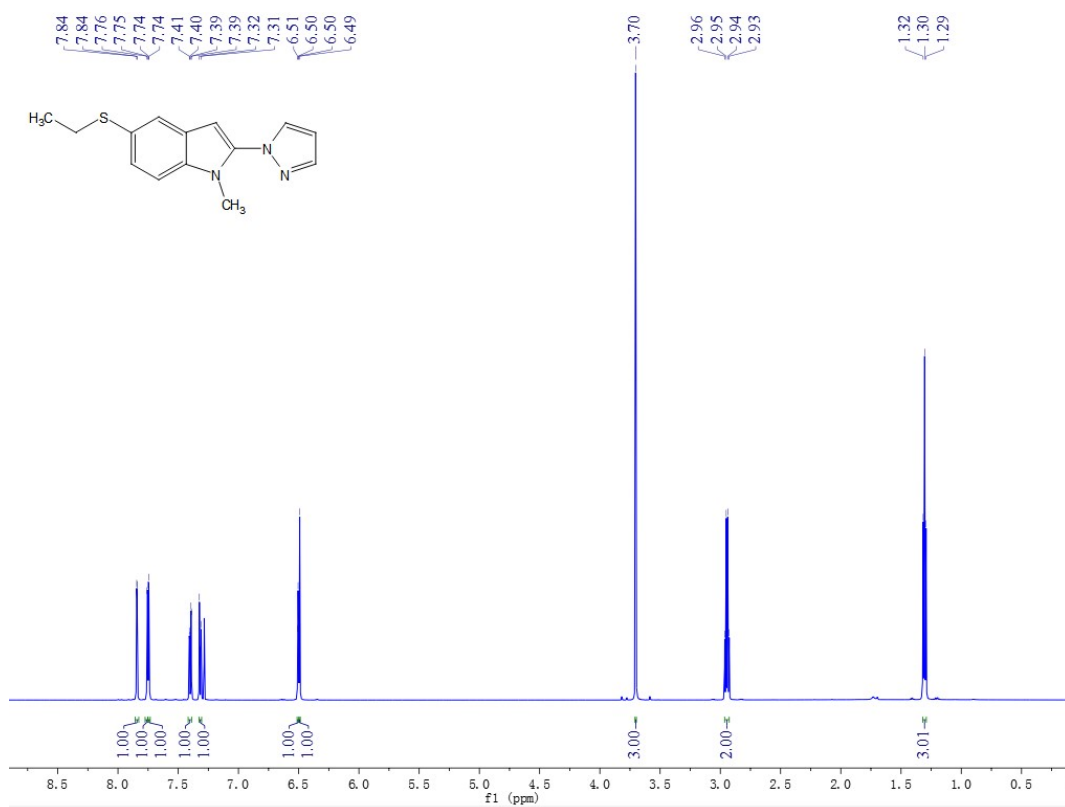



(77)  $^{13}\text{C}$ -NMR (151 MHz,  $\text{CDCl}_3$ ) spectrum of 37

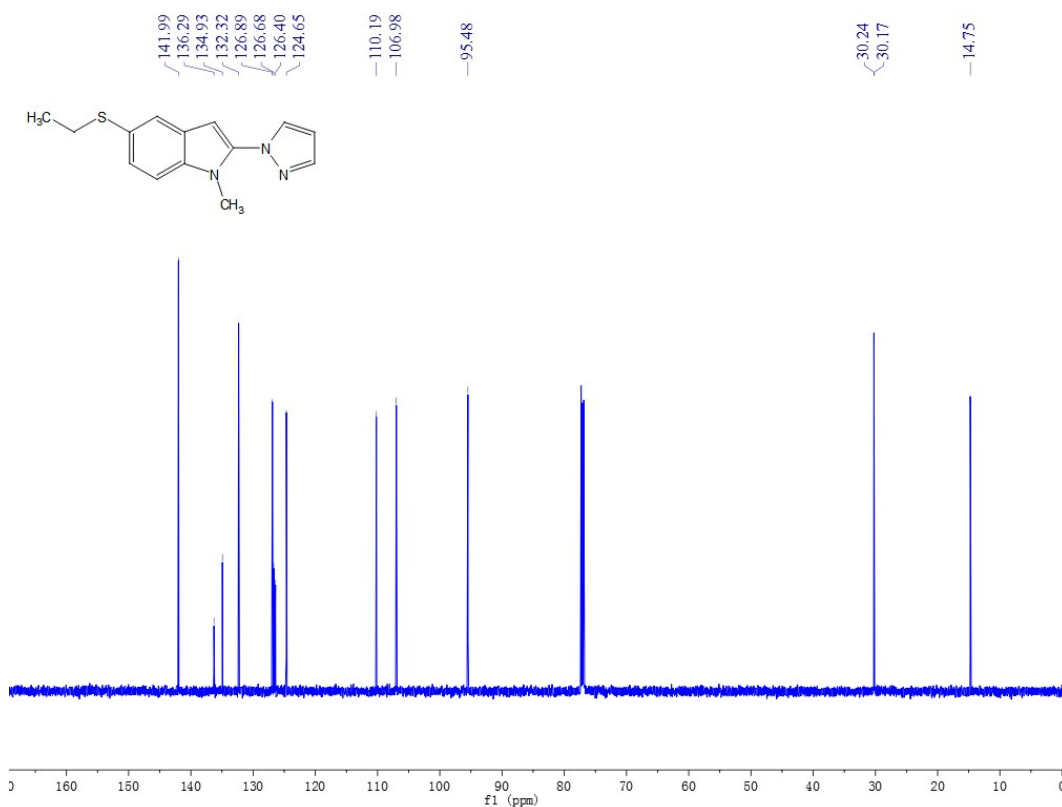

(78)  $^1\text{H}$ -NMR (600 MHz,  $\text{CDCl}_3$ ) spectrum of 38

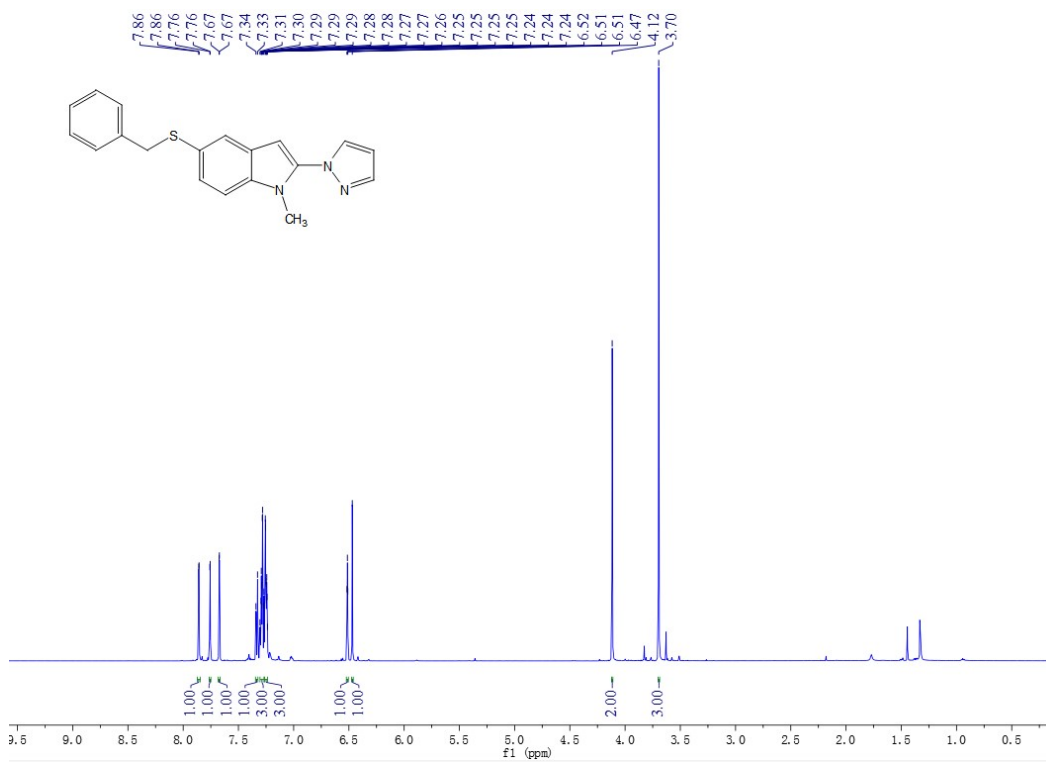

**(79)  $^{13}\text{C}$ -NMR (151 MHz,  $\text{CDCl}_3$ ) spectrum of 38**

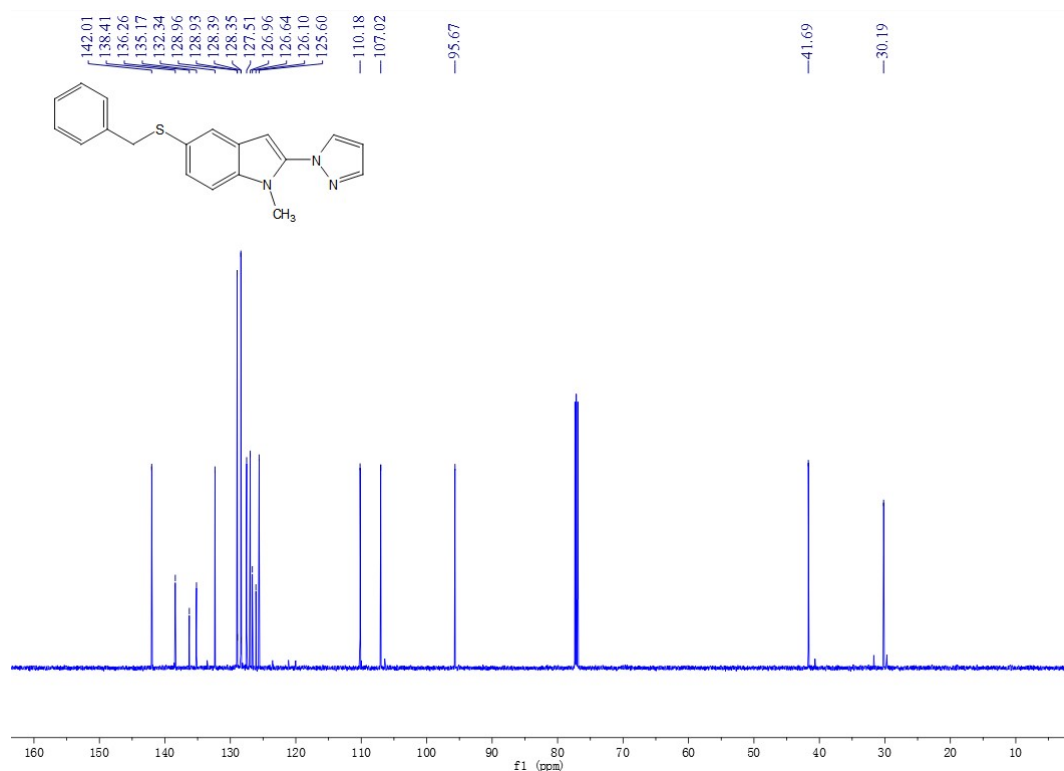

**(80)  $^1\text{H}$ -NMR (600 MHz,  $\text{CDCl}_3$ ) spectrum of 39**

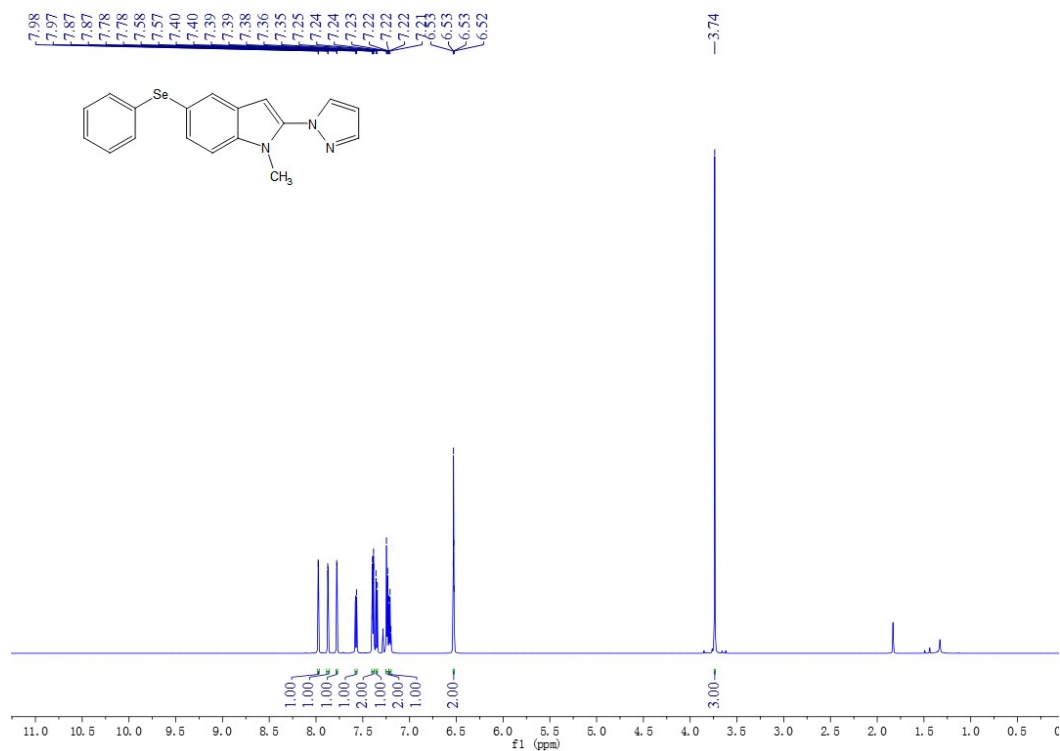

**(81)  $^{13}\text{C}$ -NMR (151 MHz,  $\text{CDCl}_3$ ) spectrum of 39**

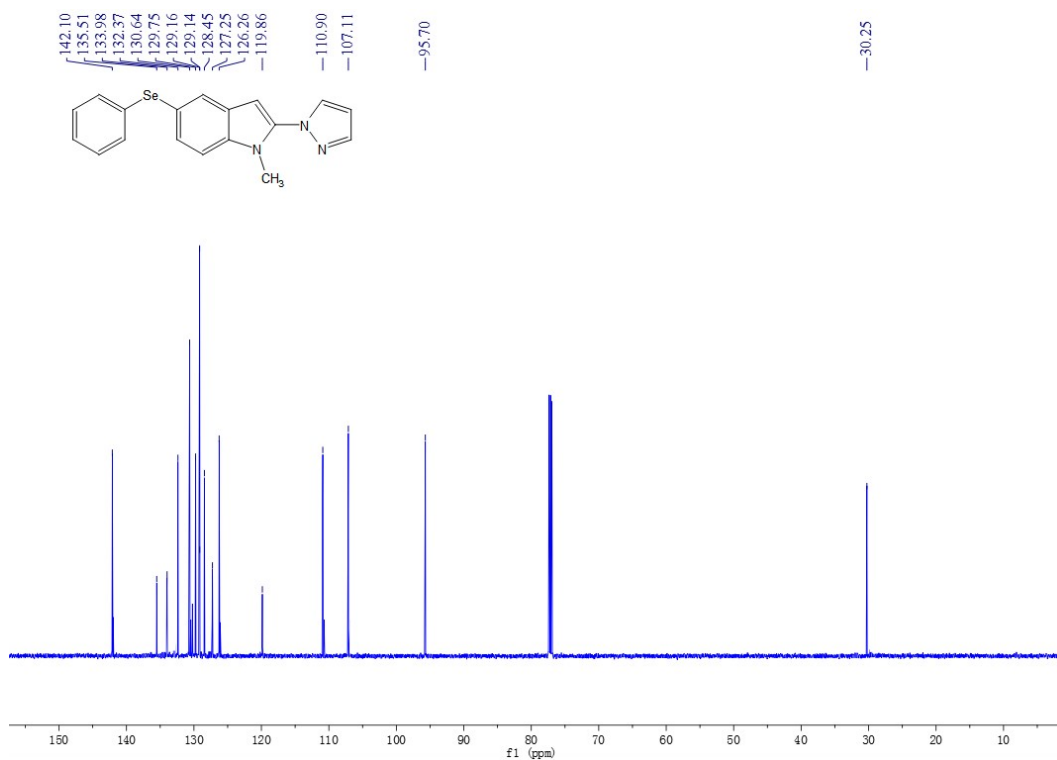

**(82)  $^1\text{H}$ -NMR (600 MHz,  $\text{CDCl}_3$ ) spectrum of 40**

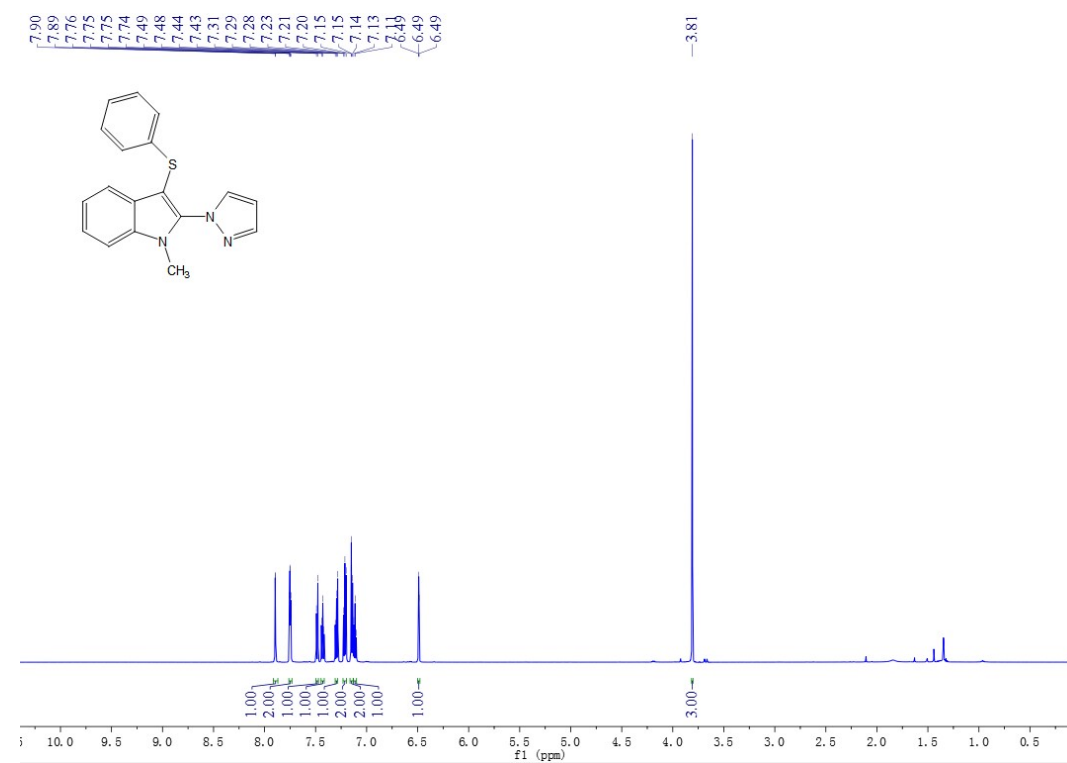

**(83)  $^{13}\text{C}$ -NMR (151 MHz,  $\text{CDCl}_3$ ) spectrum of 40**

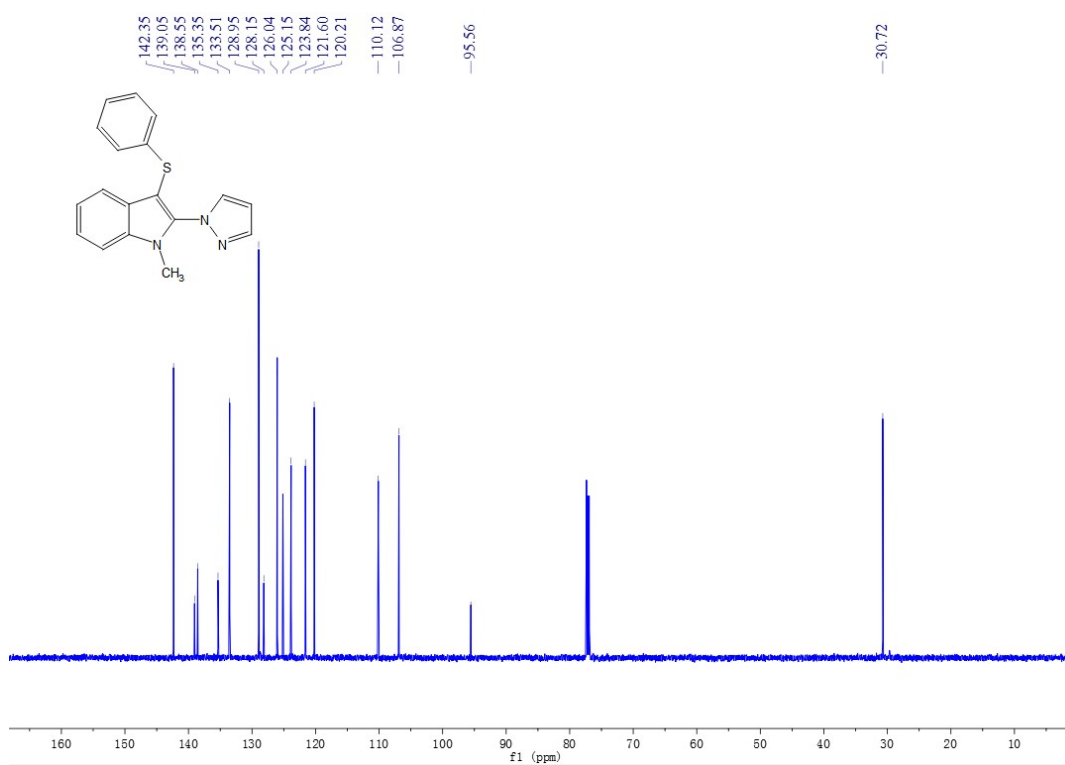

**(84)  $^1\text{H}$ -NMR (600 MHz,  $\text{CDCl}_3$ ) spectrum of 41**

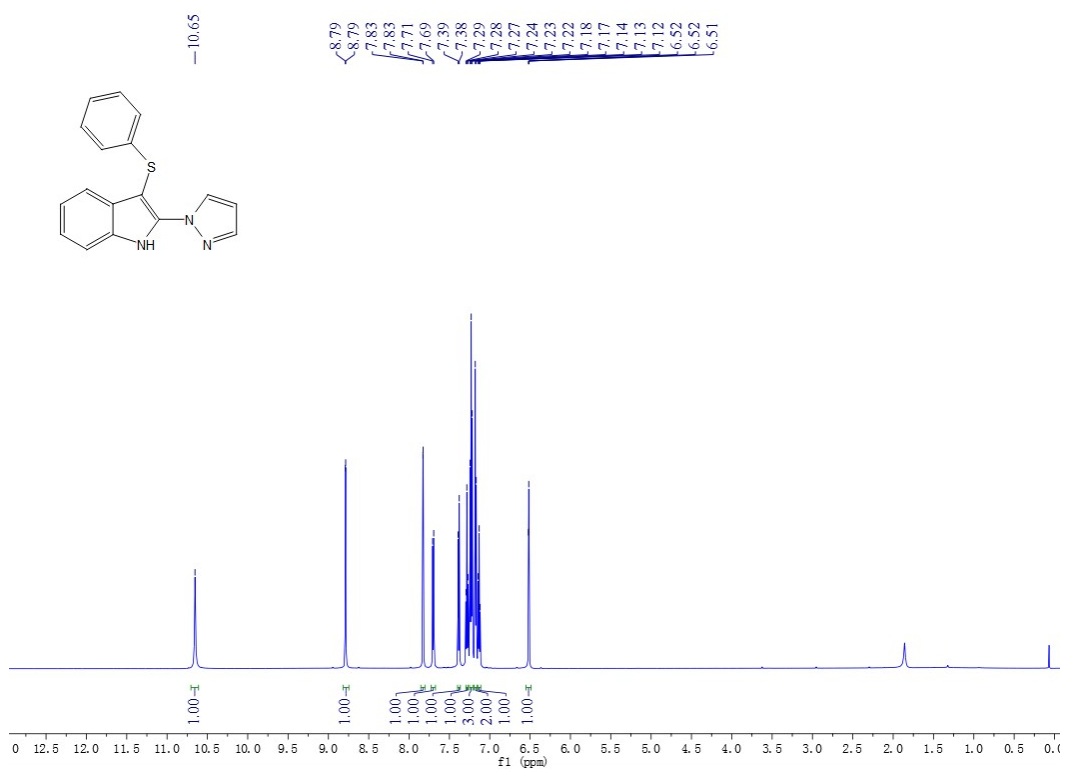

**(85)  $^{13}\text{C}$ -NMR (151 MHz,  $\text{CDCl}_3$ ) spectrum of 41**

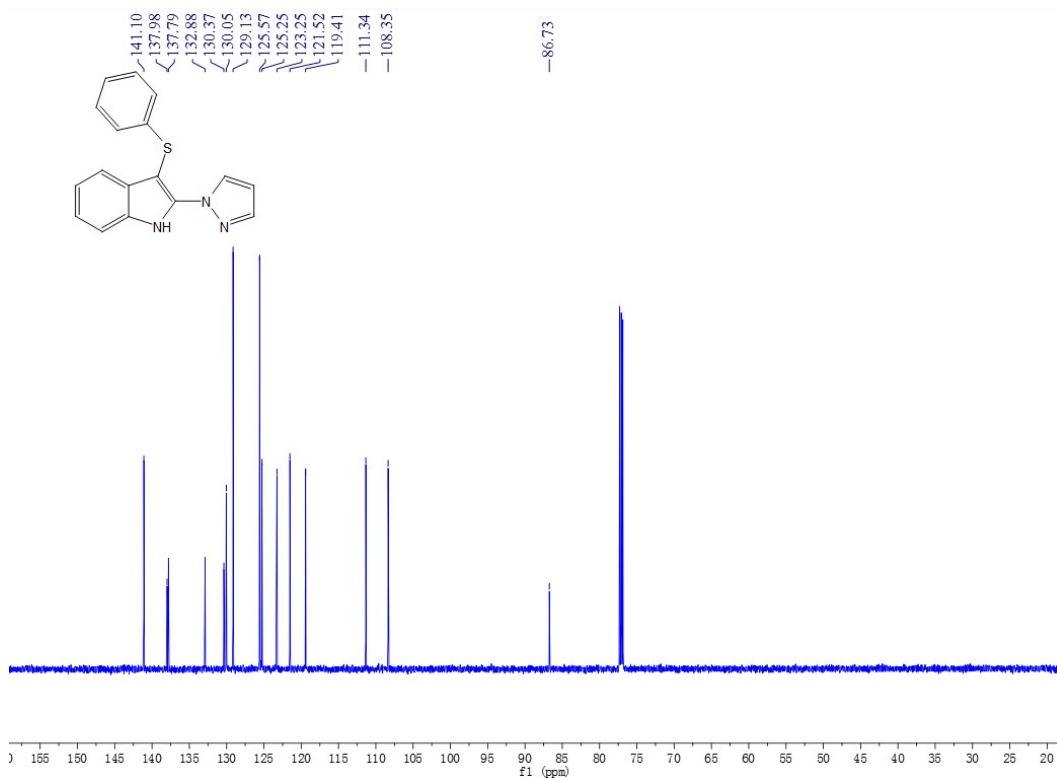

**(86)  $^1\text{H}$ -NMR (600 MHz,  $\text{CDCl}_3$ ) spectrum of 42**

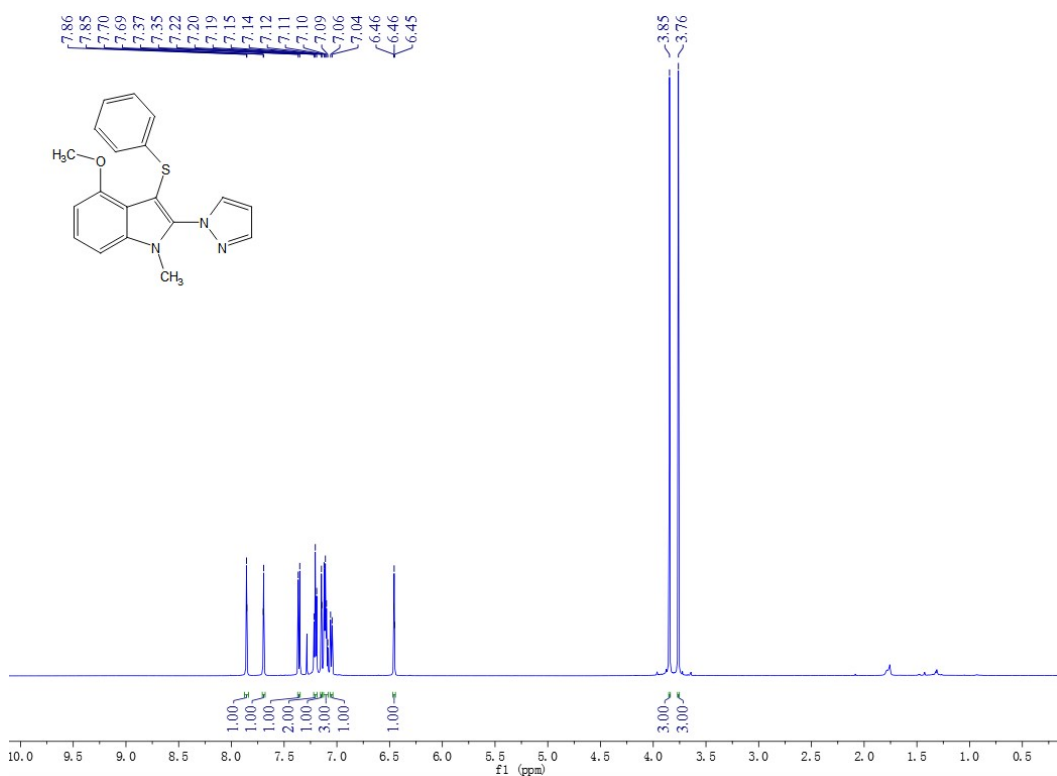

**(87)  $^{13}\text{C}$ -NMR (151 MHz,  $\text{CDCl}_3$ ) spectrum of 42**

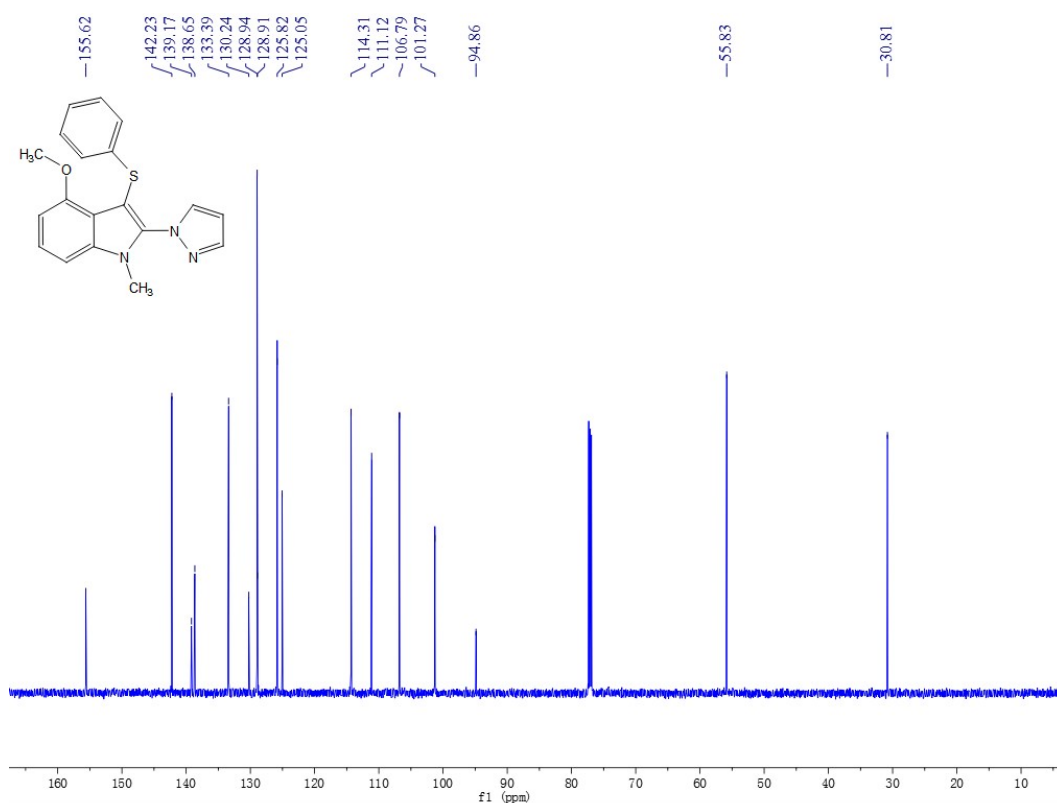

**(88)  $^1\text{H}$ -NMR (600 MHz,  $\text{CDCl}_3$ ) spectrum of 43**

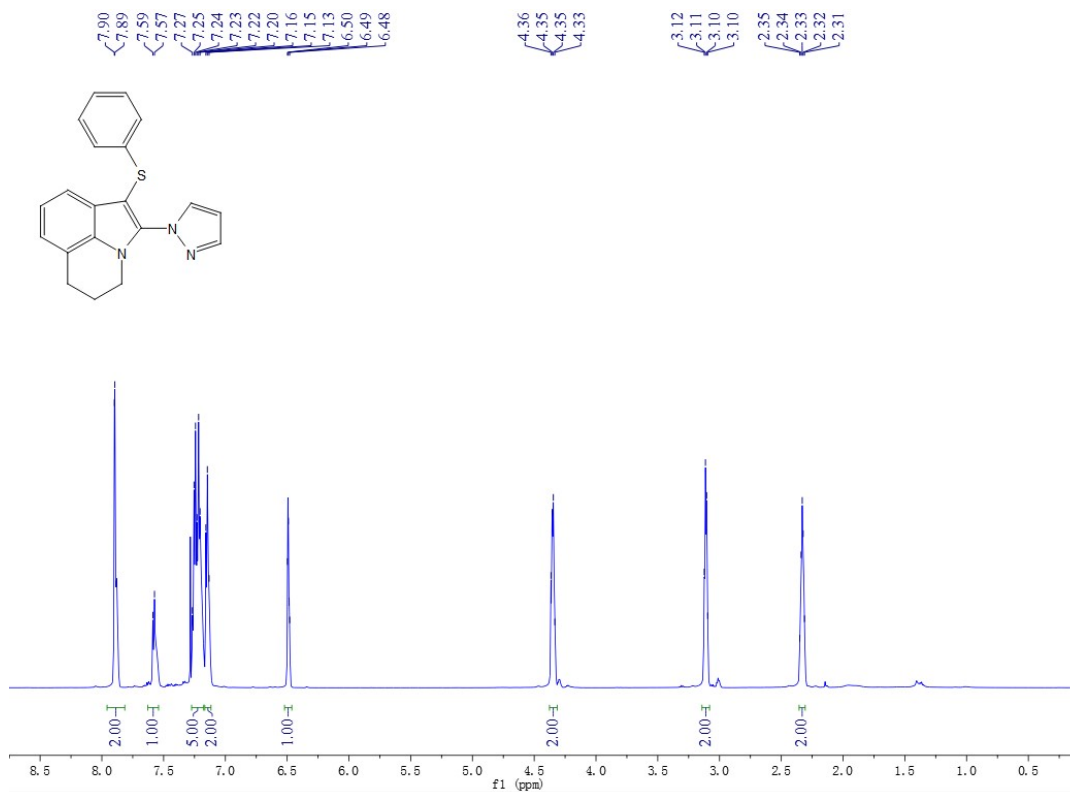

**(89)  $^{13}\text{C}$ -NMR (151 MHz,  $\text{CDCl}_3$ ) spectrum of 43**

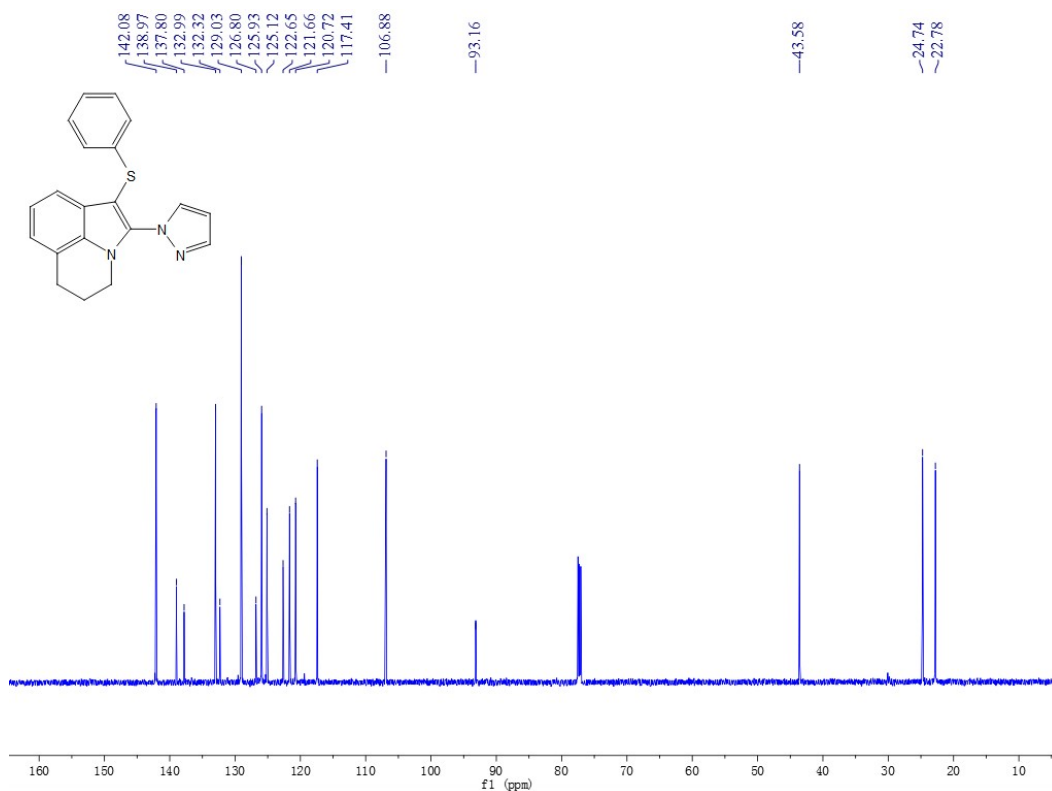

**(90)  $^1\text{H}$ -NMR (600 MHz,  $\text{CDCl}_3$ ) spectrum of 44**

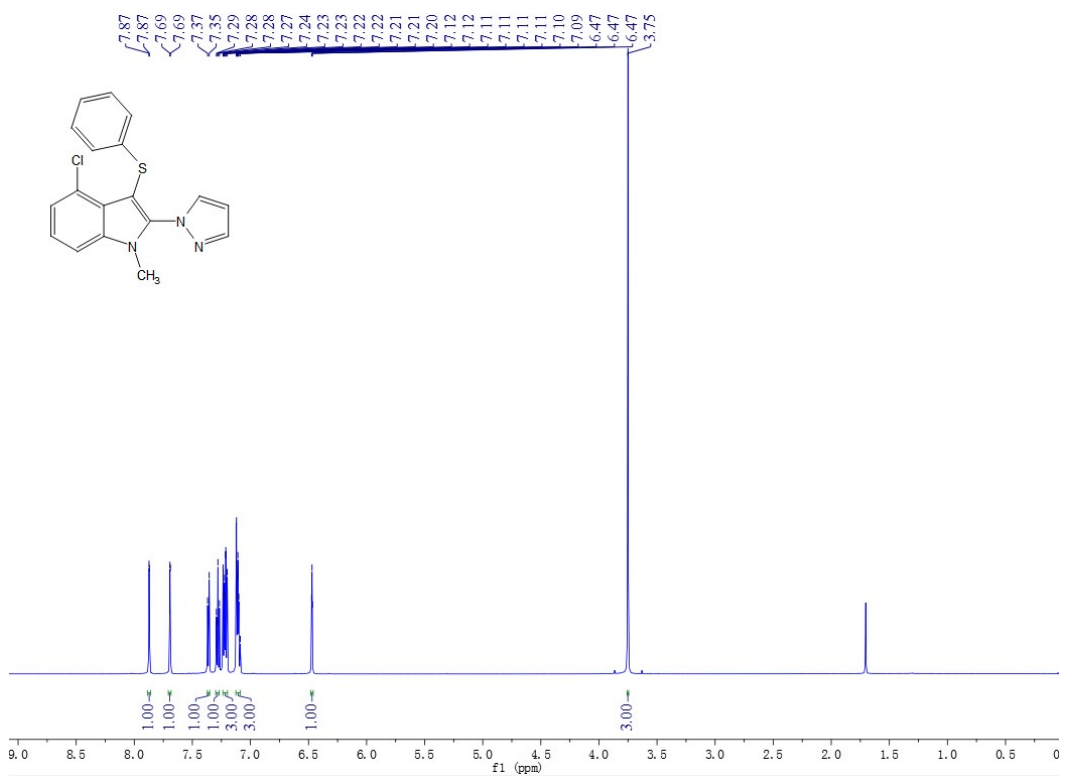

**(91)  $^{13}\text{C}$ -NMR (151 MHz,  $\text{CDCl}_3$ ) spectrum of 44**

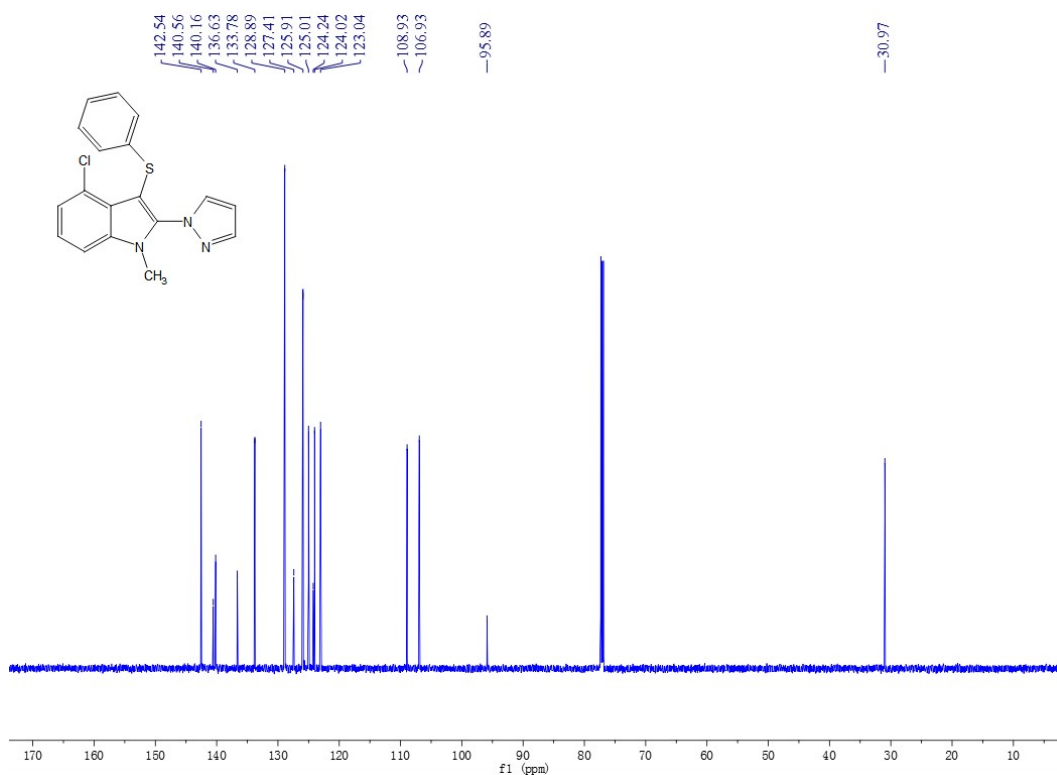

**(92)  $^1\text{H}$ -NMR (600 MHz,  $\text{CDCl}_3$ ) spectrum of 45**

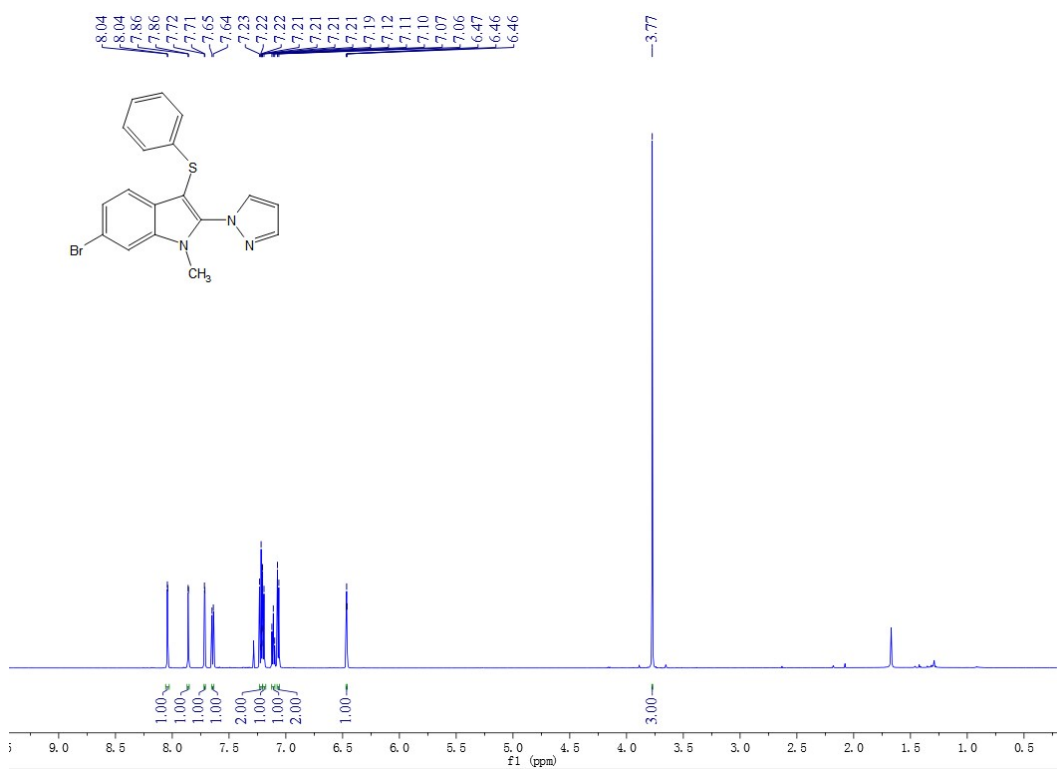



**(93)  $^{13}\text{C}$ -NMR (151 MHz,  $\text{CDCl}_3$ ) spectrum of 45**

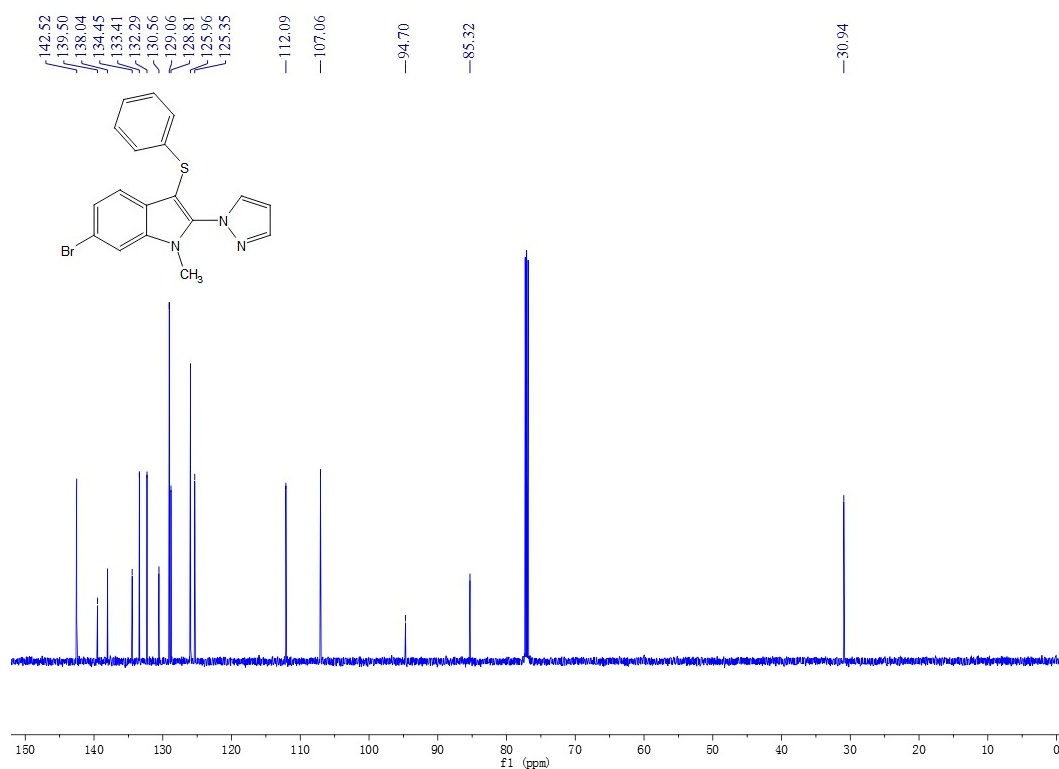

**(94)  $^1\text{H}$ -NMR (600 MHz,  $\text{CDCl}_3$ ) spectrum of 46**

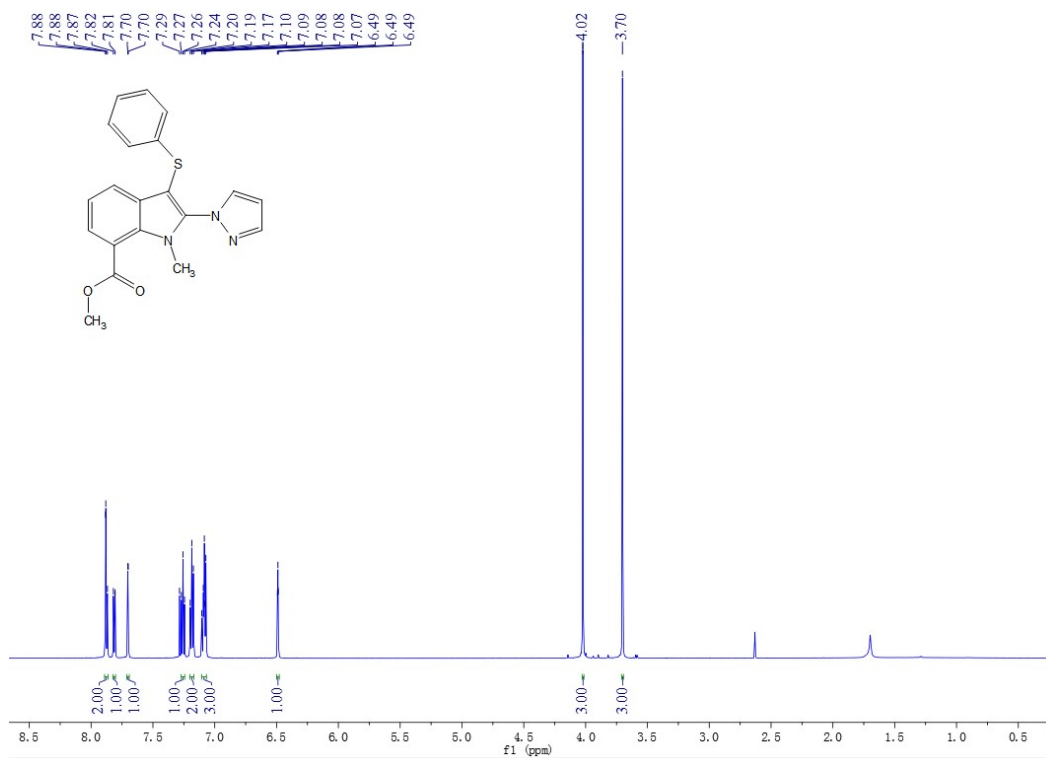

(95)  $^{13}\text{C}$ -NMR (151 MHz,  $\text{CDCl}_3$ ) spectrum of 46

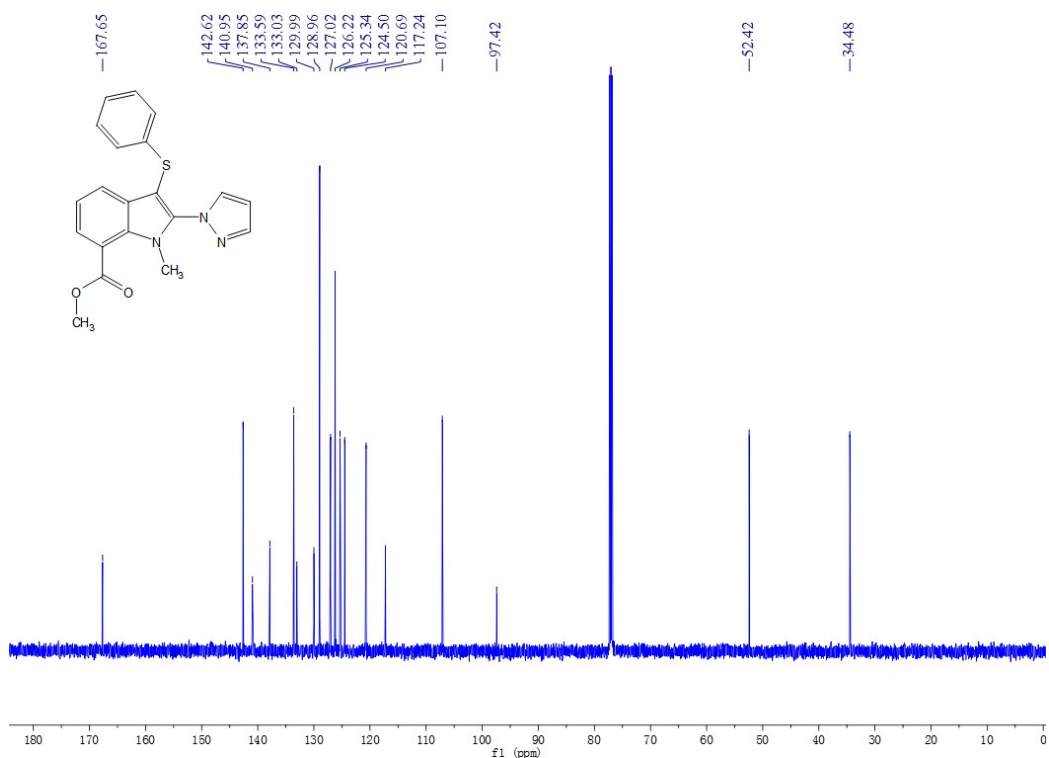

(96)  $^1\text{H}$ -NMR (600 MHz,  $\text{CDCl}_3$ ) spectrum of 47

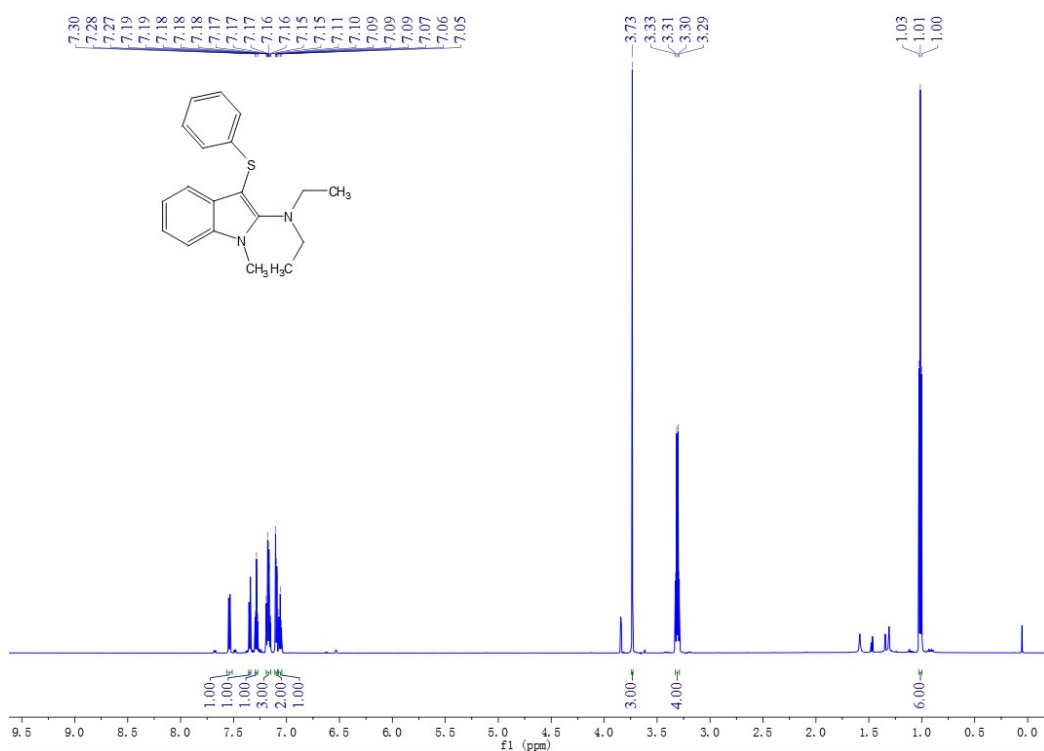

**(97)  $^{13}\text{C}$ -NMR (151 MHz,  $\text{CDCl}_3$ ) spectrum of 47**

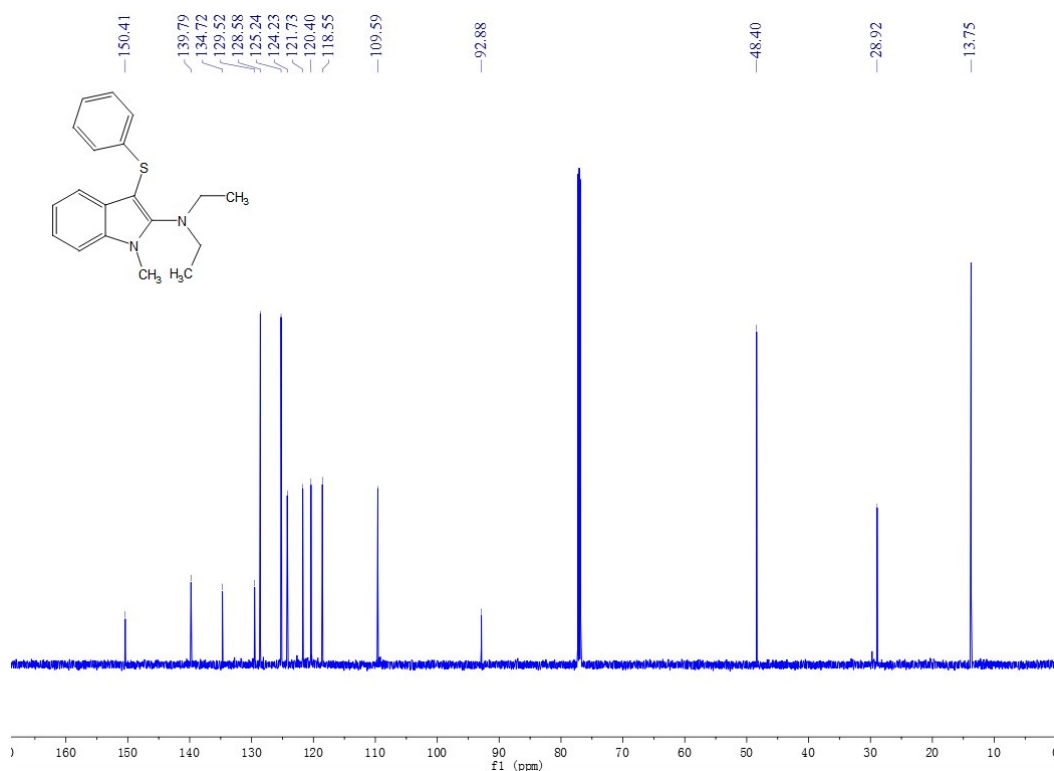

**(98)  $^1\text{H}$ -NMR (600 MHz,  $\text{CDCl}_3$ ) spectrum of 48**

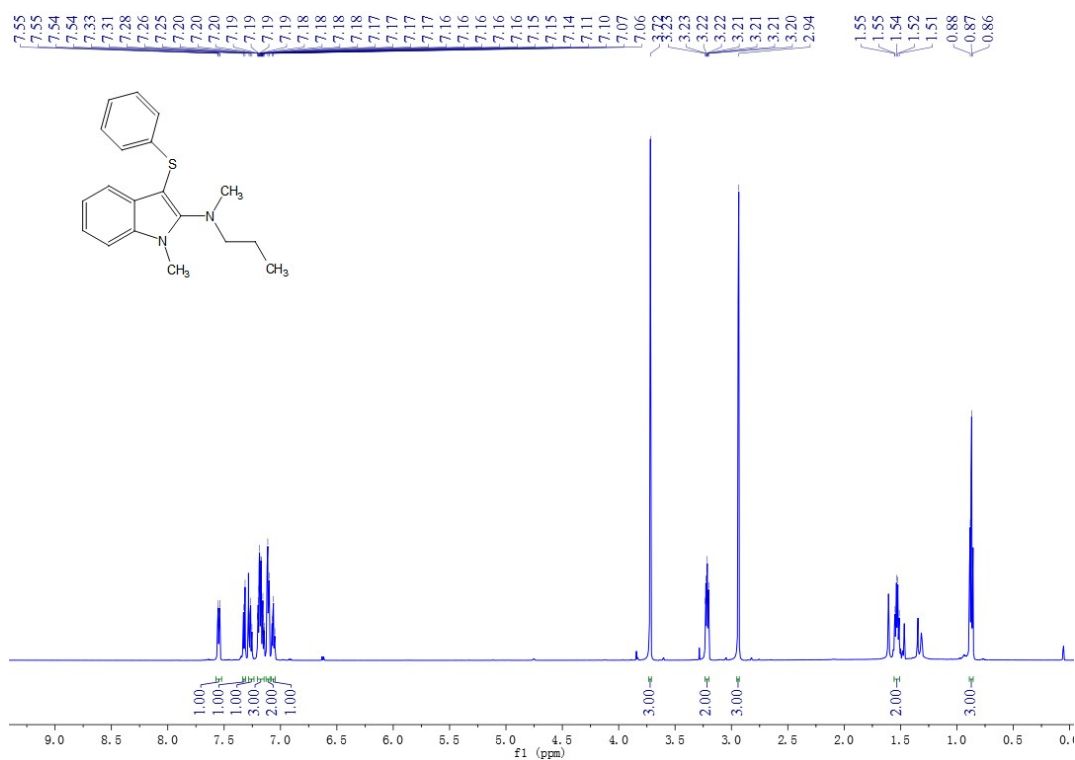

**(99)  $^{13}\text{C}$ -NMR (151 MHz,  $\text{CDCl}_3$ ) spectrum of 48**

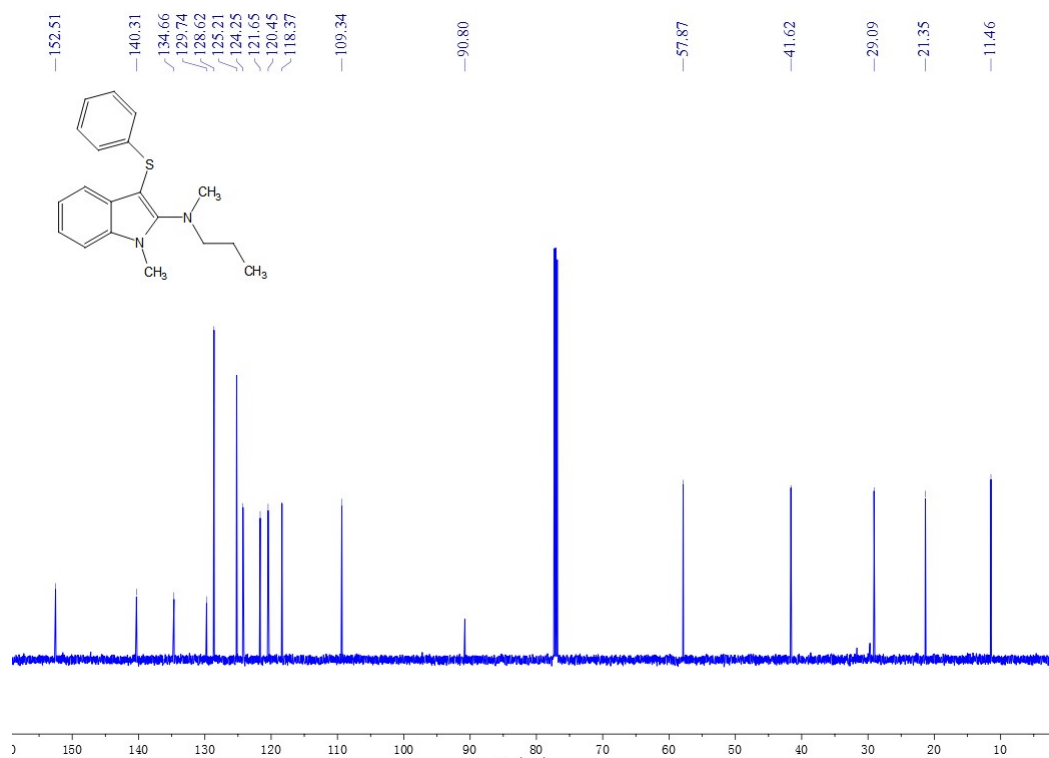

**(100)  $^1\text{H}$ -NMR (600 MHz,  $\text{CDCl}_3$ ) spectrum of 49**

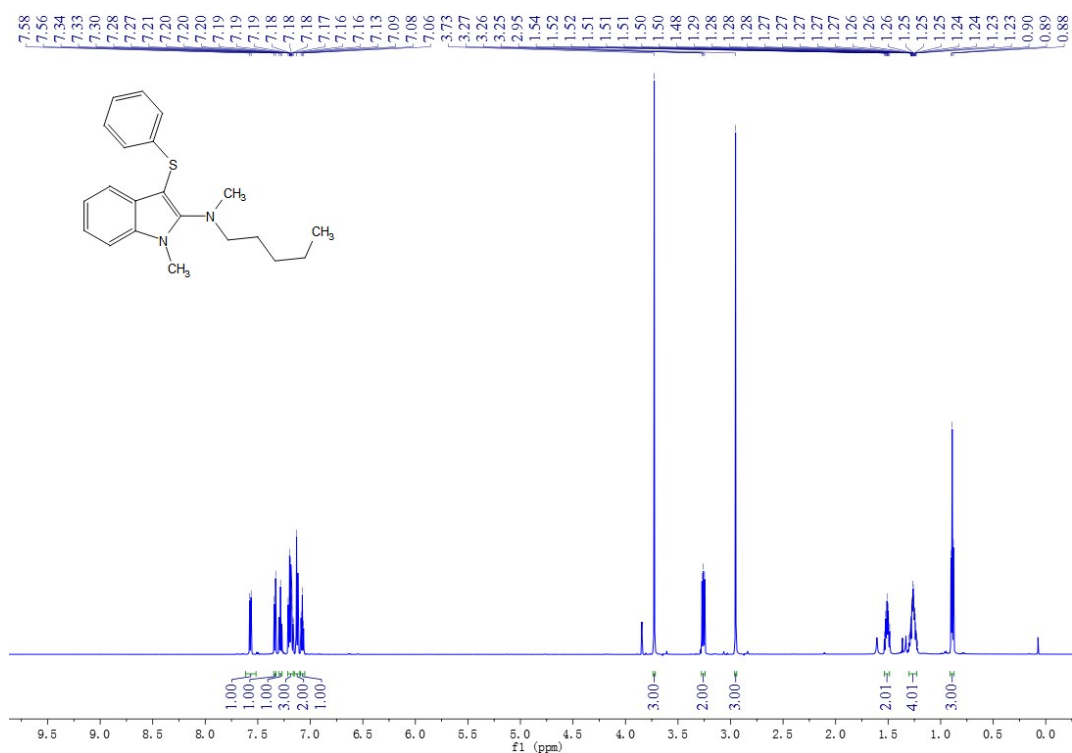

(101)  $^{13}\text{C}$ -NMR (151 MHz,  $\text{CDCl}_3$ ) spectrum of 49

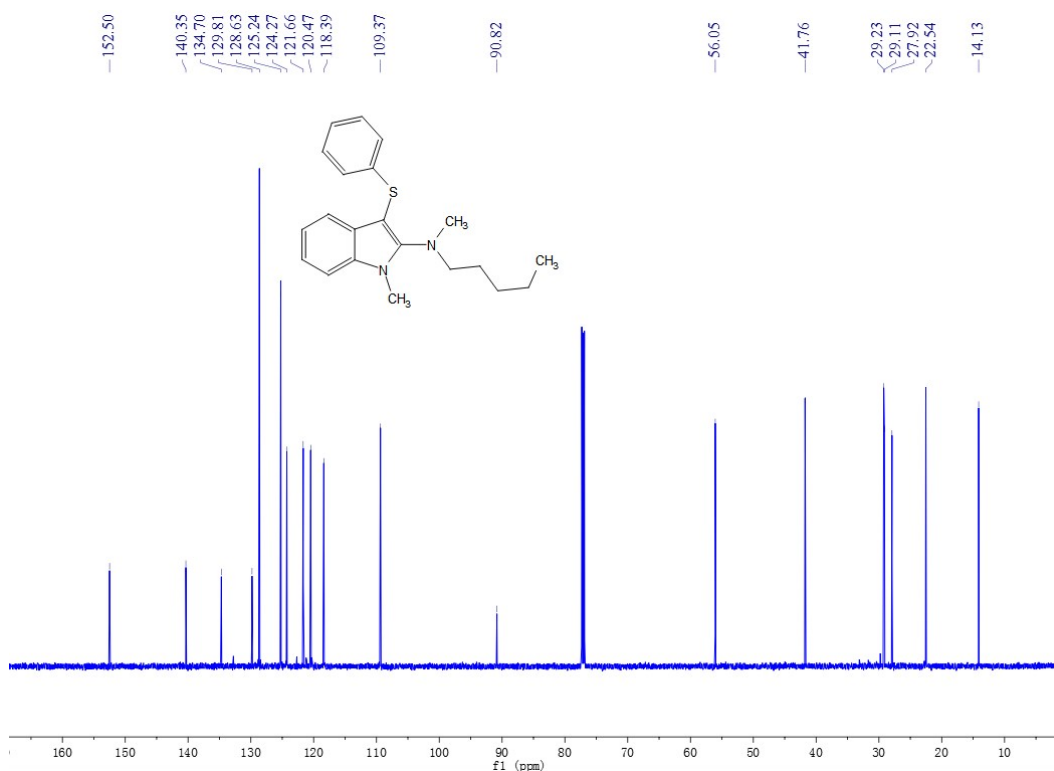

(102)  $^1\text{H}$ -NMR (600 MHz,  $\text{CDCl}_3$ ) spectrum of 50

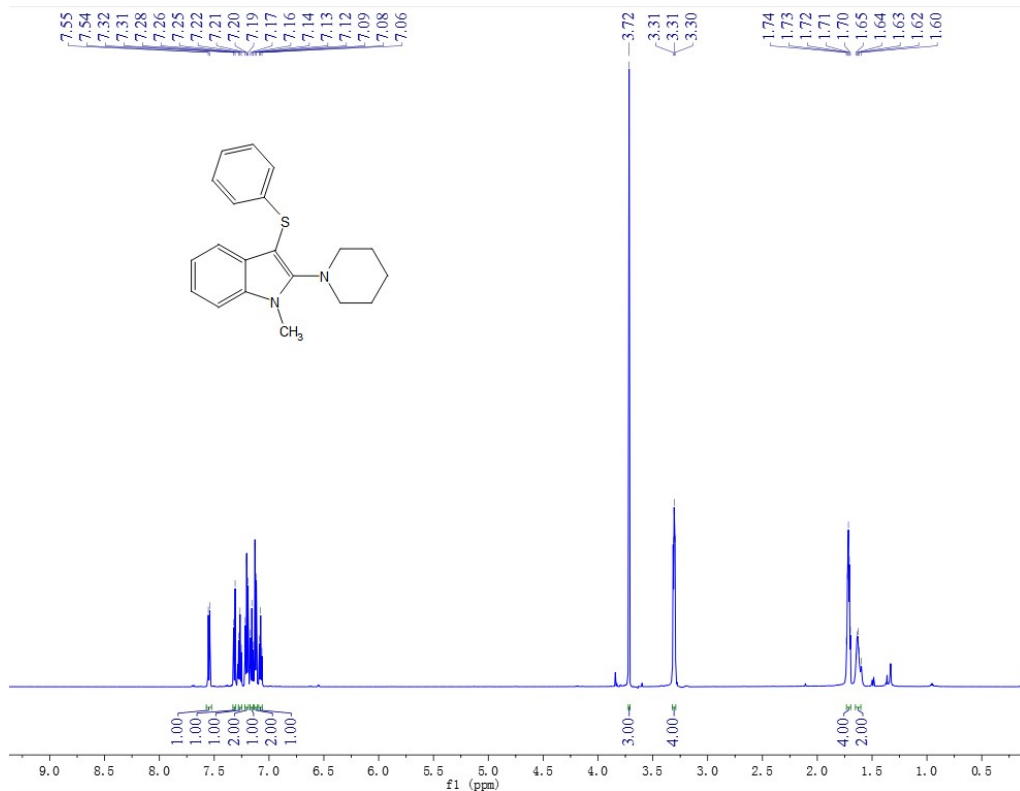

(103)  $^{13}\text{C}$ -NMR (151 MHz,  $\text{CDCl}_3$ ) spectrum of 50

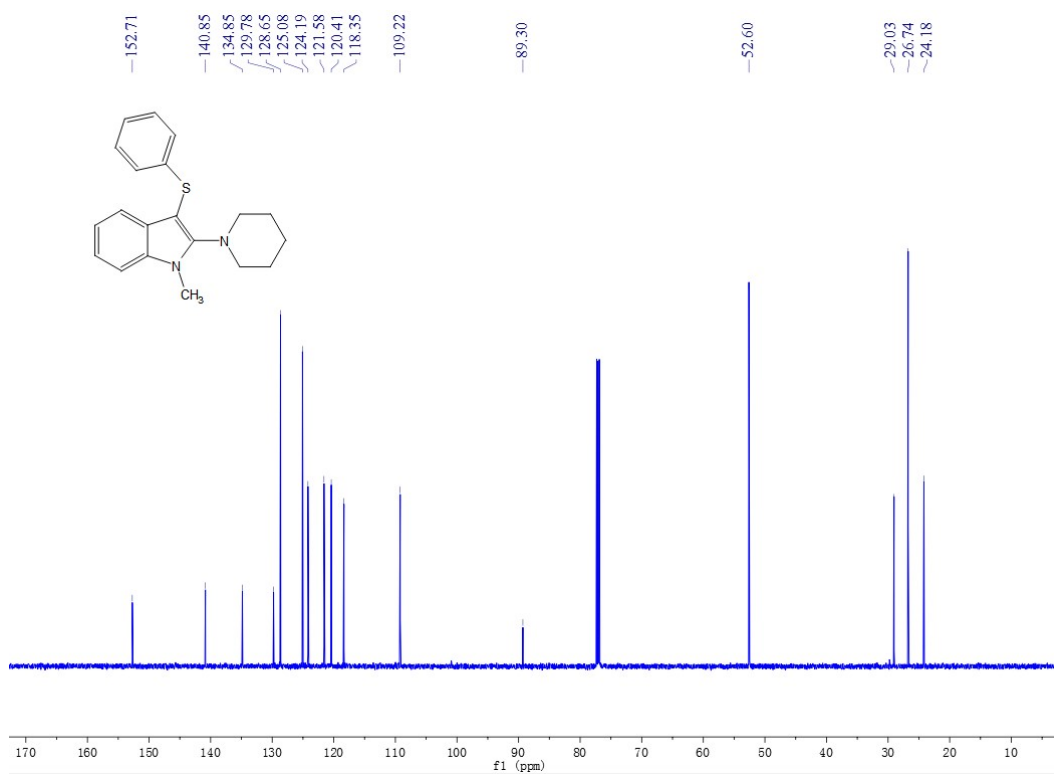

(104)  $^1\text{H}$ -NMR (600 MHz,  $\text{CDCl}_3$ ) spectrum of 51

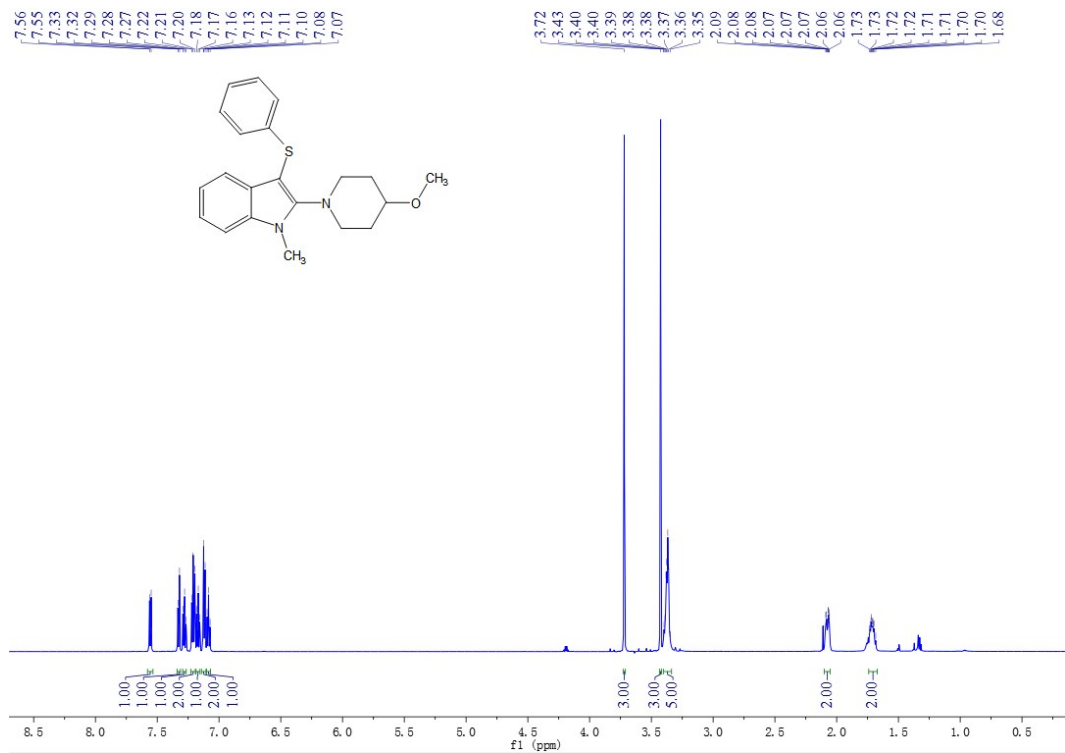

(105)  $^{13}\text{C}$ -NMR (151 MHz,  $\text{CDCl}_3$ ) spectrum of 51

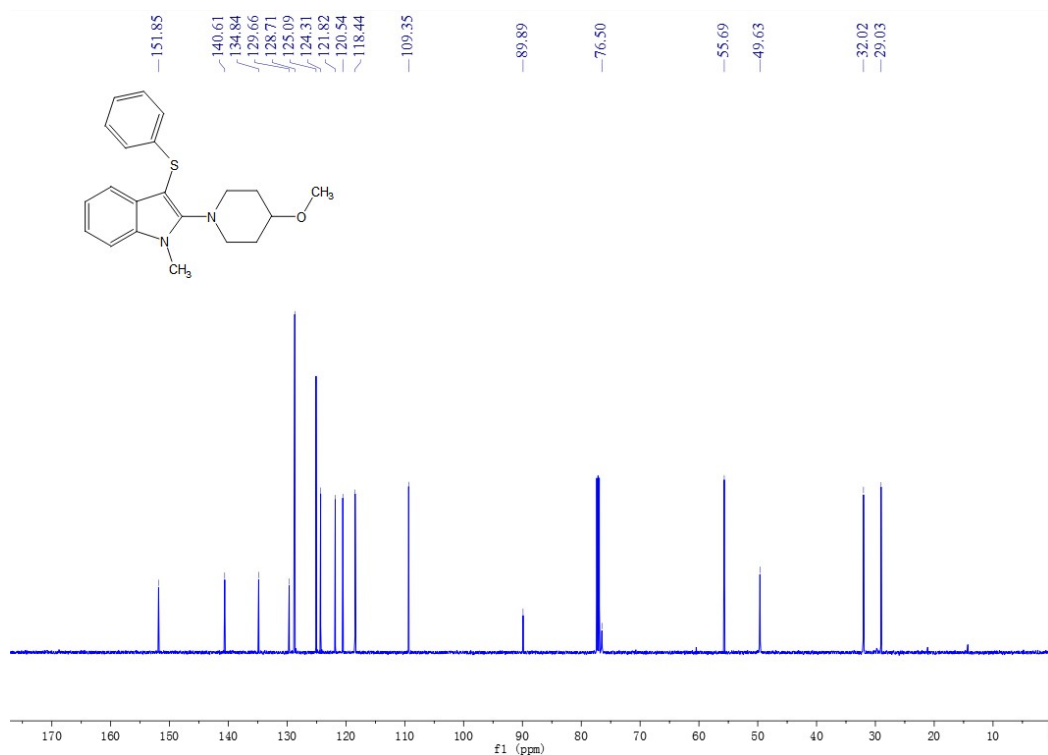

(106)  $^1\text{H}$ -NMR (600 MHz,  $\text{CDCl}_3$ ) spectrum of 52

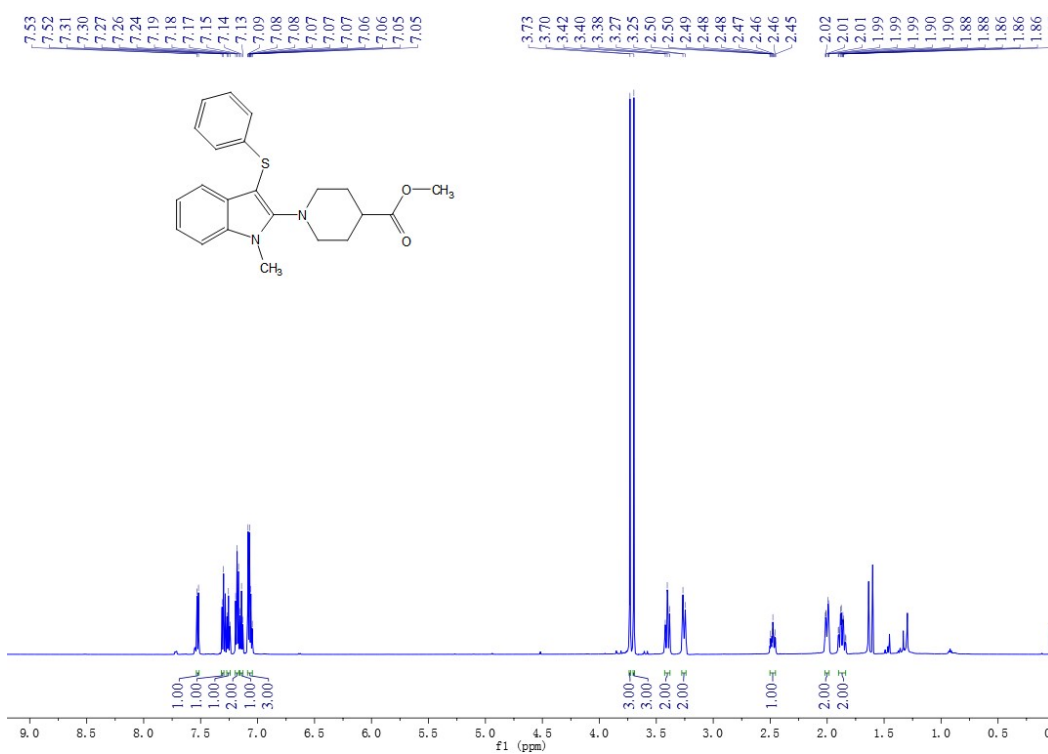

(107)  $^{13}\text{C}$ -NMR (151 MHz,  $\text{CDCl}_3$ ) spectrum of 52

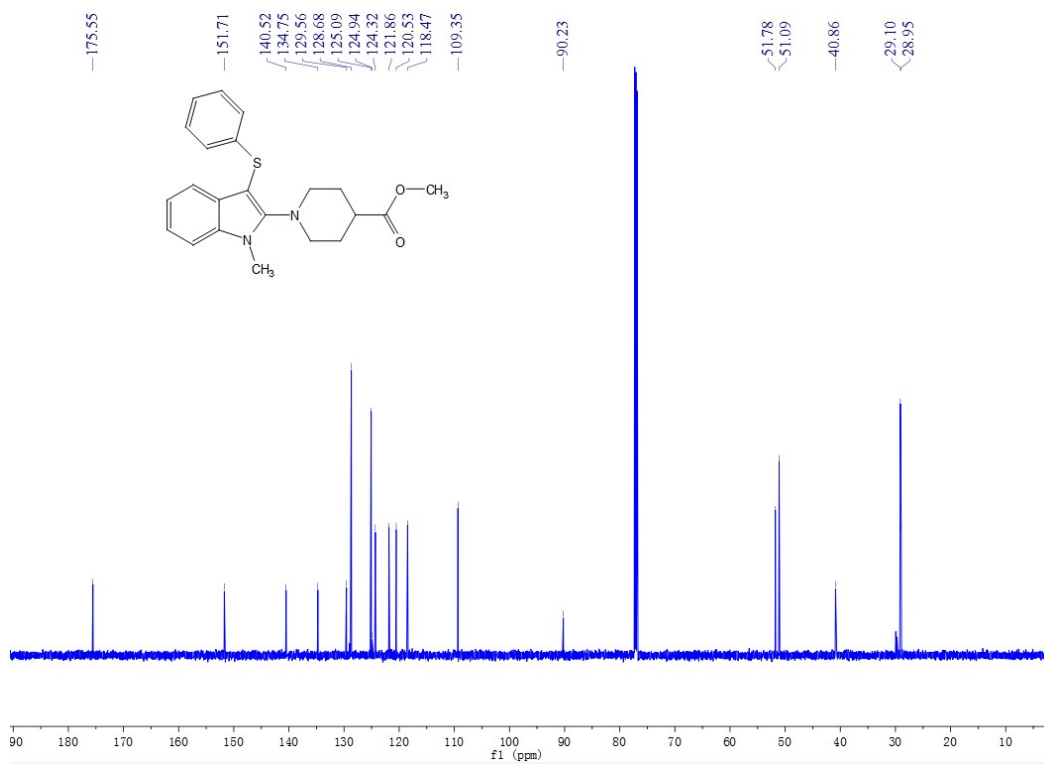

(108)  $^1\text{H}$ -NMR (600 MHz,  $\text{CDCl}_3$ ) spectrum of 53

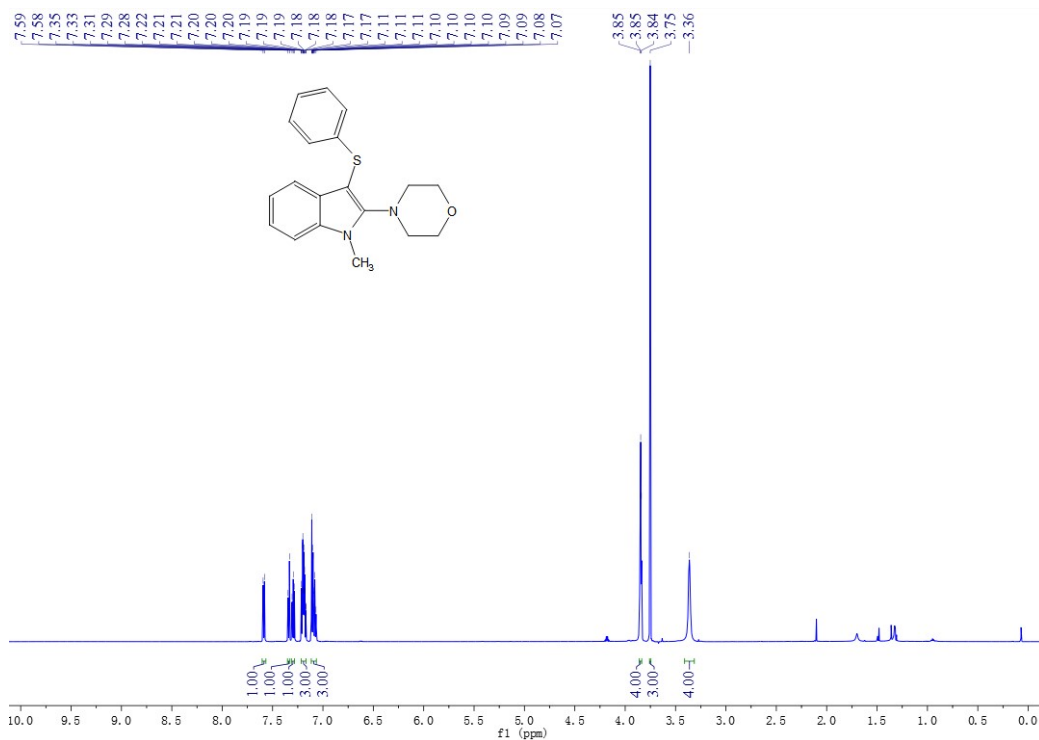



(109)  $^{13}\text{C}$ -NMR (151 MHz,  $\text{CDCl}_3$ ) spectrum of 53

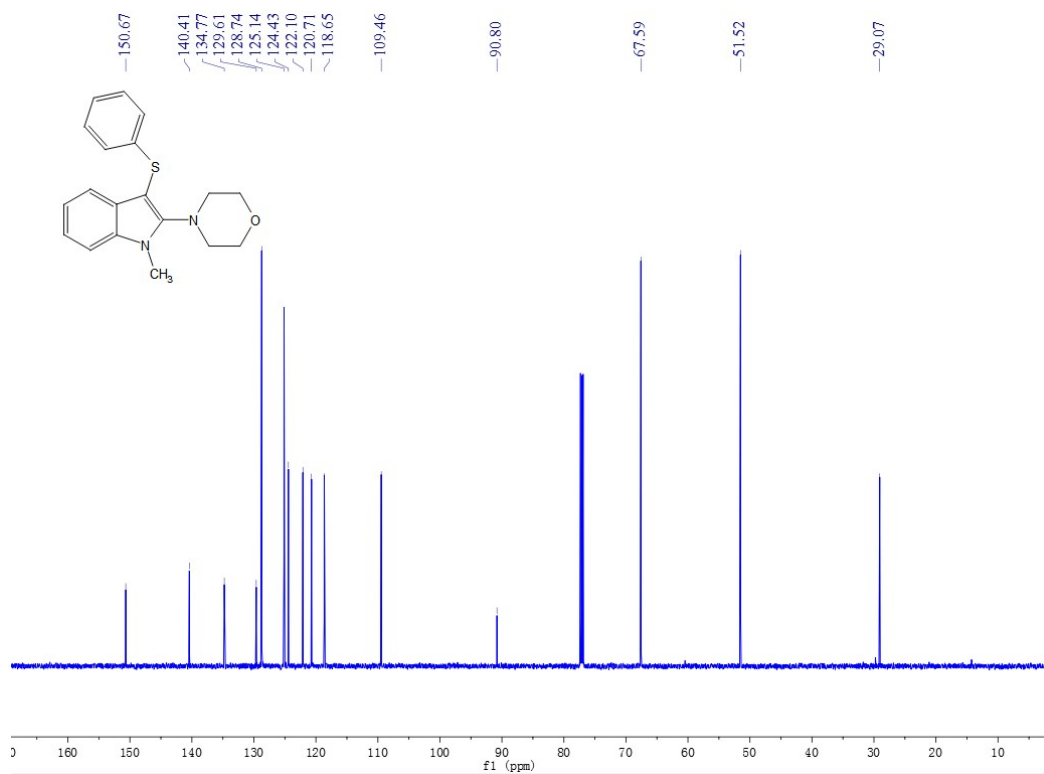

(110)  $^1\text{H}$ -NMR (600 MHz,  $\text{CDCl}_3$ ) spectrum of 54

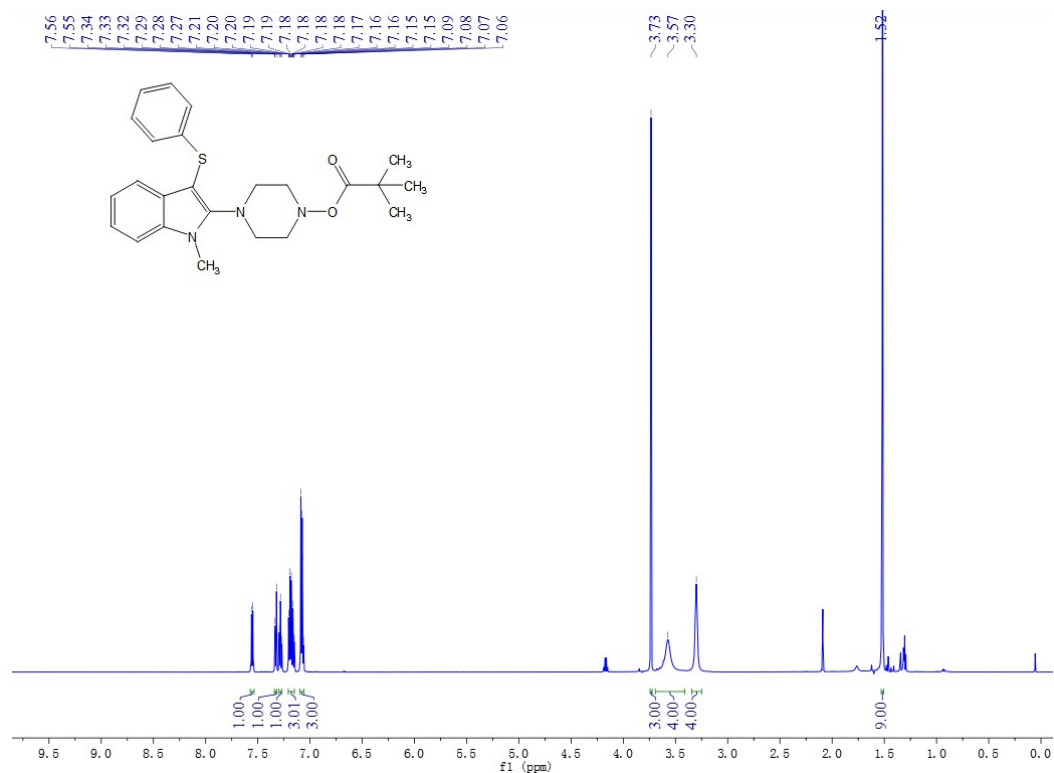

(111)  $^{13}\text{C}$ -NMR (151 MHz,  $\text{CDCl}_3$ ) spectrum of 54

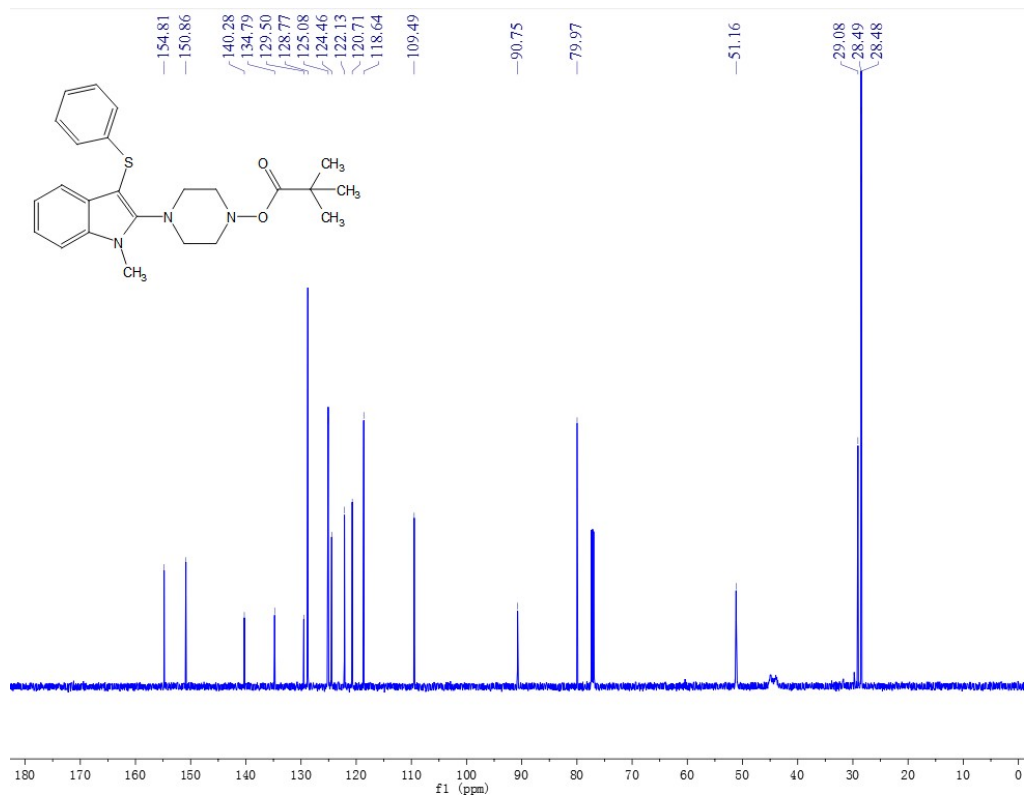

(112)  $^1\text{H}$ -NMR (600 MHz,  $\text{CDCl}_3$ ) spectrum of 55

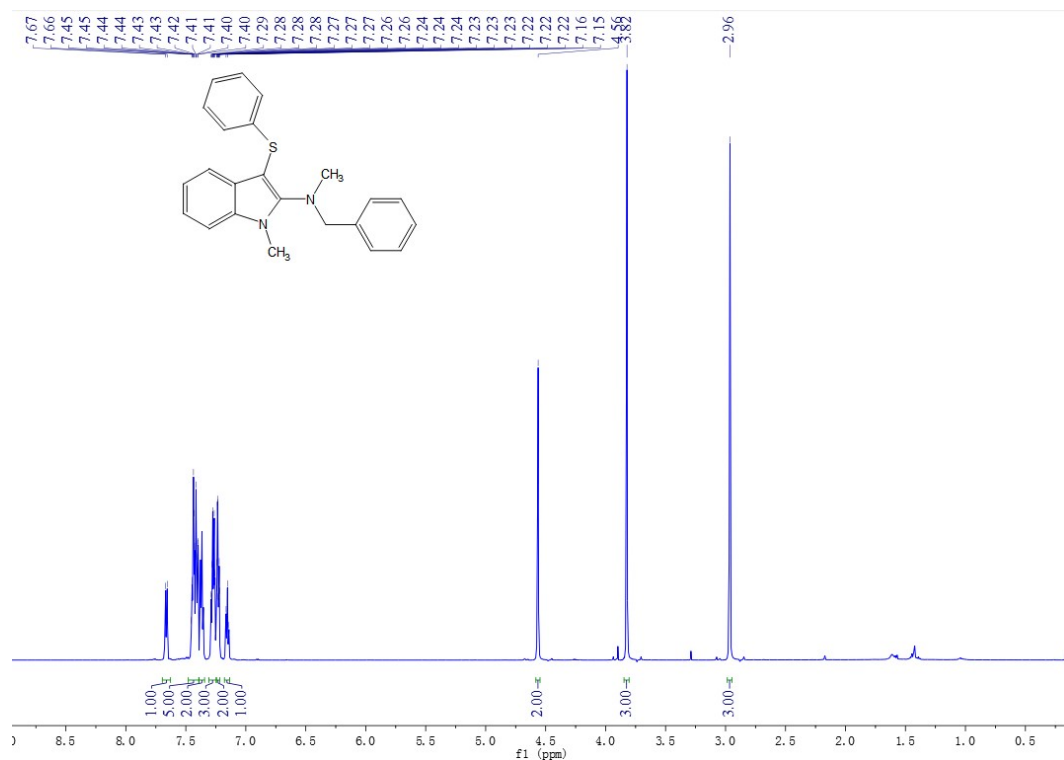

(113)  $^{13}\text{C}$ -NMR (151 MHz,  $\text{CDCl}_3$ ) spectrum of 55

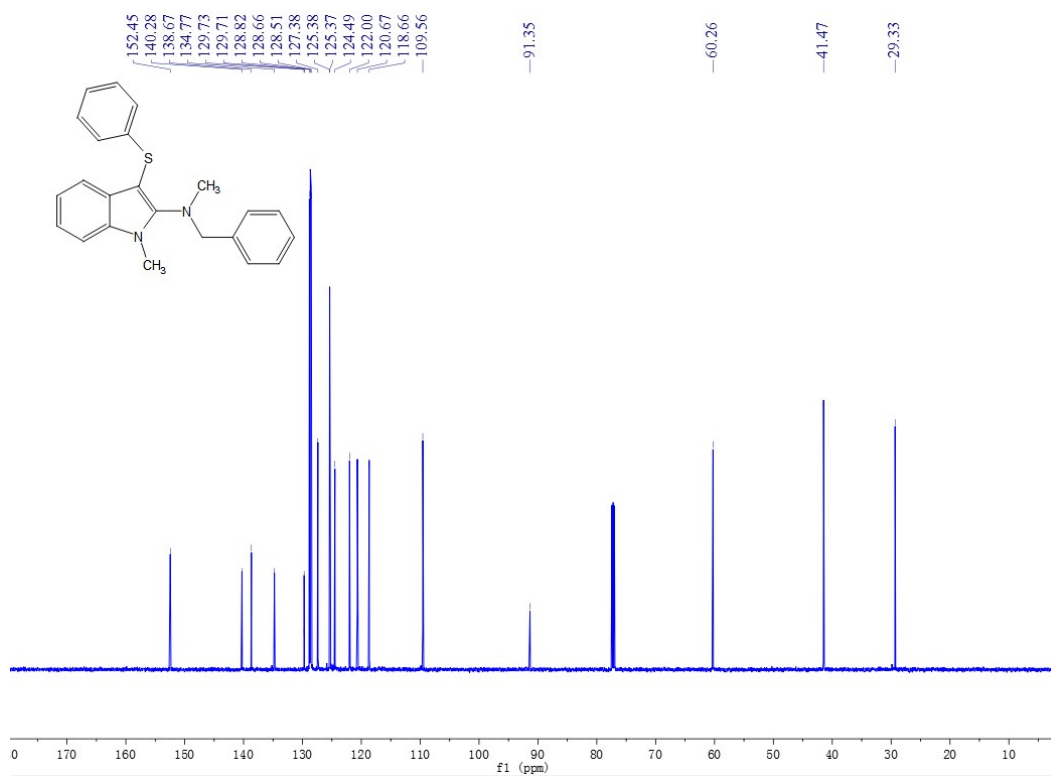

(114)  $^1\text{H}$ -NMR (600 MHz,  $\text{CDCl}_3$ ) spectrum of 56

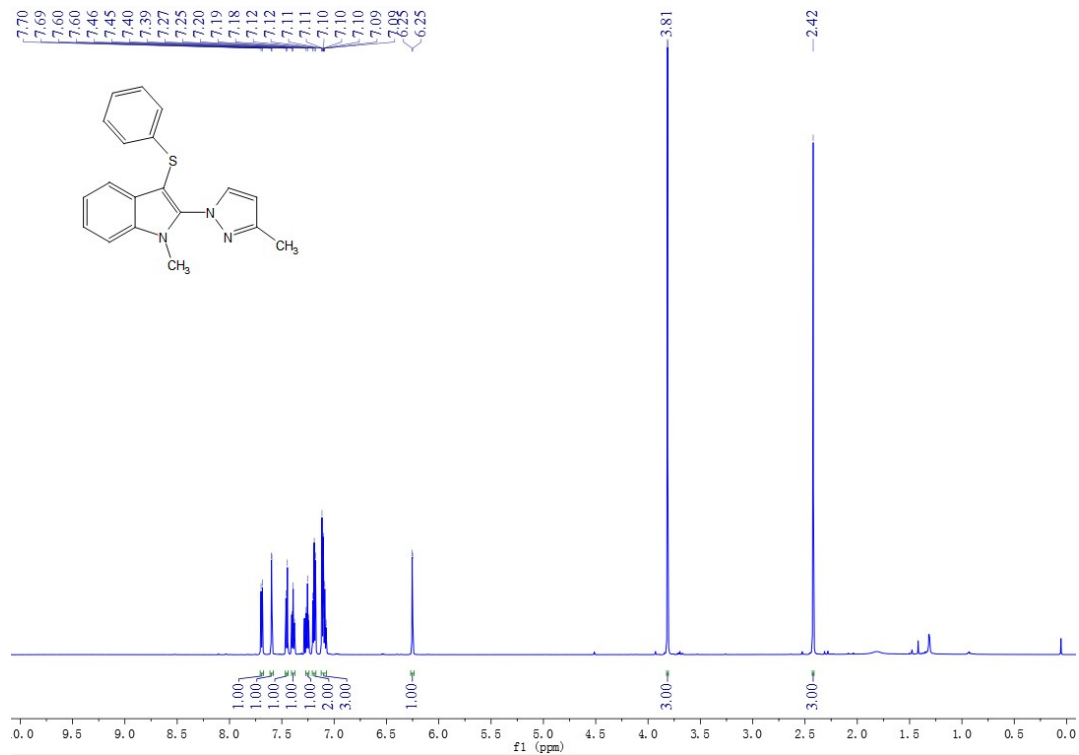

(115)  $^{13}\text{C}$ -NMR (151 MHz,  $\text{CDCl}_3$ ) spectrum of 56

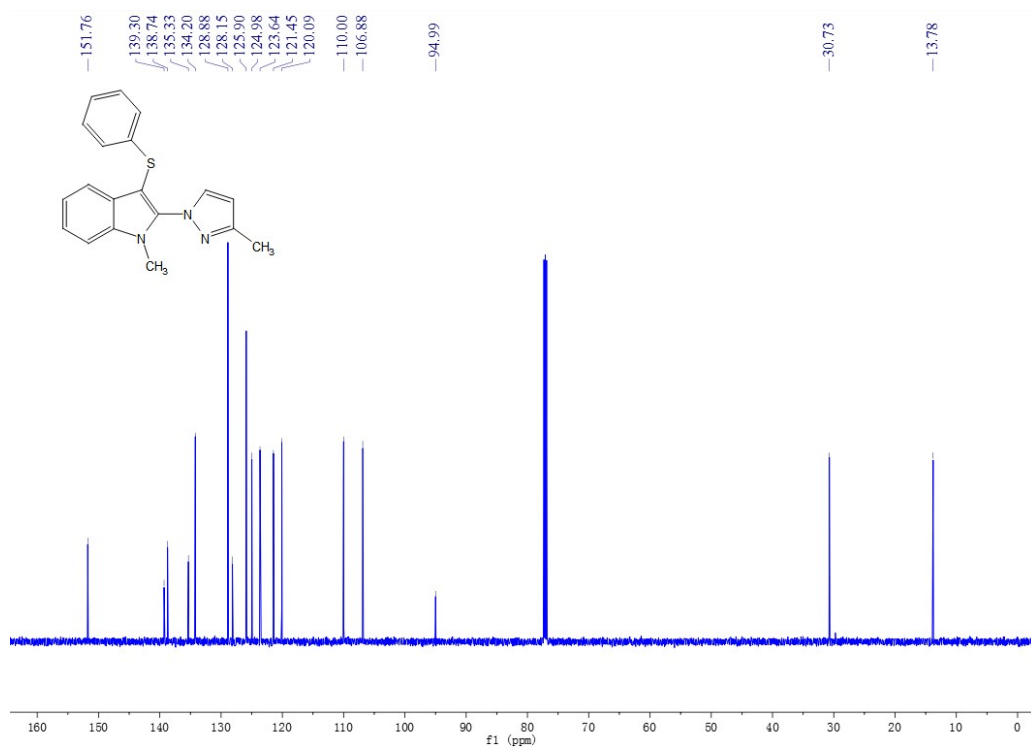

(116)  $^1\text{H}$ -NMR (600 MHz,  $\text{CDCl}_3$ ) spectrum of 57

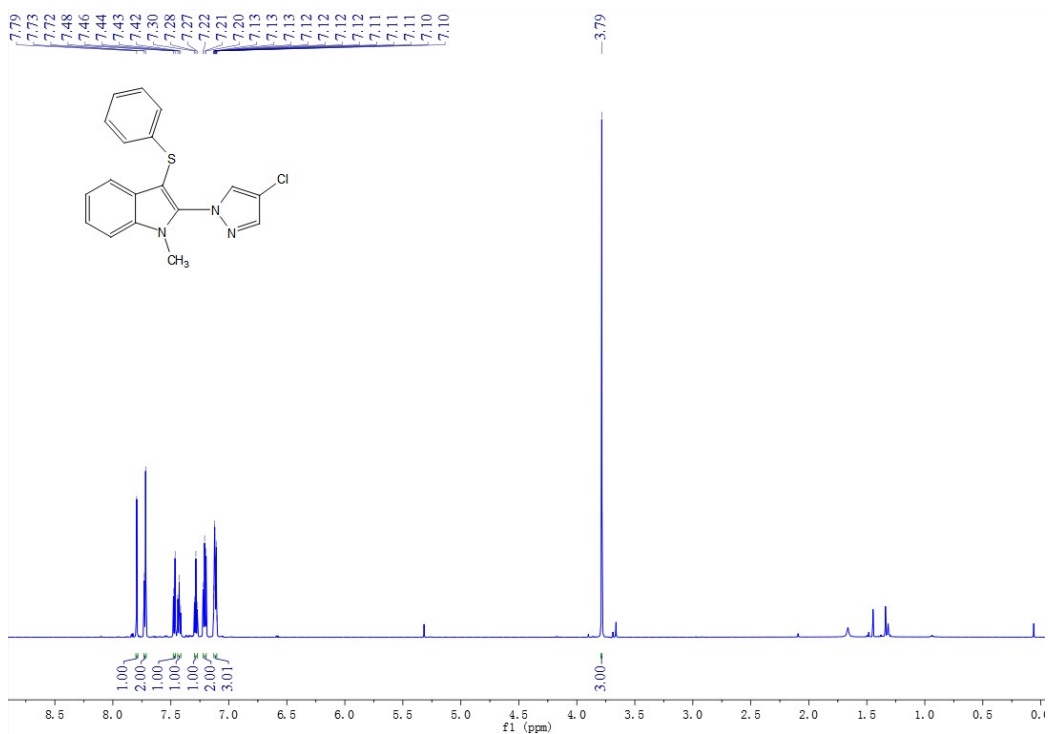

(117)  $^{13}\text{C}$ -NMR (151 MHz,  $\text{CDCl}_3$ ) spectrum of 57

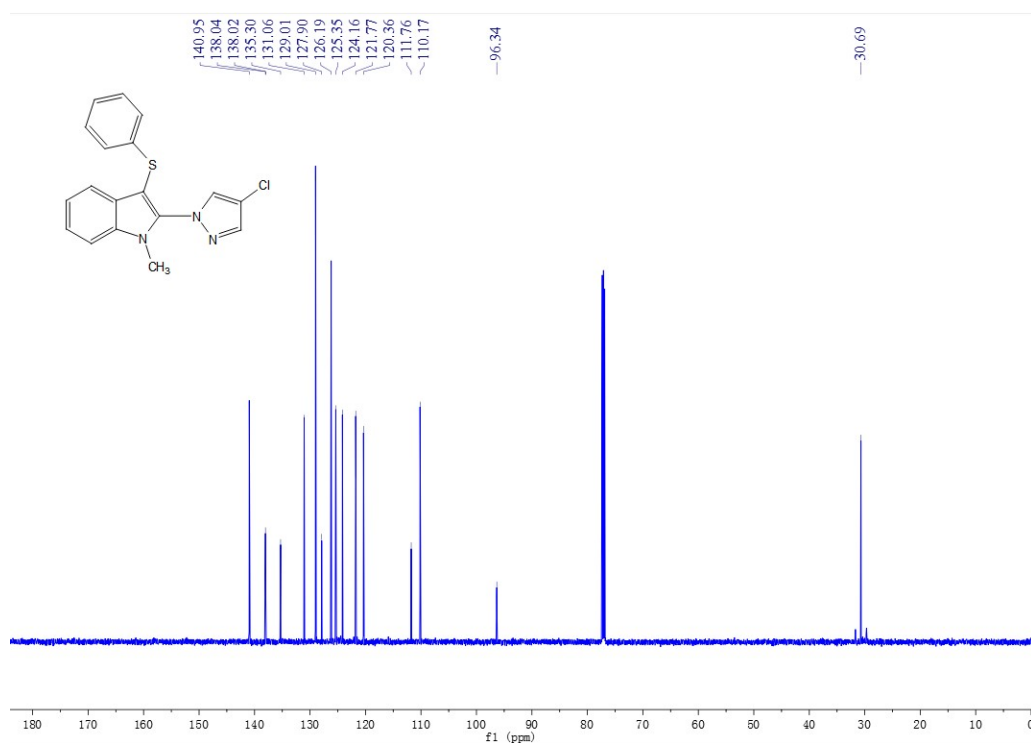

(118)  $^1\text{H}$ -NMR (600 MHz,  $\text{CDCl}_3$ ) spectrum of 58

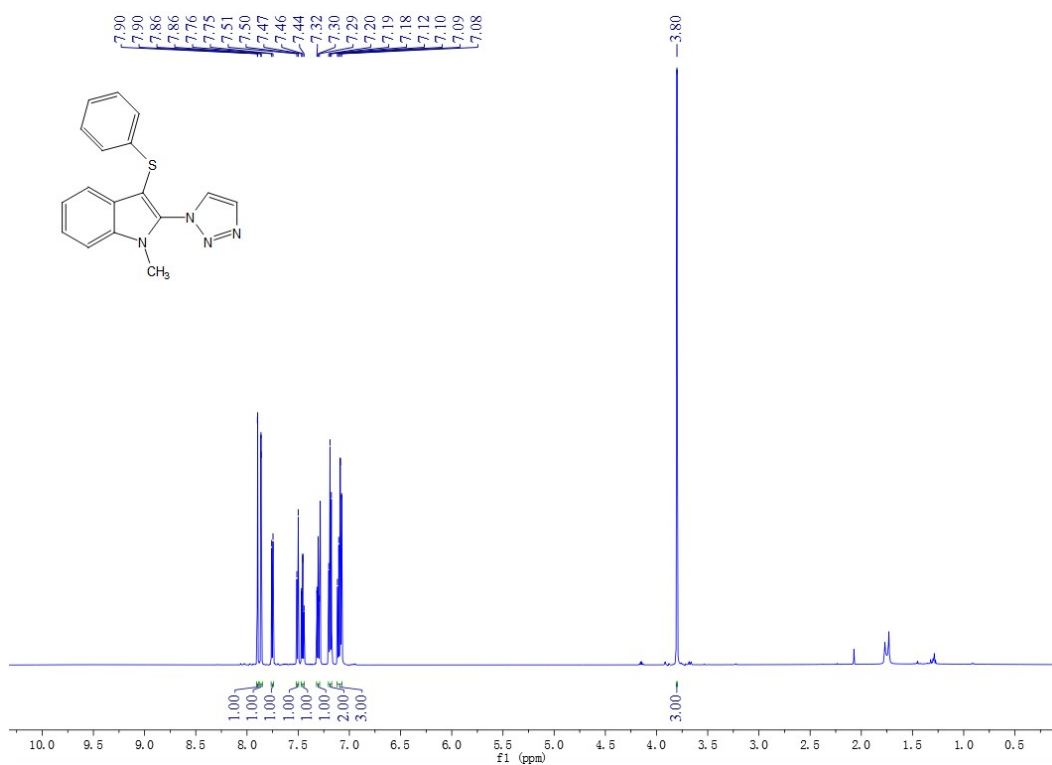

(119)  $^{13}\text{C}$ -NMR (151 MHz,  $\text{CDCl}_3$ ) spectrum of 58

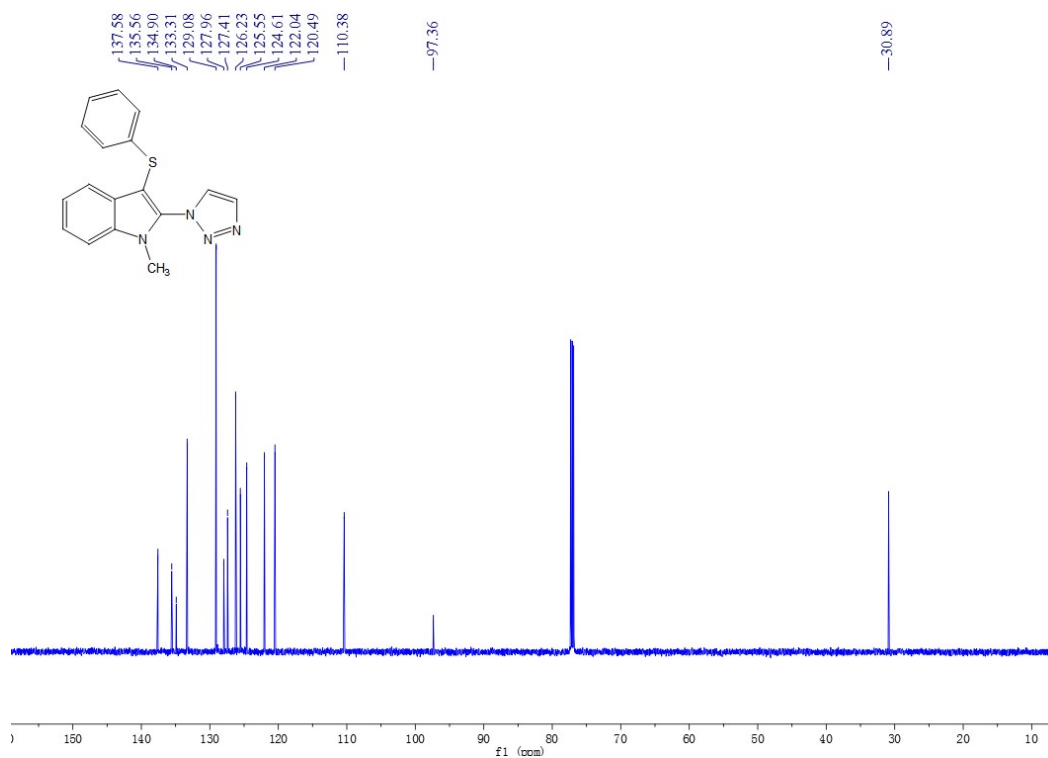

(120)  $^1\text{H}$ -NMR (600 MHz,  $\text{CDCl}_3$ ) spectrum of 59

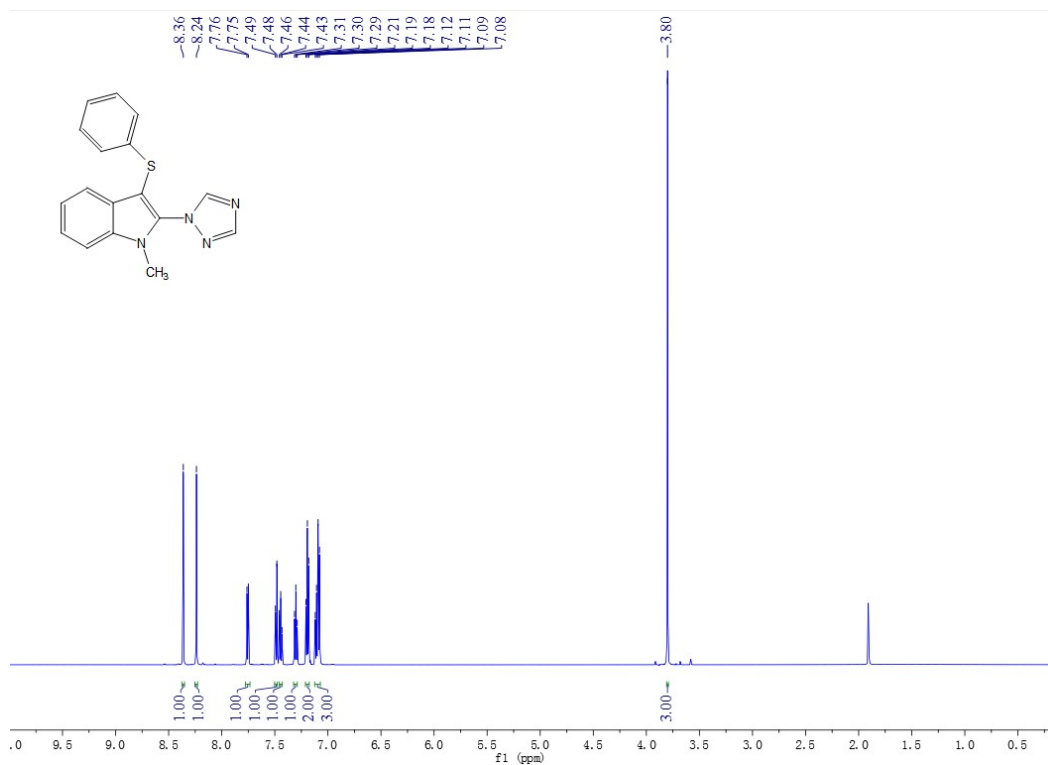

(121)  $^{13}\text{C}$ -NMR (151 MHz,  $\text{CDCl}_3$ ) spectrum of 59

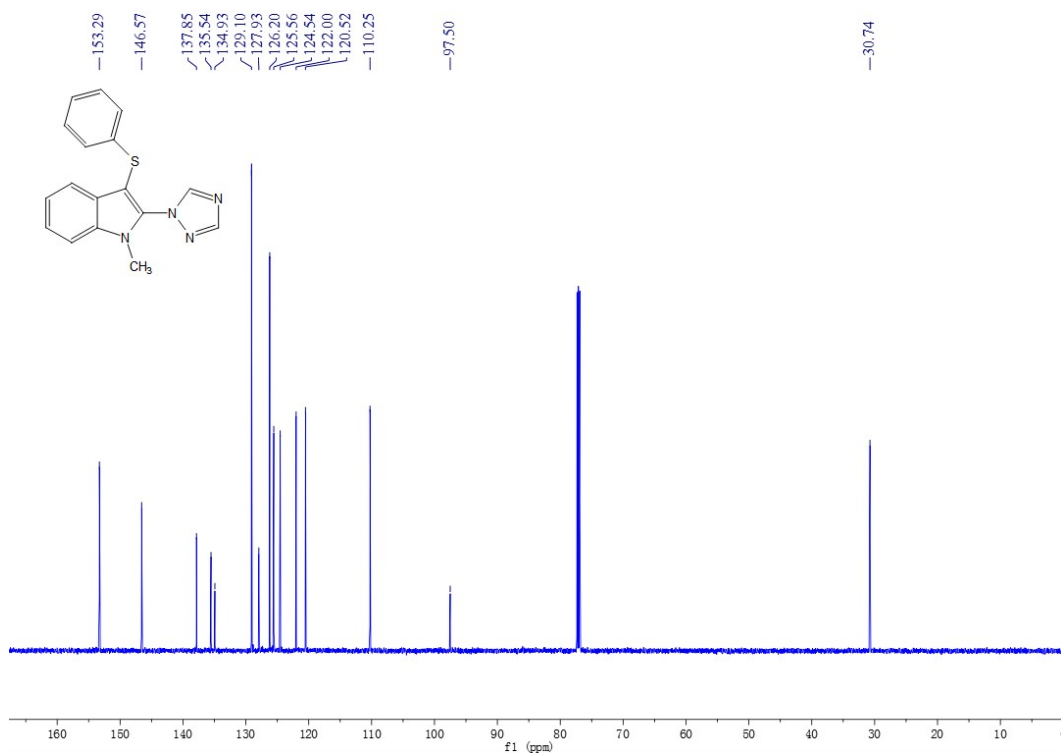

(122)  $^1\text{H}$ -NMR (600 MHz,  $\text{CDCl}_3$ ) spectrum of 60

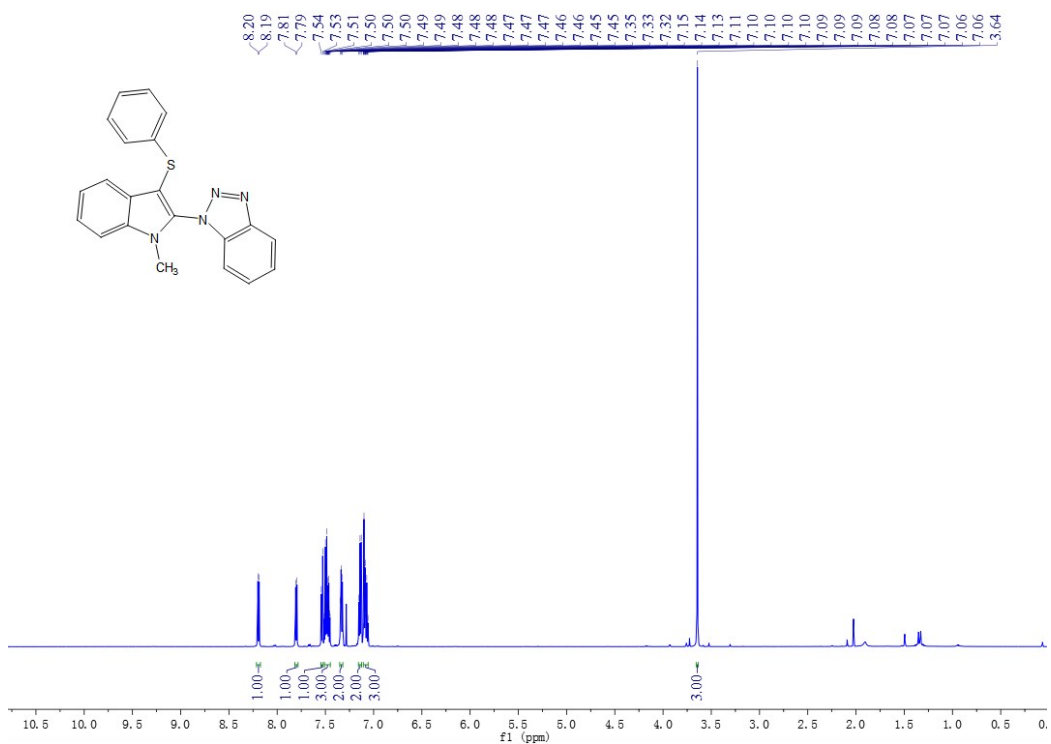

(123)  $^{13}\text{C}$ -NMR (151 MHz,  $\text{CDCl}_3$ ) spectrum of 60

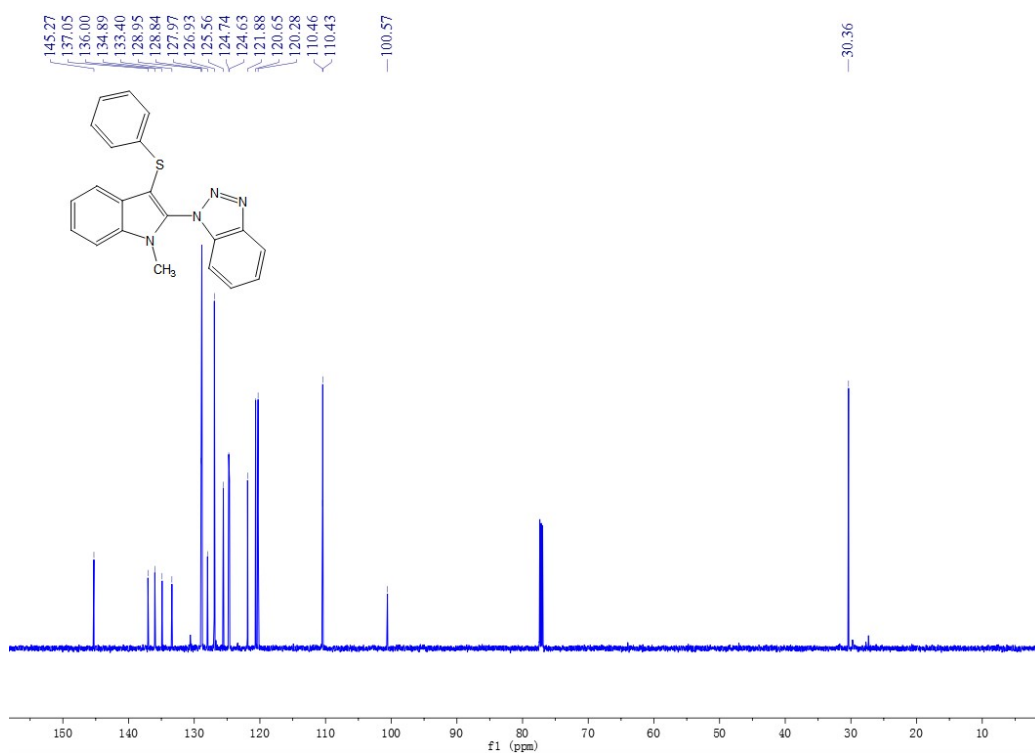

(124)  $^1\text{H}$ -NMR (600 MHz,  $\text{CDCl}_3$ ) spectrum of 61

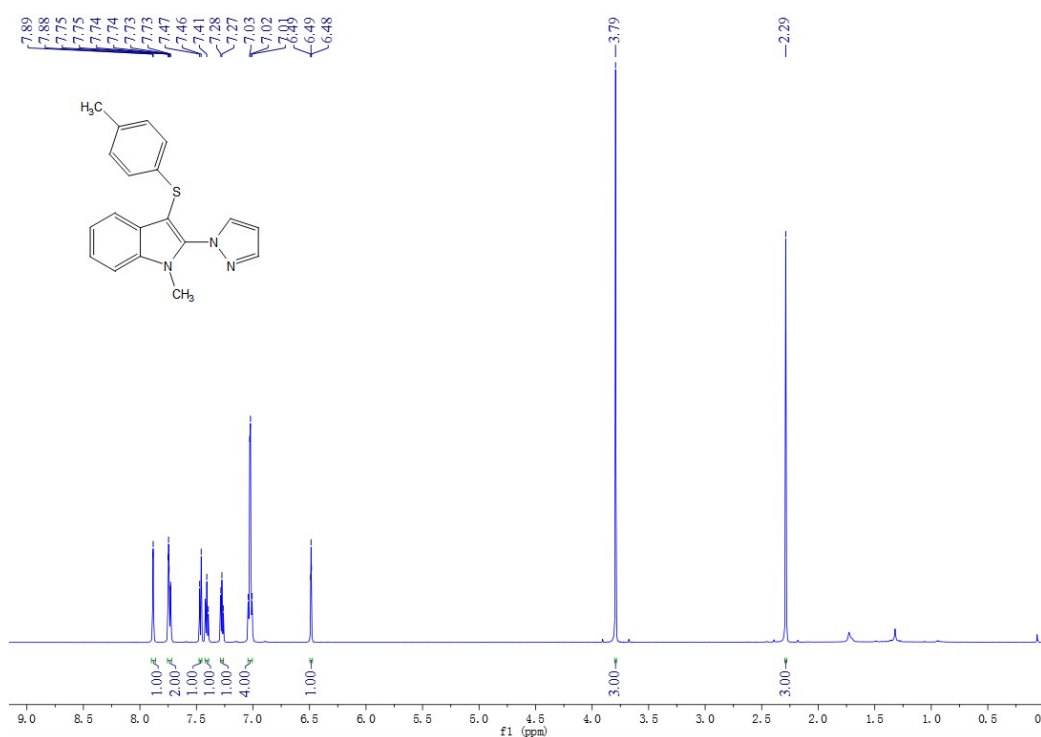



(125)  $^{13}\text{C}$ -NMR (151 MHz,  $\text{CDCl}_3$ ) spectrum of 61

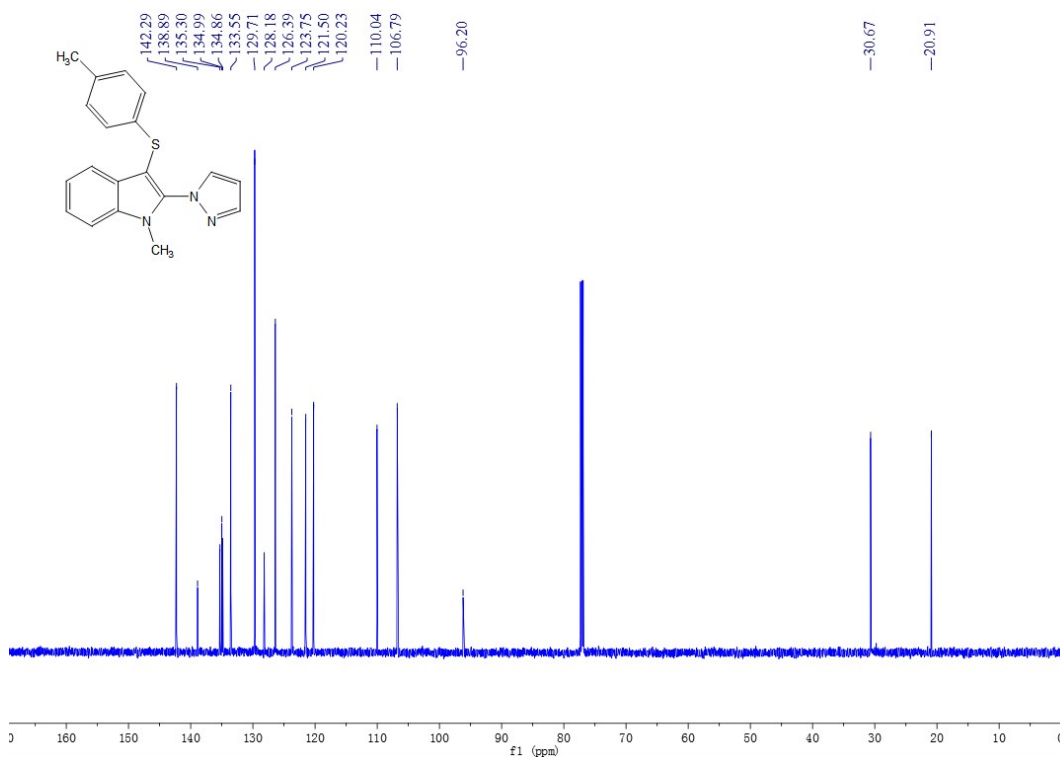

(126)  $^1\text{H}$ -NMR (600 MHz,  $\text{CDCl}_3$ ) spectrum of 62

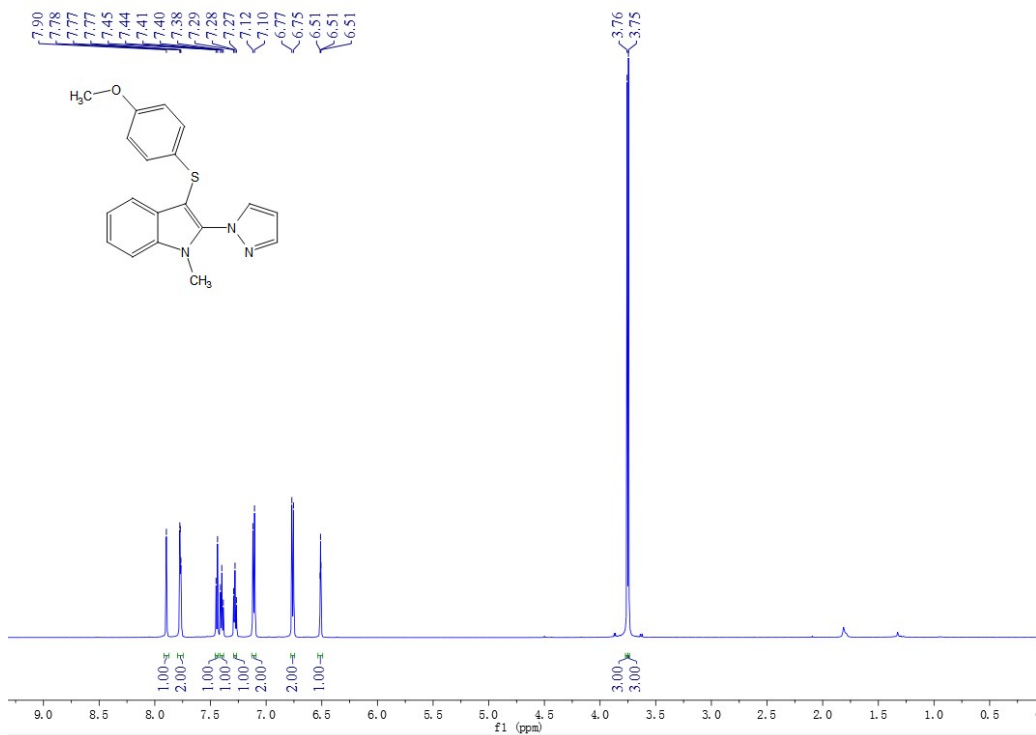

(127)  $^{13}\text{C}$ -NMR (151 MHz,  $\text{CDCl}_3$ ) spectrum of 62

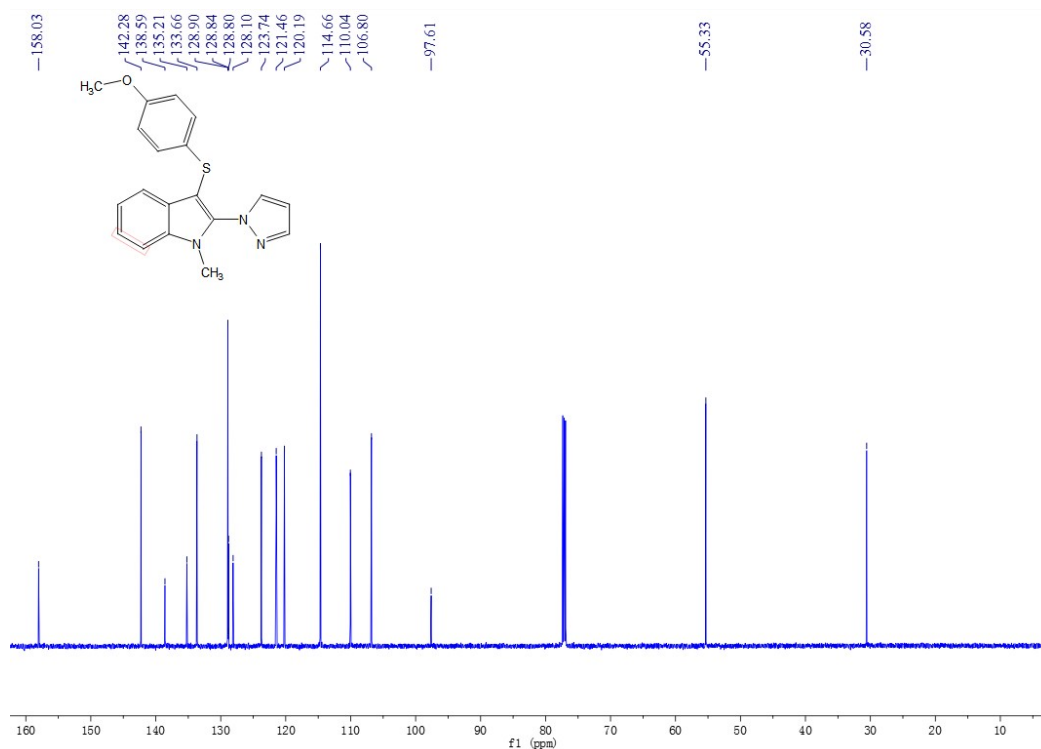

(128)  $^1\text{H}$ -NMR (600 MHz,  $\text{CDCl}_3$ ) spectrum of 63

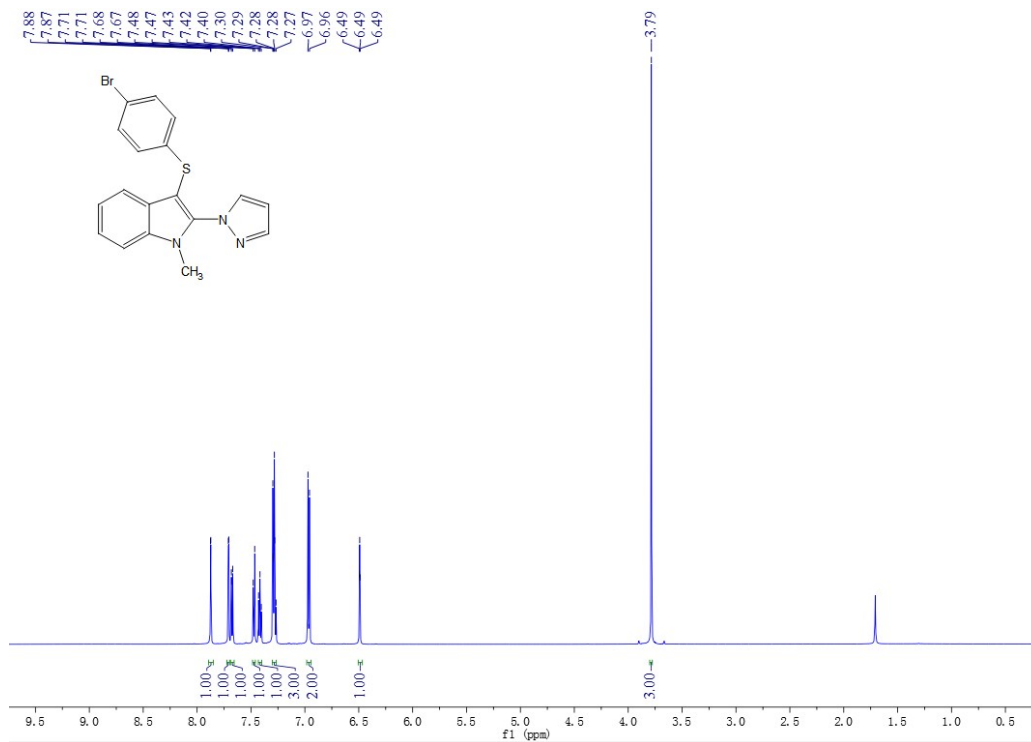

(129)  $^{13}\text{C}$ -NMR (151 MHz,  $\text{CDCl}_3$ ) spectrum of 63

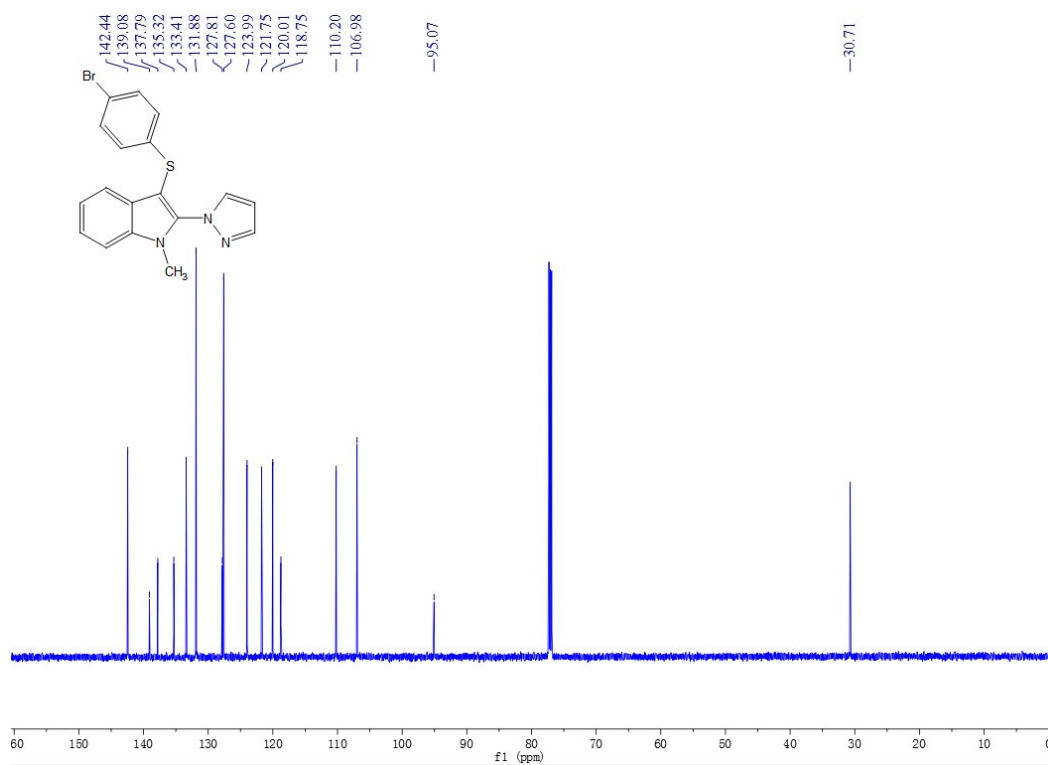

(130)  $^1\text{H}$ -NMR (600 MHz,  $\text{CDCl}_3$ ) spectrum of 64

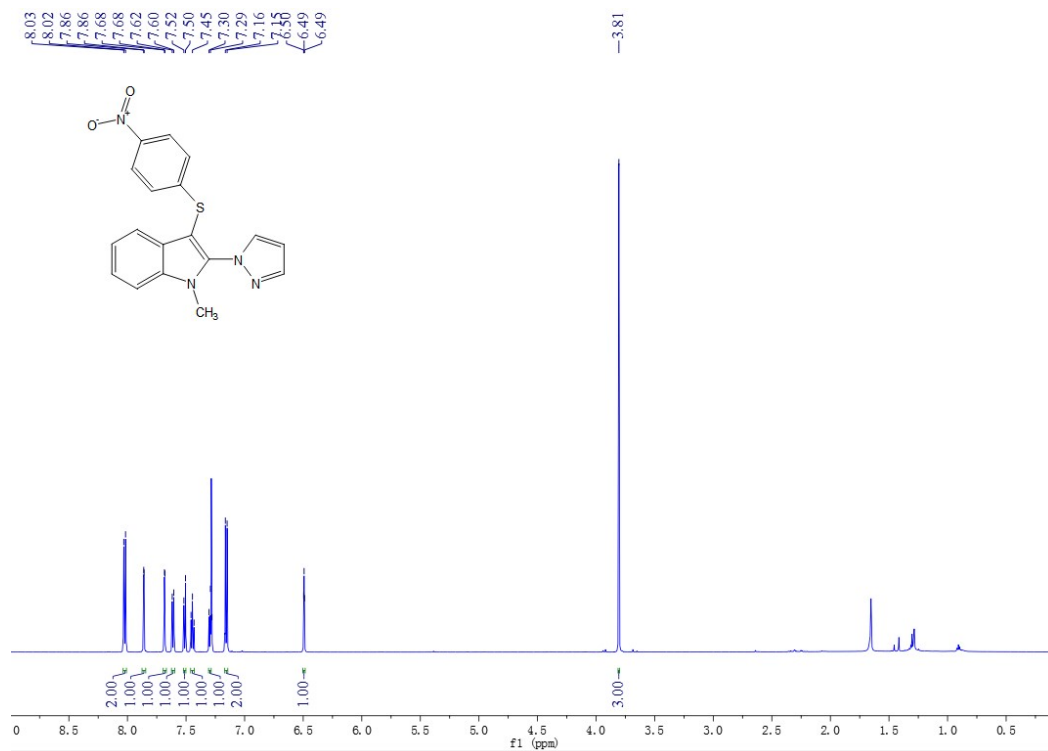

(131)  $^{13}\text{C}$ -NMR (151 MHz,  $\text{CDCl}_3$ ) spectrum of 64

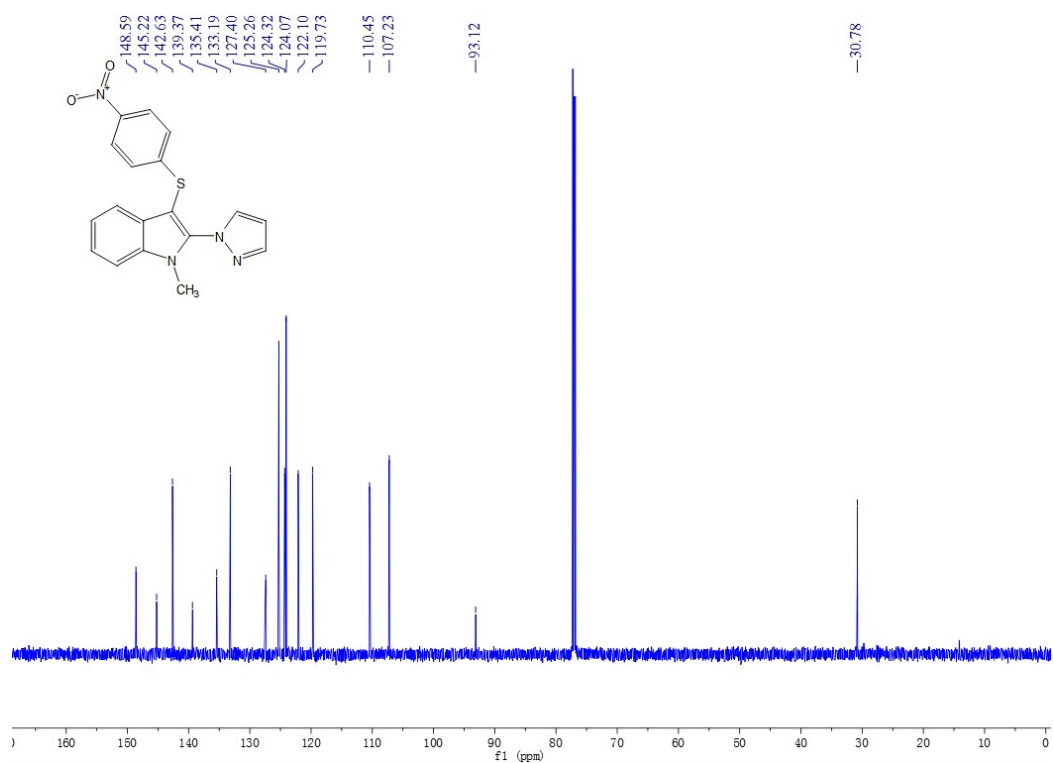

(132)  $^1\text{H}$ -NMR (600 MHz,  $\text{CDCl}_3$ ) spectrum of 65

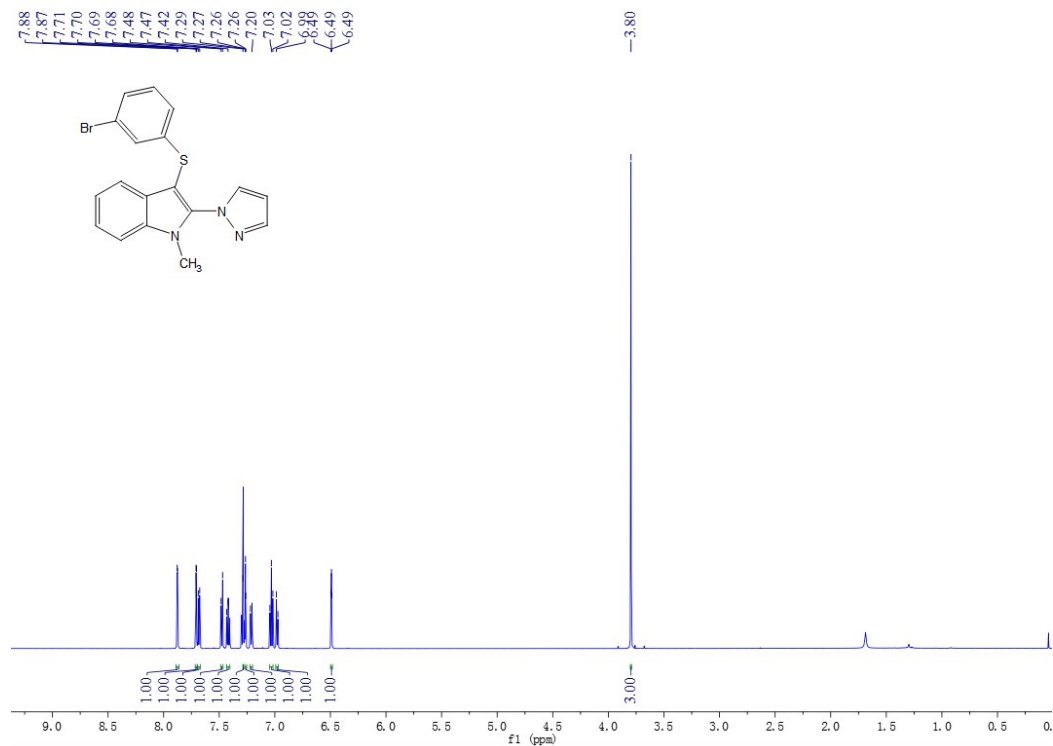

(133)  $^{13}\text{C}$ -NMR (151 MHz,  $\text{CDCl}_3$ ) spectrum of 65

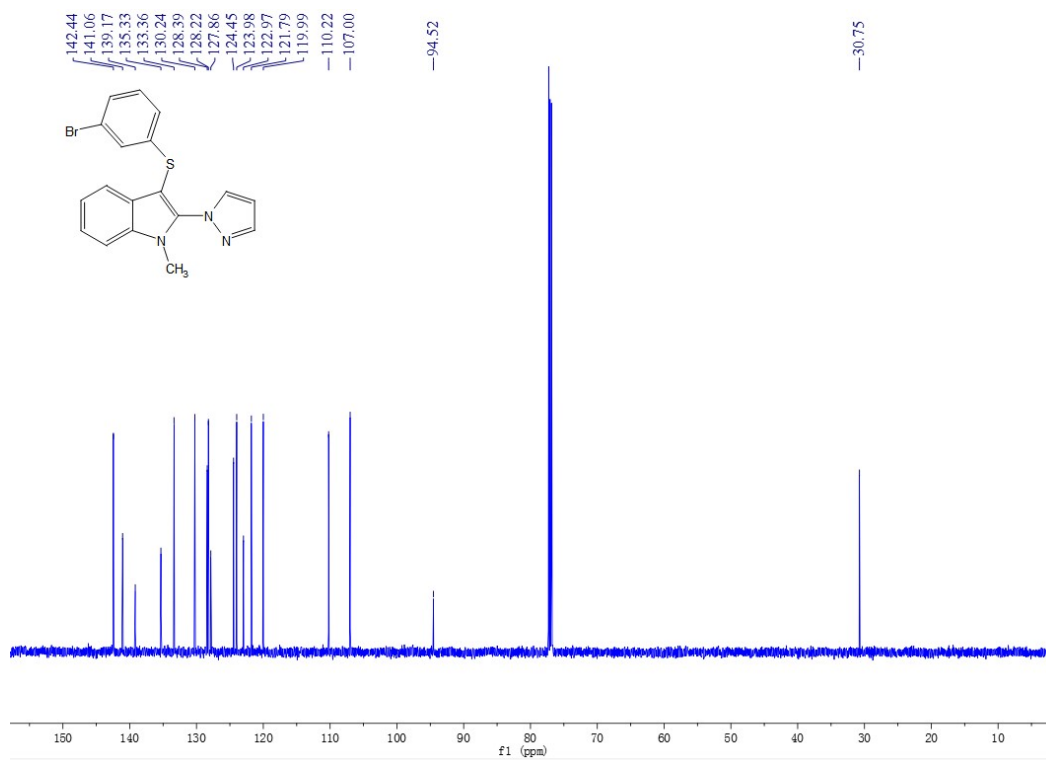

(134)  $^1\text{H}$ -NMR (600 MHz,  $\text{CDCl}_3$ ) spectrum of 66

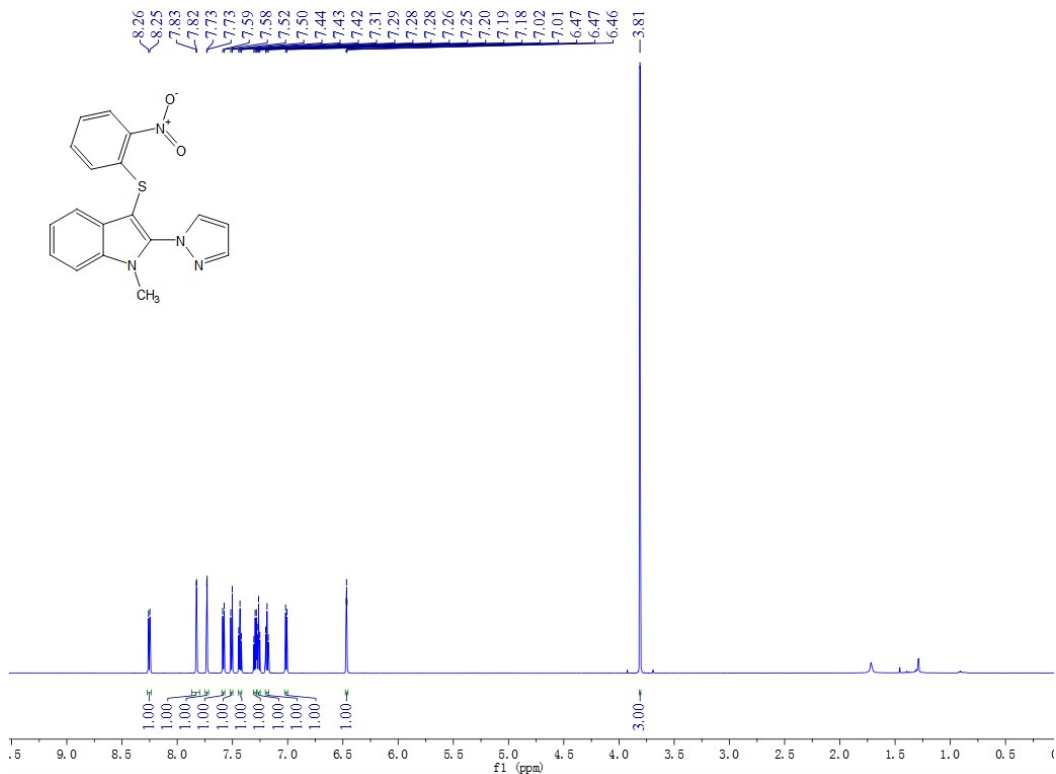

(135)  $^{13}\text{C}$ -NMR (151 MHz,  $\text{CDCl}_3$ ) spectrum of 66

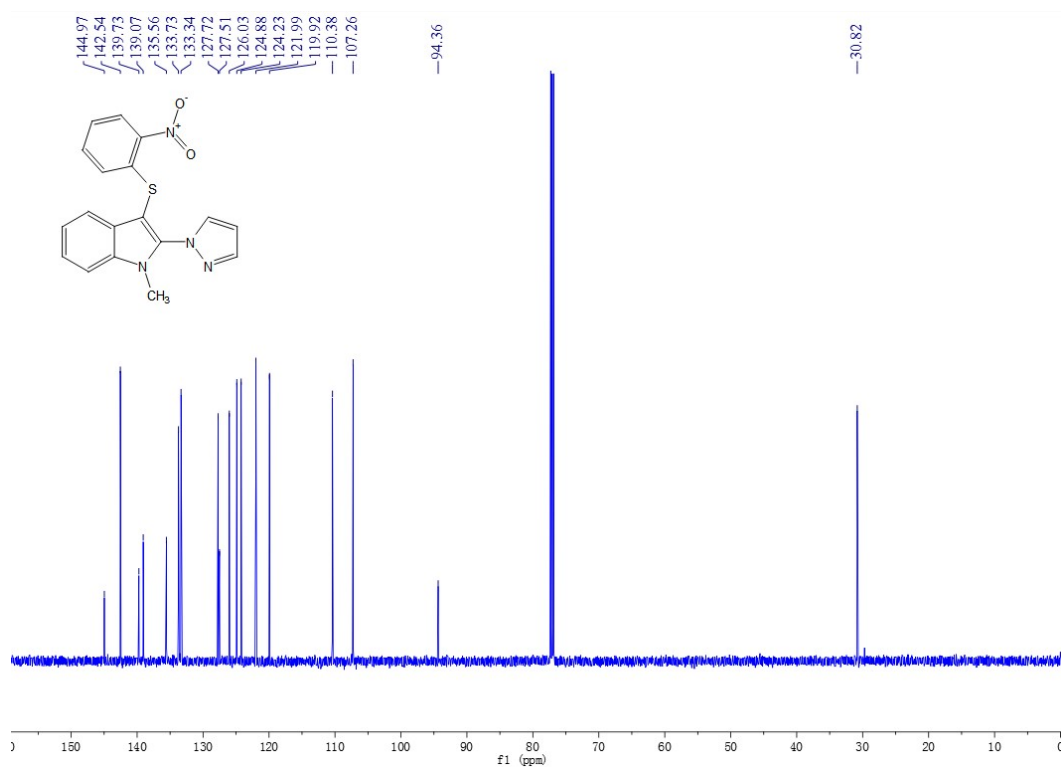

(136)  $^1\text{H}$ -NMR (600 MHz,  $\text{CDCl}_3$ ) spectrum of 67

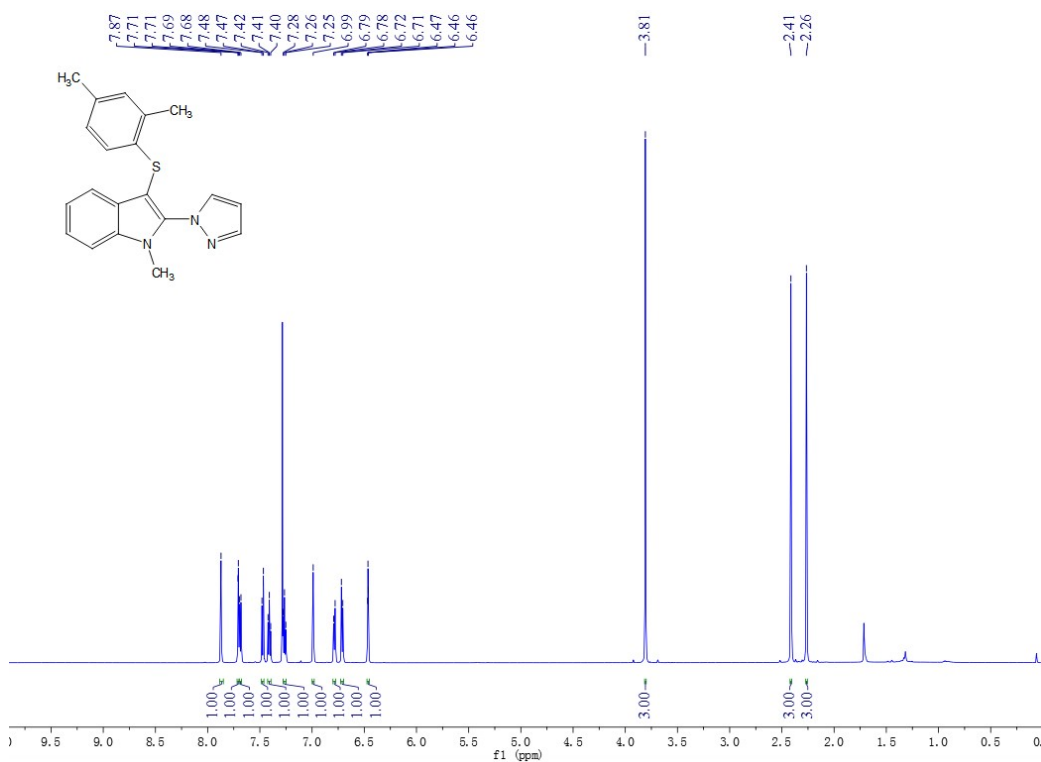

(137)  $^{13}\text{C}$ -NMR (151 MHz,  $\text{CDCl}_3$ ) spectrum of 67

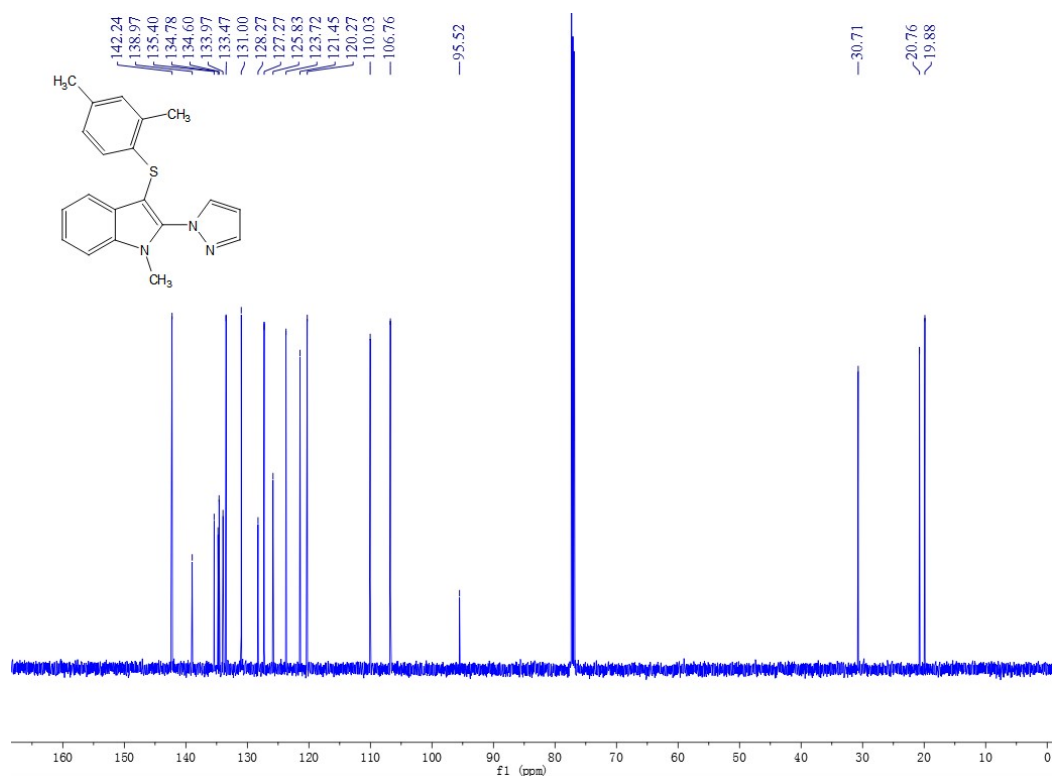

(138)  $^1\text{H}$ -NMR (600 MHz,  $\text{CDCl}_3$ ) spectrum of 68

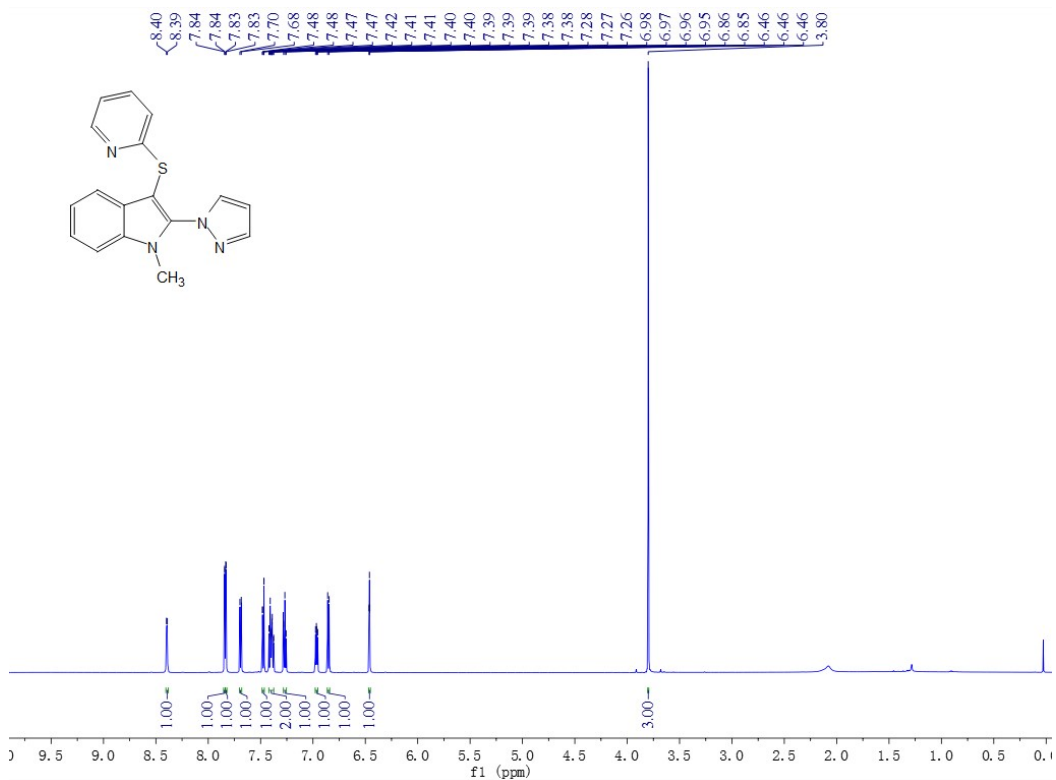

(139)  $^{13}\text{C}$ -NMR (151 MHz,  $\text{CDCl}_3$ ) spectrum of 68

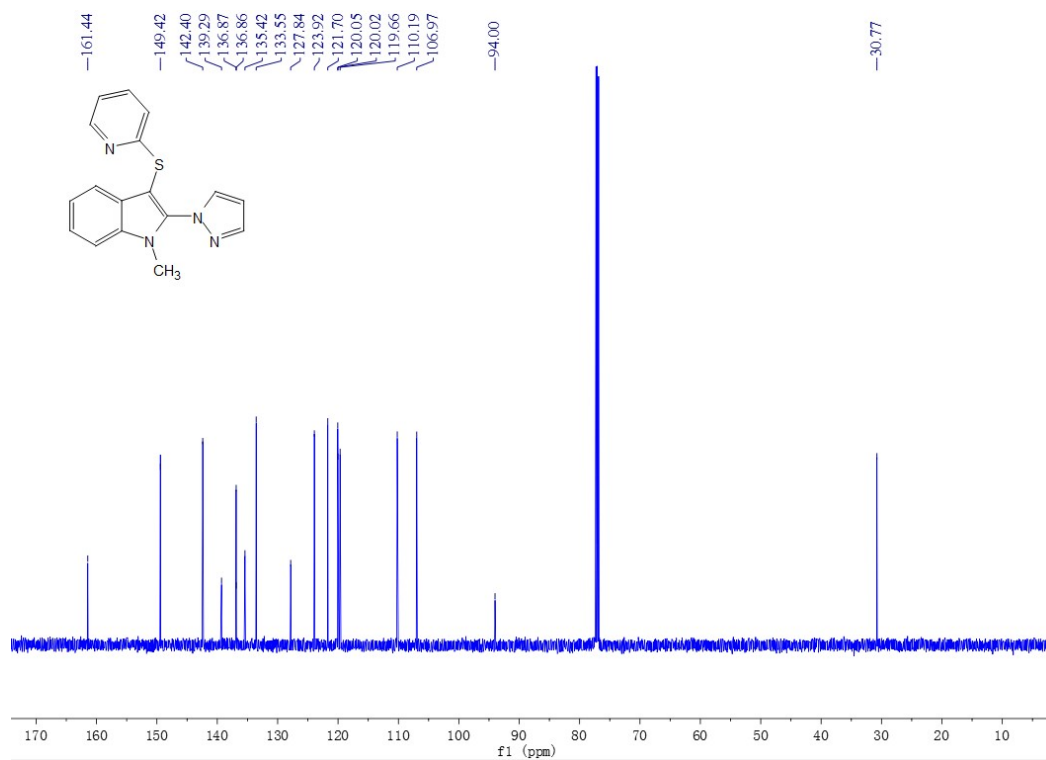

(140)  $^1\text{H}$ -NMR (600 MHz,  $\text{CDCl}_3$ ) spectrum of 69

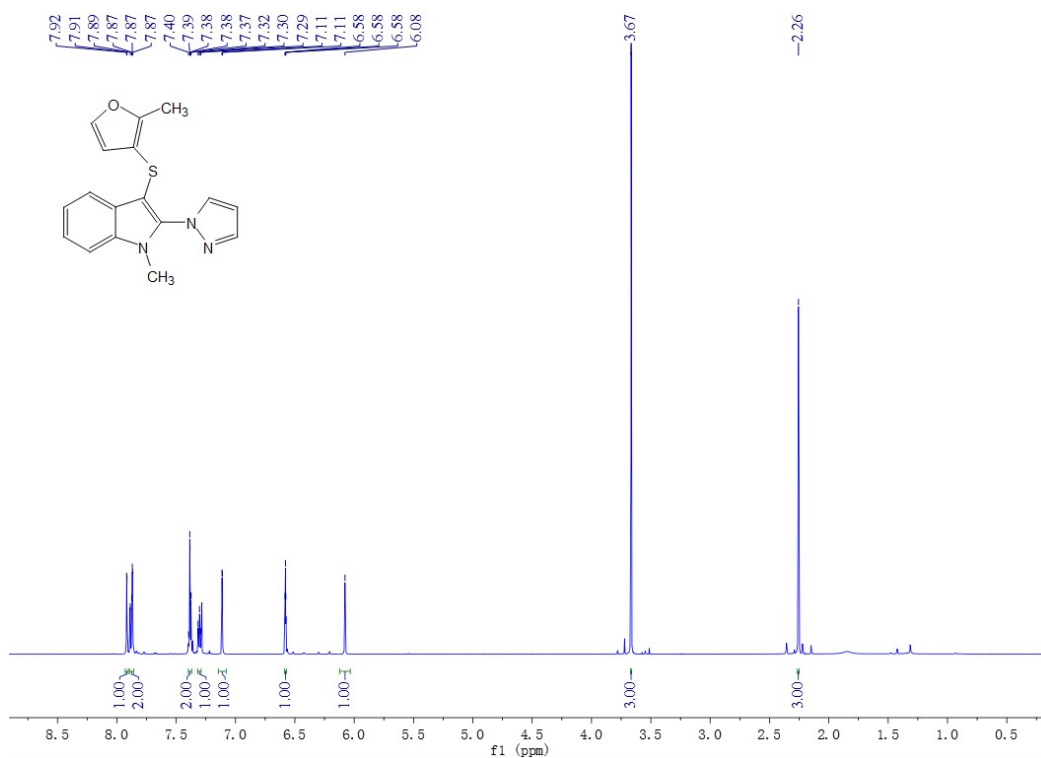



(141)  $^{13}\text{C}$ -NMR (151 MHz,  $\text{CDCl}_3$ ) spectrum of 69

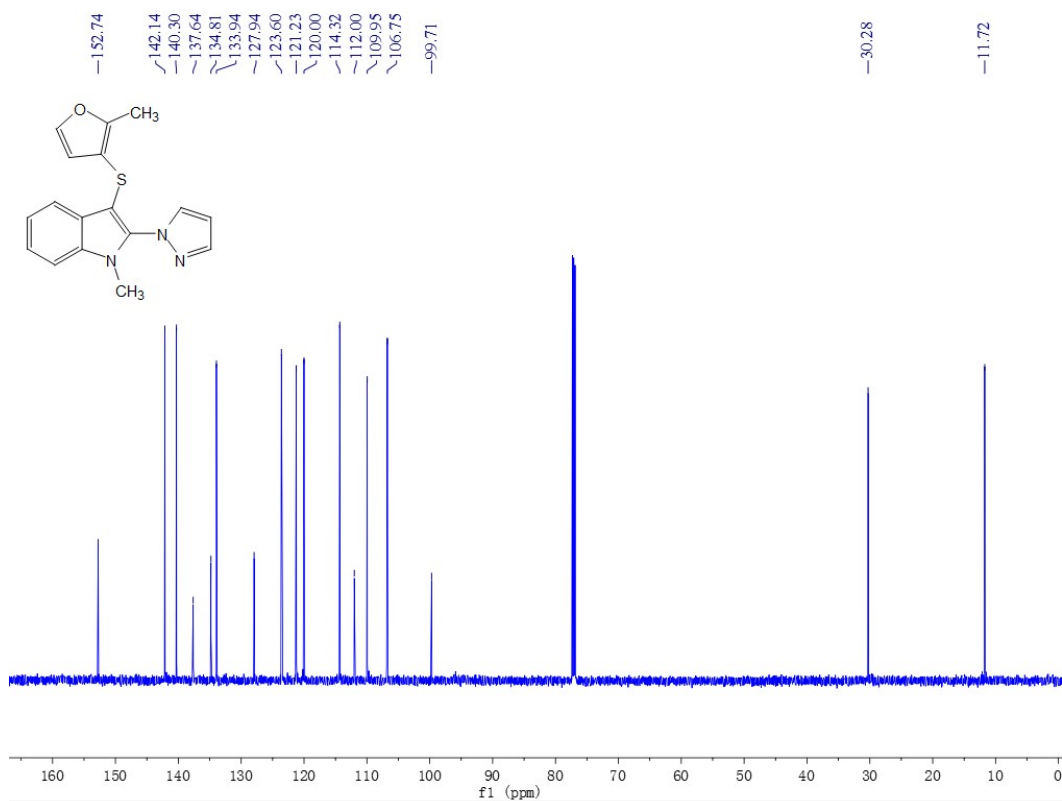

(142)  $^1\text{H}$ -NMR (600 MHz,  $\text{CDCl}_3$ ) spectrum of 70

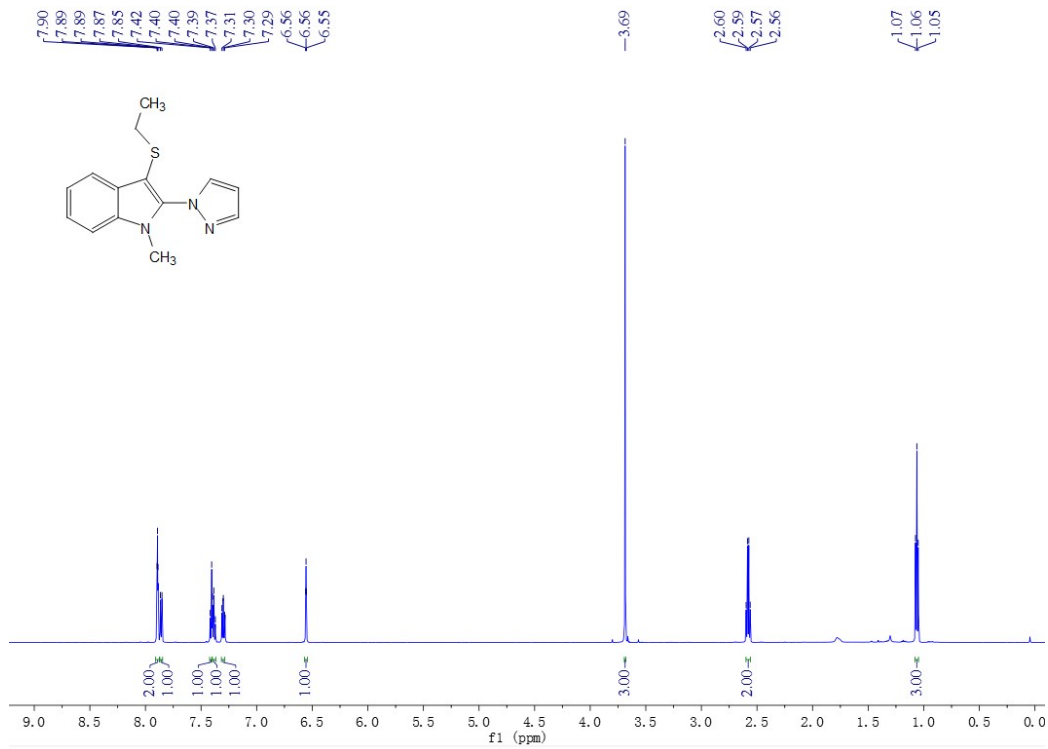

(143)  $^{13}\text{C}$ -NMR (151 MHz,  $\text{CDCl}_3$ ) spectrum of 70

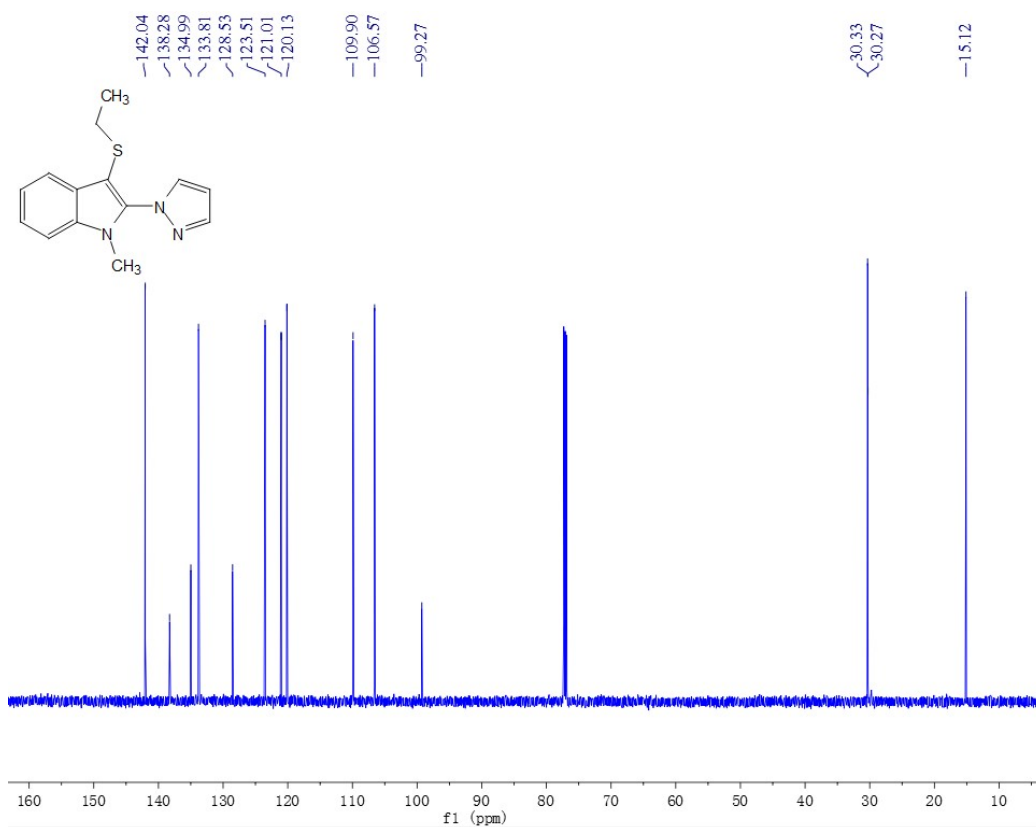

(144)  $^1\text{H}$ -NMR (600 MHz,  $\text{CDCl}_3$ ) spectrum of 71

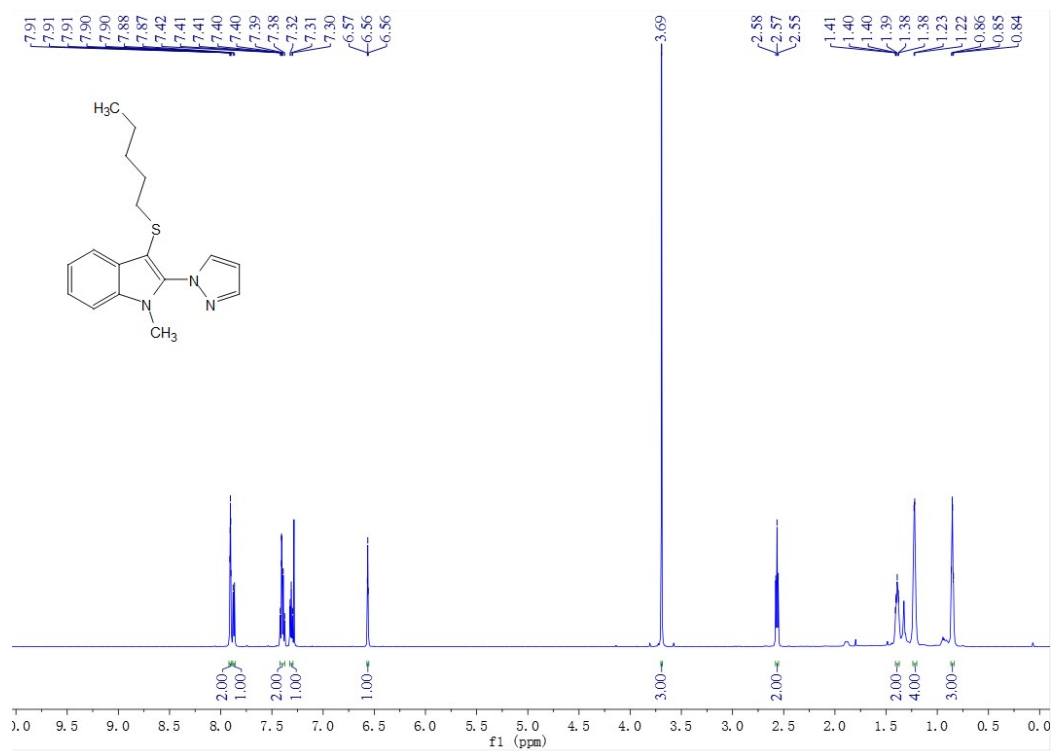

(145) <sup>13</sup>C-NMR (151 MHz, CDCl<sub>3</sub>) spectrum of 71

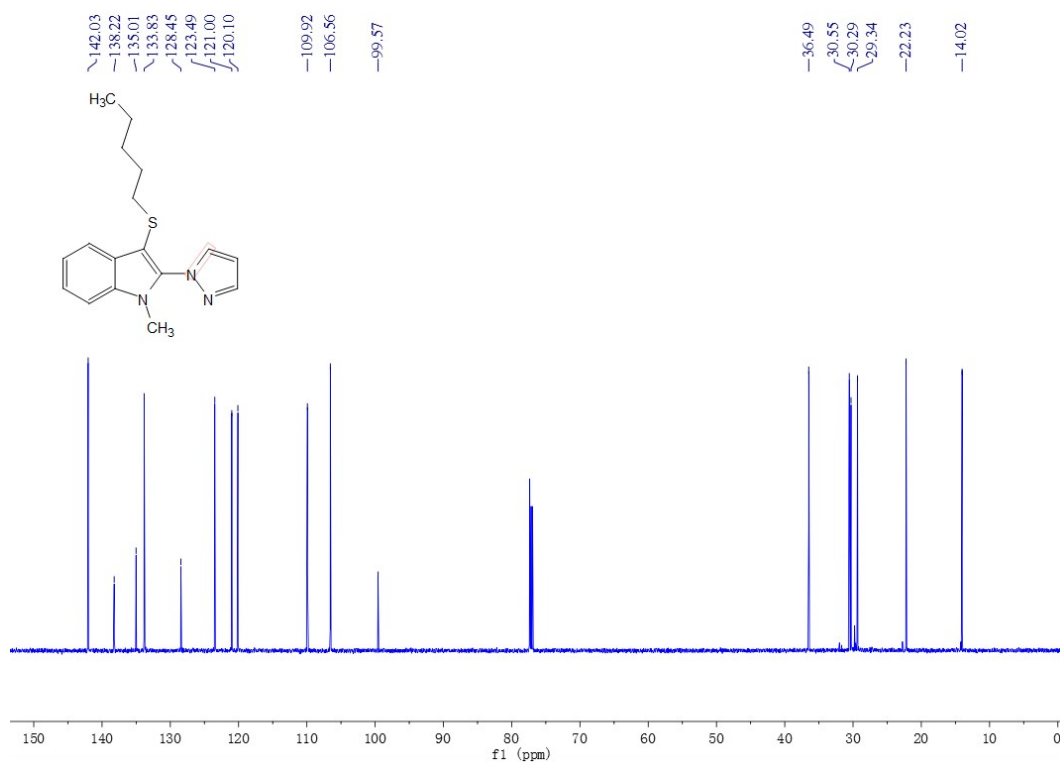

(146) <sup>1</sup>H-NMR (600 MHz, CDCl<sub>3</sub>) spectrum of 72

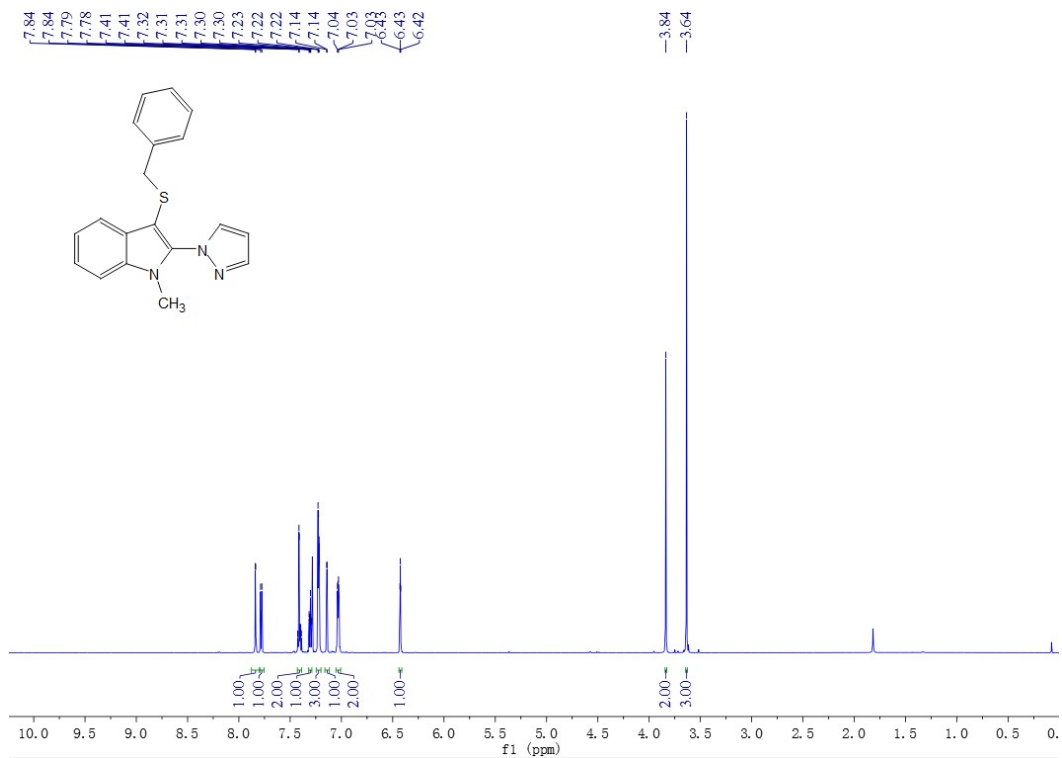

(147)  $^{13}\text{C}$ -NMR (151 MHz,  $\text{CDCl}_3$ ) spectrum of 72

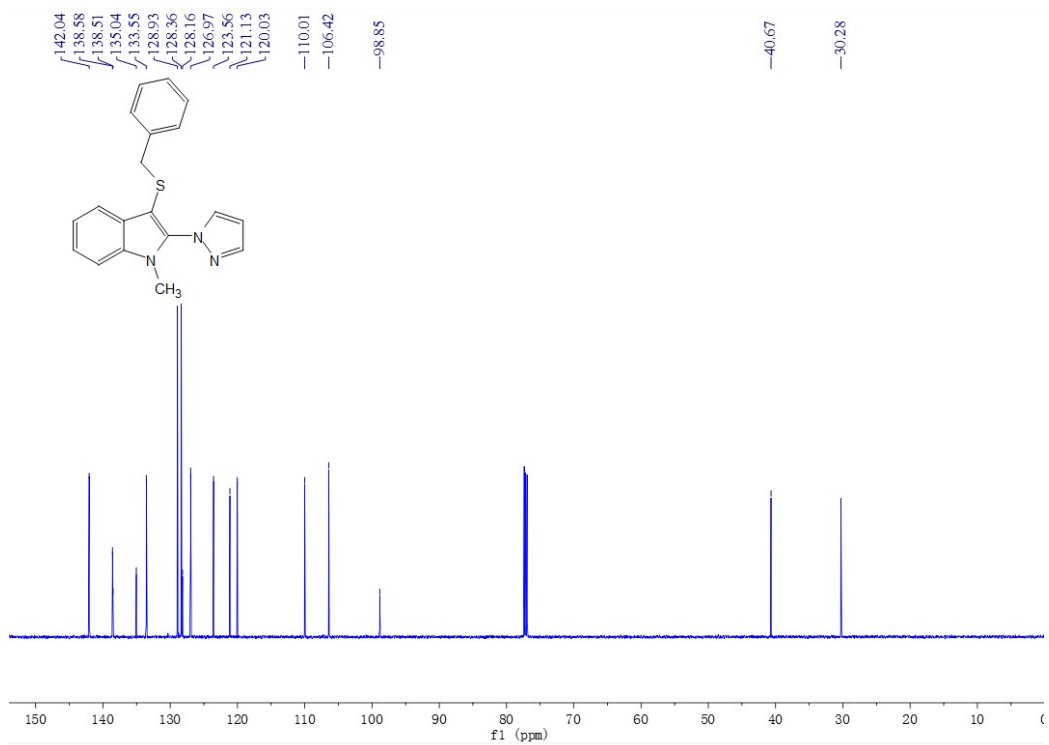

(148)  $^1\text{H}$ -NMR (600 MHz,  $\text{CDCl}_3$ ) spectrum of 73

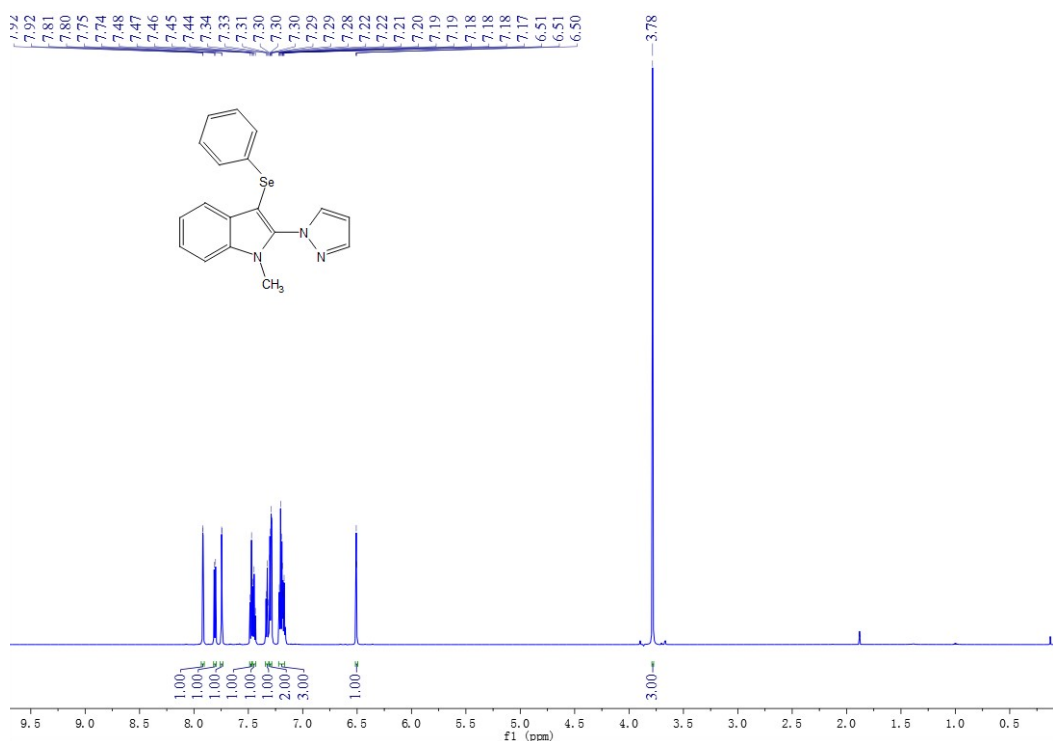

(149)  $^{13}\text{C}$ -NMR (151 MHz,  $\text{CDCl}_3$ ) spectrum of 73

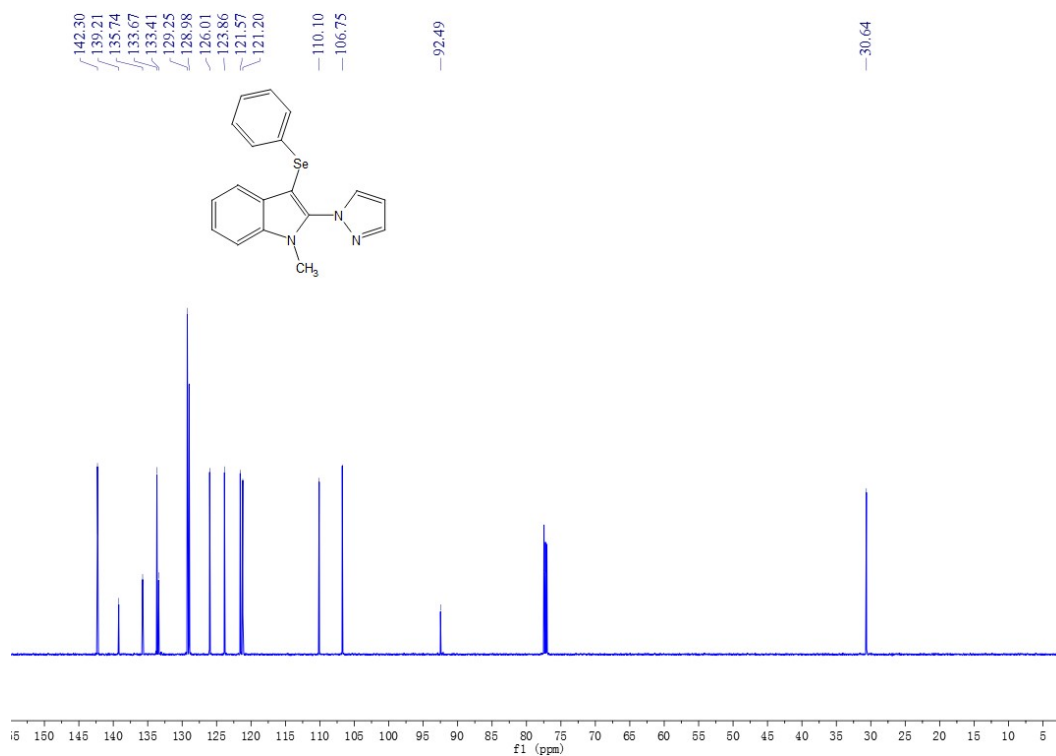

(150)  $^1\text{H}$ -NMR (600 MHz,  $\text{CDCl}_3$ ) spectrum of 74

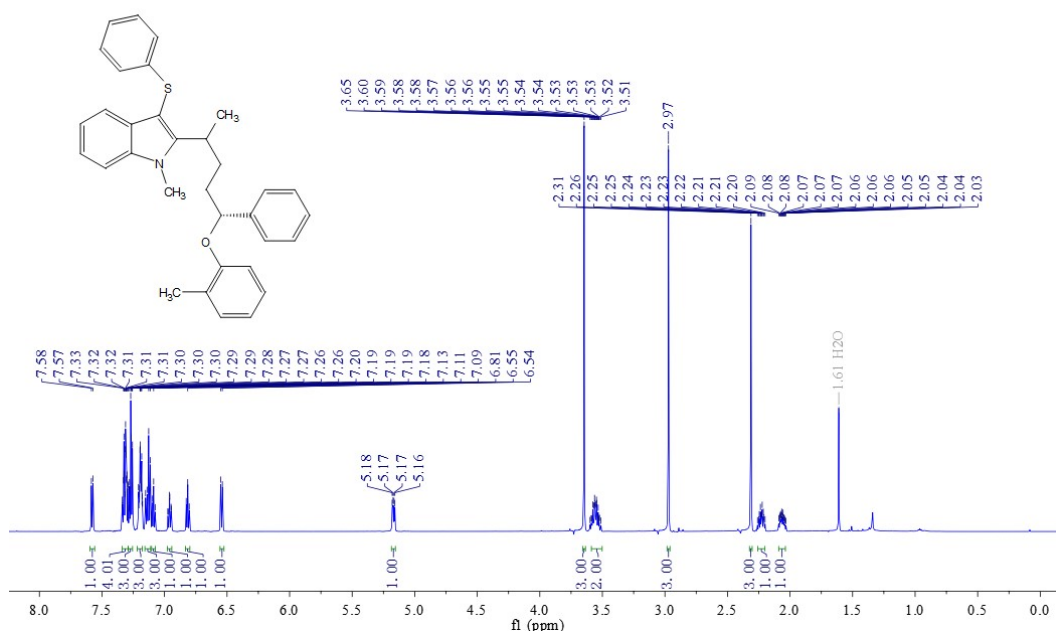

(151)  $^{13}\text{C}$ -NMR (151 MHz,  $\text{CDCl}_3$ ) spectrum of 74

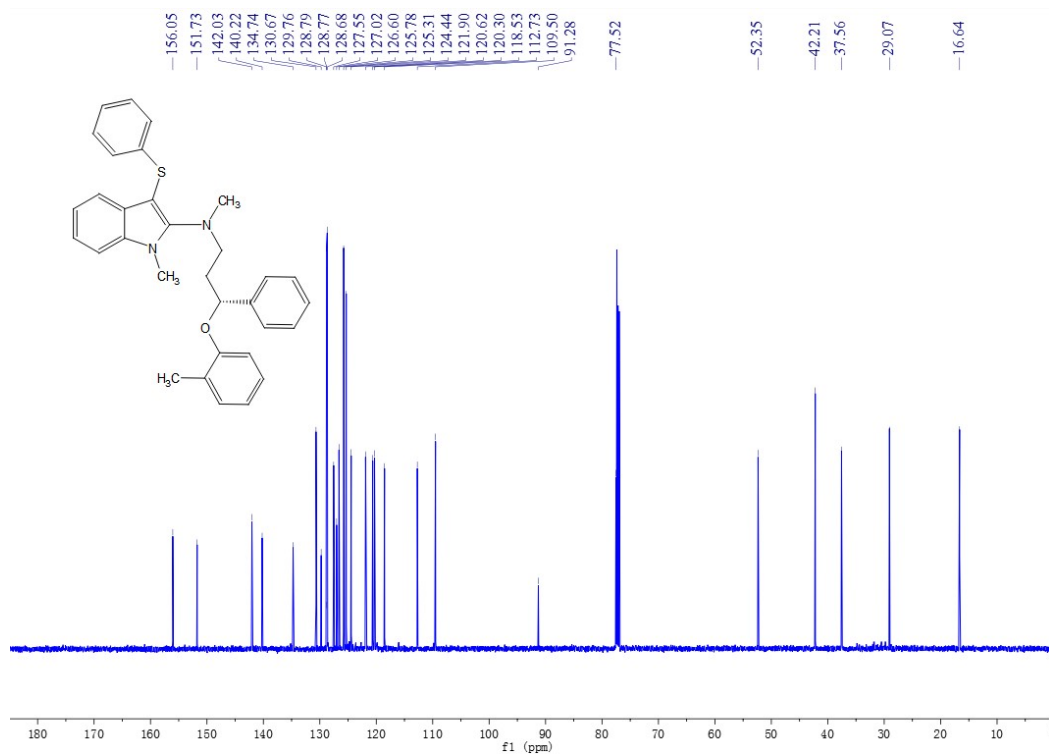

(152)  $^1\text{H}$ -NMR (600 MHz,  $\text{CDCl}_3$ ) spectrum of 75

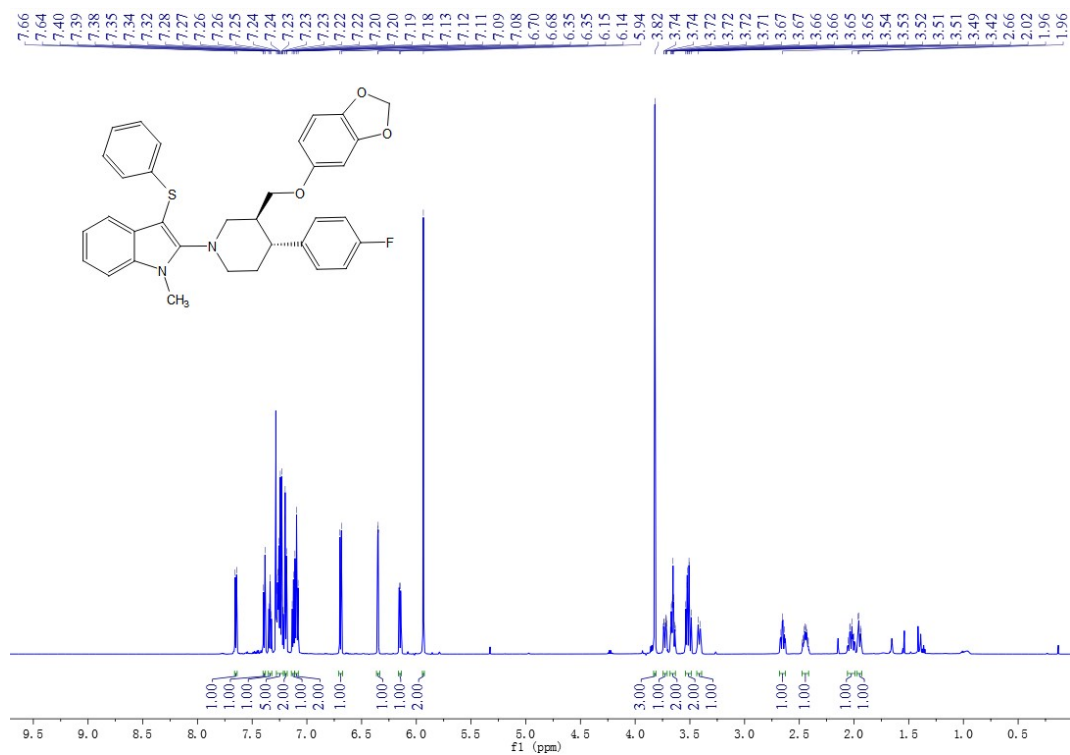

(153)  $^{13}\text{C}$ -NMR (151 MHz,  $\text{CDCl}_3$ ) spectrum of 75

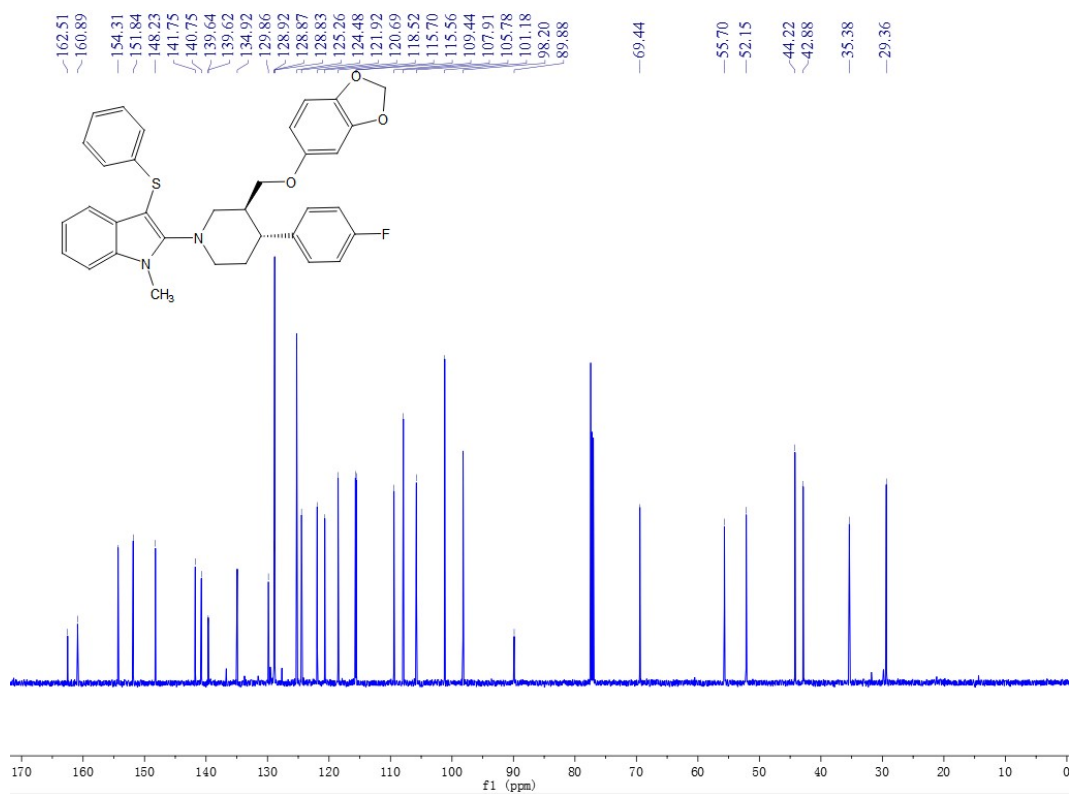

(154)  $^{19}\text{F}$ -NMR (565 MHz,  $\text{CDCl}_3$ ) spectrum of 75

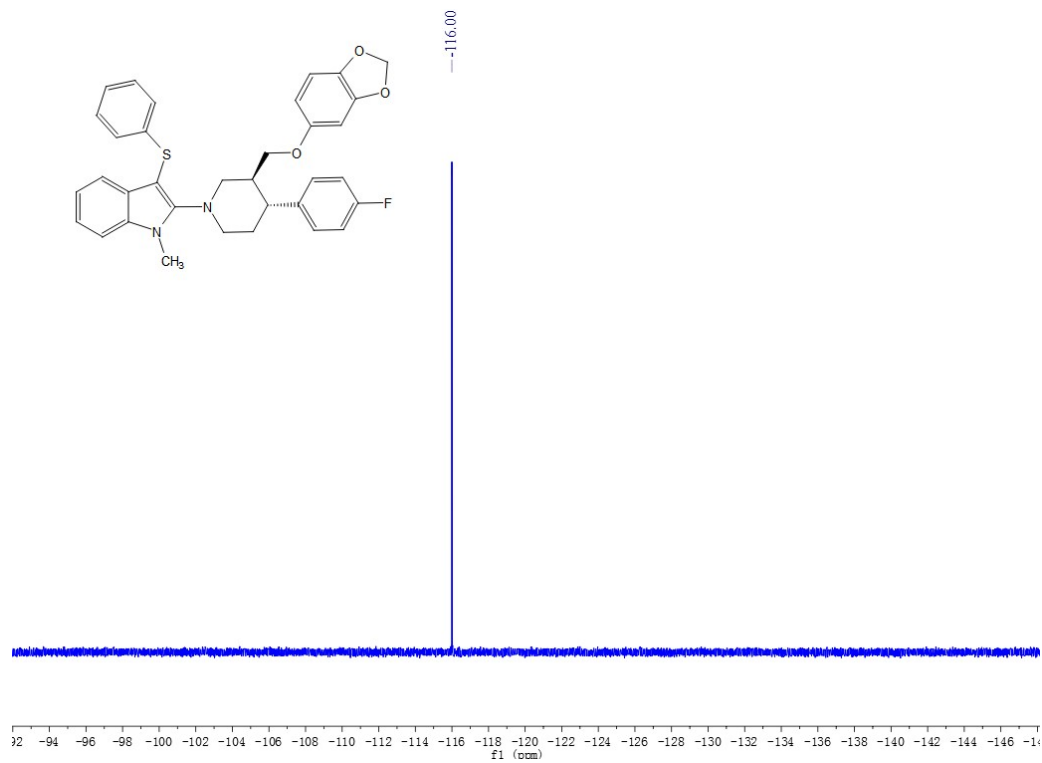





(157) <sup>1</sup>H-NMR (600 MHz, CDCl<sub>3</sub>) spectrum of 77

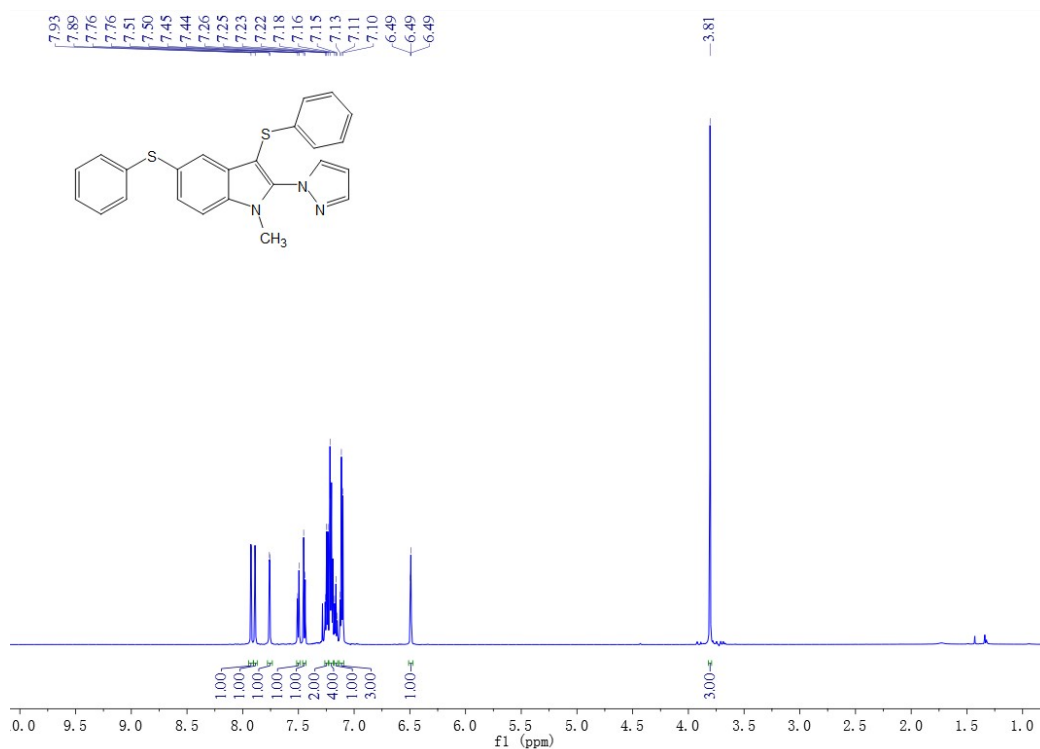

(158) <sup>13</sup>C-NMR (151 MHz, CDCl<sub>3</sub>) spectrum of 77

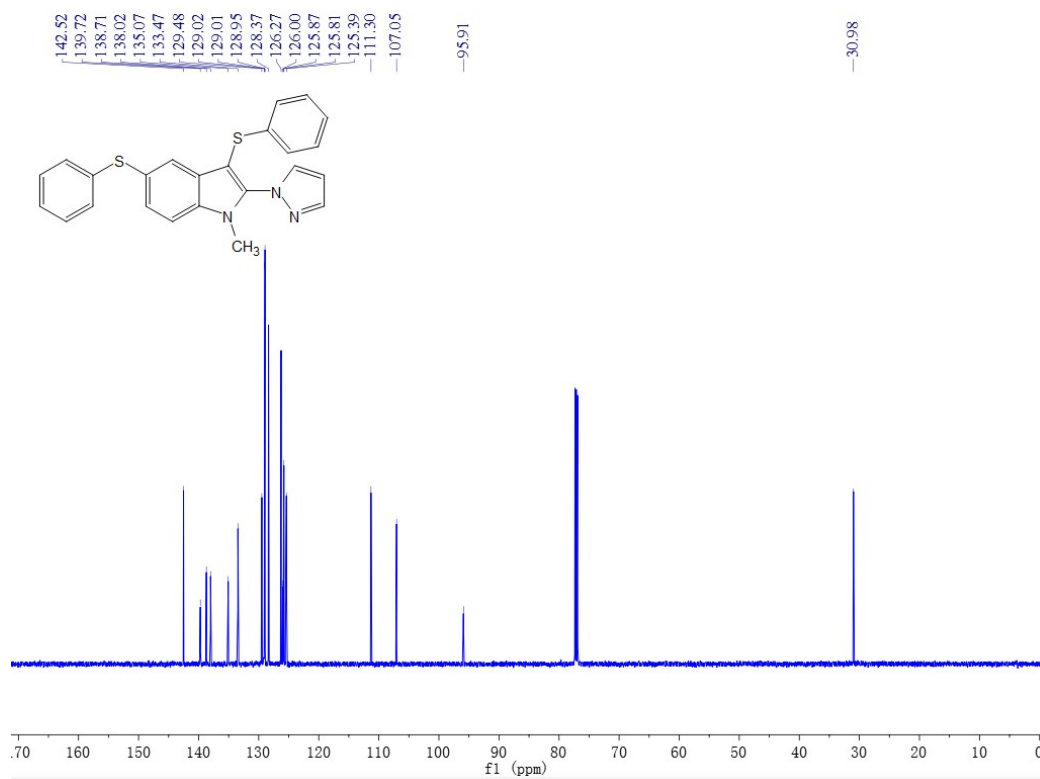

(159)  $^1\text{H-NMR}$  (600 MHz,  $\text{CDCl}_3$ ) spectrum of 78

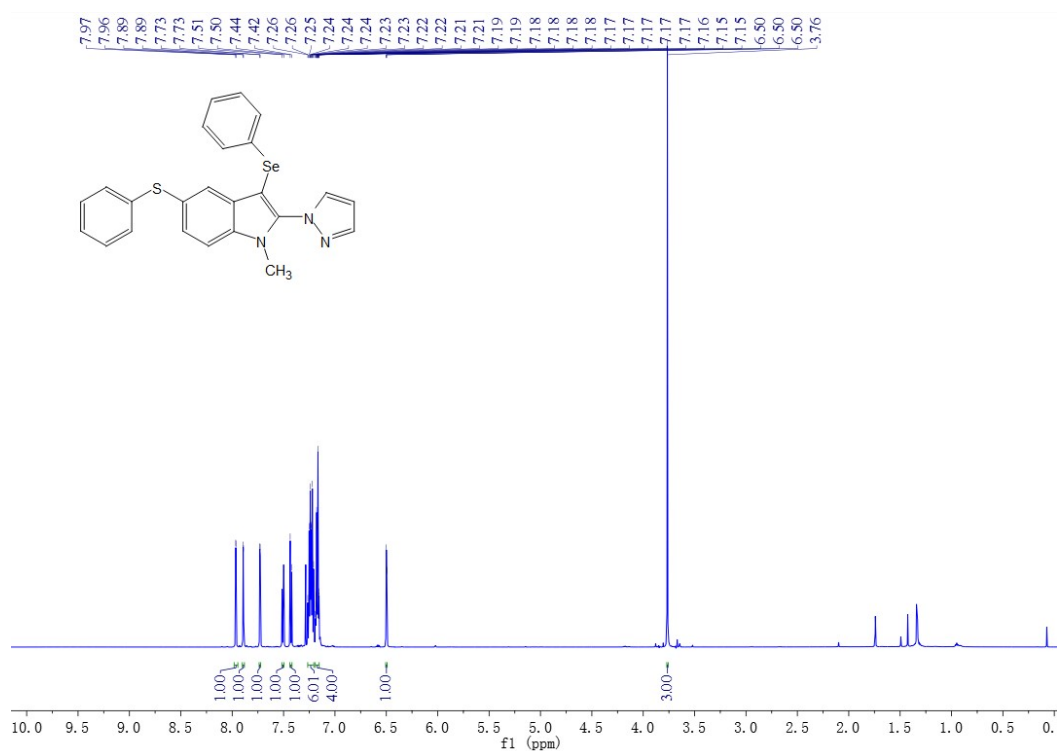

(160)  $^{13}\text{C-NMR}$  (151 MHz,  $\text{CDCl}_3$ ) spectrum of 78

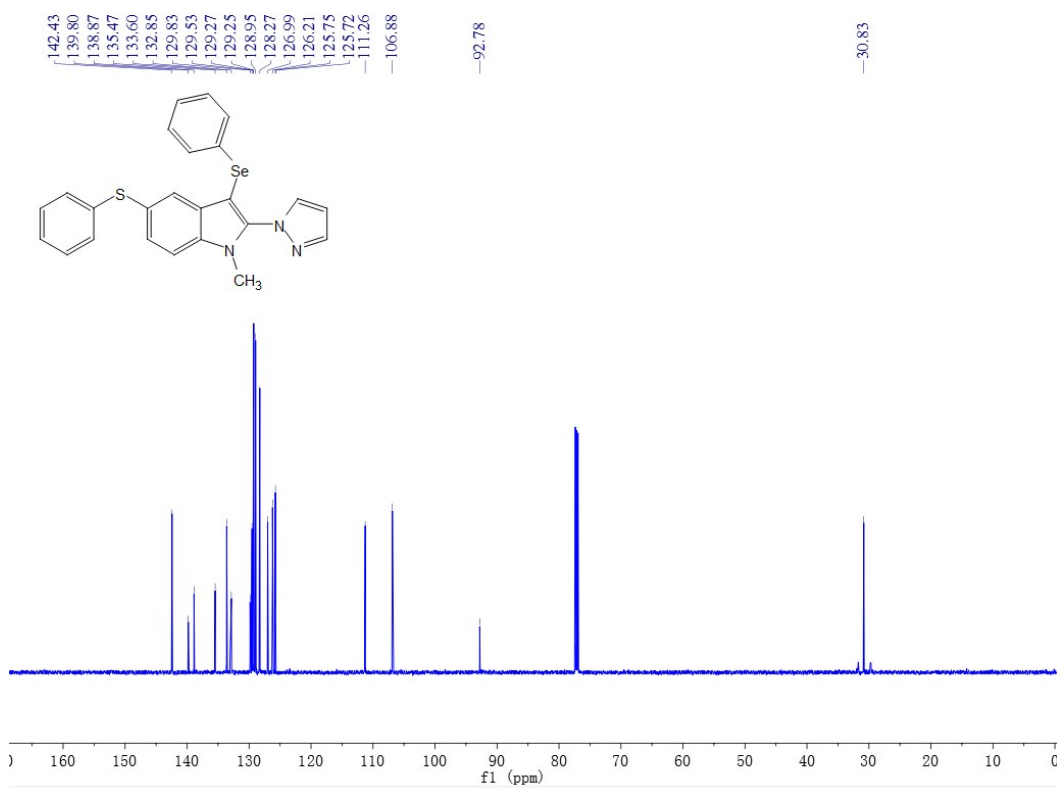

(161) <sup>1</sup>H-NMR (600 MHz, CDCl<sub>3</sub>) spectrum of 79

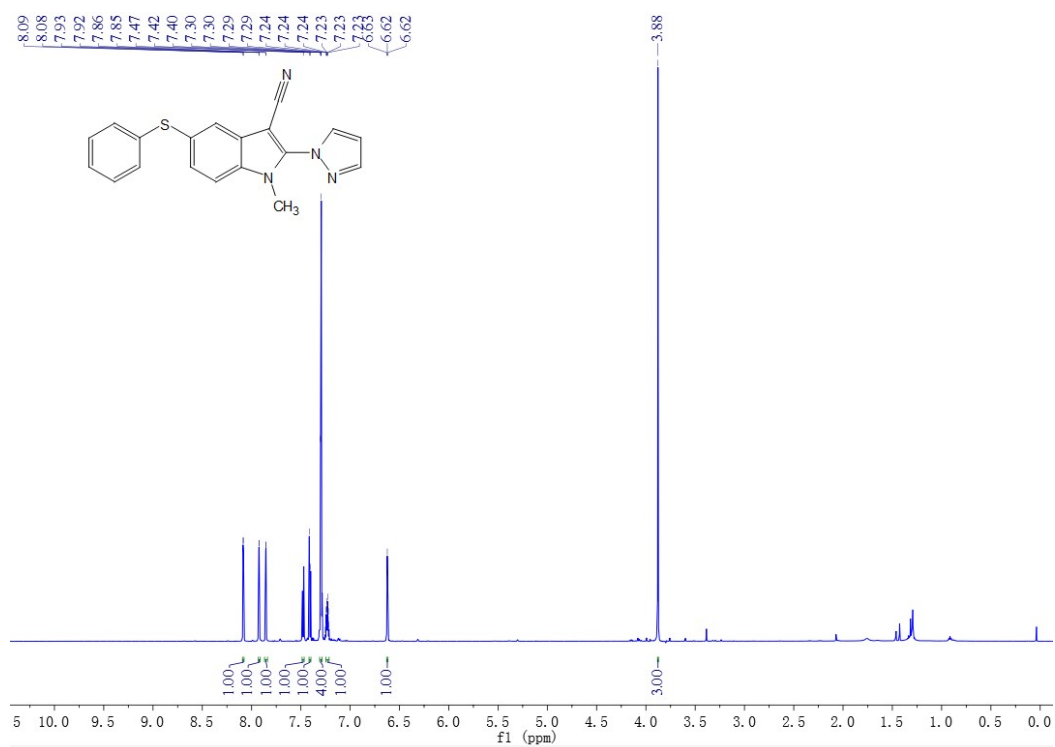

(162) <sup>13</sup>C-NMR (151 MHz, CDCl<sub>3</sub>) spectrum of 79

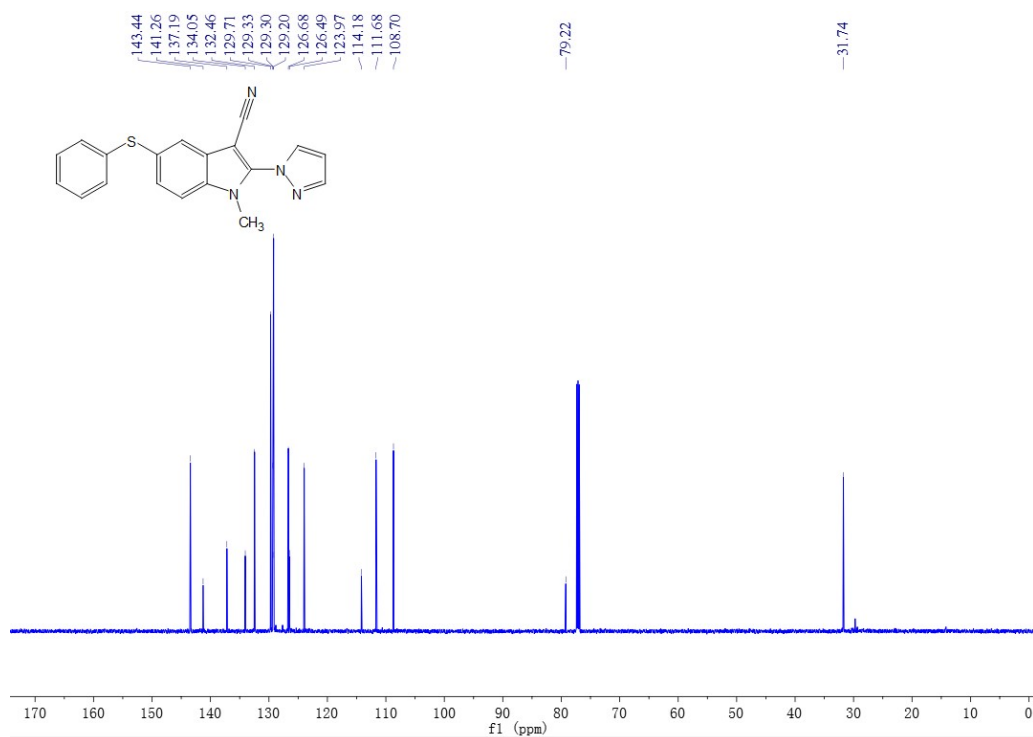

(163) <sup>1</sup>H-NMR (600 MHz, CDCl<sub>3</sub>) spectrum of 80

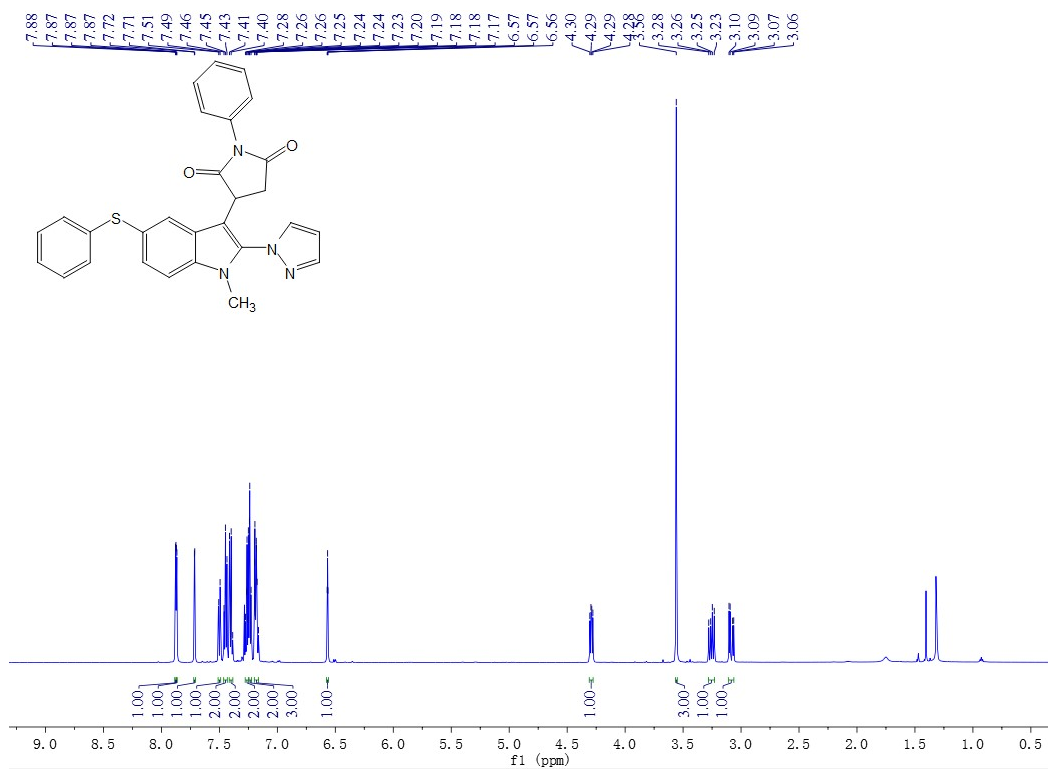

(164) <sup>13</sup>C-NMR (151 MHz, CDCl<sub>3</sub>) spectrum of 80

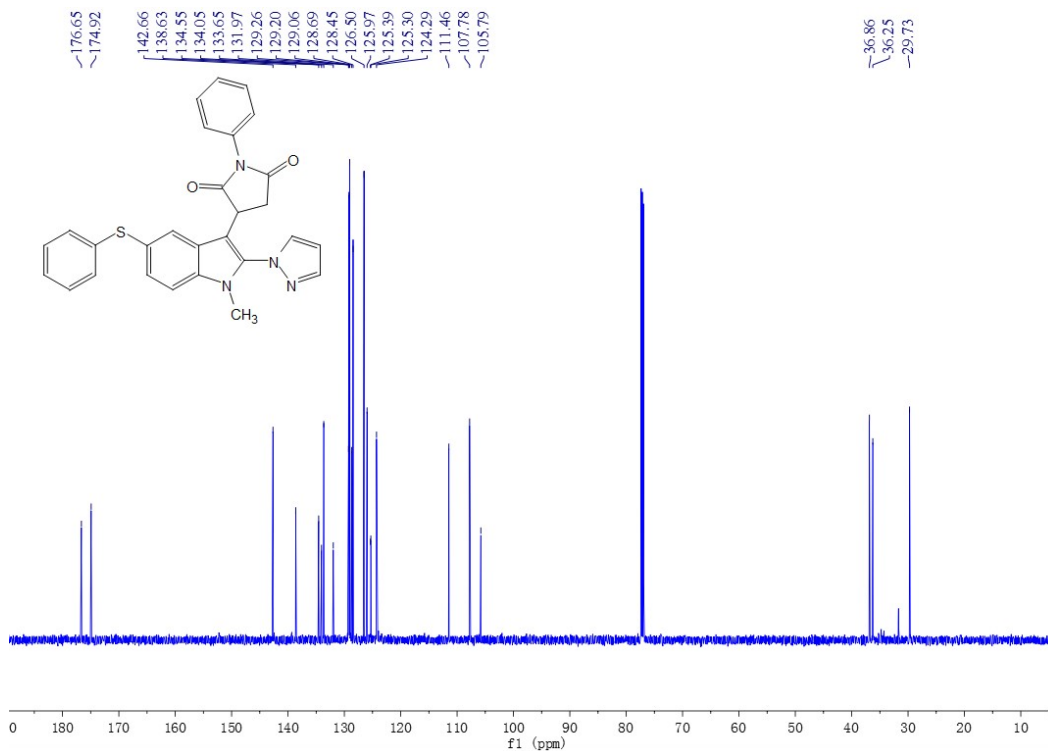

(165)  $^1\text{H-NMR}$  (600 MHz,  $\text{CDCl}_3$ ) spectrum of 81

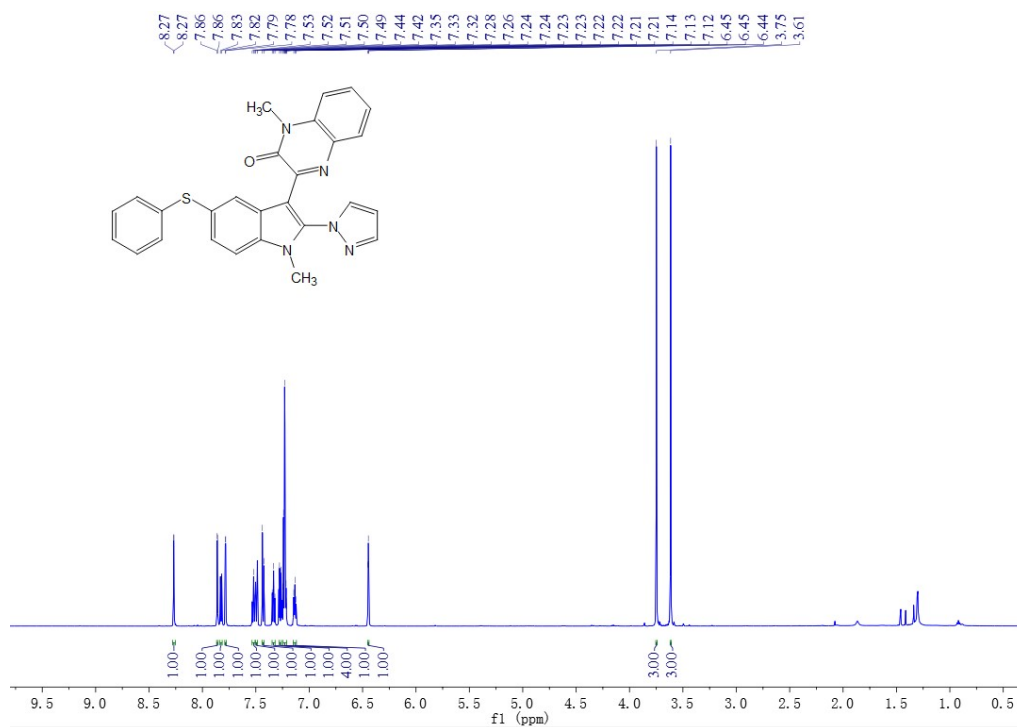

(166)  $^{13}\text{C-NMR}$  (151 MHz,  $\text{CDCl}_3$ ) spectrum of 81

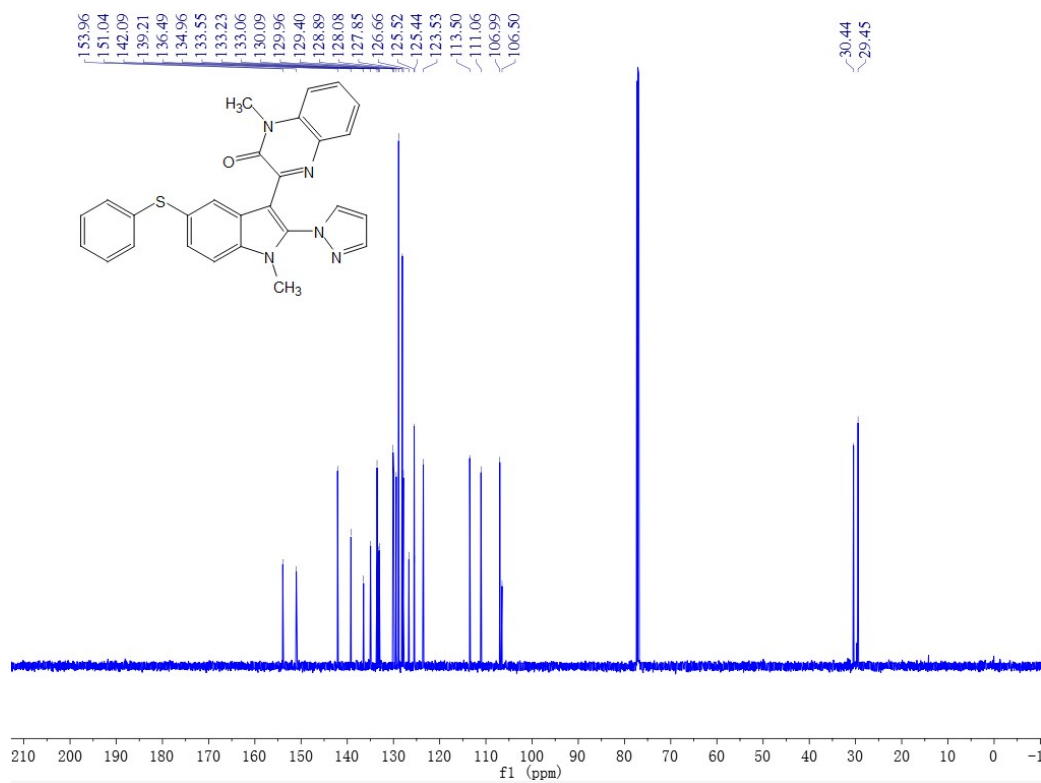

(167) <sup>1</sup>H-NMR (600 MHz, CDCl<sub>3</sub>) spectrum of 82

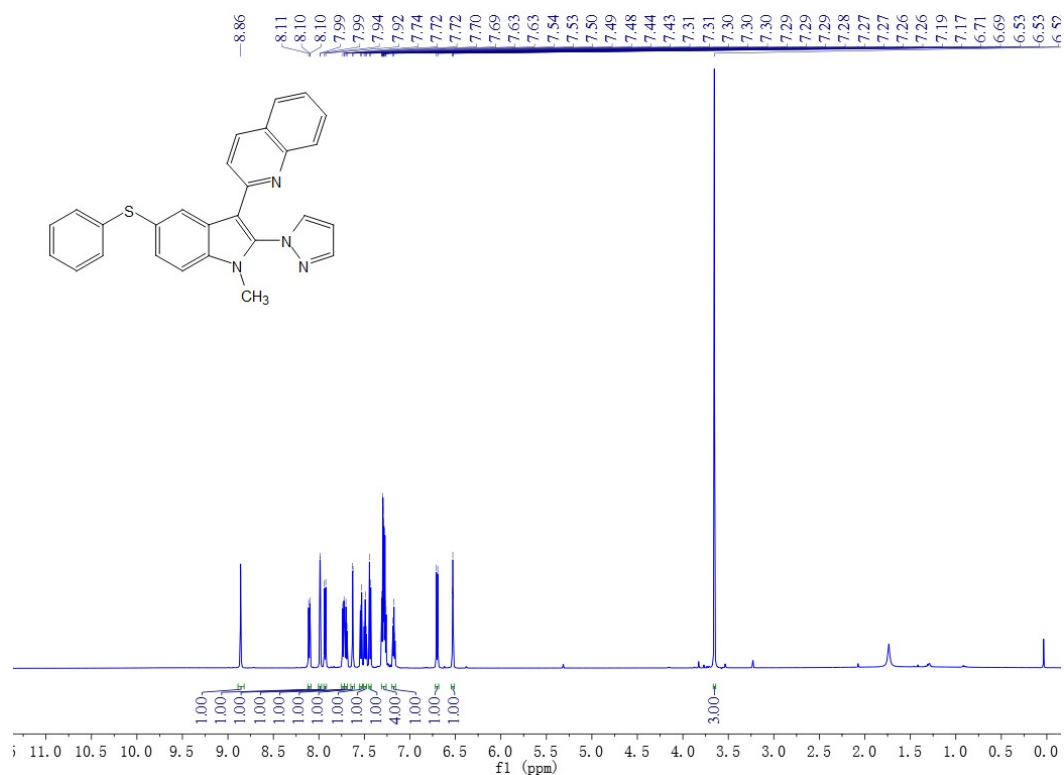

(168) <sup>13</sup>C-NMR (151 MHz, CDCl<sub>3</sub>) spectrum of 82

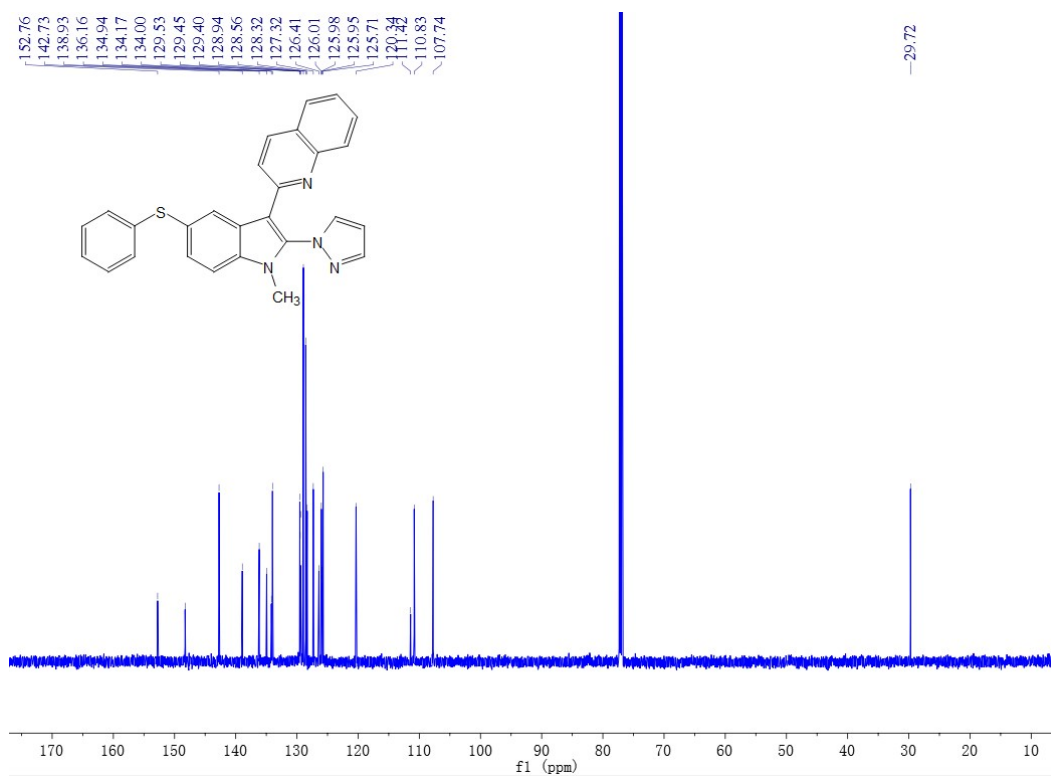

Supplement: d3cc05999e1.pdf [file d3cc05999e1.pdf]
